# Supplementary material
Source: publisher figshare collection journal article supplement (https://acs.figshare.com/ndownloader/files/3942511)
Supplement: Supplementary file 1 [file 3942511]

 
data_d412 
  
_audit_creation_method            SHELXL-2013 
_chemical_name_systematic 
; 
 ? 
; 
_chemical_name_common             ? 
_chemical_melting_point           ? 
_chemical_formula_moiety          ? 
_chemical_formula_sum 
 'C28 H33 N3 O9 S2' 
_chemical_formula_weight          619.69 
  
loop_ 
 _atom_type_symbol 
 _atom_type_description 
 _atom_type_scat_dispersion_real 
 _atom_type_scat_dispersion_imag 
 _atom_type_scat_source 
 'C'  'C'   0.0033   0.0016 
 'International Tables Vol C Tables 4.2.6.8 and 6.1.1.4' 
 'H'  'H'   0.0000   0.0000 
 'International Tables Vol C Tables 4.2.6.8 and 6.1.1.4' 
 'N'  'N'   0.0061   0.0033 
 'International Tables Vol C Tables 4.2.6.8 and 6.1.1.4' 
 'O'  'O'   0.0106   0.0060 
 'International Tables Vol C Tables 4.2.6.8 and 6.1.1.4' 
 'S'  'S'   0.1246   0.1234 
 'International Tables Vol C Tables 4.2.6.8 and 6.1.1.4' 
  
_space_group_crystal_system       monoclinic 
_space_group_IT_number            5 
_space_group_name_H-M_alt         'C 2' 
_space_group_name_Hall            'C 2y' 
  
_shelx_space_group_comment 
; 
The symmetry employed for this shelxl refinement is uniquely defined 
by the following loop, which should always be used as a source of 
symmetry information in preference to the above space-group names. 
They are only intended as comments. 
; 
  
loop_ 
 _space_group_symop_operation_xyz 
 'x, y, z' 
 '-x, y, -z' 
 'x+1/2, y+1/2, z' 
 '-x+1/2, y+1/2, -z' 
  
_cell_length_a                    29.758(3) 
_cell_length_b                    6.7860(7) 
_cell_length_c                    16.7258(18) 
_cell_angle_alpha                 90 
_cell_angle_beta                  117.029(3) 
_cell_angle_gamma                 90 
_cell_volume                      3008.7(6) 
_cell_formula_units_Z             4 
_cell_measurement_temperature     100(2) 
_cell_measurement_reflns_used     9916 
_cell_measurement_theta_min       2.45 
_cell_measurement_theta_max       23.09 
  
_exptl_crystal_description        Rod 
_exptl_crystal_colour             colourless 
_exptl_crystal_density_meas       'Not Measured' 
_exptl_crystal_density_method     ? 
_exptl_crystal_density_diffrn     1.368 
_exptl_crystal_F_000              1304 
_exptl_transmission_factor_min    ? 
_exptl_transmission_factor_max    ? 
_exptl_crystal_size_max           0.420 
_exptl_crystal_size_mid           0.140 
_exptl_crystal_size_min           0.070 
_exptl_absorpt_coefficient_mu     0.234 
_shelx_estimated_absorpt_T_min    0.908 
_shelx_estimated_absorpt_T_max    0.984 
_exptl_absorpt_correction_type    Multi-scan 
_exptl_absorpt_correction_T_min   0.6892 
_exptl_absorpt_correction_T_max   0.7449 
_exptl_absorpt_process_details    'Sadabs, (Sheldrick 2008)'
  
_exptl_special_details 
; 
 ? 
; 
  
_diffrn_ambient_temperature       100(2) 
_diffrn_radiation_wavelength      0.71073 
_diffrn_radiation_type            MoK\a 
_diffrn_source                    ? 
_diffrn_measurement_device_type   'Bruker D8 Venture' 
_diffrn_measurement_method        '\f and \w scans' 
_diffrn_detector_area_resol_mean  ? 
_diffrn_reflns_number             49192 
_diffrn_reflns_av_unetI/netI      0.0569 
_diffrn_reflns_av_R_equivalents   0.0762 
_diffrn_reflns_limit_h_min        -38 
_diffrn_reflns_limit_h_max        38 
_diffrn_reflns_limit_k_min        -8 
_diffrn_reflns_limit_k_max        8 
_diffrn_reflns_limit_l_min        -21 
_diffrn_reflns_limit_l_max        21 
_diffrn_reflns_theta_min          2.738 
_diffrn_reflns_theta_max          27.497 
_diffrn_reflns_theta_full         25.242 
_diffrn_measured_fraction_theta_max   0.998 
_diffrn_measured_fraction_theta_full  0.998 
_diffrn_reflns_Laue_measured_fraction_max    0.998 
_diffrn_reflns_Laue_measured_fraction_full   0.998 
_diffrn_reflns_point_group_measured_fraction_max   0.999 
_diffrn_reflns_point_group_measured_fraction_full  0.998 
_reflns_number_total              6898 
_reflns_number_gt                 5388 
_reflns_threshold_expression      'I > 2\s(I)' 
_reflns_Friedel_coverage          0.844 
_reflns_Friedel_fraction_max      0.999 
_reflns_Friedel_fraction_full     0.999 
  
_reflns_special_details 
; 
 Reflections were merged by SHELXL according to the crystal 
 class for the calculation of statistics and refinement. 
  
 _reflns_Friedel_fraction is defined as the number of unique 
 Friedel pairs measured divided by the number that would be 
 possible theoretically, ignoring centric projections and 
 systematic absences. 
; 
  
_computing_data_collection        'Bruker APEX2' 
_computing_cell_refinement        'Bruker SAINT' 
_computing_data_reduction         'Bruker SAINT' 
_computing_structure_solution     'SHELXS-97 (Sheldrick, 2008)' 
_computing_structure_refinement   'SHELXL-2013 (Sheldrick, 2013)' 
_computing_molecular_graphics     'Bruker SHELXTL' 
_computing_publication_material   'Bruker SHELXTL' 
  
_refine_special_details 
; 
 ? 
; 
_refine_ls_structure_factor_coef  Fsqd 
_refine_ls_matrix_type            full 
_refine_ls_weighting_scheme       calc 
_refine_ls_weighting_details 
'w=1/[\s^2^(Fo^2^)+(0.0366P)^2^+4.6305P] where P=(Fo^2^+2Fc^2^)/3' 
_atom_sites_solution_primary      ? 
_atom_sites_solution_secondary    ? 
_atom_sites_solution_hydrogens    mixed 
_refine_ls_hydrogen_treatment     mixed 
_refine_ls_extinction_method      none 
_refine_ls_extinction_coef        . 
_refine_ls_abs_structure_details 
; 
 Flack x determined using 2086 quotients [(I+)-(I-)]/[(I+)+(I-)] 
 (Parsons and Flack (2004), Acta Cryst. A60, s61). 
; 
_refine_ls_abs_structure_Flack    0.04(2) 
_chemical_absolute_configuration  rmad 
_refine_ls_number_reflns          6898 
_refine_ls_number_parameters      473 
_refine_ls_number_restraints      6 
_refine_ls_R_factor_all           0.0826 
_refine_ls_R_factor_gt            0.0536 
_refine_ls_wR_factor_ref          0.1122 
_refine_ls_wR_factor_gt           0.1033 
_refine_ls_goodness_of_fit_ref    1.051 
_refine_ls_restrained_S_all       1.051 
_refine_ls_shift/su_max           0.000 
_refine_ls_shift/su_mean          0.000 
  
loop_ 
 _atom_site_label 
 _atom_site_type_symbol 
 _atom_site_fract_x 
 _atom_site_fract_y 
 _atom_site_fract_z 
 _atom_site_U_iso_or_equiv 
 _atom_site_adp_type 
 _atom_site_occupancy 
 _atom_site_site_symmetry_order 
 _atom_site_calc_flag 
 _atom_site_refinement_flags_posn 
 _atom_site_refinement_flags_adp 
 _atom_site_refinement_flags_occupancy 
 _atom_site_disorder_assembly 
 _atom_site_disorder_group 
C1N C 0.4776(5) 0.569(2) 0.4842(11) 0.088(5) Uiso 0.5 1 d D . P A -1 
H1N1 H 0.4812 0.5644 0.5454 0.132 Uiso 0.5 1 calc R U P A -1 
H1N2 H 0.4417 0.5685 0.4411 0.132 Uiso 0.5 1 calc R U P A -1 
H1N3 H 0.4935 0.6885 0.4764 0.132 Uiso 0.5 1 calc R U P A -1 
O1N O 0.5020(8) 0.396(3) 0.4688(12) 0.182(7) Uiso 0.5 1 d D . P A -1 
H1N H 0.5333 0.4025 0.5018 0.273 Uiso 0.5 1 calc R U P A -1 
C1M C 0.5289(5) 0.813(2) 0.3693(9) 0.083(4) Uiso 0.5 1 d . . P B 2 
H1M1 H 0.5146 0.9103 0.3949 0.124 Uiso 0.5 1 calc R U P B 2 
H1M2 H 0.5356 0.8766 0.3232 0.124 Uiso 0.5 1 calc R U P B 2 
H1M3 H 0.5604 0.7612 0.4168 0.124 Uiso 0.5 1 calc R U P B 2 
O1M O 0.4912(4) 0.6439(16) 0.3270(7) 0.090(3) Uiso 0.5 1 d . . P B 2 
H1M H 0.5035 0.5392 0.3554 0.136 Uiso 0.5 1 calc R U P B 2 
S1 S 0.42246(7) 0.8819(3) -0.17490(13) 0.0238(4) Uani 0.5 1 d . . P C 1 
O5S O 0.44091(19) 0.7380(10) -0.2141(4) 0.0314(14) Uani 0.5 1 d . . P C 1 
O6S O 0.4450(2) 1.0737(9) -0.1528(4) 0.0345(15) Uani 0.5 1 d . . P C 1 
O7S O 0.4624(3) 0.3627(13) 0.1863(4) 0.0507(18) Uani 0.5 1 d . . P C 1 
O8S O 0.4468(3) 0.6462(13) 0.2275(5) 0.063(2) Uani 0.5 1 d . . P C 1 
N3S N 0.4514(4) 0.5356(16) 0.1725(6) 0.043(2) Uani 0.5 1 d . . P C 1 
C1S C 0.4284(2) 0.7797(7) -0.0744(3) 0.0239(18) Uani 0.5 1 d G . P C 1 
C2S C 0.4320(2) 0.5766(7) -0.0623(3) 0.0280(19) Uani 0.5 1 d G . P C 1 
H2S H 0.4300 0.4928 -0.1093 0.034 Uiso 0.5 1 calc R U P C 1 
C3S C 0.4385(2) 0.4961(6) 0.0187(3) 0.0293(19) Uani 0.5 1 d G . P C 1 
H3S H 0.4409 0.3573 0.0270 0.035 Uiso 0.5 1 calc R U P C 1 
C4S C 0.4415(2) 0.6187(8) 0.0875(3) 0.030(2) Uani 0.5 1 d G . P C 1 
C5S C 0.4379(2) 0.8217(8) 0.0754(3) 0.0318(19) Uani 0.5 1 d G . P C 1 
H5S H 0.4400 0.9055 0.1224 0.038 Uiso 0.5 1 calc R U P C 1 
C6S C 0.4314(2) 0.9022(6) -0.0056(3) 0.0301(19) Uani 0.5 1 d G . P C 1 
H6S H 0.4290 1.0410 -0.0139 0.036 Uiso 0.5 1 calc R U P C 1 
S2 S 0.39940(7) 0.8803(3) -0.11148(11) 0.0196(4) Uani 0.5 1 d . . P C 2 
O5X O 0.38086(18) 0.7408(8) -0.0698(3) 0.0245(12) Uani 0.5 1 d . . P C 2 
O6X O 0.4140(2) 1.0743(8) -0.0733(4) 0.0269(13) Uani 0.5 1 d . . P C 2 
O7X O 0.6068(2) 0.6142(11) -0.1360(5) 0.0480(18) Uani 0.5 1 d . . P C 2 
O8X O 0.5810(3) 0.3313(13) -0.1170(6) 0.057(2) Uani 0.5 1 d . . P C 2 
N3X N 0.5765(3) 0.5063(17) -0.1254(7) 0.041(2) Uani 0.5 1 d . . P C 2 
C1X C 0.45087(14) 0.7726(7) -0.1166(3) 0.0163(16) Uani 0.5 1 d G . P C 2 
C2X C 0.45540(15) 0.5686(6) -0.1149(3) 0.0189(16) Uani 0.5 1 d G . P C 2 
H2X H 0.4303 0.4883 -0.1112 0.023 Uiso 0.5 1 calc R U P C 2 
C3X C 0.49670(18) 0.4820(6) -0.1188(4) 0.0235(18) Uani 0.5 1 d G . P C 2 
H3X H 0.4998 0.3426 -0.1177 0.028 Uiso 0.5 1 calc R U P C 2 
C4X C 0.53345(15) 0.5995(8) -0.1244(4) 0.028(2) Uani 0.5 1 d G . P C 2 
C5X C 0.52892(16) 0.8035(7) -0.1260(4) 0.0297(19) Uani 0.5 1 d G . P C 2 
H5X H 0.5540 0.8837 -0.1298 0.036 Uiso 0.5 1 calc R U P C 2 
C6X C 0.48762(18) 0.8900(5) -0.1221(3) 0.0239(17) Uani 0.5 1 d G . P C 2 
H6X H 0.4845 1.0295 -0.1232 0.029 Uiso 0.5 1 calc R U P C 2 
S3 S 0.27137(3) 0.33315(17) -0.26343(6) 0.0214(2) Uani 1 1 d . . . . . 
O2 O 0.15777(10) 0.7222(5) -0.52148(17) 0.0310(7) Uani 1 1 d . . . . . 
O1 O 0.12601(16) 1.0225(7) -0.5224(3) 0.0654(12) Uani 1 1 d . . . . . 
O3 O 0.23726(10) 0.1962(4) -0.32822(17) 0.0260(6) Uani 1 1 d . . . . . 
O4 O 0.32467(10) 0.3032(4) -0.23415(18) 0.0299(7) Uani 1 1 d . . . . . 
N1 N 0.25428(12) 0.5540(5) -0.30317(19) 0.0184(7) Uani 1 1 d . . . . . 
N2 N 0.36180(13) 0.9150(5) -0.2268(3) 0.0441(11) Uani 1 1 d D . . . . 
H2N H 0.359(3) 1.031(4) -0.254(4) 0.053 Uiso 0.5 1 d D U P D 2 
H2M H 0.345(2) 1.025(5) -0.227(4) 0.053 Uiso 0.5 1 d D U P E 1 
C1 C 0.22868(14) 0.5839(6) -0.4017(2) 0.0199(8) Uani 1 1 d . . . . . 
H1 H 0.2132 0.4558 -0.4307 0.024 Uiso 1 1 calc R U . . . 
C2 C 0.26738(15) 0.6436(6) -0.4343(3) 0.0248(9) Uani 1 1 d . . . . . 
H2A H 0.2875 0.5261 -0.4328 0.030 Uiso 1 1 calc R U . . . 
H2B H 0.2491 0.6876 -0.4975 0.030 Uiso 1 1 calc R U . . . 
C3 C 0.30323(15) 0.8066(6) -0.3793(3) 0.0280(9) Uani 1 1 d . . . . . 
H3A H 0.2843 0.9316 -0.3886 0.034 Uiso 1 1 calc R U . . . 
H3B H 0.3294 0.8261 -0.3996 0.034 Uiso 1 1 calc R U . . . 
C4 C 0.32841(15) 0.7535(6) -0.2793(3) 0.0297(10) Uani 1 1 d . . . . . 
H4 H 0.3491 0.6319 -0.2702 0.036 Uiso 1 1 calc R U . . . 
C5 C 0.28837(14) 0.7120(6) -0.2498(2) 0.0232(9) Uani 1 1 d . . . . . 
H5A H 0.3047 0.6736 -0.1857 0.028 Uiso 1 1 calc R U . . . 
H5B H 0.2686 0.8334 -0.2560 0.028 Uiso 1 1 calc R U . . . 
C6 C 0.26234(15) 0.3322(6) -0.1667(2) 0.0247(8) Uani 1 1 d . . . . . 
C7 C 0.21388(17) 0.3410(8) -0.1768(3) 0.0364(10) Uani 1 1 d . . . . . 
H7 H 0.1860 0.3487 -0.2349 0.044 Uiso 1 1 calc R U . . . 
C8 C 0.2064(2) 0.3383(8) -0.1007(3) 0.0456(12) Uani 1 1 d . . . . . 
H8 H 0.1731 0.3418 -0.1070 0.055 Uiso 1 1 calc R U . . . 
C9 C 0.2469(2) 0.3305(7) -0.0157(3) 0.0452(13) Uani 1 1 d . . . . . 
C10 C 0.2946(2) 0.3215(8) -0.0080(3) 0.0480(13) Uani 1 1 d . . . . . 
H10 H 0.3225 0.3154 0.0501 0.058 Uiso 1 1 calc R U . . . 
C11 C 0.30349(17) 0.3211(7) -0.0827(3) 0.0355(10) Uani 1 1 d . . . . . 
H11 H 0.3368 0.3135 -0.0762 0.043 Uiso 1 1 calc R U . . . 
C12 C 0.2378(3) 0.3278(8) 0.0667(3) 0.0675(18) Uani 1 1 d . . . . . 
H12A H 0.2565 0.2182 0.1058 0.101 Uiso 1 1 calc R U . . . 
H12B H 0.2017 0.3112 0.0481 0.101 Uiso 1 1 calc R U . . . 
H12C H 0.2494 0.4523 0.0994 0.101 Uiso 1 1 calc R U . . . 
C13 C 0.18606(14) 0.7344(6) -0.4244(2) 0.0234(9) Uani 1 1 d . . . . . 
H13 H 0.2004 0.8697 -0.4060 0.028 Uiso 1 1 calc R U . . . 
C14 C 0.15259(15) 0.6844(7) -0.3822(3) 0.0279(9) Uani 1 1 d . . . . . 
C15 C 0.12438(17) 0.5122(8) -0.4047(3) 0.0396(12) Uani 1 1 d . . . . . 
H15 H 0.1258 0.4237 -0.4475 0.047 Uiso 1 1 calc R U . . . 
C16 C 0.09394(19) 0.4711(10) -0.3635(4) 0.0576(16) Uani 1 1 d . . . . . 
H16 H 0.0745 0.3534 -0.3781 0.069 Uiso 1 1 calc R U . . . 
C17 C 0.0917(2) 0.5995(12) -0.3016(4) 0.0660(18) Uani 1 1 d . . . . . 
H17 H 0.0706 0.5704 -0.2744 0.079 Uiso 1 1 calc R U . . . 
C18 C 0.1196(2) 0.7679(11) -0.2793(4) 0.0645(19) Uani 1 1 d . . . . . 
H18 H 0.1184 0.8550 -0.2358 0.077 Uiso 1 1 calc R U . . . 
C19 C 0.14942(17) 0.8113(9) -0.3201(3) 0.0423(12) Uani 1 1 d . . . . . 
H19 H 0.1682 0.9305 -0.3053 0.051 Uiso 1 1 calc R U . . . 
C20 C 0.12622(16) 0.8765(9) -0.5616(3) 0.0418(13) Uani 1 1 d . . . . . 
C21 C 0.09291(17) 0.8279(11) -0.6586(3) 0.0618(17) Uani 1 1 d . . . . . 
H21A H 0.0728 0.9437 -0.6892 0.093 Uiso 1 1 calc R U . . . 
H21B H 0.0704 0.7188 -0.6626 0.093 Uiso 1 1 calc R U . . . 
H21C H 0.1139 0.7894 -0.6873 0.093 Uiso 1 1 calc R U . . . 
  
loop_ 
 _atom_site_aniso_label 
 _atom_site_aniso_U_11 
 _atom_site_aniso_U_22 
 _atom_site_aniso_U_33 
 _atom_site_aniso_U_23 
 _atom_site_aniso_U_13 
 _atom_site_aniso_U_12 
S1 0.0205(9) 0.0240(11) 0.0243(9) 0.0035(8) 0.0079(8) 0.0002(8) 
O5S 0.022(3) 0.044(4) 0.028(3) -0.001(3) 0.011(2) 0.005(3) 
O6S 0.030(3) 0.029(4) 0.036(3) 0.006(3) 0.008(3) -0.011(3) 
O7S 0.051(4) 0.057(5) 0.039(4) 0.022(4) 0.016(3) 0.001(4) 
O8S 0.091(6) 0.072(6) 0.032(4) -0.003(4) 0.033(4) -0.016(5) 
N3S 0.034(5) 0.068(8) 0.028(5) 0.005(5) 0.014(4) -0.009(5) 
C1S 0.018(4) 0.020(5) 0.024(4) -0.002(3) 0.001(3) 0.005(3) 
C2S 0.030(5) 0.025(5) 0.022(4) -0.005(4) 0.006(4) 0.000(4) 
C3S 0.028(5) 0.028(5) 0.024(4) 0.002(4) 0.005(4) -0.003(4) 
C4S 0.019(5) 0.048(6) 0.018(5) 0.000(4) 0.004(4) -0.004(5) 
C5S 0.031(4) 0.039(5) 0.025(4) -0.010(4) 0.012(4) -0.003(5) 
C6S 0.027(4) 0.027(5) 0.032(4) -0.008(4) 0.009(4) 0.000(4) 
S2 0.0208(9) 0.0206(11) 0.0143(8) -0.0021(8) 0.0052(7) 0.0024(8) 
O5X 0.021(3) 0.035(3) 0.016(2) 0.003(2) 0.008(2) 0.004(2) 
O6X 0.028(3) 0.022(3) 0.023(3) -0.006(2) 0.005(2) 0.002(2) 
O7X 0.031(4) 0.059(5) 0.060(5) -0.020(4) 0.027(3) -0.010(3) 
O8X 0.042(4) 0.043(5) 0.099(6) -0.020(5) 0.042(4) 0.000(4) 
N3X 0.014(4) 0.068(8) 0.040(5) -0.029(5) 0.012(4) -0.011(5) 
C1X 0.018(3) 0.020(4) 0.003(3) 0.000(3) -0.003(3) 0.003(3) 
C2X 0.019(4) 0.022(4) 0.015(3) -0.004(3) 0.008(3) -0.008(3) 
C3X 0.018(4) 0.026(5) 0.023(4) -0.012(3) 0.006(3) -0.006(3) 
C4X 0.014(4) 0.040(6) 0.028(5) -0.011(4) 0.008(4) 0.003(4) 
C5X 0.026(4) 0.040(6) 0.023(4) -0.003(4) 0.011(3) -0.003(4) 
C6X 0.023(4) 0.020(4) 0.025(4) -0.002(3) 0.008(3) 0.001(3) 
S3 0.0303(5) 0.0144(5) 0.0195(4) -0.0026(4) 0.0114(4) 0.0016(4) 
O2 0.0293(15) 0.0410(19) 0.0176(13) 0.0077(13) 0.0062(11) -0.0004(14) 
O1 0.071(3) 0.052(3) 0.056(2) 0.015(2) 0.014(2) 0.031(2) 
O3 0.0385(16) 0.0176(15) 0.0234(14) -0.0066(12) 0.0153(12) -0.0049(13) 
O4 0.0324(15) 0.0185(16) 0.0363(15) -0.0011(13) 0.0135(12) 0.0051(12) 
N1 0.0245(17) 0.0152(17) 0.0138(15) -0.0014(13) 0.0072(13) 0.0021(13) 
N2 0.0242(19) 0.021(2) 0.058(3) 0.0006(18) -0.0064(18) 0.0011(16) 
C1 0.024(2) 0.018(2) 0.0163(18) -0.0015(15) 0.0088(15) 0.0018(16) 
C2 0.028(2) 0.028(2) 0.026(2) -0.0023(17) 0.0180(17) -0.0016(17) 
C3 0.027(2) 0.019(2) 0.041(2) 0.0021(19) 0.0182(17) -0.0001(17) 
C4 0.021(2) 0.014(2) 0.042(2) -0.0031(17) 0.0036(17) 0.0034(16) 
C5 0.030(2) 0.013(2) 0.0174(18) -0.0016(15) 0.0030(15) 0.0025(16) 
C6 0.046(2) 0.0130(18) 0.0177(16) -0.0034(18) 0.0163(16) -0.001(2) 
C7 0.055(3) 0.033(3) 0.027(2) -0.003(2) 0.0238(19) 0.001(2) 
C8 0.079(3) 0.032(3) 0.046(3) 0.004(3) 0.046(3) 0.008(3) 
C9 0.106(4) 0.011(2) 0.030(2) -0.001(2) 0.041(3) -0.004(3) 
C10 0.087(4) 0.027(3) 0.020(2) 0.005(2) 0.015(2) -0.010(3) 
C11 0.052(3) 0.021(2) 0.0243(19) 0.004(2) 0.0095(18) -0.008(2) 
C12 0.164(6) 0.017(2) 0.047(3) 0.005(3) 0.071(4) 0.003(4) 
C13 0.0239(19) 0.026(2) 0.0165(17) -0.0007(16) 0.0055(15) -0.0026(17) 
C14 0.026(2) 0.036(3) 0.0221(19) 0.0063(18) 0.0110(16) 0.0081(19) 
C15 0.029(2) 0.050(3) 0.041(3) 0.008(2) 0.017(2) -0.001(2) 
C16 0.036(3) 0.072(4) 0.069(4) 0.017(3) 0.027(3) -0.006(3) 
C17 0.058(4) 0.096(5) 0.069(4) 0.017(4) 0.051(3) 0.009(4) 
C18 0.057(3) 0.094(6) 0.061(4) 0.000(3) 0.043(3) 0.014(3) 
C19 0.039(2) 0.053(3) 0.041(2) 0.003(3) 0.023(2) 0.014(2) 
C20 0.029(2) 0.063(4) 0.029(2) 0.019(3) 0.0101(19) 0.007(3) 
C21 0.038(3) 0.112(5) 0.028(2) 0.033(3) 0.0083(19) 0.013(3) 
  
_geom_special_details 
; 
 All esds (except the esd in the dihedral angle between two l.s. planes) 
 are estimated using the full covariance matrix.  The cell esds are taken 
 into account individually in the estimation of esds in distances, angles 
 and torsion angles; correlations between esds in cell parameters are only 
 used when they are defined by crystal symmetry.  An approximate (isotropic) 
 treatment of cell esds is used for estimating esds involving l.s. planes. 
; 
  
loop_ 
 _geom_bond_atom_site_label_1 
 _geom_bond_atom_site_label_2 
 _geom_bond_distance 
 _geom_bond_site_symmetry_2 
 _geom_bond_publ_flag 
C1N O1N 1.461(12) . ? 
C1N H1N1 0.9800 . ? 
C1N H1N2 0.9800 . ? 
C1N H1N3 0.9800 . ? 
O1N H1N 0.8400 . ? 
C1M O1M 1.536(17) . ? 
C1M H1M1 0.9800 . ? 
C1M H1M2 0.9800 . ? 
C1M H1M3 0.9800 . ? 
O1M H1M 0.8400 . ? 
S1 O5S 1.419(6) . ? 
S1 O6S 1.433(6) . ? 
S1 N2 1.624(4) . ? 
S1 C1S 1.751(4) . ? 
O7S N3S 1.212(12) . ? 
O8S N3S 1.241(12) . ? 
N3S C4S 1.430(10) . ? 
C1S C2S 1.3900 . ? 
C1S C6S 1.3900 . ? 
C2S C3S 1.3900 . ? 
C2S H2S 0.9500 . ? 
C3S C4S 1.3900 . ? 
C3S H3S 0.9500 . ? 
C4S C5S 1.3900 . ? 
C5S C6S 1.3900 . ? 
C5S H5S 0.9500 . ? 
C6S H6S 0.9500 . ? 
S2 O5X 1.427(6) . ? 
S2 O6X 1.441(6) . ? 
S2 C1X 1.734(4) . ? 
S2 N2 1.751(4) . ? 
O7X N3X 1.237(11) . ? 
O8X N3X 1.196(12) . ? 
N3X C4X 1.434(10) . ? 
C1X C2X 1.3900 . ? 
C1X C6X 1.3900 . ? 
C2X C3X 1.3900 . ? 
C2X H2X 0.9500 . ? 
C3X C4X 1.3900 . ? 
C3X H3X 0.9500 . ? 
C4X C5X 1.3900 . ? 
C5X C6X 1.3900 . ? 
C5X H5X 0.9500 . ? 
C6X H6X 0.9500 . ? 
S3 O3 1.438(3) . ? 
S3 O4 1.446(3) . ? 
S3 N1 1.625(3) . ? 
S3 C6 1.757(3) . ? 
O2 C20 1.362(6) . ? 
O2 C13 1.453(4) . ? 
O1 C20 1.189(7) . ? 
N1 C5 1.467(5) . ? 
N1 C1 1.482(4) . ? 
N2 C4 1.471(5) . ? 
N2 H2N 0.8999(15) . ? 
N2 H2M 0.9000(15) . ? 
C1 C13 1.536(5) . ? 
C1 C2 1.536(5) . ? 
C1 H1 1.0000 . ? 
C2 C3 1.522(6) . ? 
C2 H2A 0.9900 . ? 
C2 H2B 0.9900 . ? 
C3 C4 1.533(6) . ? 
C3 H3A 0.9900 . ? 
C3 H3B 0.9900 . ? 
C4 C5 1.509(6) . ? 
C4 H4 1.0000 . ? 
C5 H5A 0.9900 . ? 
C5 H5B 0.9900 . ? 
C6 C7 1.375(6) . ? 
C6 C11 1.384(5) . ? 
C7 C8 1.388(5) . ? 
C7 H7 0.9500 . ? 
C8 C9 1.384(7) . ? 
C8 H8 0.9500 . ? 
C9 C10 1.368(7) . ? 
C9 C12 1.520(6) . ? 
C10 C11 1.390(6) . ? 
C10 H10 0.9500 . ? 
C11 H11 0.9500 . ? 
C12 H12A 0.9800 . ? 
C12 H12B 0.9800 . ? 
C12 H12C 0.9800 . ? 
C13 C14 1.498(5) . ? 
C13 H13 1.0000 . ? 
C14 C19 1.386(6) . ? 
C14 C15 1.388(7) . ? 
C15 C16 1.394(7) . ? 
C15 H15 0.9500 . ? 
C16 C17 1.377(9) . ? 
C16 H16 0.9500 . ? 
C17 C18 1.360(9) . ? 
C17 H17 0.9500 . ? 
C18 C19 1.375(7) . ? 
C18 H18 0.9500 . ? 
C19 H19 0.9500 . ? 
C20 C21 1.504(6) . ? 
C21 H21A 0.9800 . ? 
C21 H21B 0.9800 . ? 
C21 H21C 0.9800 . ? 
  
loop_ 
 _geom_angle_atom_site_label_1 
 _geom_angle_atom_site_label_2 
 _geom_angle_atom_site_label_3 
 _geom_angle 
 _geom_angle_site_symmetry_1 
 _geom_angle_site_symmetry_3 
 _geom_angle_publ_flag 
O1N C1N H1N1 109.5 . . ? 
O1N C1N H1N2 109.5 . . ? 
H1N1 C1N H1N2 109.5 . . ? 
O1N C1N H1N3 109.5 . . ? 
H1N1 C1N H1N3 109.5 . . ? 
H1N2 C1N H1N3 109.5 . . ? 
C1N O1N H1N 109.5 . . ? 
O1M C1M H1M1 109.5 . . ? 
O1M C1M H1M2 109.5 . . ? 
H1M1 C1M H1M2 109.5 . . ? 
O1M C1M H1M3 109.5 . . ? 
H1M1 C1M H1M3 109.5 . . ? 
H1M2 C1M H1M3 109.5 . . ? 
C1M O1M H1M 109.5 . . ? 
O5S S1 O6S 120.7(4) . . ? 
O5S S1 N2 114.7(3) . . ? 
O6S S1 N2 106.7(3) . . ? 
O5S S1 C1S 106.2(3) . . ? 
O6S S1 C1S 106.3(3) . . ? 
N2 S1 C1S 99.9(3) . . ? 
O7S N3S O8S 123.7(9) . . ? 
O7S N3S C4S 119.2(8) . . ? 
O8S N3S C4S 117.1(9) . . ? 
C2S C1S C6S 120.0 . . ? 
C2S C1S S1 120.1(3) . . ? 
C6S C1S S1 119.9(3) . . ? 
C3S C2S C1S 120.0 . . ? 
C3S C2S H2S 120.0 . . ? 
C1S C2S H2S 120.0 . . ? 
C2S C3S C4S 120.0 . . ? 
C2S C3S H3S 120.0 . . ? 
C4S C3S H3S 120.0 . . ? 
C5S C4S C3S 120.0 . . ? 
C5S C4S N3S 120.3(6) . . ? 
C3S C4S N3S 119.6(6) . . ? 
C4S C5S C6S 120.0 . . ? 
C4S C5S H5S 120.0 . . ? 
C6S C5S H5S 120.0 . . ? 
C5S C6S C1S 120.0 . . ? 
C5S C6S H6S 120.0 . . ? 
C1S C6S H6S 120.0 . . ? 
O5X S2 O6X 119.7(3) . . ? 
O5X S2 C1X 106.9(3) . . ? 
O6X S2 C1X 108.2(3) . . ? 
O5X S2 N2 115.6(3) . . ? 
O6X S2 N2 106.1(3) . . ? 
C1X S2 N2 98.0(2) . . ? 
O8X N3X O7X 123.7(9) . . ? 
O8X N3X C4X 119.3(8) . . ? 
O7X N3X C4X 117.0(10) . . ? 
C2X C1X C6X 120.0 . . ? 
C2X C1X S2 119.9(3) . . ? 
C6X C1X S2 120.1(3) . . ? 
C1X C2X C3X 120.0 . . ? 
C1X C2X H2X 120.0 . . ? 
C3X C2X H2X 120.0 . . ? 
C4X C3X C2X 120.0 . . ? 
C4X C3X H3X 120.0 . . ? 
C2X C3X H3X 120.0 . . ? 
C3X C4X C5X 120.0 . . ? 
C3X C4X N3X 118.8(5) . . ? 
C5X C4X N3X 121.2(5) . . ? 
C6X C5X C4X 120.0 . . ? 
C6X C5X H5X 120.0 . . ? 
C4X C5X H5X 120.0 . . ? 
C5X C6X C1X 120.0 . . ? 
C5X C6X H6X 120.0 . . ? 
C1X C6X H6X 120.0 . . ? 
O3 S3 O4 117.02(17) . . ? 
O3 S3 N1 107.79(17) . . ? 
O4 S3 N1 111.06(17) . . ? 
O3 S3 C6 109.91(18) . . ? 
O4 S3 C6 106.90(18) . . ? 
N1 S3 C6 103.29(18) . . ? 
C20 O2 C13 115.2(3) . . ? 
C5 N1 C1 116.1(3) . . ? 
C5 N1 S3 115.1(2) . . ? 
C1 N1 S3 119.2(2) . . ? 
C4 N2 S1 120.1(3) . . ? 
C4 N2 S2 118.5(3) . . ? 
C4 N2 H2N 118(5) . . ? 
S2 N2 H2N 123(5) . . ? 
C4 N2 H2M 113(4) . . ? 
S1 N2 H2M 127(4) . . ? 
N1 C1 C13 108.4(3) . . ? 
N1 C1 C2 110.0(3) . . ? 
C13 C1 C2 113.9(3) . . ? 
N1 C1 H1 108.1 . . ? 
C13 C1 H1 108.1 . . ? 
C2 C1 H1 108.1 . . ? 
C3 C2 C1 114.2(3) . . ? 
C3 C2 H2A 108.7 . . ? 
C1 C2 H2A 108.7 . . ? 
C3 C2 H2B 108.7 . . ? 
C1 C2 H2B 108.7 . . ? 
H2A C2 H2B 107.6 . . ? 
C2 C3 C4 110.5(3) . . ? 
C2 C3 H3A 109.6 . . ? 
C4 C3 H3A 109.6 . . ? 
C2 C3 H3B 109.6 . . ? 
C4 C3 H3B 109.6 . . ? 
H3A C3 H3B 108.1 . . ? 
N2 C4 C5 111.4(4) . . ? 
N2 C4 C3 109.8(3) . . ? 
C5 C4 C3 109.5(3) . . ? 
N2 C4 H4 108.7 . . ? 
C5 C4 H4 108.7 . . ? 
C3 C4 H4 108.7 . . ? 
N1 C5 C4 111.6(3) . . ? 
N1 C5 H5A 109.3 . . ? 
C4 C5 H5A 109.3 . . ? 
N1 C5 H5B 109.3 . . ? 
C4 C5 H5B 109.3 . . ? 
H5A C5 H5B 108.0 . . ? 
C7 C6 C11 121.5(4) . . ? 
C7 C6 S3 118.5(3) . . ? 
C11 C6 S3 120.0(3) . . ? 
C6 C7 C8 118.8(4) . . ? 
C6 C7 H7 120.6 . . ? 
C8 C7 H7 120.6 . . ? 
C9 C8 C7 121.1(5) . . ? 
C9 C8 H8 119.5 . . ? 
C7 C8 H8 119.5 . . ? 
C10 C9 C8 118.6(4) . . ? 
C10 C9 C12 121.2(5) . . ? 
C8 C9 C12 120.2(5) . . ? 
C9 C10 C11 122.0(4) . . ? 
C9 C10 H10 119.0 . . ? 
C11 C10 H10 119.0 . . ? 
C6 C11 C10 118.0(4) . . ? 
C6 C11 H11 121.0 . . ? 
C10 C11 H11 121.0 . . ? 
C9 C12 H12A 109.5 . . ? 
C9 C12 H12B 109.5 . . ? 
H12A C12 H12B 109.5 . . ? 
C9 C12 H12C 109.5 . . ? 
H12A C12 H12C 109.5 . . ? 
H12B C12 H12C 109.5 . . ? 
O2 C13 C14 110.0(3) . . ? 
O2 C13 C1 103.4(3) . . ? 
C14 C13 C1 112.6(3) . . ? 
O2 C13 H13 110.2 . . ? 
C14 C13 H13 110.2 . . ? 
C1 C13 H13 110.2 . . ? 
C19 C14 C15 119.2(4) . . ? 
C19 C14 C13 120.0(4) . . ? 
C15 C14 C13 120.9(4) . . ? 
C14 C15 C16 118.9(5) . . ? 
C14 C15 H15 120.5 . . ? 
C16 C15 H15 120.5 . . ? 
C17 C16 C15 120.6(6) . . ? 
C17 C16 H16 119.7 . . ? 
C15 C16 H16 119.7 . . ? 
C18 C17 C16 120.4(5) . . ? 
C18 C17 H17 119.8 . . ? 
C16 C17 H17 119.8 . . ? 
C17 C18 C19 119.6(6) . . ? 
C17 C18 H18 120.2 . . ? 
C19 C18 H18 120.2 . . ? 
C18 C19 C14 121.2(6) . . ? 
C18 C19 H19 119.4 . . ? 
C14 C19 H19 119.4 . . ? 
O1 C20 O2 123.0(4) . . ? 
O1 C20 C21 127.7(5) . . ? 
O2 C20 C21 109.3(5) . . ? 
C20 C21 H21A 109.5 . . ? 
C20 C21 H21B 109.5 . . ? 
H21A C21 H21B 109.5 . . ? 
C20 C21 H21C 109.5 . . ? 
H21A C21 H21C 109.5 . . ? 
H21B C21 H21C 109.5 . . ? 
  
loop_ 
 _geom_hbond_atom_site_label_D 
 _geom_hbond_atom_site_label_H 
 _geom_hbond_atom_site_label_A 
 _geom_hbond_distance_DH 
 _geom_hbond_distance_HA 
 _geom_hbond_distance_DA 
 _geom_hbond_angle_DHA 
 _geom_hbond_site_symmetry_A 
C21 H21A O5S  0.98 2.48 3.368(9) 149.8 4_554 
C13 H13 O3  1.00 2.55 3.536(5) 168.1 1_565 
C5 H5A O5X  0.99 2.26 3.024(6) 133.1 . 
C4 H4 O4  1.00 2.50 3.162(5) 123.0 . 
C1 H1 O3  1.00 2.33 2.866(5) 112.3 . 
N2 H2M O4  0.9000(15) 1.969(18) 2.838(5) 162(5) 1_565 
N2 H2M S3  0.9000(15) 2.882(15) 3.765(4) 167(6) 1_565 
N2 H2M O4  0.9000(15) 1.969(18) 2.838(5) 162(5) 1_565 
C1M H1M3 O1  0.98 2.38 3.282(15) 152.9 3_546 
C21 H21A O5S  0.98 2.48 3.368(9) 149.8 4_554 
C13 H13 O3  1.00 2.55 3.536(5) 168.1 1_565 
C5 H5A O5X  0.99 2.26 3.024(6) 133.1 . 
C4 H4 O4  1.00 2.50 3.162(5) 123.0 . 
C1 H1 O3  1.00 2.33 2.866(5) 112.3 . 
N2 H2M O4  0.9000(15) 1.969(18) 2.838(5) 162(5) 1_565 
N2 H2M S3  0.9000(15) 2.882(15) 3.765(4) 167(6) 1_565 
N2 H2M O4  0.9000(15) 1.969(18) 2.838(5) 162(5) 1_565 
C1M H1M3 O1  0.98 2.38 3.282(15) 152.9 3_546 
C21 H21A O5S  0.98 2.48 3.368(9) 149.8 4_554 
C13 H13 O3  1.00 2.55 3.536(5) 168.1 1_565 
C5 H5A O5X  0.99 2.26 3.024(6) 133.1 . 
C4 H4 O4  1.00 2.50 3.162(5) 123.0 . 
C1 H1 O3  1.00 2.33 2.866(5) 112.3 . 
N2 H2M O4  0.9000(15) 1.969(18) 2.838(5) 162(5) 1_565 
N2 H2M S3  0.9000(15) 2.882(15) 3.765(4) 167(6) 1_565 
N2 H2M O4  0.9000(15) 1.969(18) 2.838(5) 162(5) 1_565 
C1M H1M3 O1  0.98 2.38 3.282(15) 152.9 3_546 
C1M H1M3 O1  0.98 2.38 3.282(15) 152.9 3_546 
N2 H2M O4  0.9000(15) 1.969(18) 2.838(5) 162(5) 1_565 
N2 H2M S3  0.9000(15) 2.882(15) 3.765(4) 167(6) 1_565 
N2 H2M O4  0.9000(15) 1.969(18) 2.838(5) 162(5) 1_565 
C1 H1 O3  1.00 2.33 2.866(5) 112.3 . 
C4 H4 O4  1.00 2.50 3.162(5) 123.0 . 
C5 H5A O5X  0.99 2.26 3.024(6) 133.1 . 
C13 H13 O3  1.00 2.55 3.536(5) 168.1 1_565 
C21 H21A O5S  0.98 2.48 3.368(9) 149.8 4_554 
C1M H1M3 O1  0.98 2.38 3.282(15) 152.9 3_546 
N2 H2M O4  0.9000(15) 1.969(18) 2.838(5) 162(5) 1_565 
N2 H2M S3  0.9000(15) 2.882(15) 3.765(4) 167(6) 1_565 
N2 H2M O4  0.9000(15) 1.969(18) 2.838(5) 162(5) 1_565 
C1 H1 O3  1.00 2.33 2.866(5) 112.3 . 
C4 H4 O4  1.00 2.50 3.162(5) 123.0 . 
C5 H5A O5X  0.99 2.26 3.024(6) 133.1 . 
C13 H13 O3  1.00 2.55 3.536(5) 168.1 1_565 
C21 H21A O5S  0.98 2.48 3.368(9) 149.8 4_554 
C1M H1M3 O1  0.98 2.38 3.282(15) 152.9 3_546 
N2 H2M O4  0.9000(15) 1.969(18) 2.838(5) 162(5) 1_565 
N2 H2M S3  0.9000(15) 2.882(15) 3.765(4) 167(6) 1_565 
N2 H2M O4  0.9000(15) 1.969(18) 2.838(5) 162(5) 1_565 
C1 H1 O3  1.00 2.33 2.866(5) 112.3 . 
C4 H4 O4  1.00 2.50 3.162(5) 123.0 . 
C5 H5A O5X  0.99 2.26 3.024(6) 133.1 . 
C13 H13 O3  1.00 2.55 3.536(5) 168.1 1_565 
C21 H21A O5S  0.98 2.48 3.368(9) 149.8 4_554 
  
_refine_diff_density_max    0.579 
_refine_diff_density_min   -0.329 
_refine_diff_density_rms    0.055 
  
_shelxl_version_number 2013-3 
  
_shelx_res_file 
; 
TITL mo_D412_0m in C2 
CELL 0.71073 29.7580 6.7860 16.7258 90.000 117.029 90.000 
ZERR 4.00 0.0031 0.0007 0.0018 0.000 0.003 0.000 
LATT -7 
SYMM -x, y, -z 
SFAC C  H  N  O  S 
UNIT 112  132  12  36  8 
OMIT 0 0 2 
OMIT -1 55 
L.S. 20 
ACTA 
BOND $H 
FMAP 2 
PLAN 20 
HTAB C21 O5S_$3 
HTAB C13 O3_$2 
HTAB C5 O5X 
HTAB C4 O4 
HTAB C1 O3 
HTAB N2 O4_$2 
HTAB N2 S3_$2 
HTAB N2 O4_$2 
HTAB C1M O1_$1 
HTAB C21 O5S_$3 
HTAB C13 O3_$2 
HTAB C5 O5X 
HTAB C4 O4 
HTAB C1 O3 
HTAB N2 O4_$2 
HTAB N2 S3_$2 
HTAB N2 O4_$2 
HTAB C1M O1_$1 
HTAB C21 O5S_$3 
HTAB C13 O3_$2 
HTAB C5 O5X 
HTAB C4 O4 
HTAB C1 O3 
HTAB N2 O4_$2 
HTAB N2 S3_$2 
HTAB N2 O4_$2 
HTAB C1M O1_$1 
SIZE 0.42 0.14 0.07 
htab 
EQIV $1 x+1/2, y-1/2, z+1 
HTAB C1M O1_$1 
EQIV $2 x, y+1, z 
HTAB N2 O4_$2 
HTAB N2 S3_$2 
HTAB N2 O4_$2 
HTAB C1 O3 
HTAB C4 O4 
HTAB C5 O5X 
HTAB C13 O3_$2 
EQIV $3 -x+1/2, y+1/2, -z-1 
HTAB C21 O5S_$3 
HTAB C1M O1_$1 
HTAB N2 O4_$2 
HTAB N2 S3_$2 
HTAB N2 O4_$2 
HTAB C1 O3 
HTAB C4 O4 
HTAB C5 O5X 
HTAB C13 O3_$2 
HTAB C21 O5S_$3 
HTAB C1M O1_$1 
HTAB N2 O4_$2 
HTAB N2 S3_$2 
HTAB N2 O4_$2 
HTAB C1 O3 
HTAB C4 O4 
HTAB C5 O5X 
HTAB C13 O3_$2 
HTAB C21 O5S_$3 
DFIX 0.90 0.001 N2 H2M N2 H2N 
DFIX 1.48 0.01 C1N O1N 
FLAT S1 N2 C4 H2M 
FLAT S2 N2 C4 H2N 
TEMP -173.050 
WGHT    0.036600    4.630500 
FVAR       0.13127 
PART -1 
C1N   1    0.477602    0.568541    0.484182    10.50000    0.08823 
AFIX 137 
H1N1  2    0.481218    0.564358    0.545392    10.50000   -1.50000 
H1N2  2    0.441709    0.568512    0.441120    10.50000   -1.50000 
H1N3  2    0.493512    0.688506    0.476351    10.50000   -1.50000 
AFIX   0 
O1N   4    0.501999    0.396001    0.468803    10.50000    0.18174 
AFIX 147 
H1N   2    0.533271    0.402508    0.501763    10.50000   -1.50000 
PART 2 
AFIX   0 
C1M   1    0.528874    0.813348    0.369307    10.50000    0.08290 
AFIX 137 
H1M1  2    0.514646    0.910324    0.394905    10.50000   -1.50000 
H1M2  2    0.535597    0.876603    0.323158    10.50000   -1.50000 
H1M3  2    0.560436    0.761208    0.416816    10.50000   -1.50000 
AFIX   0 
O1M   4    0.491162    0.643893    0.327045    10.50000    0.09048 
AFIX 147 
H1M   2    0.503477    0.539200    0.355361    10.50000   -1.50000 
PART 1 
AFIX   0 
S1    5    0.422456    0.881950   -0.174903    10.50000    0.02045    0.02404 = 
         0.02427    0.00352    0.00788    0.00020 
O5S   4    0.440906    0.738039   -0.214113    10.50000    0.02190    0.04404 = 
         0.02808   -0.00068    0.01124    0.00466 
O6S   4    0.444956    1.073736   -0.152815    10.50000    0.03037    0.02861 = 
         0.03621    0.00570    0.00792   -0.01097 
O7S   4    0.462405    0.362690    0.186349    10.50000    0.05094    0.05698 = 
         0.03915    0.02230    0.01608    0.00088 
O8S   4    0.446833    0.646162    0.227482    10.50000    0.09091    0.07204 = 
         0.03159   -0.00343    0.03257   -0.01552 
N3S   3    0.451354    0.535552    0.172493    10.50000    0.03422    0.06812 = 
         0.02810    0.00477    0.01416   -0.00936 
AFIX  66 
C1S   1    0.428438    0.779657   -0.074438    10.50000    0.01799    0.02038 = 
         0.02372   -0.00189    0.00105    0.00458 
C2S   1    0.431984    0.576584   -0.062268    10.50000    0.03038    0.02549 = 
         0.02182   -0.00513    0.00630    0.00020 
AFIX  43 
H2S   2    0.429953    0.492806   -0.109301    10.50000   -1.20000 
AFIX  65 
C3S   1    0.438503    0.496090    0.018720    10.50000    0.02795    0.02786 = 
         0.02449    0.00160    0.00530   -0.00305 
AFIX  43 
H3S   2    0.440926    0.357298    0.027038    10.50000   -1.20000 
AFIX  65 
C4S   1    0.441475    0.618668    0.087538    10.50000    0.01940    0.04846 = 
         0.01798    0.00011    0.00402   -0.00404 
C5S   1    0.437929    0.821741    0.075369    10.50000    0.03063    0.03884 = 
         0.02504   -0.01039    0.01197   -0.00331 
AFIX  43 
H5S   2    0.439960    0.905518    0.122403    10.50000   -1.20000 
AFIX  65 
C6S   1    0.431410    0.902238   -0.005619    10.50000    0.02674    0.02715 = 
         0.03151   -0.00847    0.00895   -0.00048 
AFIX  43 
H6S   2    0.428987    1.041030   -0.013936    10.50000   -1.20000 
PART 2 
AFIX   0 
S2    5    0.399400    0.880331   -0.111480    10.50000    0.02075    0.02063 = 
         0.01434   -0.00206    0.00523    0.00235 
O5X   4    0.380863    0.740790   -0.069842    10.50000    0.02137    0.03537 = 
         0.01620    0.00321    0.00796    0.00377 
O6X   4    0.413977    1.074311   -0.073345    10.50000    0.02810    0.02214 = 
         0.02308   -0.00631    0.00521    0.00248 
O7X   4    0.606813    0.614230   -0.136034    10.50000    0.03139    0.05933 = 
         0.06019   -0.02012    0.02671   -0.00973 
O8X   4    0.580953    0.331332   -0.117037    10.50000    0.04206    0.04260 = 
         0.09854   -0.01991    0.04178    0.00013 
N3X   3    0.576466    0.506291   -0.125352    10.50000    0.01434    0.06834 = 
         0.04039   -0.02918    0.01185   -0.01107 
AFIX  66 
C1X   1    0.450866    0.772585   -0.116572    10.50000    0.01796    0.01962 = 
         0.00296   -0.00048   -0.00254    0.00250 
C2X   1    0.455404    0.568582   -0.114933    10.50000    0.01901    0.02248 = 
         0.01515   -0.00435    0.00775   -0.00838 
AFIX  43 
H2X   2    0.430284    0.488316   -0.111150    10.50000   -1.20000 
AFIX  65 
C3X   1    0.496699    0.482021   -0.118829    10.50000    0.01772    0.02589 = 
         0.02309   -0.01172    0.00593   -0.00585 
AFIX  43 
H3X   2    0.499800    0.342594   -0.117708    10.50000   -1.20000 
AFIX  65 
C4X   1    0.533454    0.599462   -0.124364    10.50000    0.01393    0.04000 = 
         0.02751   -0.01052    0.00828    0.00309 
C5X   1    0.528916    0.803465   -0.126003    10.50000    0.02627    0.04005 = 
         0.02290   -0.00271    0.01123   -0.00289 
AFIX  43 
H5X   2    0.554037    0.883729   -0.129786    10.50000   -1.20000 
AFIX  65 
C6X   1    0.487623    0.890028   -0.122107    10.50000    0.02299    0.01999 = 
         0.02522   -0.00203    0.00789    0.00107 
AFIX  43 
H6X   2    0.484521    1.029455   -0.123228    10.50000   -1.20000 
PART 0 
AFIX   0 
S3    5    0.271366    0.333152   -0.263435    11.00000    0.03032    0.01436 = 
         0.01952   -0.00259    0.01137    0.00161 
O2    4    0.157769    0.722188   -0.521481    11.00000    0.02927    0.04099 = 
         0.01760    0.00769    0.00618   -0.00040 
O1    4    0.126008    1.022529   -0.522426    11.00000    0.07089    0.05157 = 
         0.05630    0.01460    0.01358    0.03095 
O3    4    0.237258    0.196191   -0.328216    11.00000    0.03854    0.01755 = 
         0.02345   -0.00660    0.01531   -0.00494 
O4    4    0.324673    0.303203   -0.234148    11.00000    0.03243    0.01848 = 
         0.03626   -0.00115    0.01348    0.00510 
N1    3    0.254281    0.554020   -0.303166    11.00000    0.02445    0.01517 = 
         0.01382   -0.00142    0.00718    0.00213 
N2    3    0.361802    0.914963   -0.226815    11.00000    0.02423    0.02124 = 
         0.05805    0.00055   -0.00640    0.00109 
PART 2 
H2N   2    0.359168    1.031484   -0.254294    10.50000   -1.20000 
PART 1 
H2M   2    0.344679    1.024787   -0.227481    10.50000   -1.20000 
PART 0 
C1    1    0.228682    0.583882   -0.401681    11.00000    0.02447    0.01834 = 
         0.01632   -0.00146    0.00877    0.00179 
AFIX  13 
H1    2    0.213200    0.455802   -0.430697    11.00000   -1.20000 
AFIX   0 
C2    1    0.267377    0.643597   -0.434283    11.00000    0.02797    0.02766 = 
         0.02557   -0.00226    0.01804   -0.00157 
AFIX  23 
H2A   2    0.287466    0.526139   -0.432832    11.00000   -1.20000 
H2B   2    0.249051    0.687641   -0.497480    11.00000   -1.20000 
AFIX   0 
C3    1    0.303232    0.806605   -0.379276    11.00000    0.02713    0.01925 = 
         0.04073    0.00213    0.01815   -0.00008 
AFIX  23 
H3A   2    0.284317    0.931550   -0.388648    11.00000   -1.20000 
H3B   2    0.329422    0.826095   -0.399551    11.00000   -1.20000 
AFIX   0 
C4    1    0.328408    0.753501   -0.279251    11.00000    0.02132    0.01350 = 
         0.04192   -0.00309    0.00363    0.00338 
AFIX  13 
H4    2    0.349147    0.631881   -0.270196    11.00000   -1.20000 
AFIX   0 
C5    1    0.288367    0.711990   -0.249789    11.00000    0.02998    0.01324 = 
         0.01742   -0.00159    0.00298    0.00254 
AFIX  23 
H5A   2    0.304716    0.673634   -0.185679    11.00000   -1.20000 
H5B   2    0.268592    0.833376   -0.255988    11.00000   -1.20000 
AFIX   0 
C6    1    0.262342    0.332169   -0.166678    11.00000    0.04556    0.01303 = 
         0.01771   -0.00341    0.01635   -0.00139 
C7    1    0.213876    0.340966   -0.176831    11.00000    0.05506    0.03292 = 
         0.02719   -0.00338    0.02383    0.00129 
AFIX  43 
H7    2    0.185977    0.348746   -0.234899    11.00000   -1.20000 
AFIX   0 
C8    1    0.206444    0.338275   -0.100684    11.00000    0.07932    0.03208 = 
         0.04607    0.00434    0.04645    0.00813 
AFIX  43 
H8    2    0.173073    0.341826   -0.107006    11.00000   -1.20000 
AFIX   0 
C9    1    0.246853    0.330504   -0.015721    11.00000    0.10597    0.01122 = 
         0.03027   -0.00119    0.04131   -0.00443 
C10   1    0.294572    0.321545   -0.008009    11.00000    0.08688    0.02653 = 
         0.01980    0.00490    0.01481   -0.01035 
AFIX  43 
H10   2    0.322458    0.315433    0.050129    11.00000   -1.20000 
AFIX   0 
C11   1    0.303492    0.321114   -0.082669    11.00000    0.05232    0.02057 = 
         0.02434    0.00427    0.00945   -0.00787 
AFIX  43 
H11   2    0.336848    0.313457   -0.076237    11.00000   -1.20000 
AFIX   0 
C12   1    0.237836    0.327821    0.066707    11.00000    0.16439    0.01729 = 
         0.04671    0.00500    0.07062    0.00343 
AFIX 137 
H12A  2    0.256546    0.218158    0.105796    11.00000   -1.50000 
H12B  2    0.201722    0.311241    0.048087    11.00000   -1.50000 
H12C  2    0.249425    0.452335    0.099394    11.00000   -1.50000 
AFIX   0 
C13   1    0.186063    0.734388   -0.424386    11.00000    0.02387    0.02553 = 
         0.01652   -0.00074    0.00549   -0.00255 
AFIX  13 
H13   2    0.200405    0.869661   -0.406019    11.00000   -1.20000 
AFIX   0 
C14   1    0.152593    0.684442   -0.382206    11.00000    0.02562    0.03607 = 
         0.02209    0.00634    0.01100    0.00809 
C15   1    0.124375    0.512209   -0.404705    11.00000    0.02932    0.04998 = 
         0.04051    0.00829    0.01682   -0.00132 
AFIX  43 
H15   2    0.125782    0.423748   -0.447534    11.00000   -1.20000 
AFIX   0 
C16   1    0.093939    0.471110   -0.363451    11.00000    0.03550    0.07209 = 
         0.06887    0.01665    0.02697   -0.00555 
AFIX  43 
H16   2    0.074546    0.353410   -0.378123    11.00000   -1.20000 
AFIX   0 
C17   1    0.091727    0.599540   -0.301632    11.00000    0.05820    0.09618 = 
         0.06859    0.01737    0.05058    0.00937 
AFIX  43 
H17   2    0.070611    0.570386   -0.274362    11.00000   -1.20000 
AFIX   0 
C18   1    0.119573    0.767926   -0.279325    11.00000    0.05714    0.09372 = 
         0.06089    0.00030    0.04278    0.01441 
AFIX  43 
H18   2    0.118401    0.855037   -0.235849    11.00000   -1.20000 
AFIX   0 
C19   1    0.149418    0.811295   -0.320059    11.00000    0.03861    0.05271 = 
         0.04087    0.00291    0.02261    0.01356 
AFIX  43 
H19   2    0.168219    0.930473   -0.305324    11.00000   -1.20000 
AFIX   0 
C20   1    0.126219    0.876511   -0.561588    11.00000    0.02925    0.06317 = 
         0.02931    0.01883    0.01013    0.00722 
C21   1    0.092911    0.827860   -0.658619    11.00000    0.03790    0.11243 = 
         0.02764    0.03267    0.00835    0.01347 
AFIX 137 
H21A  2    0.072761    0.943733   -0.689161    11.00000   -1.50000 
H21B  2    0.070407    0.718802   -0.662558    11.00000   -1.50000 
H21C  2    0.113868    0.789351   -0.687345    11.00000   -1.50000 
AFIX   0 
HKLF 4 1 1 0 0 0 1 0 0 0 1 
  
REM  mo_D412_0m in C2 
REM R1 =  0.0536 for    5388 Fo > 4sig(Fo)  and  0.0826 for all    6898 data 
REM    473 parameters refined using      6 restraints 
  
END 
  
WGHT      0.0366      4.6304 
  
REM Instructions for potential hydrogen bonds 
HTAB C1M O1_$1 
HTAB N2 O4_$2 
HTAB N2 S3_$2 
HTAB N2 O4_$2 
HTAB C1 O3 
HTAB C4 O4 
HTAB C5 O5X 
HTAB C13 O3_$2 
HTAB C21 O5S_$3 
  
REM Highest difference peak  0.579,  deepest hole -0.329,  1-sigma level  0.055 
Q1    1   0.5000  0.6011  0.5000  10.50000  0.05    0.47 
Q2    1   0.4636  0.5143  0.4611  11.00000  0.05    0.29 
Q3    1   0.1280  0.8246 -0.5870  11.00000  0.05    0.28 
Q4    1   0.4279  0.8536 -0.1235  11.00000  0.05    0.27 
Q5    1   0.3020  0.3238 -0.2473  11.00000  0.05    0.26 
Q6    1   0.1308  0.9851 -0.5574  11.00000  0.05    0.26 
Q7    1   0.1635  0.7166 -0.4130  11.00000  0.05    0.22 
Q8    1   0.5217  0.8217  0.4394  11.00000  0.05    0.21 
Q9    1   0.5004  0.2268  0.4632  11.00000  0.05    0.20 
Q10   1   0.2427  0.6472 -0.4327  11.00000  0.05    0.20 
Q11   1   0.3063  1.0068 -0.4002  11.00000  0.05    0.20 
Q12   1   0.2406  0.5655 -0.3548  11.00000  0.05    0.20 
Q13   1   0.5272  0.3200  0.4390  11.00000  0.05    0.20 
Q14   1   0.3640  0.8872 -0.2003  11.00000  0.05    0.19 
Q15   1   0.2719  0.2014 -0.1005  11.00000  0.05    0.19 
Q16   1   0.3255  0.3259 -0.3061  11.00000  0.05    0.19 
Q17   1   0.2809  0.3359 -0.2079  11.00000  0.05    0.19 
Q18   1   0.3776  0.4213 -0.1223  11.00000  0.05    0.19 
Q19   1   0.1374  0.5323 -0.2326  11.00000  0.05    0.19 
Q20   1   0.2235  0.5519 -0.3040  11.00000  0.05    0.19 
; 
_shelx_res_checksum   49743 
  
_shelx_hkl_file 
; 
   4   0   0   51.57    1.05 
   4   0   0   51.52    1.08 
   4   0   0   50.07    1.04 
   4   0   0   50.29    1.10 
  -4   0   0   48.56    1.03 
  -4   0   0   51.96    1.15 
  -4   0   0   51.47    1.09 
  -4   0   0   52.98    1.11 
  -4   0   0   51.06    1.08 
  -4   0   0   50.73    1.05 
   6   0   0  559.33    9.13 
   6   0   0  575.66    9.22 
   6   0   0  586.96    9.21 
   6   0   0  566.94    8.87 
   6   0   0  579.63    8.88 
   6   0   0  543.54    9.05 
  -6   0   0  592.02    9.25 
  -6   0   0  567.55    9.16 
  -6   0   0  573.05    9.04 
  -6   0   0  572.91    8.90 
  -6   0   0  509.01    8.84 
  -6   0   0  573.31    9.18 
   8   0   0    3.51    0.40 
   8   0   0    3.98    0.50 
  -8   0   0    3.64    0.44 
   8   0   0    4.65    0.43 
   8   0   0    4.01    0.49 
   8   0   0    4.10    0.46 
  -8   0   0    3.87    0.50 
  -8   0   0    3.97    0.40 
  -8   0   0    3.91    0.51 
   8   0   0    3.85    0.51 
  -8   0   0    3.87    0.43 
  10   0   0   26.06    0.96 
  10   0   0   26.64    1.07 
  10   0   0   28.69    1.12 
  10   0   0   26.41    1.12 
  10   0   0   25.88    1.05 
 -10   0   0   28.14    0.98 
 -10   0   0   27.24    1.19 
 -10   0   0   27.12    1.04 
 -10   0   0   28.67    0.97 
  10   0   0   27.86    0.95 
 -10   0   0   25.80    1.07 
 -12   0   0   14.01    1.02 
 -12   0   0   14.21    0.90 
 -12   0   0   14.21    0.80 
  12   0   0   15.12    1.01 
 -12   0   0   13.57    0.80 
  12   0   0   14.42    0.93 
  12   0   0   14.42    0.96 
  12   0   0   14.04    0.82 
 -12   0   0   12.56    0.93 
  12   0   0   14.52    0.94 
  12   0   0   13.61    0.76 
  14   0   0    6.72    0.85 
  14   0   0    6.55    0.69 
 -14   0   0    6.69    0.81 
  14   0   0    7.58    0.82 
 -14   0   0    6.85    0.77 
 -14   0   0    6.11    0.87 
  14   0   0    5.99    0.79 
  14   0   0    7.62    0.90 
  14   0   0    7.34    0.87 
 -14   0   0    6.29    0.79 
 -16   0   0    3.48    0.79 
 -16   0   0    4.52    0.75 
 -16   0   0    4.84    0.93 
  16   0   0    3.88    0.81 
 -16   0   0    3.63    0.66 
  16   0   0    4.37    0.82 
  16   0   0    4.30    0.86 
  16   0   0    4.36    0.62 
  16   0   0    4.48    0.72 
  16   0   0    4.41    0.75 
  18   0   0    5.03    0.84 
 -18   0   0    5.32    1.04 
  18   0   0    6.18    1.04 
 -18   0   0    5.94    1.06 
 -18   0   0    5.85    0.92 
  18   0   0    5.92    0.94 
  18   0   0    5.66    0.80 
  18   0   0    5.66    0.85 
  18   0   0    5.88    1.08 
 -18   0   0    5.92    0.88 
  20   0   0    4.58    0.90 
  20   0   0    4.27    0.99 
 -20   0   0    5.50    1.15 
  20   0   0    4.38    1.20 
 -20   0   0    2.30    1.05 
  20   0   0    4.95    0.96 
 -20   0   0    4.80    0.95 
  20   0   0    3.81    0.85 
  20   0   0    4.80    0.92 
 -20   0   0    4.19    0.97 
 -22   0   0    5.61    1.32 
  22   0   0    8.06    1.40 
  22   0   0    5.74    1.18 
  22   0   0    5.37    1.29 
  22   0   0    7.46    1.33 
 -22   0   0    5.31    1.11 
 -22   0   0    6.81    1.44 
  22   0   0    6.46    1.13 
 -22   0   0    5.74    1.09 
  22   0   0    3.71    0.94 
  24   0   0    0.59    1.08 
 -24   0   0    1.93    1.23 
 -24   0   0    1.11    1.24 
  24   0   0    0.62    1.32 
 -24   0   0    1.36    1.31 
  24   0   0    0.77    0.96 
  24   0   0    4.50    1.46 
  24   0   0    1.79    1.49 
 -24   0   0    2.65    1.36 
  24   0   0    1.42    1.09 
  26   0   0    6.92    1.28 
 -26   0   0    5.53    1.46 
  26   0   0    6.73    1.40 
  26   0   0    7.60    1.99 
 -26   0   0    5.91    1.46 
  26   0   0    5.80    1.49 
 -26   0   0    5.48    1.76 
 -26   0   0    8.61    1.76 
  28   0   0   10.47    2.23 
 -28   0   0    5.97    2.00 
  28   0   0    7.33    1.70 
  28   0   0    9.41    1.73 
 -28   0   0    8.26    2.15 
  28   0   0    8.94    1.57 
 -28   0   0    5.79    2.39 
  30   0   0    2.50    1.90 
  30   0   0    0.48    1.67 
  30   0   0    6.07    1.95 
  30   0   0    4.57    2.80 
 -30   0   0    2.49    2.10 
 -30   0   0    6.46    2.47 
  32   0   0    2.02    2.43 
 -32   0   0   -0.84    2.78 
  32   0   0    2.72    2.09 
  32   0   0    2.17    2.73 
  32   0   0    0.95    2.12 
 -32   0   0    1.48    2.66 
 -34   0   0    2.11    3.44 
  34   0   0    1.04    2.46 
  34   0   0   -5.05    2.63 
  34   0   0   -2.56    2.97 
 -34   0   0   -1.02    3.30 
   1  -1   0   54.16    1.11 
  -1  -1   0   64.14    1.32 
   1  -1   0   60.03    1.11 
   1  -1   0   63.82    1.16 
   1  -1   0   64.24    1.20 
  -1  -1   0   62.81    1.32 
   1  -1   0   62.51    1.34 
  -1   1   0   62.83    1.20 
   1   1   0   59.11    1.29 
  -1   1   0   60.06    1.10 
  -1   1   0   59.73    1.18 
   1   1   0   50.78    1.26 
  -1   1   0   60.98    1.15 
  -1   1   0   62.38    1.14 
   3  -1   0  300.75    4.84 
   3  -1   0  301.07    5.00 
   3  -1   0  322.73    5.04 
  -3  -1   0  302.59    4.80 
  -3  -1   0  321.32    5.22 
   3  -1   0  303.62    5.08 
   3  -1   0  303.66    4.79 
   3   1   0  304.92    4.80 
   3   1   0  300.17    5.19 
  -3   1   0  308.52    4.80 
  -3   1   0  302.70    5.01 
  -3   1   0  306.21    4.95 
  -3   1   0  255.73    4.80 
  -3   1   0  307.57    5.06 
   5  -1   0   96.78    2.04 
  -5  -1   0   99.21    1.87 
  -5  -1   0   96.79    2.10 
   5  -1   0   99.08    2.11 
   5  -1   0  100.00    1.98 
   5  -1   0   97.84    2.00 
   5  -1   0  104.45    2.00 
  -5  -1   0  101.92    1.95 
  -5  -1   0   99.77    2.16 
  -5   1   0  102.31    2.05 
   5   1   0  103.85    1.94 
  -5   1   0  101.67    1.98 
   5   1   0  103.30    2.17 
  -5   1   0  104.38    1.95 
   5   1   0  101.80    1.89 
  -5   1   0   99.51    2.02 
   5   1   0  100.00    2.08 
   5   1   0  104.89    1.89 
   7  -1   0  132.85    2.52 
   7  -1   0  128.05    2.57 
   7  -1   0  126.55    2.63 
  -7  -1   0  128.16    2.71 
   7  -1   0  129.67    2.57 
  -7  -1   0  127.15    2.56 
  -7  -1   0  128.13    2.45 
  -7  -1   0  126.98    2.65 
   7  -1   0  127.88    2.71 
  -7   1   0  132.25    2.47 
   7   1   0  129.45    2.48 
  -7   1   0  129.43    2.61 
  -7   1   0  129.61    2.57 
  -7   1   0  130.14    2.63 
   7   1   0  125.77    2.70 
   7   1   0  128.19    2.44 
   7   1   0  127.13    2.51 
   7   1   0  128.17    2.61 
  -7   1   0  128.65    2.77 
   9  -1   0    3.64    0.45 
   9  -1   0    3.73    0.52 
   9  -1   0    3.52    0.53 
  -9  -1   0    4.32    0.47 
   9  -1   0    4.09    0.56 
  -9  -1   0    2.80    0.46 
  -9  -1   0    4.37    0.53 
   9  -1   0    3.02    0.48 
  -9  -1   0    3.96    0.55 
  -9  -1   0    4.08    0.53 
   9  -1   0    2.86    0.35 
   9   1   0    3.88    0.55 
   9   1   0    3.35    0.46 
   9   1   0    4.07    0.50 
   9   1   0    3.45    0.46 
   9   1   0    3.80    0.45 
   9   1   0    3.65    0.50 
  -9   1   0    3.40    0.42 
  -9   1   0    3.39    0.46 
  -9   1   0    3.34    0.50 
  -9   1   0    4.70    0.68 
  -9   1   0    3.32    0.52 
 -11  -1   0   56.42    1.66 
 -11  -1   0   57.44    1.80 
 -11  -1   0   58.29    1.64 
 -11  -1   0   58.17    1.73 
  11  -1   0   58.04    1.73 
 -11  -1   0   57.74    1.76 
  11  -1   0   58.66    1.58 
  11  -1   0   57.52    1.36 
  11  -1   0   58.32    1.78 
  11  -1   0   57.94    1.73 
  11  -1   0   59.96    1.90 
  11   1   0   60.18    1.66 
  11   1   0   58.87    1.65 
 -11   1   0   60.09    1.79 
 -11   1   0   62.31    1.57 
 -11   1   0   58.17    1.79 
 -11   1   0   61.54    1.77 
  11   1   0   61.62    1.81 
  11   1   0   60.45    1.68 
  11   1   0   60.39    1.73 
  11   1   0   60.99    1.75 
  13  -1   0   19.20    0.84 
  13  -1   0   17.26    1.09 
  13  -1   0   19.40    1.25 
 -13  -1   0   17.72    1.09 
 -13  -1   0   17.70    1.19 
 -13  -1   0   20.10    1.11 
 -13  -1   0   19.83    1.04 
  13  -1   0   18.54    1.12 
  13  -1   0   18.42    1.12 
 -13  -1   0   19.56    1.09 
  13  -1   0   18.05    0.93 
  13   1   0   17.90    1.09 
 -13   1   0   18.88    0.93 
 -13   1   0   17.02    1.13 
  13   1   0   16.97    1.08 
  13   1   0   18.68    0.99 
 -13   1   0   18.75    1.18 
  13   1   0   19.38    1.13 
  13   1   0   20.46    1.09 
  13   1   0   18.80    1.08 
 -13   1   0   17.35    1.08 
 -13   1   0   20.29    1.34 
 -15  -1   0   28.28    1.40 
  15  -1   0   26.79    1.42 
  15  -1   0   27.92    1.54 
 -15  -1   0   27.97    1.34 
 -15  -1   0   28.47    1.40 
  15  -1   0   27.50    1.22 
 -15  -1   0   28.39    1.51 
  15  -1   0   28.61    1.49 
 -15  -1   0   27.52    1.43 
  15  -1   0   27.49    1.12 
  15  -1   0   28.89    1.45 
  15   1   0   28.42    1.45 
 -15   1   0   27.27    1.53 
  15   1   0   29.45    1.37 
  15   1   0   27.67    1.42 
 -15   1   0   29.58    1.72 
 -15   1   0   27.47    1.18 
 -15   1   0   27.43    1.53 
  15   1   0   25.76    1.42 
  15   1   0   29.73    1.45 
  15   1   0   28.62    1.26 
 -15   1   0   28.94    1.41 
 -17  -1   0   51.26    1.99 
 -17  -1   0   55.43    2.02 
 -17  -1   0   53.78    1.93 
  17  -1   0   56.07    2.12 
  17  -1   0   50.31    1.64 
  17  -1   0   57.50    2.28 
  17  -1   0   52.79    2.06 
  17  -1   0   53.04    1.83 
 -17  -1   0   55.53    2.24 
 -17  -1   0   51.88    2.05 
  17  -1   0   53.38    2.11 
 -17   1   0   53.09    2.38 
  17   1   0   54.67    1.86 
 -17   1   0   48.90    2.14 
 -17   1   0   51.36    1.78 
 -17   1   0   53.69    2.04 
  17   1   0   53.03    2.10 
  17   1   0   50.83    2.03 
  17   1   0   52.43    2.08 
  17   1   0   54.80    2.07 
  17   1   0   55.73    2.05 
 -19  -1   0    3.87    0.99 
  19  -1   0    4.43    1.19 
 -19  -1   0    4.70    1.01 
 -19  -1   0    4.38    0.98 
  19  -1   0    5.05    0.84 
  19  -1   0    4.28    1.12 
  19  -1   0    6.04    1.08 
  19  -1   0    4.83    0.78 
  19  -1   0    4.76    0.96 
 -19  -1   0    5.50    0.95 
 -19  -1   0    5.63    0.93 
 -19   1   0    5.22    1.15 
 -19   1   0    3.26    0.82 
  19   1   0    4.80    1.09 
  19   1   0    4.68    0.82 
  19   1   0    3.95    0.95 
  19   1   0    5.04    0.95 
  19   1   0    4.85    1.05 
 -19   1   0    6.59    0.93 
  19   1   0    4.93    1.03 
 -19   1   0    4.44    1.06 
  21  -1   0    6.26    1.32 
  21  -1   0    7.35    1.23 
 -21  -1   0    4.42    1.11 
  21  -1   0    6.29    0.98 
  21  -1   0    6.07    1.18 
  21  -1   0    6.27    1.04 
  21  -1   0    4.75    1.19 
 -21  -1   0    5.28    1.07 
 -21  -1   0    5.89    1.27 
 -21   1   0    5.27    1.02 
  21   1   0    6.66    1.29 
 -21   1   0    7.66    1.43 
  21   1   0    5.50    1.13 
 -21   1   0    7.44    1.32 
  21   1   0    5.15    1.10 
  21   1   0    4.05    0.87 
  21   1   0    4.96    1.08 
  21   1   0    8.06    1.19 
 -21   1   0    5.71    1.08 
  23  -1   0    1.49    1.28 
  23  -1   0    2.48    0.98 
 -23  -1   0    1.08    1.26 
  23  -1   0    0.97    1.23 
 -23  -1   0    2.71    1.23 
 -23  -1   0    1.31    1.24 
  23  -1   0    0.18    0.85 
  23  -1   0    1.98    1.11 
 -23   1   0    0.46    1.03 
  23   1   0    1.97    1.15 
 -23   1   0    3.28    1.32 
 -23   1   0    0.74    1.36 
  23   1   0    1.63    1.18 
  23   1   0    2.60    1.35 
 -23   1   0    0.07    1.03 
  23   1   0    1.61    0.89 
  23   1   0    0.41    1.02 
  25  -1   0    7.08    1.45 
  25  -1   0    7.06    1.25 
  25  -1   0    8.34    1.27 
  25  -1   0    9.70    1.76 
 -25  -1   0    8.40    1.62 
 -25  -1   0    5.72    1.62 
  25  -1   0    7.04    1.94 
 -25  -1   0    6.45    1.71 
 -25   1   0    4.80    1.75 
  25   1   0    5.59    1.72 
  25   1   0    4.94    1.43 
 -25   1   0    8.00    1.54 
  25   1   0    7.78    1.59 
  25   1   0    7.31    1.46 
 -25   1   0    7.87    1.44 
  25   1   0    6.79    1.21 
 -25   1   0    8.93    1.76 
  27  -1   0    7.79    1.64 
 -27  -1   0    3.33    1.75 
  27  -1   0    5.76    1.51 
  27  -1   0    3.10    1.87 
 -27  -1   0    4.22    1.69 
  27  -1   0    5.14    1.55 
  27  -1   0    2.49    1.26 
  27  -1   0    4.01    2.01 
 -27  -1   0    2.82    2.03 
 -27   1   0    2.70    1.95 
  27   1   0    2.64    1.81 
  27   1   0    1.68    1.63 
 -27   1   0    3.81    1.59 
  27   1   0    3.56    1.40 
  27   1   0    1.11    2.03 
  27   1   0    2.81    1.49 
 -27   1   0    5.29    1.84 
  29  -1   0   24.81    2.64 
  29  -1   0   23.10    2.49 
  29  -1   0   26.81    3.13 
  29  -1   0   22.99    2.65 
 -29  -1   0   29.60    3.60 
  29  -1   0   28.39    2.68 
 -29  -1   0   22.76    2.97 
 -29   1   0   18.12    2.75 
  29   1   0   25.65    3.11 
 -29   1   0   22.71    2.62 
 -29   1   0   30.76    3.61 
  29   1   0   24.79    2.51 
  29   1   0   22.49    2.52 
  29   1   0   24.72    2.88 
  31  -1   0    5.12    1.83 
  31  -1   0    2.73    2.33 
 -31  -1   0    5.60    2.69 
  31  -1   0    4.52    2.47 
 -31  -1   0    5.00    2.64 
  31  -1   0    7.72    2.12 
  31   1   0    5.71    2.31 
 -31   1   0    1.45    2.48 
 -31   1   0    0.97    2.73 
  31   1   0    5.11    2.00 
  31   1   0    5.76    2.84 
  33  -1   0    1.03    2.75 
  33  -1   0    4.19    2.66 
  33  -1   0   -1.64    2.65 
 -33  -1   0   -1.70    3.12 
 -33  -1   0    4.04    3.13 
 -33  -1   0   -5.96    2.80 
  33   1   0   -0.47    2.68 
  33   1   0    6.48    2.44 
 -33   1   0    1.77    3.00 
  33   1   0    4.90    2.94 
  33   1   0   -1.86    3.50 
  33   1   0    2.94    2.72 
 -33   1   0    2.89    3.47 
  35  -1   0   -6.10    3.15 
 -35  -1   0   -1.56    3.52 
  35  -1   0    7.97    3.10 
 -35   1   0    8.08    3.88 
  35   1   0   -3.80    3.12 
  35   1   0    4.94    2.91 
   0  -2   0 1000.00   15.69 
   0  -2   0  952.50   15.45 
   0   2   0  965.03   15.47 
   0   2   0  971.33   15.66 
   2  -2   0  599.12    9.49 
   2  -2   0  619.67    9.30 
   2  -2   0  597.34    9.22 
  -2  -2   0  590.16    9.84 
  -2  -2   0  606.84   10.06 
   2  -2   0  596.05    9.92 
   2  -2   0  603.95    9.54 
  -2   2   0  610.07    9.32 
  -2   2   0  609.95    9.59 
  -2   2   0  618.39    9.49 
   2   2   0  583.12    9.86 
   2   2   0  604.92   10.04 
  -2   2   0  585.08    9.84 
  -2   2   0  591.47    9.74 
  -2   2   0  588.34    9.18 
   4  -2   0   36.97    1.06 
   4  -2   0   39.32    1.32 
   4  -2   0   37.44    1.15 
   4  -2   0   38.48    1.10 
   4  -2   0   38.87    1.09 
  -4  -2   0   39.52    1.30 
   4   2   0   38.67    1.28 
  -4   2   0   38.25    1.11 
  -4   2   0   39.64    1.10 
  -4   2   0   37.66    1.17 
  -4   2   0   38.02    1.25 
  -4   2   0   37.80    1.12 
  -4   2   0   38.64    1.05 
   4   2   0   38.57    1.32 
   6  -2   0   49.37    1.48 
  -6  -2   0   49.32    1.22 
   6  -2   0   50.99    1.41 
   6  -2   0   49.16    1.42 
  -6  -2   0   48.03    1.58 
   6  -2   0   51.85    1.56 
   6  -2   0   48.76    1.33 
  -6   2   0   51.72    1.55 
  -6   2   0   51.85    1.43 
  -6   2   0   53.24    1.37 
   6   2   0   49.97    1.21 
  -6   2   0   51.16    1.36 
   6   2   0   50.54    1.52 
   6   2   0   51.18    1.60 
  -6   2   0   51.97    1.42 
   8  -2   0   54.38    1.71 
  -8  -2   0   55.03    1.45 
   8  -2   0   56.48    1.57 
   8  -2   0   55.16    1.60 
   8  -2   0   54.96    1.62 
   8  -2   0   57.52    1.58 
  -8  -2   0   55.73    1.40 
  -8  -2   0   55.62    1.79 
   8  -2   0   56.92    1.69 
  -8  -2   0   53.82    1.39 
   8   2   0   55.91    1.66 
  -8   2   0   55.42    1.55 
   8   2   0   55.33    1.42 
   8   2   0   52.65    1.34 
  -8   2   0   57.00    1.80 
  -8   2   0   55.24    1.59 
   8   2   0   53.89    1.75 
  -8   2   0   55.18    1.64 
  -8   2   0   55.85    1.46 
  10  -2   0   70.18    2.00 
  10  -2   0   68.45    1.96 
 -10  -2   0   66.26    2.08 
 -10  -2   0   70.34    1.77 
  10  -2   0   69.50    1.50 
  10  -2   0   69.36    1.89 
  10  -2   0   69.05    2.08 
 -10  -2   0   68.54    1.77 
 -10  -2   0   69.78    1.85 
 -10  -2   0   70.47    2.12 
  10  -2   0   68.99    1.92 
  10   2   0   67.98    2.10 
  10   2   0   69.49    1.76 
 -10   2   0   70.37    2.18 
  10   2   0   69.62    1.74 
  10   2   0   68.39    1.96 
  10   2   0   71.07    1.81 
 -10   2   0   68.84    2.00 
 -10   2   0   71.27    1.75 
 -10   2   0   70.58    1.96 
 -10   2   0   69.59    1.94 
 -12  -2   0    4.76    0.82 
  12  -2   0    2.97    0.59 
  12  -2   0    3.51    0.71 
  12  -2   0    2.83    0.69 
  12  -2   0    3.71    0.48 
 -12  -2   0    3.86    0.58 
  12  -2   0    3.16    0.68 
 -12  -2   0    3.68    0.61 
 -12  -2   0    4.07    0.60 
  12  -2   0    3.61    0.61 
 -12  -2   0    3.69    0.73 
  12   2   0    3.34    0.69 
  12   2   0    4.03    0.63 
 -12   2   0    2.94    0.66 
  12   2   0    4.63    0.68 
 -12   2   0    3.19    0.76 
 -12   2   0    3.90    0.70 
 -12   2   0    3.91    0.71 
 -12   2   0    4.39    0.57 
  12   2   0    3.40    0.59 
  12   2   0    3.32    0.60 
  12   2   0    4.01    0.68 
  14  -2   0   15.91    1.18 
 -14  -2   0   14.98    1.08 
  14  -2   0   15.69    1.10 
  14  -2   0   12.10    1.21 
  14  -2   0   14.32    1.20 
 -14  -2   0   15.26    1.26 
 -14  -2   0   15.60    1.15 
  14  -2   0   15.56    1.37 
 -14  -2   0   14.33    1.22 
 -14  -2   0   14.76    1.26 
  14   2   0   14.15    1.15 
  14   2   0   15.58    1.05 
  14   2   0   14.83    1.13 
 -14   2   0   16.20    1.19 
 -14   2   0   16.80    0.98 
 -14   2   0   15.48    1.30 
  14   2   0   16.88    1.15 
  14   2   0   14.82    1.10 
 -14   2   0   16.54    1.46 
 -14   2   0   13.27    1.10 
  14   2   0   13.89    1.25 
 -16  -2   0    7.10    0.94 
 -16  -2   0    7.45    1.04 
  16  -2   0    8.20    1.13 
  16  -2   0    7.45    1.06 
  16  -2   0   11.23    1.32 
  16  -2   0    8.48    1.09 
  16  -2   0    7.64    0.96 
 -16  -2   0    6.34    1.02 
 -16  -2   0    7.83    0.97 
  16   2   0    5.78    0.86 
 -16   2   0    7.37    0.93 
 -16   2   0    7.82    1.07 
 -16   2   0    7.44    1.17 
  16   2   0    8.88    1.04 
  16   2   0    7.07    0.91 
 -16   2   0    7.66    1.07 
 -16   2   0    8.16    0.93 
  16   2   0    6.88    1.01 
  16   2   0    8.15    0.99 
  16   2   0    6.95    0.94 
 -18  -2   0   11.78    1.26 
 -18  -2   0   11.27    1.48 
 -18  -2   0   11.13    1.47 
  18  -2   0   12.25    1.49 
  18  -2   0   12.62    1.16 
  18  -2   0   11.44    1.27 
  18  -2   0   13.92    1.41 
  18  -2   0   13.68    1.72 
  18  -2   0   11.26    1.32 
 -18  -2   0   11.52    1.51 
  18   2   0   11.96    1.44 
  18   2   0   11.54    1.43 
  18   2   0   12.35    1.43 
 -18   2   0   11.48    1.52 
  18   2   0   12.25    1.32 
 -18   2   0   10.53    1.35 
 -18   2   0   12.68    1.54 
  18   2   0   13.32    1.29 
 -18   2   0   11.68    1.10 
  18   2   0   12.41    1.21 
 -18   2   0   10.84    1.40 
 -20  -2   0   12.14    1.44 
 -20  -2   0   11.91    1.39 
  20  -2   0   12.78    1.54 
  20  -2   0   13.76    1.64 
  20  -2   0   10.39    1.39 
 -20  -2   0   13.60    1.71 
  20  -2   0   13.36    1.79 
  20  -2   0   11.61    1.45 
  20  -2   0   13.80    1.63 
 -20  -2   0   11.61    1.44 
 -20   2   0   13.50    1.88 
 -20   2   0   11.23    1.51 
  20   2   0   14.29    1.37 
  20   2   0   11.81    1.36 
 -20   2   0   11.47    1.37 
 -20   2   0   10.15    1.15 
  20   2   0   14.30    1.74 
  20   2   0   12.44    1.40 
  20   2   0   11.23    1.34 
  20   2   0   13.01    1.58 
 -22  -2   0    3.59    1.24 
  22  -2   0    3.18    1.11 
  22  -2   0    4.29    1.21 
 -22  -2   0    5.02    1.36 
  22  -2   0    2.68    1.35 
 -22  -2   0    2.71    1.21 
  22  -2   0    4.36    1.21 
  22  -2   0    6.21    1.70 
 -22  -2   0    4.92    1.37 
  22  -2   0    4.38    1.33 
  22   2   0    4.78    1.15 
  22   2   0    4.32    1.37 
 -22   2   0    4.51    1.31 
  22   2   0    4.81    1.28 
  22   2   0    4.38    1.29 
  22   2   0    4.53    1.05 
 -22   2   0    5.60    1.38 
  22   2   0    4.36    1.27 
 -22   2   0    3.36    1.04 
 -22   2   0    5.71    1.64 
 -24  -2   0    5.06    1.56 
  24  -2   0    4.93    1.49 
  24  -2   0    4.96    1.84 
  24  -2   0    5.38    1.36 
  24  -2   0    6.31    1.40 
 -24  -2   0    3.95    1.44 
 -24  -2   0    7.02    1.63 
  24  -2   0    5.91    1.67 
 -24   2   0    6.20    1.60 
  24   2   0    6.41    1.28 
  24   2   0    2.25    1.50 
  24   2   0    2.86    1.42 
  24   2   0    5.12    1.53 
  24   2   0    6.66    1.46 
 -24   2   0    6.34    1.90 
 -24   2   0    5.76    1.27 
 -24   2   0    2.15    1.39 
  24   2   0    6.37    1.46 
 -26  -2   0    3.41    1.64 
  26  -2   0    3.61    1.72 
  26  -2   0    2.06    1.57 
  26  -2   0    4.92    1.44 
  26  -2   0    5.02    1.65 
 -26  -2   0    6.32    1.82 
 -26  -2   0    3.56    1.84 
 -26  -2   0    2.06    1.72 
  26  -2   0    5.71    2.03 
  26   2   0    2.37    1.30 
  26   2   0    4.10    1.80 
 -26   2   0    1.75    1.69 
 -26   2   0    2.56    1.91 
  26   2   0    2.68    1.68 
 -26   2   0    2.34    1.47 
  26   2   0    3.96    1.66 
  26   2   0    2.00    1.60 
  26   2   0    3.75    1.50 
  28  -2   0    2.48    1.85 
  28  -2   0    5.80    1.81 
 -28  -2   0    0.72    2.04 
  28  -2   0    1.00    2.19 
 -28  -2   0    3.73    2.05 
 -28  -2   0    2.01    1.93 
  28  -2   0    2.27    1.82 
  28   2   0    3.00    1.53 
  28   2   0   -0.09    1.59 
 -28   2   0    2.61    1.77 
  28   2   0    5.59    2.17 
 -28   2   0    5.29    2.19 
 -28   2   0   -0.35    2.33 
  30  -2   0    7.81    2.20 
 -30  -2   0    4.65    2.52 
  30  -2   0    4.16    2.19 
 -30  -2   0    5.21    2.55 
 -30  -2   0    5.89    2.50 
  30  -2   0    0.64    2.47 
  30   2   0    5.73    2.64 
  30   2   0    5.37    1.96 
 -30   2   0    6.60    2.57 
  30   2   0    1.78    2.03 
  30   2   0    2.71    2.29 
 -30   2   0    0.49    2.66 
  32  -2   0    4.60    2.55 
 -32  -2   0    3.57    3.20 
 -32  -2   0    1.71    3.07 
  32  -2   0    3.91    2.70 
 -32  -2   0   -1.89    2.78 
  32  -2   0   -0.94    2.65 
  32   2   0    2.09    3.28 
 -32   2   0    5.08    3.19 
  32   2   0    1.98    2.04 
 -32   2   0    3.03    2.94 
  32   2   0    4.01    2.55 
 -34  -2   0    2.23    3.50 
  34  -2   0    9.62    3.40 
 -34  -2   0    0.72    3.60 
  34  -2   0    6.94    3.24 
  34  -2   0   10.02    3.31 
  34   2   0    2.15    2.51 
  34   2   0    3.39    3.08 
 -34   2   0   -2.47    3.58 
  34   2   0    8.95    3.32 
 -34   2   0   10.60    3.74 
  -1  -3   0   32.80    1.27 
  -1  -3   0   32.80    1.46 
   1  -3   0   31.24    1.47 
   1  -3   0   32.79    1.19 
  -1   3   0   32.43    1.18 
  -1   3   0   32.89    1.09 
   1   3   0   31.77    1.23 
  -1   3   0   32.44    1.48 
   1   3   0   32.45    1.48 
  -1   3   0   32.48    0.97 
   3  -3   0   51.39    1.43 
   3  -3   0   53.85    1.46 
   3  -3   0   51.45    1.38 
   3  -3   0   50.93    1.43 
   3  -3   0   50.99    1.86 
   3  -3   0   51.83    1.39 
  -3  -3   0   51.36    1.70 
  -3   3   0   50.23    1.39 
  -3   3   0   52.48    1.50 
  -3   3   0   51.71    1.82 
  -3   3   0   50.10    1.35 
  -3   3   0   50.42    1.44 
   3   3   0   50.93    1.84 
  -3   3   0   51.12    1.33 
   3   3   0   49.99    1.69 
   5  -3   0   23.50    1.08 
  -5  -3   0   22.32    1.20 
   5  -3   0   22.99    1.02 
   5  -3   0   23.23    0.87 
   5  -3   0   23.43    1.32 
   5  -3   0   22.31    1.00 
   5  -3   0   23.26    1.00 
  -5   3   0   25.37    1.14 
  -5   3   0   24.07    0.99 
  -5   3   0   23.18    1.08 
   5   3   0   22.92    1.32 
  -5   3   0   21.03    1.23 
  -5   3   0   22.45    1.08 
   5   3   0   22.20    1.22 
  -5   3   0   23.18    0.99 
   7  -3   0   30.02    1.34 
   7  -3   0   28.64    1.46 
   7  -3   0   29.62    1.24 
  -7  -3   0   32.05    1.47 
   7  -3   0   28.61    1.24 
   7  -3   0   31.80    1.28 
  -7   3   0   30.84    1.22 
   7   3   0   32.73    1.49 
  -7   3   0   31.77    1.41 
  -7   3   0   31.12    1.26 
   7   3   0   31.06    1.54 
  -7   3   0   30.29    1.30 
  -7   3   0   29.38    1.16 
   7   3   0   30.58    1.40 
   9  -3   0   57.07    1.94 
  -9  -3   0   55.49    1.54 
   9  -3   0   57.65    2.06 
  -9  -3   0   55.44    2.05 
   9  -3   0   56.06    1.75 
   9  -3   0   55.35    1.81 
   9  -3   0   55.25    1.82 
   9   3   0   57.10    1.53 
   9   3   0   55.38    2.07 
  -9   3   0   56.99    1.88 
  -9   3   0   57.08    1.76 
  -9   3   0   56.48    2.05 
  -9   3   0   55.75    1.73 
   9   3   0   56.25    1.91 
  -9   3   0   56.87    1.70 
   9   3   0   54.17    1.43 
  11  -3   0   28.11    1.47 
  11  -3   0   28.79    1.56 
 -11  -3   0   28.38    1.23 
 -11  -3   0   29.43    1.21 
 -11  -3   0   26.63    1.59 
 -11  -3   0   29.06    1.27 
  11  -3   0   26.49    1.50 
  11  -3   0   29.54    1.45 
 -11  -3   0   28.70    1.18 
  11  -3   0   30.86    1.44 
 -11   3   0   28.55    1.25 
  11   3   0   29.00    1.13 
 -11   3   0   29.11    1.47 
 -11   3   0   25.78    1.32 
 -11   3   0   27.96    1.64 
  11   3   0   29.09    1.47 
  11   3   0   27.21    1.61 
  11   3   0   30.10    1.21 
 -11   3   0   29.35    1.42 
 -13  -3   0    5.63    0.86 
 -13  -3   0    5.95    0.78 
  13  -3   0    6.28    0.97 
 -13  -3   0    7.81    0.98 
  13  -3   0    8.10    0.99 
  13  -3   0    8.20    1.13 
  13  -3   0    6.24    0.99 
 -13  -3   0    7.77    1.00 
  13  -3   0    7.63    1.06 
 -13  -3   0    5.60    0.93 
  13  -3   0    7.20    0.97 
  13   3   0    8.98    1.01 
  13   3   0   10.02    1.13 
 -13   3   0    7.50    1.03 
 -13   3   0    5.16    0.87 
  13   3   0    6.54    0.87 
  13   3   0    6.43    1.06 
 -13   3   0    6.41    0.96 
 -13   3   0    7.32    1.29 
  13   3   0    7.83    0.84 
 -13   3   0    8.34    0.93 
  15  -3   0   34.03    1.90 
 -15  -3   0   33.78    1.72 
 -15  -3   0   32.68    1.59 
 -15  -3   0   31.32    1.89 
  15  -3   0   33.39    1.21 
  15  -3   0   33.57    1.97 
 -15  -3   0   33.61    1.60 
  15  -3   0   32.39    1.80 
  15  -3   0   35.10    1.90 
  15  -3   0   34.09    1.71 
  15  -3   0   33.40    1.79 
  15   3   0   32.80    1.96 
 -15   3   0   36.94    1.89 
  15   3   0   35.80    1.72 
  15   3   0   33.70    1.64 
 -15   3   0   33.48    1.78 
 -15   3   0   32.85    2.13 
 -15   3   0   33.93    1.76 
 -15   3   0   34.85    1.48 
  15   3   0   34.52    1.51 
  15   3   0   35.67    1.70 
  17  -3   0   26.18    1.83 
  17  -3   0   29.71    1.76 
  17  -3   0   28.70    1.36 
 -17  -3   0   29.18    1.83 
  17  -3   0   25.30    2.08 
 -17  -3   0   29.41    1.74 
 -17  -3   0   30.46    1.70 
  17  -3   0   25.49    1.91 
 -17  -3   0   28.80    1.95 
  17  -3   0   26.83    1.88 
  17  -3   0   25.69    1.88 
  17   3   0   27.57    1.68 
 -17   3   0   26.45    1.93 
  17   3   0   25.79    1.73 
  17   3   0   26.78    1.75 
 -17   3   0   26.53    1.80 
 -17   3   0   28.26    2.27 
 -17   3   0   29.22    1.48 
  17   3   0   29.98    1.60 
  17   3   0   30.16    2.06 
 -17   3   0   27.87    1.91 
  19  -3   0   12.40    1.56 
  19  -3   0   14.28    1.78 
 -19  -3   0   14.60    1.94 
  19  -3   0   13.03    1.57 
 -19  -3   0   12.50    1.39 
  19  -3   0   12.73    1.55 
 -19  -3   0   14.19    1.77 
 -19  -3   0   15.26    1.67 
  19  -3   0   18.69    2.22 
  19  -3   0   11.71    1.55 
  19  -3   0   13.29    1.40 
  19   3   0   15.13    2.04 
 -19   3   0   14.03    1.80 
  19   3   0   15.50    1.77 
  19   3   0   13.13    1.72 
 -19   3   0   15.48    1.43 
  19   3   0   14.73    1.46 
 -19   3   0   12.55    1.80 
 -19   3   0   15.64    1.90 
  19   3   0   13.24    1.56 
 -19   3   0   11.16    1.41 
  21  -3   0    7.56    1.53 
  21  -3   0    9.70    1.68 
 -21  -3   0    8.91    1.55 
 -21  -3   0    8.81    1.53 
  21  -3   0    8.75    1.52 
  21  -3   0    8.18    1.63 
 -21  -3   0    9.68    1.36 
  21  -3   0   11.54    1.29 
 -21  -3   0    8.46    1.40 
  21  -3   0    8.77    1.50 
  21   3   0    8.91    1.30 
  21   3   0    8.75    1.40 
 -21   3   0    8.20    1.40 
 -21   3   0    8.22    1.83 
  21   3   0    8.68    1.46 
 -21   3   0    8.59    1.59 
  21   3   0    9.07    1.34 
  21   3   0    7.33    1.67 
 -21   3   0    8.36    1.20 
 -23  -3   0    3.89    1.52 
  23  -3   0    3.92    1.46 
  23  -3   0    5.72    1.80 
 -23  -3   0    4.30    1.60 
  23  -3   0    3.23    1.48 
  23  -3   0    5.80    1.39 
 -23  -3   0    5.21    1.53 
  23  -3   0    5.65    1.62 
 -23  -3   0    7.19    1.52 
 -23   3   0    5.29    2.10 
  23   3   0    2.24    1.63 
  23   3   0    5.34    1.20 
 -23   3   0    3.55    1.18 
  23   3   0    5.12    1.59 
  23   3   0    5.27    1.53 
 -23   3   0    4.99    1.74 
  23   3   0    5.66    1.32 
  25  -3   0   -0.69    1.82 
  25  -3   0    2.42    1.87 
 -25  -3   0    2.91    1.68 
  25  -3   0    3.28    1.50 
  25  -3   0   -1.60    1.70 
  25  -3   0    0.57    1.56 
  25  -3   0    2.91    2.06 
 -25  -3   0    0.69    1.68 
 -25  -3   0   -0.67    1.81 
 -25   3   0   -2.05    1.33 
 -25   3   0    0.69    1.94 
 -25   3   0    0.00    1.76 
 -25   3   0   -2.92    1.55 
  25   3   0    2.70    1.74 
  25   3   0   -2.04    1.26 
  25   3   0   -0.70    1.70 
  25   3   0   -1.26    1.34 
 -27  -3   0    4.82    2.19 
 -27  -3   0    5.04    2.15 
  27  -3   0    6.90    1.87 
 -27  -3   0    8.56    2.13 
  27  -3   0    9.56    2.18 
  27  -3   0    5.57    2.73 
  27  -3   0    4.89    2.02 
  27   3   0    6.42    1.85 
  27   3   0    2.57    1.59 
 -27   3   0    5.41    1.86 
 -27   3   0    8.79    2.53 
  27   3   0    7.18    2.07 
  27   3   0    6.39    2.47 
 -27   3   0    5.15    2.21 
 -29  -3   0   10.46    2.62 
  29  -3   0    6.37    2.36 
 -29  -3   0    6.37    2.59 
 -29  -3   0    5.90    2.53 
  29  -3   0    1.95    1.98 
  29  -3   0    5.56    2.29 
  29   3   0   -0.17    1.97 
  29   3   0   -0.09    1.81 
 -29   3   0    5.58    2.87 
 -29   3   0    0.59    2.47 
  31  -3   0   -0.49    2.77 
  31  -3   0    1.65    2.44 
  31  -3   0   -1.21    2.65 
 -31  -3   0   -5.19    2.72 
 -31  -3   0    4.26    3.08 
  31   3   0   -1.99    2.33 
  31   3   0    2.92    2.13 
 -31   3   0   -5.64    2.90 
 -31   3   0    6.49    3.64 
  33  -3   0   -0.09    3.20 
  33  -3   0   -0.01    3.40 
  33  -3   0    4.39    2.89 
 -33  -3   0    1.82    3.68 
 -33   3   0    2.15    3.58 
 -33   3   0    6.49    3.72 
  33   3   0    4.33    2.97 
  33   3   0    1.92    2.63 
   0  -4   0  326.56    6.66 
   0  -4   0  345.34    6.49 
   0   4   0  334.37    6.72 
   0   4   0  337.47    6.37 
   2  -4   0   44.08    1.60 
  -2  -4   0   44.51    1.78 
  -2  -4   0   43.17    2.03 
   2  -4   0   41.50    1.97 
  -2   4   0   45.31    1.32 
  -2   4   0   43.54    1.58 
  -2   4   0   37.37    1.94 
   2   4   0   43.69    1.74 
   2   4   0   41.14    2.05 
  -2   4   0   41.69    1.50 
   4  -4   0   86.20    2.11 
  -4  -4   0   85.35    2.59 
   4  -4   0   83.69    2.14 
   4  -4   0   82.13    2.08 
   4  -4   0   82.51    2.16 
   4  -4   0   80.29    2.14 
   4  -4   0   82.87    2.75 
  -4   4   0   85.44    2.08 
  -4   4   0   79.00    2.65 
   4   4   0   83.24    2.53 
   4   4   0   72.40    2.68 
  -4   4   0   82.57    2.14 
  -4   4   0   79.92    2.26 
   6  -4   0  112.03    2.67 
   6  -4   0  113.04    2.52 
  -6  -4   0  115.61    3.21 
   6  -4   0  117.83    2.70 
   6  -4   0  110.82    3.30 
   6  -4   0  110.87    2.78 
   6  -4   0  111.47    2.75 
   6   4   0  109.74    3.28 
  -6   4   0  110.30    3.11 
  -6   4   0  115.85    2.96 
  -6   4   0  112.39    2.55 
   6   4   0   93.44    2.99 
  -6   4   0  112.87    2.67 
  -6   4   0  109.18    2.73 
  -6   4   0  115.31    2.88 
   8  -4   0   14.12    1.31 
   8  -4   0   14.49    1.25 
   8  -4   0   14.92    1.20 
   8  -4   0   16.37    1.30 
   8  -4   0   13.25    1.51 
  -8  -4   0   14.71    1.41 
   8   4   0   16.17    1.37 
   8   4   0   13.97    1.63 
  -8   4   0   13.32    1.24 
  -8   4   0   15.16    1.12 
   8   4   0   13.88    1.47 
  -8   4   0   14.03    1.07 
  -8   4   0   12.74    1.34 
  -8   4   0   15.03    1.22 
  10  -4   0    4.13    0.90 
 -10  -4   0    3.21    0.90 
  10  -4   0    3.58    0.82 
  10  -4   0    4.95    0.88 
  10  -4   0    5.04    1.14 
  10  -4   0    7.15    1.02 
 -10   4   0    3.63    0.76 
  10   4   0    4.86    1.14 
 -10   4   0    4.06    0.77 
  10   4   0    4.85    0.90 
 -10   4   0    4.59    1.03 
 -10   4   0    4.19    0.87 
 -10   4   0    4.41    0.92 
  10   4   0    3.10    0.97 
 -12  -4   0    2.33    1.04 
  12  -4   0    3.35    0.95 
  12  -4   0    4.43    1.18 
  12  -4   0    4.93    0.86 
  12  -4   0    1.82    0.99 
  12  -4   0    4.32    0.98 
  12   4   0    3.69    1.08 
  12   4   0    5.66    1.19 
  12   4   0    4.28    0.94 
  12   4   0    4.42    0.69 
  12   4   0    3.37    0.62 
 -12   4   0    3.54    0.83 
 -12   4   0    3.77    0.85 
 -12   4   0    3.02    0.93 
 -12   4   0    3.23    0.92 
 -12   4   0    4.89    1.15 
  14  -4   0    9.46    1.23 
  14  -4   0    9.29    1.26 
 -14  -4   0    7.00    1.13 
  14  -4   0   10.53    1.40 
  14  -4   0    9.47    1.39 
  14  -4   0   11.17    1.47 
 -14  -4   0    9.54    1.03 
 -14   4   0    9.30    1.20 
 -14   4   0    9.72    1.32 
 -14   4   0   12.28    1.56 
 -14   4   0    9.52    1.27 
  14   4   0   10.83    1.34 
  14   4   0    8.20    0.89 
  14   4   0    7.63    1.41 
 -14   4   0   10.74    1.47 
  14   4   0   11.03    1.39 
  14   4   0    7.78    0.93 
 -16  -4   0   22.49    1.71 
  16  -4   0   18.73    2.07 
  16  -4   0   21.45    1.82 
  16  -4   0   19.18    2.17 
 -16  -4   0   19.44    1.50 
 -16  -4   0   19.92    1.66 
 -16  -4   0   23.32    1.68 
 -16  -4   0   20.47    2.03 
  16  -4   0   21.26    1.98 
  16  -4   0   17.68    1.97 
  16   4   0   16.80    2.12 
 -16   4   0   19.89    1.57 
 -16   4   0   20.65    2.00 
  16   4   0   16.92    1.37 
  16   4   0   21.86    1.78 
  16   4   0   21.25    1.63 
 -16   4   0   20.48    1.84 
 -16   4   0   22.13    2.33 
  16   4   0   19.72    1.79 
 -16   4   0   23.68    1.78 
 -18  -4   0   -0.54    1.19 
 -18  -4   0    0.81    1.04 
 -18  -4   0   -0.64    1.00 
 -18  -4   0    1.07    1.12 
  18  -4   0   -0.70    1.34 
  18  -4   0   -0.45    1.26 
  18  -4   0    2.15    1.06 
  18  -4   0    0.58    1.41 
 -18  -4   0    0.76    1.11 
  18   4   0    0.95    1.07 
 -18   4   0   -0.01    1.19 
  18   4   0    0.67    1.03 
  18   4   0    2.26    0.92 
 -18   4   0    1.78    1.23 
  18   4   0    1.43    1.12 
 -18   4   0    4.40    1.38 
 -18   4   0    0.74    0.95 
 -20  -4   0    6.03    1.54 
  20  -4   0    5.38    1.34 
 -20  -4   0    4.42    1.35 
  20  -4   0    3.49    1.63 
  20  -4   0    4.19    1.38 
 -20  -4   0    1.99    1.39 
  20  -4   0    3.80    1.56 
 -20  -4   0    3.58    1.20 
  20  -4   0    6.56    1.75 
 -20  -4   0    3.62    1.45 
  20   4   0    4.17    1.10 
  20   4   0    4.26    1.30 
 -20   4   0    3.87    1.56 
  20   4   0    3.85    1.25 
 -20   4   0    3.31    1.15 
 -20   4   0    7.55    1.81 
 -20   4   0    6.26    1.70 
  20   4   0    5.54    1.38 
  22  -4   0    4.82    1.53 
  22  -4   0    6.28    1.68 
 -22  -4   0    4.26    1.67 
 -22  -4   0    5.19    1.55 
 -22  -4   0    3.90    1.63 
  22  -4   0    8.58    2.17 
 -22  -4   0    3.68    1.57 
  22  -4   0    7.98    1.78 
  22   4   0    6.56    1.69 
 -22   4   0    6.60    1.37 
  22   4   0    5.87    1.40 
  22   4   0    1.09    1.83 
  22   4   0    2.88    1.48 
 -22   4   0    6.47    2.04 
  22   4   0    5.80    1.47 
 -22   4   0    4.82    1.85 
 -24  -4   0    8.87    1.96 
  24  -4   0    8.41    1.79 
  24  -4   0    4.91    1.87 
 -24  -4   0    3.58    1.96 
 -24  -4   0    5.85    1.95 
  24  -4   0   10.32    2.49 
 -24  -4   0    6.81    1.85 
 -24  -4   0    7.62    1.88 
  24  -4   0    5.26    2.14 
  24  -4   0   12.47    2.26 
 -24   4   0    8.78    2.13 
  24   4   0    5.55    1.79 
 -24   4   0   13.47    2.46 
  24   4   0    9.83    1.71 
  24   4   0    9.49    1.73 
  24   4   0    7.78    1.96 
 -24   4   0    6.19    1.50 
 -26  -4   0   -0.06    2.00 
  26  -4   0    5.00    2.16 
  26  -4   0    2.44    1.41 
 -26  -4   0    1.31    2.24 
 -26  -4   0    1.17    2.17 
  26  -4   0    3.51    1.93 
  26  -4   0   -1.21    1.89 
  26   4   0    1.82    1.72 
 -26   4   0    5.30    2.60 
 -26   4   0    4.23    2.23 
 -26   4   0   -0.86    1.72 
  26   4   0    6.42    1.76 
  26   4   0    4.32    2.25 
  28  -4   0    8.91    2.88 
  28  -4   0    5.06    2.31 
  28  -4   0    1.71    2.35 
 -28  -4   0    4.50    2.67 
 -28  -4   0    4.25    2.53 
  28  -4   0    2.75    1.76 
 -28   4   0    6.02    3.10 
  28   4   0   -0.88    1.98 
 -28   4   0    4.51    2.65 
  28   4   0    2.06    2.08 
  30  -4   0    7.81    2.93 
  30  -4   0   11.60    3.42 
 -30  -4   0    4.78    3.10 
  30  -4   0    6.30    2.81 
 -30   4   0    2.37    3.14 
 -30   4   0    5.92    3.92 
  30   4   0   -1.65    2.29 
   1  -5   0   18.35    1.91 
  -1  -5   0   17.34    1.99 
  -1  -5   0   14.56    1.46 
   1  -5   0   17.80    1.44 
   1   5   0   19.80    2.15 
  -1   5   0   20.23    2.07 
  -1   5   0   17.09    1.47 
   1   5   0   14.87    1.50 
   3  -5   0   11.06    1.28 
   3  -5   0   15.23    1.84 
  -3  -5   0   12.01    1.46 
  -3   5   0   11.81    1.41 
   3   5   0   12.99    1.66 
  -3   5   0   13.63    1.67 
  -3   5   0    8.53    0.99 
   3   5   0   13.16    1.51 
   5  -5   0    2.51    0.83 
   5  -5   0    3.93    1.27 
  -5  -5   0    0.88    0.92 
   5  -5   0    1.12    0.76 
   5  -5   0    2.28    0.72 
  -5   5   0    1.59    0.86 
  -5   5   0    1.65    1.13 
   5   5   0    2.02    0.91 
  -5   5   0    2.05    0.69 
   5   5   0    3.89    1.39 
   7  -5   0   25.33    1.37 
   7  -5   0   31.93    1.68 
  -7  -5   0   26.77    1.96 
   7  -5   0   28.85    1.78 
   7  -5   0   27.97    1.66 
   7  -5   0   30.71    2.30 
   7  -5   0   27.74    1.66 
  -7   5   0   26.15    1.47 
  -7   5   0   31.71    2.22 
  -7   5   0   29.06    1.54 
  -7   5   0   27.97    1.86 
  -7   5   0   30.33    2.02 
   7   5   0   28.16    2.03 
   7   5   0   28.16    2.03 
   7   5   0   30.89    2.39 
  -7   5   0   29.63    1.82 
   9  -5   0   21.60    2.21 
   9  -5   0   22.42    1.72 
   9  -5   0   22.51    1.71 
   9  -5   0   21.30    1.68 
   9  -5   0   22.80    1.84 
  -9  -5   0   19.81    1.98 
   9   5   0   18.67    2.30 
  -9   5   0   19.68    1.83 
   9   5   0   20.94    1.95 
  -9   5   0   20.65    1.94 
  -9   5   0   20.71    1.50 
  -9   5   0   22.52    1.77 
  -9   5   0   18.79    1.61 
   9   5   0   23.09    2.07 
  11  -5   0   19.82    1.78 
  11  -5   0   22.47    1.93 
 -11  -5   0   21.93    2.04 
  11  -5   0   24.14    2.33 
  11  -5   0   24.56    1.94 
  11  -5   0   20.40    1.90 
 -11   5   0   24.18    2.18 
 -11   5   0   20.24    1.65 
 -11   5   0   24.10    2.00 
  11   5   0   22.41    2.16 
 -11   5   0   20.85    1.77 
  11   5   0   21.61    2.42 
 -11   5   0   24.46    1.72 
  11   5   0   22.77    1.94 
  13  -5   0   21.90    2.23 
 -13  -5   0   21.90    2.17 
  13  -5   0   25.96    1.97 
  13  -5   0   23.76    2.09 
  13  -5   0   25.35    2.22 
  13  -5   0   24.42    2.47 
 -13   5   0   26.13    1.98 
  13   5   0   26.66    2.34 
 -13   5   0   23.19    1.89 
  13   5   0   26.27    1.82 
  13   5   0   27.42    2.15 
 -13   5   0   21.79    2.44 
 -13   5   0   23.50    2.18 
 -13   5   0   24.13    1.71 
  13   5   0   22.62    2.69 
  15  -5   0    1.50    1.53 
  15  -5   0    3.33    1.23 
 -15  -5   0    2.05    1.46 
  15  -5   0    2.10    1.36 
  15  -5   0    1.93    1.47 
  15  -5   0    2.57    1.44 
 -15   5   0    5.82    1.19 
 -15   5   0    2.66    1.14 
  15   5   0    4.56    1.92 
  15   5   0    3.52    1.15 
  15   5   0    2.04    1.25 
 -15   5   0    2.68    1.22 
 -15   5   0    3.64    1.37 
 -15   5   0    2.14    1.60 
  17  -5   0    6.00    1.90 
 -17  -5   0    2.32    1.46 
  17  -5   0    8.54    1.75 
  17  -5   0    7.50    1.80 
  17  -5   0    4.59    1.43 
 -17   5   0    5.99    1.69 
 -17   5   0    5.43    1.42 
 -17   5   0    4.91    1.85 
  17   5   0    2.82    1.97 
  17   5   0    5.73    1.53 
  17   5   0    4.79    1.35 
  17   5   0    6.81    1.29 
 -17   5   0    6.18    1.61 
 -17   5   0    6.06    1.35 
  17   5   0    4.21    0.97 
  19  -5   0    8.22    1.75 
  19  -5   0    6.90    2.10 
  19  -5   0    3.26    2.05 
  19  -5   0    8.47    2.24 
 -19  -5   0    7.96    1.85 
  19  -5   0    9.74    1.97 
  19   5   0    9.40    2.41 
 -19   5   0    8.92    1.91 
  19   5   0    9.32    1.70 
 -19   5   0    8.31    1.87 
  19   5   0    6.60    1.26 
  19   5   0    7.23    1.71 
 -19   5   0    5.71    1.97 
 -19   5   0    9.17    1.47 
  19   5   0   11.84    1.53 
 -19   5   0    5.39    1.62 
 -21  -5   0    2.07    1.51 
 -21  -5   0    0.74    1.83 
  21  -5   0    2.30    2.02 
 -21  -5   0    1.13    1.64 
  21  -5   0    3.50    1.69 
  21  -5   0    2.49    2.21 
  21   5   0    0.34    1.61 
 -21   5   0    3.27    1.97 
 -21   5   0    1.51    2.31 
  21   5   0    3.64    1.65 
  21   5   0    5.30    1.79 
  21   5   0    2.90    1.33 
 -21   5   0    1.73    1.43 
 -23  -5   0   -0.63    2.20 
 -23  -5   0    1.67    1.74 
  23  -5   0    2.01    2.68 
 -23  -5   0   -3.65    1.89 
  23  -5   0   -0.94    2.22 
  23  -5   0   -6.69    2.64 
 -23  -5   0    2.73    2.05 
  23  -5   0    0.82    1.98 
 -23  -5   0    0.69    2.19 
 -23   5   0    3.74    1.79 
  23   5   0    1.44    2.03 
  23   5   0    4.16    2.02 
 -23   5   0    1.49    2.17 
 -23   5   0    1.42    2.65 
  23   5   0    3.08    1.91 
  23   5   0    1.67    1.61 
 -25  -5   0    3.37    2.28 
  25  -5   0    2.46    3.14 
  25  -5   0   -1.24    2.63 
 -25  -5   0    5.50    2.86 
 -25  -5   0    0.80    2.28 
  25  -5   0   -3.13    2.20 
 -25   5   0    2.15    2.68 
  25   5   0    1.88    2.09 
 -25   5   0    1.57    2.67 
  25   5   0    2.95    2.41 
 -25   5   0    2.66    2.04 
  25   5   0    1.89    1.81 
  27  -5   0    2.18    2.52 
  27  -5   0   -0.27    3.14 
  27  -5   0   -4.57    3.63 
 -27  -5   0   -0.16    2.77 
  27   5   0    3.44    2.24 
 -27   5   0    0.36    3.29 
 -27   5   0    1.55    3.01 
  29  -5   0   -2.41    3.51 
  29  -5   0    4.01    3.00 
 -29  -5   0    2.78    3.22 
 -29   5   0   -1.68    3.92 
 -29   5   0   -1.37    3.32 
  29   5   0    0.55    2.69 
   0  -6   0   43.66    2.38 
   0  -6   0   42.91    2.97 
   0   6   0   44.78    2.42 
   0   6   0   46.76    1.93 
   0   6   0   48.03    3.09 
   0   6   0   44.30    1.78 
   2  -6   0   59.04    2.50 
  -2  -6   0   60.55    2.78 
   2  -6   0   63.94    3.26 
   2   6   0   61.64    2.88 
  -2   6   0   56.33    3.36 
   2   6   0   67.58    3.50 
   4  -6   0   36.59    2.07 
  -4  -6   0   42.45    2.58 
   4  -6   0   44.94    3.16 
  -4   6   0   40.87    2.26 
   4   6   0   41.21    3.23 
   4   6   0   44.88    2.62 
  -4   6   0   41.95    3.01 
   6  -6   0   21.85    1.68 
   6  -6   0   22.49    2.68 
  -6  -6   0   16.81    2.17 
   6  -6   0   19.33    1.74 
   6  -6   0   18.81    1.66 
  -6   6   0   17.21    2.13 
   6   6   0   24.03    3.03 
   6   6   0   16.81    1.92 
   6   6   0   21.31    2.36 
  -6   6   0   18.81    1.58 
  -6   6   0   25.52    2.33 
   8  -6   0    9.61    1.35 
   8  -6   0   13.13    1.48 
  -8  -6   0    9.49    1.97 
   8  -6   0   12.94    2.12 
   8  -6   0   13.77    1.52 
   8  -6   0   12.86    1.46 
  -8   6   0   13.32    1.66 
   8   6   0   17.89    2.31 
  -8   6   0   14.18    1.67 
  -8   6   0   14.38    1.64 
   8   6   0    8.69    1.69 
  -8   6   0   11.38    1.77 
   8   6   0    9.53    2.27 
  10  -6   0    2.30    1.34 
  10  -6   0    1.68    1.47 
  10  -6   0    3.07    1.22 
  10  -6   0   -0.34    1.33 
  10  -6   0    2.01    1.76 
 -10  -6   0    1.40    1.50 
 -10   6   0    3.79    1.43 
  10   6   0    0.12    1.46 
  10   6   0    1.05    2.18 
 -10   6   0    2.80    1.50 
 -10   6   0    2.75    1.70 
 -10   6   0    0.56    1.18 
 -10   6   0   -0.33    1.24 
  10   6   0   -2.20    1.36 
  12  -6   0    2.57    1.71 
 -12  -6   0    4.52    1.79 
  12  -6   0    0.66    1.72 
  12  -6   0    2.48    1.51 
  12  -6   0   -0.89    1.35 
  12   6   0    0.10    1.38 
 -12   6   0   -0.15    1.26 
  12   6   0    0.12    1.64 
 -12   6   0    1.55    1.43 
 -12   6   0    0.26    1.72 
  12   6   0   -0.33    2.26 
 -12   6   0   -1.70    1.29 
 -12   6   0    3.93    1.65 
  14  -6   0    5.12    2.08 
  14  -6   0    3.18    1.57 
  14  -6   0    4.28    2.12 
  14  -6   0    3.84    1.75 
 -14  -6   0    1.19    1.65 
  14   6   0    2.47    2.01 
 -14   6   0    3.53    1.82 
 -14   6   0    1.15    1.37 
  14   6   0    2.38    1.61 
 -14   6   0    2.59    1.50 
 -14   6   0    1.78    2.05 
  14   6   0    2.10    2.37 
 -14   6   0    1.85    1.51 
  16  -6   0    2.10    1.87 
  16  -6   0    1.49    2.22 
  16  -6   0    0.42    2.11 
 -16  -6   0    1.38    1.89 
  16  -6   0    1.70    1.97 
  16  -6   0    1.08    1.72 
 -16   6   0    2.12    1.56 
  16   6   0    0.31    1.70 
 -16   6   0   -0.52    2.16 
 -16   6   0   -0.27    1.74 
 -16   6   0    2.26    1.99 
  18  -6   0   -0.57    2.34 
 -18  -6   0    0.71    2.17 
  18  -6   0    2.75    2.44 
  18  -6   0    1.15    2.24 
  18  -6   0    0.04    1.82 
  18   6   0    1.55    1.77 
 -18   6   0   -0.98    2.32 
 -18   6   0   -1.74    1.96 
 -18   6   0   -0.04    2.02 
  18   6   0    2.28    1.93 
 -18   6   0   -0.48    1.71 
  20  -6   0    2.41    2.72 
  20  -6   0   -1.93    2.07 
  20  -6   0    3.35    2.74 
 -20  -6   0    1.56    2.22 
 -20   6   0    0.64    2.70 
  20   6   0   -1.10    1.99 
 -20   6   0    2.61    2.32 
 -20   6   0    0.05    1.83 
  20   6   0    4.33    2.07 
  22  -6   0   -0.58    3.02 
  22  -6   0   -3.09    3.46 
  22  -6   0    0.87    3.15 
  22  -6   0    3.52    2.35 
 -22  -6   0   -3.36    2.56 
 -22   6   0   -1.16    2.56 
 -22   6   0    5.01    3.14 
 -22   6   0    1.33    2.01 
  22   6   0   -2.72    2.23 
  22   6   0    3.42    2.42 
  24  -6   0    0.72    3.43 
 -24  -6   0    4.86    3.40 
  24  -6   0    3.19    2.64 
 -24   6   0   -0.05    3.00 
  24   6   0   -0.86    2.60 
 -24   6   0    1.23    3.53 
  24   6   0    2.42    2.75 
  26  -6   0   11.95    4.16 
  26  -6   0    9.11    3.17 
 -26   6   0    5.13    4.32 
  26   6   0    3.01    2.81 
 -26   6   0   -0.89    3.38 
   1  -7   0   15.02    1.84 
   1  -7   0   19.62    2.81 
  -1  -7   0   12.71    1.82 
   1   7   0   15.15    1.57 
   1   7   0   12.79    1.40 
  -1   7   0   13.76    2.68 
   1   7   0   10.07    2.75 
  -3  -7   0    3.40    1.76 
   3  -7   0    4.44    2.37 
   3  -7   0    2.87    1.42 
   3   7   0    2.89    2.76 
   3   7   0    1.69    1.30 
  -3   7   0    2.43    2.55 
   3   7   0    4.94    1.98 
   5  -7   0    1.04    1.33 
   5  -7   0    3.02    2.19 
  -5  -7   0    2.38    1.61 
   5   7   0    2.56    1.49 
   5   7   0    1.60    1.93 
  -5   7   0    2.79    1.66 
   5   7   0   -0.42    1.88 
  -5   7   0   -0.05    1.92 
  -5   7   0   -0.70    1.17 
   7  -7   0    4.06    2.46 
  -7  -7   0    1.88    1.96 
   7  -7   0    2.30    1.33 
  -7   7   0    4.81    2.04 
   7   7   0    4.89    2.00 
  -7   7   0   -1.75    1.87 
  -7   7   0    1.75    1.32 
   7   7   0    1.92    2.02 
   9  -7   0    0.26    1.57 
   9  -7   0   -0.99    1.58 
  -9  -7   0    1.71    1.89 
   9  -7   0   -1.18    2.40 
   9   7   0    1.01    2.00 
  -9   7   0    3.34    2.12 
  -9   7   0    2.17    2.08 
   9   7   0    3.64    2.21 
  -9   7   0    3.33    1.48 
  11  -7   0    1.24    1.82 
  11  -7   0    4.69    1.95 
  11  -7   0    6.88    2.76 
  11  -7   0    3.97    1.81 
 -11  -7   0    4.66    2.09 
 -11   7   0    1.13    2.08 
  11   7   0    3.45    2.00 
 -11   7   0    6.89    2.53 
 -11   7   0    1.57    1.66 
 -11   7   0    3.37    1.87 
 -13  -7   0   12.46    2.48 
  13  -7   0    9.48    2.60 
  13  -7   0    9.34    2.11 
  13  -7   0   18.27    3.02 
  13   7   0   14.25    2.41 
 -13   7   0   11.16    2.48 
 -13   7   0   12.03    2.17 
 -13   7   0    8.19    2.11 
 -13   7   0   12.66    2.73 
  15  -7   0    3.61    2.44 
 -15  -7   0    4.75    2.53 
  15  -7   0    1.76    2.78 
  15  -7   0    6.10    2.20 
  15  -7   0    8.18    3.09 
  15   7   0    1.88    2.25 
 -15   7   0    5.28    2.90 
 -15   7   0    1.78    2.14 
 -15   7   0    8.18    2.41 
  17  -7   0    1.05    3.34 
 -17  -7   0    2.69    2.79 
  17  -7   0    6.17    2.41 
  17  -7   0    4.43    3.29 
 -17   7   0    2.32    2.80 
 -17   7   0   -0.20    2.31 
 -17   7   0    3.54    3.25 
  17   7   0    1.70    2.40 
  19  -7   0   -0.30    2.78 
 -19  -7   0    0.08    3.00 
  19  -7   0    5.64    3.38 
 -19   7   0    0.08    3.04 
  19   7   0    0.12    2.63 
 -19   7   0    1.61    3.63 
  21  -7   0    2.44    3.11 
  21  -7   0   -1.89    3.88 
 -21  -7   0   -3.76    3.11 
 -21   7   0   -1.61    3.96 
  21   7   0    1.48    2.93 
 -21   7   0    1.24    3.52 
   0  -8   0   28.10    3.46 
   2  -8   0   50.18    5.09 
   2  -8   0   46.21    3.62 
  -2  -8   0   50.24    3.87 
   2   8   0   46.34    2.92 
   2   8   0   55.82    3.14 
  -4  -8   0   43.42    3.86 
   4  -8   0   43.39    5.19 
   4   8   0   39.65    3.10 
  -4   8   0   47.76    4.94 
   4   8   0   37.64    4.48 
   6  -8   0    7.53    3.48 
  -6  -8   0    7.77    2.47 
   6   8   0    5.71    2.78 
  -6   8   0    7.19    3.00 
   6   8   0    5.45    2.12 
   6   8   0   11.45    2.85 
   8  -8   0    5.68    3.38 
  -8  -8   0    5.81    2.86 
   8   8   0    0.15    2.16 
   8   8   0    0.36    2.75 
  -8   8   0    2.91    2.97 
 -10  -8   0    5.60    2.83 
  10  -8   0    7.13    3.62 
  10   8   0    5.77    2.57 
 -10   8   0    6.25    2.82 
  10   8   0    3.32    2.73 
 -12  -8   0    1.97    3.53 
  12  -8   0   -5.30    2.36 
  12  -8   0   -1.41    3.64 
  12   8   0   -0.70    2.73 
  12   8   0    0.24    2.91 
 -12   8   0   -1.42    2.87 
 -14  -8   0    1.40    3.20 
  14  -8   0   -1.94    4.00 
  14  -8   0   -4.97    2.70 
 -14   8   0   -0.89    3.13 
  14   8   0   -2.06    3.10 
  14   8   0    0.75    3.03 
  16  -8   0    1.79    3.02 
 -16  -8   0   -0.13    3.51 
  16  -8   0   12.54    4.51 
  16   8   0    6.08    3.67 
 -16   8   0    0.93    3.56 
  16   8   0    4.48    3.22 
   1   9   0    0.90    3.85 
   3   9   0   -2.35    3.76 
  36   0  -1    5.02    3.35 
  36   0  -1    8.24    2.91 
 -36   0   1   11.94    3.78 
 -34   0   1   12.80    3.34 
 -34   0   1   16.72    3.58 
  34   0  -1   10.00    3.10 
  34   0  -1   14.00    2.72 
  34   0  -1   14.23    2.86 
  32   0  -1    1.52    1.93 
 -32   0   1   -0.73    2.53 
 -32   0   1   -0.92    2.54 
  32   0  -1   -2.32    2.30 
  32   0  -1    7.11    3.06 
  32   0  -1    2.58    2.05 
  32   0  -1   -2.78    2.23 
  30   0  -1    2.16    1.59 
  30   0  -1    3.00    2.02 
 -30   0   1    0.93    2.03 
 -30   0   1    1.90    2.43 
  30   0  -1    4.45    2.50 
  30   0  -1    2.27    1.70 
  30   0  -1   -0.08    1.71 
 -30   0   1    4.80    2.01 
  28   0  -1    9.55    1.72 
 -28   0   1    9.28    1.75 
  28   0  -1   12.11    2.26 
  28   0  -1   10.34    1.90 
 -28   0   1   10.57    1.94 
  28   0  -1    9.62    2.13 
  28   0  -1    8.68    1.75 
 -28   0   1    5.59    1.83 
 -28   0   1    9.93    2.06 
  28   0  -1   10.55    1.72 
 -26   0   1    1.51    1.30 
  26   0  -1    2.39    1.23 
 -26   0   1    1.88    1.58 
  26   0  -1    4.15    1.34 
  26   0  -1    0.53    1.19 
  26   0  -1    4.88    1.73 
 -26   0   1    2.67    1.61 
 -26   0   1    2.05    1.24 
  24   0  -1    8.27    1.28 
 -24   0   1    6.66    1.66 
 -24   0   1    7.99    1.42 
  24   0  -1    5.13    1.29 
  24   0  -1    6.23    1.16 
  24   0  -1    5.41    1.41 
 -24   0   1    7.56    1.51 
  24   0  -1    6.15    1.40 
 -24   0   1    6.04    1.24 
  24   0  -1    7.21    1.43 
  22   0  -1    5.79    1.10 
  22   0  -1    6.24    1.05 
 -22   0   1    6.49    1.04 
  22   0  -1    6.64    1.02 
 -22   0   1    8.46    1.41 
 -22   0   1    5.26    1.21 
  22   0  -1    5.09    1.13 
  22   0  -1    6.19    1.36 
 -22   0   1    5.77    1.03 
  22   0  -1    7.12    1.26 
  20   0  -1    1.01    0.91 
  20   0  -1    1.24    0.81 
  20   0  -1    1.01    0.75 
  20   0  -1    1.26    0.62 
  20   0  -1   -0.42    0.77 
 -20   0   1    1.78    1.06 
  20   0  -1    0.09    0.85 
 -20   0   1    0.13    0.81 
 -20   0   1    0.31    0.68 
 -20   0   1    0.28    0.69 
 -18   0   1   38.04    1.61 
  18   0  -1   34.30    1.71 
  18   0  -1   38.18    1.88 
 -18   0   1   34.63    1.81 
  18   0  -1   32.79    1.44 
  18   0  -1   38.75    1.82 
 -18   0   1   36.48    1.95 
  18   0  -1   36.71    1.79 
 -18   0   1   37.51    1.70 
  18   0  -1   35.27    1.58 
 -16   0   1    1.33    0.66 
 -16   0   1    1.91    0.56 
  16   0  -1    1.20    0.69 
 -16   0   1    1.28    0.52 
  16   0  -1    1.76    0.55 
  16   0  -1    1.90    0.69 
  16   0  -1    1.56    0.51 
  16   0  -1    2.40    0.61 
 -16   0   1    1.70    0.73 
  16   0  -1    2.52    0.70 
  14   0  -1   33.72    1.30 
 -14   0   1   33.10    1.35 
 -14   0   1   34.61    1.27 
  14   0  -1   34.24    1.44 
  14   0  -1   34.39    1.43 
  14   0  -1   34.24    1.52 
  14   0  -1   34.92    1.23 
  14   0  -1   34.68    1.43 
 -14   0   1   32.18    1.44 
  12   0  -1   25.96    1.13 
  12   0  -1   28.27    1.07 
  12   0  -1   27.11    1.18 
  12   0  -1   26.53    0.99 
 -12   0   1   26.76    1.01 
 -12   0   1   25.17    1.19 
 -12   0   1   26.18    1.28 
 -12   0   1   27.54    1.13 
  12   0  -1   28.43    1.24 
  12   0  -1   28.09    1.17 
  10   0  -1    1.04    0.34 
  10   0  -1    0.99    0.34 
 -10   0   1    0.45    0.36 
  10   0  -1    1.14    0.33 
 -10   0   1    0.74    0.38 
  10   0  -1    0.95    0.27 
 -10   0   1    1.27    0.30 
  10   0  -1    1.27    0.35 
  10   0  -1    0.63    0.38 
 -10   0   1    0.91    0.28 
   8   0  -1  606.13    9.50 
   8   0  -1  609.65    9.70 
   8   0  -1  595.21    9.81 
  -8   0   1  595.40    9.49 
  -8   0   1  601.26    9.83 
   8   0  -1  600.59    9.77 
  -8   0   1  593.08    9.65 
   8   0  -1  589.39    9.79 
   8   0  -1  597.03    9.46 
  -6   0   1  113.13    2.23 
  -6   0   1  109.85    2.13 
  -6   0   1  111.15    2.09 
   6   0  -1  109.56    2.13 
   6   0  -1  110.01    2.20 
   6   0  -1  112.33    2.10 
   6   0  -1  111.44    2.08 
  -6   0   1  108.93    2.10 
   4   0  -1    0.46    0.12 
   4   0  -1    0.66    0.13 
   4   0  -1    0.54    0.14 
   4   0  -1    0.30    0.12 
  -4   0   1    0.47    0.14 
  -4   0   1    0.30    0.14 
   4   0  -1    0.02    0.12 
  -4   0  -1  348.46    5.83 
   4   0   1  346.55    5.68 
   4   0   1  339.07    5.81 
  -4   0  -1  378.27    5.89 
   4   0   1  344.94    5.83 
  -4   0  -1  339.50    5.76 
   4   0   1  355.63    5.85 
  -4   0  -1  349.48    5.85 
   4   0   1  370.58    5.80 
  -4   0  -1  375.82    5.69 
   4   0   1  351.99    5.67 
   6   0   1  613.93    9.68 
  -6   0  -1  620.85   10.00 
   6   0   1  620.03    9.95 
   6   0   1  615.75   10.00 
   6   0   1  618.30    9.65 
   6   0   1  606.29   10.00 
  -6   0  -1  613.29    9.86 
  -6   0  -1  615.80   10.05 
  -6   0  -1  607.11    9.69 
  -6   0  -1  620.36    9.67 
   6   0   1  609.22    9.88 
   8   0   1  149.26    2.88 
   8   0   1  150.21    2.98 
   8   0   1  151.93    2.93 
  -8   0  -1  150.03    3.01 
  -8   0  -1  148.82    3.00 
   8   0   1  150.17    3.03 
   8   0   1  150.24    3.10 
  -8   0  -1  148.21    2.99 
  -8   0  -1  151.92    2.95 
   8   0   1  151.61    2.99 
  -8   0  -1  150.14    2.92 
 -10   0  -1    9.74    0.71 
  10   0   1    9.65    0.82 
 -10   0  -1   10.81    0.80 
  10   0   1   10.89    0.78 
 -10   0  -1   12.08    0.91 
  10   0   1    9.76    0.68 
  10   0   1   10.44    0.64 
 -10   0  -1   11.02    0.82 
  10   0   1   10.38    0.79 
 -10   0  -1   10.26    0.67 
 -10   0  -1   10.61    0.68 
  10   0   1   10.93    0.83 
  12   0   1   17.93    1.12 
 -12   0  -1   15.62    0.89 
 -12   0  -1   16.01    1.06 
  12   0   1   17.34    1.03 
 -12   0  -1   17.67    1.20 
 -12   0  -1   15.53    1.07 
  12   0   1   15.72    0.84 
 -12   0  -1   19.03    0.96 
 -12   0  -1   16.44    0.97 
  12   0   1   16.17    1.04 
  12   0   1   18.19    1.10 
  12   0   1   16.35    0.93 
  14   0   1    2.60    0.63 
  14   0   1    4.79    0.78 
 -14   0  -1    3.24    0.62 
  14   0   1    3.10    0.59 
 -14   0  -1    3.45    0.59 
 -14   0  -1    3.83    0.83 
 -14   0  -1    3.82    0.82 
  14   0   1    3.31    0.67 
  14   0   1    2.33    0.52 
 -14   0  -1    3.68    0.61 
  14   0   1    4.76    0.79 
 -14   0  -1    4.12    0.77 
  16   0   1   19.08    1.22 
 -16   0  -1   15.41    1.18 
  16   0   1   18.58    1.08 
 -16   0  -1   21.04    1.19 
 -16   0  -1   20.07    1.54 
  16   0   1   20.18    1.43 
  16   0   1   18.41    1.42 
  16   0   1   18.97    1.35 
 -16   0  -1   20.22    1.43 
  16   0   1   19.87    1.31 
 -16   0  -1   18.41    1.28 
 -18   0  -1   22.13    1.67 
 -18   0  -1   19.54    1.46 
  18   0   1   18.43    1.71 
  18   0   1   23.05    1.58 
 -18   0  -1   23.60    1.45 
  18   0   1   21.45    1.31 
 -18   0  -1   23.30    1.84 
  18   0   1   21.88    1.65 
  18   0   1   22.52    1.64 
  18   0   1   21.51    1.42 
  20   0   1    8.25    1.20 
  20   0   1    8.81    1.11 
  20   0   1   13.22    1.69 
 -20   0  -1   11.04    1.38 
 -20   0  -1    8.62    1.37 
  20   0   1    8.00    1.39 
  20   0   1    8.63    1.14 
  20   0   1    9.47    1.38 
 -20   0  -1    9.18    1.16 
 -20   0  -1   10.12    1.44 
 -22   0  -1    6.18    1.34 
  22   0   1    7.64    1.55 
  22   0   1    6.80    1.18 
 -22   0  -1    6.47    1.46 
  22   0   1    5.95    1.36 
 -22   0  -1    6.72    1.22 
 -22   0  -1    5.17    1.24 
  22   0   1    5.92    1.07 
  22   0   1    5.02    1.29 
  22   0   1    6.38    1.37 
 -24   0  -1    3.18    1.47 
 -24   0  -1    4.14    1.43 
  24   0   1    4.18    1.39 
  24   0   1    3.50    1.12 
 -24   0  -1    2.01    1.64 
  24   0   1    4.30    1.22 
  24   0   1    4.75    1.75 
  24   0   1    2.28    1.40 
 -26   0  -1    4.24    1.66 
 -26   0  -1    2.64    1.73 
  26   0   1    2.83    1.83 
 -26   0  -1    4.21    1.73 
  26   0   1    3.53    1.37 
  26   0   1    2.19    1.36 
  26   0   1    3.52    1.43 
  26   0   1    0.92    1.88 
  26   0   1    2.56    1.68 
  28   0   1   19.64    2.79 
  28   0   1   24.83    2.49 
  28   0   1   22.87    2.64 
 -28   0  -1   34.41    3.76 
  28   0   1   21.67    2.33 
 -28   0  -1   27.23    2.85 
  30   0   1    2.42    1.93 
  30   0   1   -0.09    2.67 
 -30   0  -1    2.90    2.87 
 -30   0  -1    1.87    2.34 
  30   0   1   -1.11    1.91 
  30   0   1   -0.37    1.76 
  32   0   1   14.04    2.54 
 -32   0  -1   14.10    3.43 
 -32   0  -1   13.92    3.26 
  32   0   1   12.73    2.44 
  32   0   1   13.85    2.79 
 -34   0  -1    6.33    3.70 
 -34   0  -1    9.20    4.04 
  34   0   1    4.69    3.41 
  34   0   1    3.68    3.47 
  34   0   1    5.96    2.75 
  35  -1  -1   18.76    3.16 
 -35  -1   1   19.81    3.69 
  35  -1  -1   14.05    3.35 
  35  -1  -1   18.30    3.28 
 -35  -1   1   15.49    3.83 
  35   1  -1   11.13    3.37 
  35   1  -1   11.94    3.19 
  35   1  -1   13.42    2.96 
 -35   1   1   19.39    3.96 
 -35   1   1   13.01    3.81 
  33  -1  -1    4.98    2.26 
 -33  -1   1    2.73    2.95 
  33  -1  -1    3.78    2.58 
 -33  -1   1    3.76    2.95 
  33  -1  -1   -0.92    2.48 
  33   1  -1    3.50    2.94 
 -33   1   1    4.13    2.74 
 -33   1   1    6.14    3.07 
  33   1  -1    4.40    3.31 
  33   1  -1    7.26    2.15 
  33   1  -1   -4.10    2.36 
  33   1  -1    5.45    2.61 
 -31  -1   1   -0.17    2.46 
  31  -1  -1    0.85    1.60 
 -31  -1   1   -1.21    2.14 
  31  -1  -1    0.58    2.08 
  31  -1  -1   -1.22    2.18 
  31  -1  -1    2.78    2.21 
  31   1  -1    1.13    1.64 
 -31   1   1    2.90    2.45 
  31   1  -1    0.15    2.08 
  31   1  -1    2.91    2.16 
 -31   1   1    1.11    2.48 
 -31   1   1   -1.43    2.29 
  31   1  -1   -4.34    2.70 
  29  -1  -1    8.70    2.10 
  29  -1  -1   10.16    1.75 
  29  -1  -1    9.89    1.56 
 -29  -1   1   10.42    2.22 
  29  -1  -1   10.52    2.37 
 -29  -1   1    8.62    2.21 
  29  -1  -1    9.50    1.97 
  29   1  -1   11.18    1.83 
 -29   1   1    8.29    2.05 
 -29   1   1    9.73    2.41 
 -29   1   1   12.29    2.35 
  29   1  -1   12.32    2.44 
  29   1  -1    9.70    1.67 
  29   1  -1    9.30    2.10 
 -27  -1   1    3.51    1.78 
  27  -1  -1    1.43    1.72 
  27  -1  -1    3.98    1.53 
  27  -1  -1    3.79    1.59 
 -27  -1   1    4.45    1.82 
  27  -1  -1    5.00    1.32 
  27  -1  -1    2.94    1.25 
 -27  -1   1    5.74    1.82 
 -27   1   1    5.20    1.51 
  27   1  -1    6.69    1.76 
 -27   1   1    2.12    1.42 
 -27   1   1    3.01    1.67 
  27   1  -1    7.86    1.89 
  27   1  -1    3.27    1.19 
  27   1  -1    3.24    1.56 
  27   1  -1    3.83    1.51 
 -27   1   1    6.04    2.06 
  25  -1  -1    1.99    1.03 
 -25  -1   1    3.37    1.44 
 -25  -1   1    2.13    1.12 
  25  -1  -1    1.93    1.25 
 -25  -1   1   -0.05    1.19 
  25  -1  -1    2.69    1.12 
 -25  -1   1    2.51    1.54 
  25  -1  -1    1.20    1.43 
  25  -1  -1    1.06    1.26 
  25  -1  -1    3.41    1.44 
  25   1  -1    0.76    1.20 
 -25   1   1    0.35    1.22 
 -25   1   1    2.53    1.45 
  25   1  -1    1.32    1.49 
  25   1  -1   -0.09    1.14 
  25   1  -1    0.89    1.31 
 -25   1   1   -0.35    1.12 
 -25   1   1   -0.94    1.27 
  25   1  -1    1.08    0.95 
 -23  -1   1   19.04    2.05 
  23  -1  -1   19.00    2.14 
  23  -1  -1   22.51    1.89 
  23  -1  -1   19.39    1.64 
  23  -1  -1   16.82    1.52 
  23  -1  -1   21.64    2.27 
 -23  -1   1   18.54    1.81 
 -23  -1   1   22.03    2.20 
  23  -1  -1   15.65    1.82 
 -23  -1   1   16.56    1.70 
  23  -1  -1   19.54    1.92 
  23   1  -1   18.77    1.55 
 -23   1   1   17.32    2.23 
  23   1  -1   18.10    2.08 
  23   1  -1   17.18    1.88 
 -23   1   1   21.18    2.15 
 -23   1   1   17.37    1.83 
 -23   1   1   18.76    1.73 
  23   1  -1   21.77    1.95 
  23   1  -1   17.41    1.80 
  23   1  -1   16.66    1.94 
  21  -1  -1    4.92    1.21 
 -21  -1   1    3.94    0.99 
  21  -1  -1    3.70    0.93 
  21  -1  -1    4.58    0.97 
 -21  -1   1    4.54    0.94 
  21  -1  -1    3.29    0.88 
  21  -1  -1    2.18    0.94 
  21  -1  -1    4.39    1.12 
  21  -1  -1    4.31    0.80 
 -21  -1   1    4.39    1.14 
 -21  -1   1    3.83    1.15 
 -21   1   1    3.55    1.15 
 -21   1   1    2.70    0.82 
 -21   1   1    4.35    1.01 
  21   1  -1    4.18    1.00 
  21   1  -1    2.89    0.88 
  21   1  -1    5.05    1.03 
 -21   1   1    3.45    1.09 
  21   1  -1    3.88    0.82 
  21   1  -1    4.21    1.01 
  21   1  -1    4.67    1.13 
  19  -1  -1   13.08    1.49 
  19  -1  -1   10.98    1.33 
 -19  -1   1    8.90    1.09 
  19  -1  -1   11.66    1.31 
 -19  -1   1   10.67    1.18 
 -19  -1   1    9.62    1.19 
 -19  -1   1   10.92    1.36 
  19  -1  -1   10.41    1.06 
  19  -1  -1   10.26    1.12 
  19  -1  -1   12.89    1.52 
  19   1  -1   10.68    1.24 
  19   1  -1   11.12    1.43 
 -19   1   1   12.44    1.56 
  19   1  -1   11.51    1.36 
 -19   1   1   11.52    1.57 
  19   1  -1    9.91    1.29 
  19   1  -1   11.74    1.38 
 -19   1   1    9.87    1.07 
  19   1  -1   11.12    1.05 
 -19   1   1   11.08    1.31 
  17  -1  -1   16.08    1.33 
 -17  -1   1   15.13    1.13 
  17  -1  -1   16.23    1.02 
  17  -1  -1   12.94    1.35 
  17  -1  -1   18.54    1.38 
 -17  -1   1   17.25    1.22 
 -17  -1   1   15.29    1.30 
 -17  -1   1   16.39    1.41 
  17  -1  -1   14.14    1.23 
  17  -1  -1   15.29    1.07 
 -17   1   1   12.34    1.00 
  17   1  -1   14.06    1.27 
  17   1  -1   16.80    1.31 
  17   1  -1   17.07    1.30 
  17   1  -1   15.14    1.25 
 -17   1   1   16.08    1.56 
 -17   1   1   14.32    1.39 
  17   1  -1   14.49    1.19 
  17   1  -1   15.58    1.08 
 -17   1   1   17.10    1.25 
  15  -1  -1    1.29    0.56 
  15  -1  -1    1.36    0.65 
  15  -1  -1    1.10    0.53 
 -15  -1   1    1.97    0.59 
 -15  -1   1    0.52    0.55 
 -15  -1   1    0.95    0.44 
 -15  -1   1    0.86    0.59 
  15  -1  -1    0.73    0.56 
  15  -1  -1    1.30    0.46 
  15  -1  -1    0.84    0.49 
 -15  -1   1    1.52    0.55 
 -15   1   1    0.95    0.57 
 -15   1   1    1.37    0.57 
  15   1  -1    1.39    0.59 
 -15   1   1    1.51    0.44 
  15   1  -1    0.66    0.53 
  15   1  -1    1.20    0.56 
 -15   1   1    0.95    0.71 
  15   1  -1    1.24    0.49 
  15   1  -1    0.99    0.47 
  15   1  -1    1.25    0.60 
 -13  -1   1    0.90    0.41 
  13  -1  -1    2.01    0.46 
  13  -1  -1    1.03    0.53 
 -13  -1   1    1.82    0.54 
 -13  -1   1    1.33    0.53 
 -13  -1   1    1.68    0.49 
 -13  -1   1    0.76    0.50 
  13  -1  -1    1.74    0.40 
  13  -1  -1    1.70    0.53 
  13  -1  -1    1.31    0.46 
  13  -1  -1    1.15    0.48 
 -13   1   1    2.13    0.48 
 -13   1   1    1.40    0.54 
 -13   1   1    1.87    0.41 
  13   1  -1    2.34    0.61 
  13   1  -1    1.91    0.45 
 -13   1   1    1.21    0.65 
  13   1  -1    0.87    0.48 
  13   1  -1    1.23    0.48 
  13   1  -1    2.35    0.52 
  13   1  -1    2.24    0.54 
  11  -1  -1    5.02    0.62 
 -11  -1   1    4.56    0.56 
  11  -1  -1    5.20    0.68 
  11  -1  -1    4.63    0.62 
 -11  -1   1    4.86    0.59 
  11  -1  -1    4.01    0.46 
 -11  -1   1    4.54    0.62 
  11  -1  -1    4.81    0.63 
 -11  -1   1    6.02    0.63 
 -11  -1   1    4.44    0.56 
  11  -1  -1    4.46    0.54 
  11   1  -1    4.11    0.54 
 -11   1   1    4.75    0.71 
  11   1  -1    5.06    0.63 
  11   1  -1    4.46    0.58 
 -11   1   1    4.61    0.64 
 -11   1   1    4.78    0.51 
 -11   1   1    4.92    0.63 
  11   1  -1    5.24    0.57 
  11   1  -1    4.76    0.59 
  -9  -1   1   57.48    1.53 
   9  -1  -1   56.57    1.35 
   9  -1  -1   62.51    1.52 
   9  -1  -1   58.18    1.58 
  -9  -1   1   58.10    1.42 
   9  -1  -1   57.63    1.53 
  -9  -1   1   58.49    1.46 
  -9  -1   1   59.29    1.56 
   9  -1  -1   56.88    1.67 
   9  -1  -1   56.64    1.60 
  -9  -1   1   58.01    1.61 
   9   1  -1   58.50    1.50 
  -9   1   1   57.29    1.72 
   9   1  -1   56.70    1.41 
  -9   1   1   58.16    1.43 
   9   1  -1   55.95    1.48 
  -9   1   1   55.98    1.60 
  -9   1   1   57.95    1.60 
   9   1  -1   55.93    1.61 
   9   1  -1   56.33    1.43 
  -7  -1   1  193.34    3.35 
  -7  -1   1  198.67    3.73 
   7  -1  -1  195.82    3.60 
   7  -1  -1  191.43    3.30 
   7  -1  -1  193.29    3.56 
   7  -1  -1  197.71    3.76 
  -7  -1   1  195.83    3.38 
   7  -1  -1  190.08    3.63 
  -7  -1   1  196.24    3.49 
  -7  -1   1  192.44    3.62 
   7  -1  -1  194.23    3.46 
   7   1  -1  192.96    3.72 
   7   1  -1  199.04    3.47 
  -7   1   1  192.52    3.57 
   7   1  -1  198.68    3.42 
  -7   1   1  198.91    3.55 
  -7   1   1  196.74    3.50 
   7   1  -1  193.69    3.58 
  -7   1   1  194.59    3.63 
   7   1  -1  195.05    3.33 
   5  -1  -1  328.05    5.25 
   5  -1  -1  321.75    5.50 
   5  -1  -1  333.91    5.47 
   5  -1  -1  321.74    5.38 
  -5  -1   1  327.13    5.60 
   5  -1  -1  325.60    5.59 
   5  -1  -1  332.21    5.62 
   5  -1  -1  327.32    5.16 
  -5   1   1  328.39    5.51 
  -5   1   1  328.56    5.16 
   5   1  -1  326.55    5.27 
  -5   1   1  353.29    5.65 
  -5   1   1  338.03    5.59 
   5   1  -1  325.84    5.56 
   5   1  -1  330.98    5.24 
  -5   1   1  321.74    5.40 
   5   1  -1  318.55    5.66 
   5   1  -1  334.58    5.13 
   3  -1  -1  311.50    5.17 
   3  -1  -1  326.71    4.98 
   3  -1  -1  322.64    5.35 
   3  -1  -1  321.12    5.33 
   3  -1  -1  327.19    5.01 
  -3  -1   1  330.08    5.42 
  -3   1   1  325.26    5.29 
  -3   1   1  320.92    5.00 
  -3   1   1  332.71    5.00 
  -3   1   1  322.01    5.47 
  -3   1   1  325.04    5.35 
   3   1  -1  328.23    5.37 
  -3   1   1  320.22    5.30 
   3   1  -1  315.24    5.26 
   3   1  -1  324.09    5.46 
   1  -1  -1  257.79    4.14 
   1  -1  -1  245.89    4.08 
   1  -1  -1  230.70    3.99 
  -1  -1   1  259.76    4.20 
  -1  -1   1  243.81    3.99 
   1  -1  -1  258.50    4.24 
  -1  -1   1  250.91    4.18 
   1  -1  -1  247.60    4.21 
  -1   1   1  249.67    4.12 
   1   1  -1  249.94    4.00 
   1   1  -1  261.49    4.21 
  -1   1   1  254.78    3.99 
  -1   1   1  241.63    4.20 
   1   1  -1  252.03    4.18 
   1   1  -1  255.84    3.97 
  -1   1   1  252.33    4.02 
  -1   1   1  250.88    4.09 
   1  -1   1  273.29    4.31 
  -1  -1  -1  266.94    4.38 
  -1  -1  -1  260.80    4.34 
   1  -1   1  271.30    4.48 
  -1  -1  -1  287.98    4.67 
   1  -1   1  267.81    4.32 
  -1  -1  -1  259.69    4.26 
   1  -1   1  274.22    4.23 
  -1   1  -1  271.66    4.30 
   1   1   1  263.18    4.26 
   1   1   1  264.18    4.36 
   1   1   1  264.54    4.61 
  -1   1  -1  276.29    4.23 
  -1   1  -1  266.11    4.44 
  -1   1  -1  278.04    4.36 
  -1   1  -1  276.32    4.36 
   1   1   1  266.88    4.36 
  -1   1  -1  261.98    4.31 
   3  -1   1  588.16    9.40 
  -3  -1  -1  590.52    9.36 
  -3  -1  -1  590.23    9.16 
   3  -1   1  608.86    9.57 
   3  -1   1  595.28    9.23 
   3  -1   1  595.18    9.06 
  -3  -1  -1  583.47    9.36 
   3  -1   1  599.09    9.46 
   3  -1   1  593.63    9.21 
  -3  -1  -1  582.96    9.82 
  -3   1  -1  593.15    9.47 
   3   1   1  601.24    9.82 
   3   1   1  613.89    9.06 
   3   1   1  604.11    9.37 
  -3   1  -1  597.10    9.22 
   3   1   1  592.25    9.34 
  -3   1  -1  601.33    9.23 
  -3   1  -1  609.94    9.53 
  -3   1  -1  592.97    9.38 
  -5  -1  -1    1.03    0.28 
   5  -1   1    1.44    0.24 
  -5  -1  -1    1.22    0.33 
  -5  -1  -1    1.15    0.31 
   5  -1   1    1.61    0.32 
   5  -1   1    1.35    0.27 
   5  -1   1    1.45    0.33 
  -5  -1  -1    1.32    0.26 
   5  -1   1    1.95    0.32 
  -5  -1  -1    1.12    0.29 
   5   1   1    1.46    0.28 
   5   1   1    1.31    0.32 
   5   1   1    1.31    0.31 
  -5   1  -1    1.60    0.29 
  -5   1  -1    1.94    0.24 
  -5   1  -1    1.35    0.34 
  -5   1  -1    1.44    0.33 
   5   1   1    1.51    0.29 
  -5   1  -1    1.44    0.31 
  -7  -1  -1   16.76    0.85 
  -7  -1  -1   17.29    0.78 
   7  -1   1   16.98    0.86 
  -7  -1  -1   17.50    0.82 
   7  -1   1   16.91    0.67 
  -7  -1  -1   16.44    0.84 
   7  -1   1   15.33    0.81 
  -7  -1  -1   18.37    0.78 
   7  -1   1   17.58    0.84 
   7  -1   1   17.12    0.81 
   7   1   1   19.33    0.79 
   7   1   1   17.03    0.84 
  -7   1  -1   16.48    0.79 
  -7   1  -1   17.19    0.63 
  -7   1  -1   16.28    0.82 
   7   1   1   16.99    0.76 
  -7   1  -1   17.42    0.93 
   7   1   1   16.68    0.79 
  -7   1  -1   16.46    0.77 
   7   1   1   17.20    0.78 
   7   1   1   17.60    0.79 
   9  -1   1   25.21    1.17 
  -9  -1  -1   24.89    1.03 
  -9  -1  -1   25.33    1.11 
   9  -1   1   25.06    0.89 
   9  -1   1   25.66    1.09 
  -9  -1  -1   24.13    1.12 
  -9  -1  -1   26.10    1.13 
   9  -1   1   26.61    1.10 
   9  -1   1   24.47    1.07 
   9   1   1   26.26    1.12 
  -9   1  -1   25.95    1.25 
  -9   1  -1   25.54    1.09 
   9   1   1   26.83    1.05 
   9   1   1   28.17    1.11 
   9   1   1   25.12    1.02 
  -9   1  -1   26.16    1.11 
   9   1   1   26.38    1.07 
   9   1   1   26.52    1.04 
  -9   1  -1   28.20    0.90 
  -9   1  -1   27.50    1.09 
  11  -1   1    4.01    0.54 
 -11  -1  -1    3.22    0.62 
 -11  -1  -1    1.86    0.50 
  11  -1   1    3.13    0.55 
  11  -1   1    3.04    0.62 
  11  -1   1    2.41    0.52 
 -11  -1  -1    2.99    0.63 
  11  -1   1    2.66    0.58 
 -11  -1  -1    3.15    0.58 
  11   1   1    2.87    0.59 
  11   1   1    3.09    0.59 
  11   1   1    3.28    0.59 
 -11   1  -1    3.81    0.68 
  11   1   1    2.77    0.57 
 -11   1  -1    3.03    0.61 
 -11   1  -1    3.32    0.55 
  11   1   1    2.89    0.53 
  11   1   1    2.93    0.51 
 -11   1  -1    2.26    0.55 
 -11   1  -1    2.46    0.43 
  13  -1   1   20.71    0.99 
  13  -1   1   21.76    1.27 
  13  -1   1   20.52    0.88 
  13  -1   1   20.09    1.32 
 -13  -1  -1   21.76    1.20 
 -13  -1  -1   19.40    1.18 
 -13  -1  -1   20.37    1.15 
  13  -1   1   22.32    1.28 
  13  -1   1   23.27    1.26 
 -13  -1  -1   20.79    1.28 
 -13   1  -1   20.85    1.24 
 -13   1  -1   21.55    1.28 
  13   1   1   22.01    1.22 
 -13   1  -1   22.76    1.43 
 -13   1  -1   21.56    0.99 
  13   1   1   22.07    1.28 
 -13   1  -1   21.42    1.20 
  13   1   1   23.27    1.22 
  13   1   1   21.04    1.23 
  13   1   1   20.23    1.08 
  13   1   1   19.84    1.23 
 -15  -1  -1    2.32    0.68 
  15  -1   1    3.01    0.77 
 -15  -1  -1    3.42    0.74 
  15  -1   1    2.67    0.72 
 -15  -1  -1    3.29    0.77 
  15  -1   1    3.03    0.58 
  15  -1   1    2.57    0.78 
  15  -1   1    2.88    0.50 
  15  -1   1    2.79    0.63 
 -15  -1  -1    3.19    0.79 
 -15   1  -1    3.16    0.64 
  15   1   1    2.65    0.81 
  15   1   1    2.12    0.64 
  15   1   1    2.99    0.81 
  15   1   1    3.48    0.78 
 -15   1  -1    3.41    0.68 
 -15   1  -1    3.14    0.95 
 -15   1  -1    2.11    0.71 
  15   1   1    2.36    0.63 
 -15   1  -1    2.41    0.69 
  15   1   1    2.89    0.75 
  17  -1   1    9.66    1.20 
 -17  -1  -1   10.40    1.20 
  17  -1   1    9.66    1.24 
 -17  -1  -1    8.60    1.07 
  17  -1   1    6.83    0.96 
  17  -1   1    9.19    1.15 
  17  -1   1    7.66    0.95 
  17  -1   1    7.36    0.94 
 -17  -1  -1    9.18    1.18 
 -17  -1  -1    8.98    1.16 
  17   1   1   10.41    1.34 
  17   1   1    7.77    1.02 
  17   1   1    7.45    0.98 
  17   1   1    8.08    1.12 
  17   1   1    6.49    1.08 
 -17   1  -1    7.45    1.01 
 -17   1  -1    7.71    1.21 
  17   1   1    7.10    1.03 
 -17   1  -1    8.08    1.12 
 -17   1  -1    7.40    1.23 
 -17   1  -1    7.49    0.91 
 -19  -1  -1   31.83    1.94 
  19  -1   1   31.26    2.14 
 -19  -1  -1   33.66    1.86 
 -19  -1  -1   36.01    1.92 
  19  -1   1   33.21    1.60 
  19  -1   1   37.49    1.51 
  19  -1   1   35.09    2.12 
 -19  -1  -1   31.74    2.07 
  19  -1   1   32.38    1.93 
  19  -1   1   30.79    1.89 
  19   1   1   34.25    1.92 
  19   1   1   29.56    1.61 
 -19   1  -1   35.00    2.23 
  19   1   1   29.61    2.06 
  19   1   1   36.27    2.08 
 -19   1  -1   33.41    1.86 
  19   1   1   31.67    1.90 
  19   1   1   32.34    1.84 
 -19   1  -1   29.30    1.99 
 -19   1  -1   34.65    1.74 
 -21  -1  -1   21.33    2.02 
 -21  -1  -1   18.69    1.78 
  21  -1   1   19.91    1.45 
  21  -1   1   20.49    1.54 
 -21  -1  -1   19.54    1.95 
  21  -1   1   19.32    1.81 
  21  -1   1   23.21    2.11 
  21  -1   1   18.56    1.93 
  21  -1   1   22.59    2.13 
 -21  -1  -1   20.46    1.76 
  21   1   1   19.01    2.15 
 -21   1  -1   18.82    1.74 
  21   1   1   22.53    1.79 
  21   1   1   20.98    1.90 
 -21   1  -1   23.85    2.39 
 -21   1  -1   20.71    1.69 
 -21   1  -1   20.44    2.08 
  21   1   1   21.31    2.04 
  21   1   1   19.81    1.58 
  21   1   1   21.65    1.87 
  23  -1   1    8.12    1.73 
  23  -1   1    6.76    1.08 
 -23  -1  -1    5.82    1.43 
 -23  -1  -1    9.78    1.75 
 -23  -1  -1    8.35    1.48 
  23  -1   1    6.56    1.68 
  23  -1   1    7.28    1.24 
  23  -1   1    7.39    1.47 
  23   1   1    8.62    1.47 
  23   1   1    5.61    1.63 
 -23   1  -1    7.33    1.37 
 -23   1  -1    4.70    1.50 
 -23   1  -1    5.46    1.49 
  23   1   1    6.14    1.05 
  23   1   1    8.08    1.44 
  23   1   1    7.07    1.40 
 -23   1  -1    6.80    1.59 
  25  -1   1    4.23    1.12 
  25  -1   1    2.25    1.46 
 -25  -1  -1    5.65    1.60 
 -25  -1  -1    5.73    1.61 
  25  -1   1    4.46    1.84 
 -25  -1  -1    3.36    1.61 
  25  -1   1    6.29    1.34 
  25   1   1    5.15    1.69 
 -25   1  -1    5.92    1.52 
  25   1   1    3.67    1.51 
  25   1   1    4.28    1.17 
 -25   1  -1    5.91    1.76 
 -25   1  -1    4.50    1.51 
  25   1   1    3.41    1.71 
  25   1   1    4.46    1.45 
 -25   1  -1    7.84    1.93 
  27  -1   1    7.41    1.79 
  27  -1   1   14.06    2.48 
  27  -1   1   11.69    2.31 
  27  -1   1    8.04    1.67 
  27  -1   1    7.83    1.48 
 -27  -1  -1    6.80    2.18 
 -27  -1  -1    7.51    2.02 
  27   1   1    6.26    1.47 
  27   1   1    7.60    2.16 
  27   1   1    7.91    1.81 
 -27   1  -1   10.28    2.19 
  27   1   1    6.65    1.73 
 -27   1  -1    6.17    2.20 
 -27   1  -1   10.26    1.88 
  29  -1   1   12.84    2.08 
 -29  -1  -1    9.72    2.64 
 -29  -1  -1   16.18    2.84 
 -29  -1  -1   12.10    2.54 
  29  -1   1   15.93    2.38 
  29   1   1   11.04    2.09 
  29   1   1    9.38    2.19 
  29   1   1   14.56    2.01 
 -29   1  -1   15.32    2.73 
  29   1   1    7.08    2.62 
 -29   1  -1   11.94    2.86 
  31  -1   1    5.15    2.48 
 -31  -1  -1    5.25    2.73 
 -31  -1  -1    6.93    3.10 
  31  -1   1    5.70    2.64 
  31  -1   1    7.49    2.22 
  31   1   1    3.72    1.95 
 -31   1  -1    1.63    2.90 
  31   1   1    6.04    3.14 
  31   1   1    3.88    2.26 
 -31   1  -1    4.68    2.78 
  33  -1   1    0.24    2.83 
 -33  -1  -1    0.57    3.10 
 -33  -1  -1   -0.77    3.31 
  33  -1   1    3.29    2.73 
 -33   1  -1   -2.59    3.56 
  33   1   1    6.05    3.12 
 -33   1  -1   -0.68    3.20 
  33   1   1    3.80    2.90 
  33   1   1    3.19    2.31 
  34  -2  -1    9.83    2.82 
 -34  -2   1   13.51    3.61 
 -34  -2   1    8.62    3.54 
  34  -2  -1   17.04    3.11 
  34  -2  -1   11.60    3.06 
 -34   2   1    6.59    3.66 
  34   2  -1    9.31    2.69 
  34   2  -1    8.72    3.35 
 -34   2   1   17.77    3.79 
  34   2  -1    3.82    2.86 
 -32  -2   1    6.49    2.90 
 -32  -2   1    6.10    2.86 
  32  -2  -1    4.98    2.67 
  32  -2  -1    7.72    2.45 
  32  -2  -1    7.90    2.48 
 -32  -2   1    6.78    2.89 
 -32   2   1    1.48    2.86 
  32   2  -1    1.32    2.88 
  32   2  -1    1.33    1.93 
  32   2  -1    7.71    2.52 
 -32   2   1    5.39    3.47 
  32   2  -1    7.24    2.79 
 -30  -2   1    1.84    2.30 
  30  -2  -1    5.19    2.02 
 -30  -2   1   -0.78    2.21 
  30  -2  -1   -1.30    1.85 
  30  -2  -1    2.16    2.07 
 -30  -2   1   -0.64    2.14 
 -30   2   1    5.44    2.46 
  30   2  -1    0.95    1.57 
 -30   2   1   -0.77    2.20 
  30   2  -1    0.18    2.23 
  30   2  -1    1.83    1.86 
  30   2  -1   -0.73    2.26 
 -28  -2   1   -0.20    1.87 
  28  -2  -1    3.35    2.21 
  28  -2  -1    1.86    1.85 
 -28  -2   1    6.35    2.04 
  28  -2  -1    4.53    2.31 
  28  -2  -1    2.06    1.68 
  28  -2  -1    4.16    1.61 
  28   2  -1    2.02    1.95 
  28   2  -1    1.62    1.51 
 -28   2   1    3.10    2.20 
 -28   2   1    3.26    1.95 
  28   2  -1    2.64    1.39 
 -28   2   1   -0.26    1.69 
 -28   2   1    3.72    1.69 
  28   2  -1    2.70    1.80 
 -26  -2   1    4.10    1.63 
  26  -2  -1    3.54    1.83 
  26  -2  -1    2.45    1.42 
  26  -2  -1    2.36    1.36 
  26  -2  -1    1.56    1.44 
 -26  -2   1    1.47    1.63 
  26   2  -1    1.78    1.57 
  26   2  -1    0.52    1.09 
  26   2  -1    3.28    1.67 
  26   2  -1    1.60    1.58 
  26   2  -1    0.88    1.29 
  26   2  -1    1.29    1.59 
 -26   2   1    0.57    1.88 
 -26   2   1    0.95    1.33 
 -26   2   1    0.66    1.61 
  24  -2  -1   14.93    1.74 
  24  -2  -1   13.25    1.80 
  24  -2  -1   14.97    2.11 
  24  -2  -1   15.49    1.61 
 -24  -2   1   15.22    1.98 
 -24  -2   1   16.49    1.94 
  24  -2  -1   13.33    1.80 
  24  -2  -1   14.40    1.82 
  24   2  -1   18.37    2.24 
 -24   2   1   13.46    2.05 
  24   2  -1   17.37    2.23 
  24   2  -1   17.01    1.91 
  24   2  -1   16.31    1.75 
  24   2  -1   13.05    1.72 
 -24   2   1   11.02    1.46 
 -24   2   1   16.23    1.96 
  24   2  -1   13.35    1.77 
 -24   2   1   16.94    2.13 
  22  -2  -1    6.00    1.18 
  22  -2  -1    7.46    1.42 
 -22  -2   1    8.13    1.35 
  22  -2  -1    8.52    1.48 
  22  -2  -1    5.12    1.27 
 -22  -2   1    5.08    1.33 
  22  -2  -1    5.96    1.16 
  22  -2  -1    8.42    1.49 
 -22  -2   1    7.22    1.36 
  22   2  -1    6.01    1.03 
  22   2  -1    9.56    1.47 
 -22   2   1    6.22    1.11 
  22   2  -1    7.17    1.39 
  22   2  -1    3.10    1.20 
 -22   2   1    8.30    1.95 
 -22   2   1    6.28    1.37 
  22   2  -1    5.68    1.35 
 -22   2   1    5.74    1.25 
  22   2  -1    7.36    1.20 
 -20  -2   1   12.04    1.56 
  20  -2  -1   11.04    1.44 
  20  -2  -1   11.51    1.41 
  20  -2  -1   12.04    1.41 
  20  -2  -1   11.53    1.41 
 -20  -2   1   13.51    1.66 
 -20  -2   1   10.99    1.43 
  20  -2  -1   12.04    1.23 
  20  -2  -1   13.17    1.63 
 -20   2   1   14.65    1.62 
  20   2  -1   11.78    1.38 
  20   2  -1   13.36    1.63 
 -20   2   1   11.01    1.75 
  20   2  -1   14.41    1.67 
 -20   2   1   13.33    1.22 
 -20   2   1   11.23    1.49 
  20   2  -1   12.83    1.25 
  20   2  -1   12.12    1.45 
  20   2  -1   14.31    1.55 
  18  -2  -1   13.79    1.32 
 -18  -2   1   13.18    1.40 
 -18  -2   1   12.55    1.49 
 -18  -2   1   15.54    1.48 
  18  -2  -1   13.28    1.23 
  18  -2  -1   12.19    1.50 
  18  -2  -1   11.33    1.41 
 -18  -2   1   15.98    1.54 
  18  -2  -1   13.30    1.58 
  18  -2  -1   11.89    1.37 
 -18   2   1   13.64    1.60 
 -18   2   1   13.04    1.39 
  18   2  -1   12.04    1.32 
 -18   2   1   12.05    1.52 
  18   2  -1   12.19    1.45 
  18   2  -1   12.06    1.42 
 -18   2   1   14.14    1.14 
  18   2  -1   13.64    1.18 
  18   2  -1   15.32    1.47 
  18   2  -1   11.59    1.24 
 -16  -2   1   25.38    1.56 
 -16  -2   1   26.56    1.52 
  16  -2  -1   25.72    1.40 
  16  -2  -1   22.36    1.50 
  16  -2  -1   23.06    1.48 
  16  -2  -1   26.55    1.68 
 -16  -2   1   24.67    1.42 
  16  -2  -1   24.44    1.61 
 -16  -2   1   24.52    1.49 
  16  -2  -1   24.13    1.19 
 -16   2   1   26.74    1.64 
  16   2  -1   26.30    1.50 
 -16   2   1   24.37    1.44 
 -16   2   1   27.88    1.28 
  16   2  -1   27.99    1.43 
  16   2  -1   27.47    1.36 
  16   2  -1   23.73    1.54 
  16   2  -1   26.40    1.46 
  16   2  -1   24.66    1.32 
 -16   2   1   21.15    1.68 
 -14  -2   1   72.59    2.15 
 -14  -2   1   67.79    1.99 
  14  -2  -1   69.23    2.39 
 -14  -2   1   71.63    2.26 
  14  -2  -1   72.08    2.25 
  14  -2  -1   68.43    1.79 
  14  -2  -1   72.44    2.20 
 -14  -2   1   73.20    2.34 
  14  -2  -1   69.65    2.11 
  14  -2  -1   68.66    2.26 
 -14   2   1   71.23    2.48 
  14   2  -1   72.83    2.06 
 -14   2   1   69.89    2.29 
 -14   2   1   71.42    1.95 
  14   2  -1   69.54    1.98 
  14   2  -1   74.62    2.36 
  14   2  -1   69.97    2.09 
 -14   2   1   69.42    2.22 
 -14   2   1   67.38    2.17 
  14   2  -1   73.41    2.02 
  12  -2  -1   41.93    1.71 
 -12  -2   1   40.29    1.60 
 -12  -2   1   39.74    1.42 
  12  -2  -1   41.23    1.60 
  12  -2  -1   39.94    1.48 
  12  -2  -1   39.04    1.48 
 -12  -2   1   39.22    1.60 
  12  -2  -1   38.35    1.57 
 -12  -2   1   40.40    1.37 
  12  -2  -1   39.23    1.17 
  12   2  -1   39.87    1.29 
 -12   2   1   40.43    1.62 
 -12   2   1   40.17    1.79 
 -12   2   1   40.79    1.34 
  12   2  -1   40.19    1.38 
  12   2  -1   38.75    1.32 
 -12   2   1   38.36    1.49 
  12   2  -1   38.68    1.44 
  12   2  -1   41.83    1.66 
 -12   2   1   39.16    1.52 
  10  -2  -1    5.17    0.66 
  10  -2  -1    6.41    0.69 
  10  -2  -1    5.68    0.72 
  10  -2  -1    5.17    0.71 
  10  -2  -1    3.95    0.49 
 -10  -2   1    5.55    0.65 
  10  -2  -1    6.10    0.71 
 -10  -2   1    5.62    0.72 
 -10  -2   1    5.47    0.62 
 -10  -2   1    4.63    0.60 
  10  -2  -1    6.03    0.72 
 -10   2   1    5.77    0.68 
 -10   2   1    5.76    0.77 
 -10   2   1    4.75    0.61 
  10   2  -1    4.97    0.60 
 -10   2   1    5.28    0.63 
 -10   2   1    6.58    0.79 
  10   2  -1    5.89    0.75 
  10   2  -1    5.35    0.52 
  10   2  -1    5.83    0.71 
  10   2  -1    5.76    0.60 
   8  -2  -1   17.69    0.91 
   8  -2  -1   19.45    0.98 
   8  -2  -1   18.17    0.84 
  -8  -2   1   18.70    0.98 
  -8  -2   1   17.95    0.75 
   8  -2  -1   18.19    1.00 
   8  -2  -1   18.66    0.98 
   8  -2  -1   18.65    0.93 
  -8   2   1   20.29    0.93 
  -8   2   1   19.54    1.00 
   8   2  -1   20.19    0.71 
   8   2  -1   21.09    0.76 
  -8   2   1   20.50    1.09 
   8   2  -1   19.63    0.93 
  -8   2   1   19.37    0.90 
   8   2  -1   18.79    1.02 
  -8   2   1   19.34    0.86 
   6  -2  -1   21.72    0.80 
   6  -2  -1   21.97    0.92 
   6  -2  -1   20.94    1.01 
  -6  -2   1   20.99    0.97 
   6  -2  -1   20.52    0.94 
   6  -2  -1   21.64    0.92 
  -6   2   1   22.25    0.88 
  -6   2   1   21.30    0.93 
   6   2  -1   21.44    0.90 
  -6   2   1   21.74    0.90 
  -6   2   1   22.13    1.01 
  -6   2   1   21.43    1.02 
  -6   2   1   21.31    0.80 
   6   2  -1   20.77    0.98 
   4  -2  -1   96.76    2.29 
   4  -2  -1   94.55    2.14 
   4  -2  -1   98.22    2.04 
  -4  -2   1   97.29    2.24 
   4  -2  -1   99.66    2.11 
  -4   2   1   95.88    2.05 
  -4   2   1   95.15    2.23 
   4   2  -1   94.70    2.22 
   4   2  -1   99.16    2.26 
  -4   2   1   98.61    2.16 
  -4   2   1  100.04    2.08 
   4   2  -1   97.05    2.16 
   2  -2  -1    8.17    0.52 
   2  -2  -1    7.02    0.66 
  -2  -2   1    6.60    0.53 
   2  -2  -1    7.32    0.51 
  -2  -2   1    7.48    0.66 
   2  -2  -1    6.97    0.50 
   2  -2  -1    7.95    0.56 
   2   2  -1    5.89    0.52 
  -2   2   1    6.97    0.39 
  -2   2   1    6.60    0.52 
   2   2  -1    5.44    0.66 
   2   2  -1    5.05    0.46 
  -2   2   1    6.98    0.69 
  -2   2   1    5.82    0.55 
  -2   2   1    6.44    0.48 
   0  -2  -1  273.50    5.08 
   0  -2  -1  279.39    4.63 
   0  -2  -1  290.38    5.12 
   0  -2   1  281.67    5.10 
   0  -2   1  278.80    4.67 
   0  -2   1  297.14    4.94 
   0  -2  -1  273.64    4.68 
   0   2  -1  293.48    4.53 
   0   2   1  284.35    5.06 
   0   2  -1  295.72    4.95 
   0   2   1  285.23    4.72 
   0   2   1  274.14    4.61 
   0   2   1  280.62    4.77 
   0   2  -1  286.52    5.08 
   0   2   1  273.37    5.11 
  -2  -2  -1  628.28   10.11 
   2  -2   1  646.49   10.60 
   2  -2   1  653.87   10.17 
   2  -2   1  646.45   10.38 
   2  -2   1  659.81    9.96 
   2  -2   1  629.16   10.03 
  -2  -2  -1  654.70   10.87 
   2  -2   1  664.92   10.22 
  -2   2  -1  647.10   10.39 
  -2   2  -1  628.28   10.49 
  -2   2  -1  655.02    9.97 
   2   2   1  632.77   10.14 
   2   2   1  657.82   10.80 
  -2   2  -1  668.06   10.27 
  -2   2  -1  622.40   10.00 
   2   2   1  631.80   10.14 
   2   2   1  634.29   10.58 
  -2   2  -1  658.54   10.15 
   4  -2   1   84.14    1.90 
  -4  -2  -1   85.00    1.78 
  -4  -2  -1   84.60    1.81 
   4  -2   1   87.39    2.11 
   4  -2   1   87.88    1.90 
  -4  -2  -1   85.48    2.17 
   4  -2   1   85.96    1.85 
  -4  -2  -1   84.86    1.76 
   4  -2   1   85.21    1.95 
   4   2   1   84.90    1.77 
   4   2   1   85.29    2.15 
  -4   2  -1   88.29    2.02 
  -4   2  -1   88.77    1.88 
   4   2   1   86.18    1.80 
  -4   2  -1   86.01    1.90 
  -4   2  -1   87.52    1.88 
  -4   2  -1   88.21    1.85 
  -6  -2  -1  174.57    3.23 
  -6  -2  -1  167.40    3.67 
   6  -2   1  172.09    3.30 
   6  -2   1  173.92    3.34 
   6  -2   1  174.89    3.39 
  -6  -2  -1  168.73    3.16 
  -6  -2  -1  173.24    3.15 
   6  -2   1  175.13    3.36 
   6  -2   1  172.96    3.47 
  -6  -2  -1  170.22    3.24 
   6  -2   1  173.10    3.52 
   6   2   1  171.99    3.23 
   6   2   1  172.86    3.13 
  -6   2  -1  170.15    3.33 
  -6   2  -1  175.86    3.38 
   6   2   1  168.62    3.66 
  -6   2  -1  179.87    3.58 
  -6   2  -1  171.22    3.22 
  -6   2  -1  173.57    3.34 
   6   2   1  167.00    3.60 
   8  -2   1  193.57    3.89 
  -8  -2  -1  192.43    3.55 
  -8  -2  -1  190.12    3.61 
   8  -2   1  189.27    3.82 
   8  -2   1  188.60    3.72 
   8  -2   1  192.99    3.74 
  -8  -2  -1  186.97    4.06 
   8  -2   1  193.15    3.70 
  -8  -2  -1  191.70    3.68 
   8  -2   1  185.75    3.89 
  -8  -2  -1  191.92    3.55 
   8   2   1  187.93    3.63 
  -8   2  -1  189.74    4.00 
  -8   2  -1  187.63    3.72 
   8   2   1  187.94    3.57 
   8   2   1  179.90    3.90 
   8   2   1  189.70    3.53 
  -8   2  -1  190.27    3.77 
  -8   2  -1  188.38    3.77 
  -8   2  -1  189.67    3.54 
   8   2   1  183.53    4.05 
 -10  -2  -1   53.26    1.89 
 -10  -2  -1   50.67    1.56 
  10  -2   1   51.67    1.73 
  10  -2   1   52.90    1.56 
 -10  -2  -1   51.12    1.66 
  10  -2   1   51.29    1.70 
 -10  -2  -1   52.80    1.61 
  10  -2   1   52.00    1.73 
  10  -2   1   50.67    1.80 
 -10   2  -1   50.87    1.73 
  10   2   1   53.31    1.61 
 -10   2  -1   52.86    1.91 
  10   2   1   51.67    1.72 
 -10   2  -1   50.61    1.67 
 -10   2  -1   50.26    1.70 
  10   2   1   52.59    1.85 
 -10   2  -1   52.45    1.42 
  10   2   1   52.62    1.59 
  10   2   1   51.42    1.54 
 -12  -2  -1   87.38    2.44 
 -12  -2  -1   86.47    2.29 
  12  -2   1   89.84    2.47 
  12  -2   1   85.49    2.47 
 -12  -2  -1   86.51    2.63 
 -12  -2  -1   86.62    2.62 
  12  -2   1   88.44    2.61 
 -12  -2  -1   87.88    2.31 
  12  -2   1   88.55    2.47 
  12  -2   1   90.02    2.29 
 -12   2  -1   87.79    2.45 
  12   2   1   90.26    2.36 
  12   2   1   86.96    2.59 
  12   2   1   86.13    2.42 
 -12   2  -1   87.63    2.51 
  12   2   1   87.79    2.29 
  12   2   1   89.70    2.33 
 -12   2  -1   88.75    2.13 
 -12   2  -1   88.47    2.49 
 -12   2  -1   92.42    2.78 
  14  -2   1   36.77    1.48 
  14  -2   1   35.29    1.66 
  14  -2   1   35.25    1.72 
 -14  -2  -1   37.66    1.59 
  14  -2   1   36.13    1.82 
 -14  -2  -1   38.92    1.73 
 -14  -2  -1   31.08    1.70 
  14  -2   1   32.99    1.65 
 -14  -2  -1   37.54    1.61 
 -14  -2  -1   35.83    1.82 
 -14   2  -1   37.47    1.36 
  14   2   1   37.27    1.60 
  14   2   1   34.11    1.65 
  14   2   1   37.68    1.60 
  14   2   1   33.69    1.54 
  14   2   1   34.34    1.51 
 -14   2  -1   34.10    1.73 
 -14   2  -1   35.77    1.64 
 -14   2  -1   35.47    1.95 
 -14   2  -1   34.53    1.68 
  16  -2   1   37.05    1.85 
  16  -2   1   36.90    1.89 
  16  -2   1   37.81    1.88 
 -16  -2  -1   35.84    1.90 
  16  -2   1   36.97    1.62 
 -16  -2  -1   37.55    1.78 
 -16  -2  -1   38.18    1.81 
 -16  -2  -1   39.40    2.02 
 -16  -2  -1   38.44    1.95 
  16  -2   1   33.46    2.00 
 -16   2  -1   36.40    1.88 
 -16   2  -1   36.84    1.93 
 -16   2  -1   36.71    2.14 
  16   2   1   38.44    1.79 
  16   2   1   34.37    1.66 
 -16   2  -1   38.18    1.82 
 -16   2  -1   38.95    1.50 
  16   2   1   39.04    1.82 
  16   2   1   36.08    1.94 
  16   2   1   37.22    1.81 
  16   2   1   37.91    1.76 
 -18  -2  -1   28.14    2.00 
 -18  -2  -1   27.03    1.82 
  18  -2   1   26.19    1.77 
 -18  -2  -1   29.93    1.84 
 -18  -2  -1   28.53    2.01 
  18  -2   1   28.59    1.58 
  18  -2   1   30.63    1.95 
  18  -2   1   27.33    2.07 
  18  -2   1   30.10    1.87 
 -18  -2  -1   29.79    1.83 
  18   2   1   30.29    1.74 
 -18   2  -1   31.01    2.02 
  18   2   1   27.50    1.80 
  18   2   1   28.00    1.76 
 -18   2  -1   27.98    1.92 
 -18   2  -1   24.76    1.68 
  18   2   1   27.38    1.85 
  18   2   1   27.67    1.62 
  18   2   1   25.92    1.88 
 -18   2  -1   28.16    1.47 
 -18   2  -1   26.67    2.11 
  20  -2   1   18.58    1.79 
  20  -2   1   23.09    1.63 
  20  -2   1   19.18    1.96 
 -20  -2  -1   20.06    1.86 
 -20  -2  -1   22.66    1.98 
 -20  -2  -1   22.32    2.09 
  20  -2   1   20.18    2.01 
  20  -2   1   20.98    2.24 
 -20  -2  -1   21.45    1.90 
 -20  -2  -1   19.96    2.01 
  20   2   1   17.93    1.98 
 -20   2  -1   20.12    1.56 
  20   2   1   21.99    1.72 
  20   2   1   24.13    2.03 
 -20   2  -1   24.39    2.30 
 -20   2  -1   22.68    2.12 
 -20   2  -1   20.33    1.76 
  20   2   1   23.27    1.85 
 -20   2  -1   20.63    2.03 
  20   2   1   20.99    1.64 
  20   2   1   22.14    1.90 
 -22  -2  -1   11.40    1.63 
  22  -2   1   11.03    1.57 
  22  -2   1   12.57    2.04 
  22  -2   1   12.62    1.70 
  22  -2   1   10.55    1.90 
 -22  -2  -1   10.34    1.53 
 -22  -2  -1   10.87    1.65 
  22  -2   1    8.75    1.63 
 -22  -2  -1   11.42    1.74 
 -22  -2  -1   10.74    1.63 
  22   2   1   12.66    1.63 
 -22   2  -1   13.59    1.79 
  22   2   1   11.51    1.56 
  22   2   1   11.56    1.48 
 -22   2  -1   11.16    1.35 
  22   2   1   10.83    1.60 
  22   2   1   10.73    1.54 
 -22   2  -1   12.62    2.11 
  22   2   1   12.04    1.69 
 -22   2  -1   10.76    1.54 
 -24  -2  -1    3.78    1.62 
 -24  -2  -1    0.96    1.50 
  24  -2   1    5.04    1.42 
 -24  -2  -1    1.53    1.51 
  24  -2   1    3.14    1.32 
  24  -2   1    2.75    1.72 
 -24  -2  -1    3.54    1.86 
  24  -2   1    2.61    1.69 
 -24  -2  -1    0.58    1.33 
 -24   2  -1    1.55    1.33 
  24   2   1    1.02    1.49 
 -24   2  -1    2.49    1.67 
  24   2   1    4.20    1.41 
  24   2   1    0.50    1.50 
  24   2   1    2.63    1.38 
  24   2   1    2.38    1.62 
 -24   2  -1    0.71    1.53 
  24   2   1    0.77    1.10 
 -26  -2  -1    5.75    1.89 
  26  -2   1    5.56    2.36 
 -26  -2  -1    4.57    2.07 
  26  -2   1    7.93    1.77 
  26  -2   1    5.62    1.78 
 -26  -2  -1    5.20    1.96 
  26  -2   1    5.46    1.72 
 -26   2  -1    7.04    1.89 
  26   2   1    3.33    1.65 
  26   2   1    6.76    1.88 
  26   2   1    5.25    1.49 
 -26   2  -1    5.49    2.11 
 -26   2  -1    2.36    1.81 
  26   2   1    3.57    2.06 
 -26   2  -1    6.36    1.69 
  26   2   1    5.14    1.89 
  28  -2   1    0.60    1.84 
 -28  -2  -1    0.43    2.15 
  28  -2   1    0.88    2.04 
  28  -2   1    0.44    1.87 
 -28  -2  -1    1.72    2.24 
 -28  -2  -1   -2.83    2.10 
  28   2   1   -0.76    1.43 
 -28   2  -1   -2.45    2.30 
 -28   2  -1    0.39    1.88 
 -28   2  -1    1.47    2.12 
  28   2   1    0.66    1.81 
  30  -2   1    0.95    2.22 
 -30  -2  -1   -3.23    2.79 
  30  -2   1    1.29    2.17 
 -30  -2  -1    4.76    2.73 
 -30  -2  -1   -0.41    2.51 
  30  -2   1   -4.15    2.37 
 -30   2  -1   -1.18    2.70 
  30   2   1    2.65    2.16 
 -30   2  -1    0.36    2.64 
  30   2   1    1.23    1.71 
 -32  -2  -1   14.91    3.52 
  32  -2   1   16.07    2.93 
  32  -2   1    9.36    3.20 
  32  -2   1   10.98    2.95 
 -32  -2  -1    9.75    3.54 
 -32   2  -1    9.28    3.28 
  32   2   1    9.77    2.86 
  32   2   1    9.09    2.33 
 -32   2  -1    7.30    3.63 
  33  -3  -1   -2.96    3.08 
  33  -3  -1    5.05    2.75 
  33  -3  -1   11.09    3.18 
  33  -3  -1    8.34    3.24 
 -33  -3   1    8.70    3.39 
 -33  -3   1   -0.16    3.30 
  33   3  -1   -1.37    2.24 
  33   3  -1    0.73    2.85 
 -33   3   1    1.40    3.36 
  33   3  -1    6.20    3.30 
 -33   3   1    2.81    3.54 
  31  -3  -1    6.44    2.28 
  31  -3  -1    4.40    2.73 
 -31  -3   1    5.24    2.77 
 -31  -3   1    1.83    2.78 
  31  -3  -1   10.40    2.72 
 -31   3   1    8.86    3.11 
  31   3  -1    4.71    2.34 
 -31   3   1    9.16    3.07 
  31   3  -1    3.21    1.92 
 -29  -3   1    8.11    2.37 
  29  -3  -1   14.93    2.03 
 -29  -3   1   11.15    2.67 
  29  -3  -1   11.89    2.36 
  29  -3  -1    9.92    2.37 
 -29  -3   1    9.64    2.57 
  29   3  -1   11.20    2.03 
  29   3  -1    6.12    1.80 
 -29   3   1   13.75    2.71 
 -29   3   1   14.48    2.75 
 -27  -3   1   -0.35    1.81 
 -27  -3   1   -1.87    1.87 
  27  -3  -1   -1.22    1.89 
  27  -3  -1   -0.65    1.40 
  27  -3  -1   -0.74    1.75 
 -27  -3   1    2.32    1.95 
  27   3  -1   -1.84    2.04 
 -27   3   1   -0.80    2.01 
  27   3  -1   -1.81    1.30 
 -27   3   1    4.22    2.37 
 -27   3   1   -3.04    1.52 
  27   3  -1    1.23    1.98 
  27   3  -1   -1.63    1.50 
 -25  -3   1    4.52    1.57 
  25  -3  -1    0.90    1.60 
 -25  -3   1    2.83    1.65 
  25  -3  -1    5.73    1.27 
  25  -3  -1    5.30    1.63 
 -25  -3   1   -0.04    1.62 
  25  -3  -1    3.58    1.87 
  25  -3  -1    3.20    2.00 
  25   3  -1    3.99    1.70 
 -25   3   1    1.25    1.69 
  25   3  -1    3.57    1.38 
  25   3  -1    2.31    1.30 
  25   3  -1    5.79    1.76 
 -25   3   1    5.98    1.91 
 -25   3   1    0.94    1.27 
 -25   3   1    0.95    1.54 
  23  -3  -1    5.89    1.61 
  23  -3  -1    5.49    1.84 
  23  -3  -1    4.08    1.40 
 -23  -3   1    4.29    1.31 
 -23  -3   1    1.88    1.33 
  23  -3  -1    5.80    1.23 
  23  -3  -1    2.13    1.65 
  23  -3  -1    4.05    1.46 
  23  -3  -1    3.35    1.43 
 -23  -3   1    3.83    1.48 
  23   3  -1    4.91    1.50 
  23   3  -1    7.40    1.29 
  23   3  -1    3.71    1.37 
  23   3  -1    3.29    1.57 
  23   3  -1    4.39    1.20 
 -23   3   1    4.74    1.67 
 -23   3   1    0.49    1.36 
  23   3  -1    3.99    1.45 
 -23   3   1    3.97    1.11 
  21  -3  -1   14.35    1.78 
 -21  -3   1   14.43    1.58 
  21  -3  -1   15.52    1.87 
  21  -3  -1   15.67    1.46 
 -21  -3   1   16.14    1.77 
 -21  -3   1   14.99    1.79 
  21  -3  -1   15.50    1.82 
  21  -3  -1   15.62    1.87 
  21  -3  -1   16.89    1.98 
 -21  -3   1   16.76    1.96 
  21  -3  -1   17.24    1.86 
 -21   3   1   13.51    1.79 
  21   3  -1   15.13    1.57 
 -21   3   1   14.78    1.93 
  21   3  -1   13.89    1.63 
  21   3  -1   15.68    1.68 
  21   3  -1   15.22    1.74 
 -21   3   1   21.97    2.43 
  21   3  -1   13.06    1.71 
  21   3  -1   14.17    1.85 
 -21   3   1   18.40    1.66 
 -19  -3   1   26.14    1.69 
 -19  -3   1   26.58    2.07 
 -19  -3   1   25.97    1.91 
  19  -3  -1   23.37    1.93 
  19  -3  -1   26.46    1.97 
  19  -3  -1   26.50    1.41 
  19  -3  -1   24.14    2.19 
 -19  -3   1   25.33    1.81 
  19  -3  -1   24.10    2.04 
  19  -3  -1   25.65    1.82 
  19  -3  -1   21.63    1.92 
 -19  -3   1   23.56    2.13 
 -19   3   1   20.45    2.05 
  19   3  -1   25.60    1.89 
 -19   3   1   23.00    1.84 
  19   3  -1   25.98    1.73 
 -19   3   1   25.92    2.31 
 -19   3   1   23.48    1.53 
  19   3  -1   24.94    1.73 
  19   3  -1   26.86    1.64 
  19   3  -1   21.80    2.04 
  17  -3  -1   51.06    1.61 
  17  -3  -1   50.86    2.44 
  17  -3  -1   48.73    2.19 
 -17  -3   1   45.39    1.94 
 -17  -3   1   47.47    2.14 
  17  -3  -1   49.46    2.24 
 -17  -3   1   50.62    2.34 
  17  -3  -1   49.76    2.25 
 -17  -3   1   50.48    1.92 
  17  -3  -1   48.47    2.25 
  17  -3  -1   50.70    2.14 
 -17  -3   1   49.84    2.38 
  17   3  -1   50.84    2.15 
 -17   3   1   49.28    2.54 
  17   3  -1   50.91    1.91 
  17   3  -1   48.83    2.07 
 -17   3   1   53.63    1.93 
 -17   3   1   49.44    2.16 
 -17   3   1   47.89    2.37 
  17   3  -1   48.89    2.37 
  17   3  -1   50.45    1.97 
  15  -3  -1   17.25    1.40 
  15  -3  -1   18.17    1.42 
 -15  -3   1   19.05    1.18 
 -15  -3   1   16.50    1.35 
  15  -3  -1   18.03    1.51 
  15  -3  -1   17.66    1.50 
  15  -3  -1   16.89    1.55 
 -15  -3   1   16.47    1.50 
  15  -3  -1   14.77    1.37 
  15  -3  -1   18.78    0.95 
  15   3  -1   17.99    1.31 
  15   3  -1   17.44    1.26 
 -15   3   1   18.28    1.46 
 -15   3   1   14.47    1.18 
  15   3  -1   16.58    1.53 
 -15   3   1   16.44    1.53 
  15   3  -1   12.35    1.02 
 -15   3   1   13.05    1.29 
 -15   3   1   17.83    1.67 
  13  -3  -1   52.13    1.98 
 -13  -3   1   54.97    1.75 
  13  -3  -1   54.30    2.01 
  13  -3  -1   53.16    2.05 
  13  -3  -1   52.32    2.16 
 -13  -3   1   53.58    1.64 
  13  -3  -1   55.50    2.13 
  13  -3  -1   56.74    1.94 
 -13  -3   1   56.38    2.19 
  13   3  -1   52.72    1.91 
  13   3  -1   53.38    1.66 
  13   3  -1   50.04    2.14 
 -13   3   1   54.81    1.95 
 -13   3   1   54.22    1.78 
 -13   3   1   51.54    1.94 
  13   3  -1   55.34    1.62 
 -13   3   1   53.46    2.30 
 -13   3   1   56.65    2.13 
  11  -3  -1    9.80    0.99 
  11  -3  -1   10.81    1.18 
  11  -3  -1   11.74    1.14 
  11  -3  -1    9.67    1.06 
  11  -3  -1   12.37    1.07 
 -11  -3   1   10.09    1.11 
  11   3  -1   11.33    1.18 
  11   3  -1   11.12    1.05 
  11   3  -1   11.52    0.84 
 -11   3   1   10.03    0.98 
 -11   3   1   11.68    1.05 
  11   3  -1   11.39    0.72 
 -11   3   1   11.25    0.93 
 -11   3   1   10.10    1.23 
 -11   3   1   10.20    1.12 
   9  -3  -1   70.13    2.06 
   9  -3  -1   69.08    1.87 
   9  -3  -1   71.65    2.10 
   9  -3  -1   73.97    2.34 
  -9  -3   1   67.99    2.25 
   9  -3  -1   68.39    2.15 
  -9   3   1   70.64    1.89 
  -9   3   1   73.84    2.12 
  -9   3   1   71.90    2.00 
   9   3  -1   69.72    2.09 
   9   3  -1   72.60    2.30 
  -9   3   1   71.00    2.03 
   9   3  -1   73.86    2.28 
  -9   3   1   70.42    2.25 
   7  -3  -1  128.71    2.85 
  -7  -3   1  127.39    3.18 
   7  -3  -1  132.08    3.27 
   7  -3  -1  135.07    3.08 
   7  -3  -1  132.67    2.63 
   7  -3  -1  130.82    2.94 
   7  -3  -1  130.87    2.68 
   7   3  -1  131.10    3.20 
   7   3  -1  131.14    3.20 
  -7   3   1  132.88    3.12 
  -7   3   1  129.00    2.98 
  -7   3   1  131.64    2.66 
  -7   3   1  131.65    2.89 
  -7   3   1  130.94    2.93 
  -7   3   1  129.08    3.11 
   7   3  -1  127.73    3.03 
   5  -3  -1   14.00    0.86 
   5  -3  -1   12.78    0.85 
   5  -3  -1   13.31    0.95 
   5  -3  -1   13.73    0.79 
   5  -3  -1   13.90    1.13 
   5  -3  -1   13.71    0.77 
  -5  -3   1   13.04    0.95 
  -5   3   1   15.26    0.83 
  -5   3   1   13.30    0.91 
  -5   3   1   14.12    0.99 
   5   3  -1   13.88    0.94 
   5   3  -1   12.57    1.13 
   5   3  -1   13.83    1.00 
  -5   3   1   13.33    1.12 
  -3  -3   1  222.51    4.39 
   3  -3  -1  219.46    3.95 
   3  -3  -1  225.01    4.22 
   3  -3  -1  216.82    4.55 
   3  -3  -1  221.66    4.05 
   3  -3  -1  219.62    4.10 
  -3  -3   1  216.79    4.46 
  -3   3   1  219.84    4.15 
  -3   3   1  211.98    4.47 
   3   3  -1  214.38    3.87 
  -3   3   1  214.58    3.99 
  -3   3   1  210.50    3.64 
  -3   3   1  219.42    3.99 
   3   3  -1  215.17    4.47 
   3   3  -1  219.06    4.39 
   1  -3  -1   18.47    0.84 
   1  -3  -1   16.43    0.84 
  -1  -3   1   19.54    1.18 
  -1  -3   1   17.99    0.94 
   1  -3  -1   18.93    1.01 
   1  -3  -1   17.70    1.18 
   1   3  -1   18.34    0.84 
  -1   3   1   19.44    0.83 
  -1   3   1   17.50    1.23 
   1   3  -1   19.16    1.21 
  -1   3   1   19.82    0.93 
   1   3  -1   18.68    0.98 
  -1   3   1   18.66    0.98 
  -1  -3  -1   81.60    2.19 
   1  -3   1   79.97    2.31 
   1  -3   1   77.81    1.85 
   1  -3   1   80.90    1.94 
  -1  -3  -1   79.87    2.30 
  -1   3  -1   77.30    1.79 
   1   3   1   79.11    1.80 
  -1   3  -1   80.81    2.26 
   1   3   1   77.98    2.32 
   1   3   1   75.32    2.08 
  -1   3  -1   80.14    1.95 
   1   3   1   80.35    1.77 
   3  -3   1   64.67    1.55 
   3  -3   1   63.08    1.68 
   3  -3   1   61.69    1.57 
   3  -3   1   60.94    2.02 
  -3  -3  -1   63.01    1.96 
   3  -3   1   61.81    1.52 
   3  -3   1   62.49    1.58 
  -3   3  -1   58.59    1.63 
   3   3   1   62.46    1.92 
   3   3   1   60.21    2.03 
  -3   3  -1   59.42    1.95 
  -3   3  -1   61.68    1.56 
  -3   3  -1   59.20    1.60 
  -3   3  -1   58.12    1.50 
  -3   3  -1   62.67    1.53 
   5  -3   1   10.47    0.82 
   5  -3   1   10.31    0.75 
   5  -3   1   10.41    0.90 
  -5  -3  -1    9.63    0.96 
   5  -3   1    8.61    1.05 
   5  -3   1   10.90    0.84 
   5   3   1    9.44    0.70 
  -5   3  -1   11.03    0.87 
  -5   3  -1    9.08    0.82 
  -5   3  -1   10.86    1.06 
  -5   3  -1    8.83    0.82 
  -5   3  -1    9.45    0.72 
   5   3   1    9.39    0.95 
   5   3   1   10.58    1.13 
   5   3   1    9.53    0.64 
  -5   3  -1   10.54    0.80 
  -7  -3  -1    5.69    0.69 
   7  -3   1    6.38    0.69 
   7  -3   1    7.16    0.91 
  -7  -3  -1    7.63    0.78 
   7  -3   1    6.14    0.79 
   7  -3   1    7.39    0.84 
  -7  -3  -1    5.27    0.82 
   7  -3   1    7.25    0.91 
  -7   3  -1    6.83    0.87 
  -7   3  -1    6.88    0.73 
  -7   3  -1    5.72    0.66 
  -7   3  -1    7.03    0.87 
  -7   3  -1    7.48    0.81 
   7   3   1    6.07    0.71 
   7   3   1    5.43    0.79 
   7   3   1    7.99    0.95 
   9  -3   1    6.88    0.82 
   9  -3   1    5.94    0.91 
  -9  -3  -1    8.70    0.90 
  -9  -3  -1    6.68    0.91 
   9  -3   1    6.52    0.86 
   9  -3   1    7.18    0.88 
   9  -3   1    7.23    0.93 
  -9  -3  -1    7.09    0.81 
  -9  -3  -1    6.94    0.80 
  -9  -3  -1    6.41    0.80 
   9   3   1    5.96    0.87 
  -9   3  -1    5.56    0.79 
   9   3   1    6.26    0.90 
  -9   3  -1    6.18    0.71 
  -9   3  -1    6.08    0.78 
  -9   3  -1    6.26    0.94 
   9   3   1    8.12    0.72 
   9   3   1    6.22    0.77 
   9   3   1    8.60    0.86 
  -9   3  -1    6.94    0.85 
  11  -3   1   11.61    1.19 
  11  -3   1   10.67    1.06 
 -11  -3  -1   10.14    1.21 
 -11  -3  -1   11.26    1.00 
  11  -3   1   10.95    1.18 
  11  -3   1   12.51    1.29 
 -11  -3  -1    7.99    0.96 
  11  -3   1    9.59    1.02 
 -11  -3  -1    9.14    0.96 
 -11  -3  -1    8.76    1.03 
  11  -3   1   10.36    1.15 
  11   3   1    9.30    1.07 
 -11   3  -1   13.14    1.10 
  11   3   1   10.16    0.99 
 -11   3  -1   11.03    1.13 
 -11   3  -1   11.59    1.37 
  11   3   1    7.42    0.82 
  11   3   1   10.76    1.23 
 -11   3  -1   11.48    1.16 
  11   3   1    9.99    1.02 
 -11   3  -1   11.46    0.86 
 -13  -3  -1   17.58    1.31 
  13  -3   1   19.27    1.45 
 -13  -3  -1   15.54    1.55 
 -13  -3  -1   17.96    1.27 
  13  -3   1   18.72    1.35 
 -13  -3  -1   16.81    1.25 
 -13  -3  -1   18.31    1.26 
  13  -3   1   17.59    1.28 
  13  -3   1   16.98    1.40 
  13  -3   1   19.56    1.62 
  13  -3   1   19.98    1.46 
  13   3   1   18.46    1.18 
 -13   3  -1   17.95    1.63 
 -13   3  -1   18.53    1.40 
 -13   3  -1   18.57    1.49 
 -13   3  -1   18.95    1.09 
  13   3   1   15.86    1.53 
  13   3   1   16.35    1.36 
  13   3   1   18.47    1.30 
  13   3   1   19.19    1.29 
 -13   3  -1   16.12    1.30 
 -15  -3  -1    5.89    1.00 
  15  -3   1    5.60    0.69 
  15  -3   1    6.15    1.24 
 -15  -3  -1    5.71    0.98 
  15  -3   1    5.53    1.15 
  15  -3   1    6.07    0.99 
 -15  -3  -1    5.04    1.02 
  15  -3   1    4.82    0.99 
  15  -3   1    5.87    1.08 
 -15  -3  -1    5.50    0.94 
  15  -3   1    6.03    1.11 
 -15  -3  -1    4.61    0.88 
 -15   3  -1    5.62    1.08 
  15   3   1    6.89    1.10 
  15   3   1    5.49    0.86 
 -15   3  -1    6.50    1.00 
 -15   3  -1    5.91    0.85 
  15   3   1    7.02    1.06 
  15   3   1    6.51    0.98 
 -15   3  -1    6.30    1.14 
  15   3   1    4.99    0.96 
 -15   3  -1    6.77    1.35 
 -17  -3  -1    3.52    0.98 
  17  -3   1    5.22    1.07 
  17  -3   1    3.93    0.97 
  17  -3   1    5.70    1.18 
  17  -3   1    6.85    1.26 
  17  -3   1    5.17    0.77 
 -17  -3  -1    4.20    1.02 
  17  -3   1    6.61    1.34 
 -17  -3  -1    2.36    0.97 
  17  -3   1    4.85    1.17 
 -17  -3  -1    3.46    1.06 
 -17  -3  -1    5.02    1.18 
 -17   3  -1    5.80    0.88 
  17   3   1    4.36    1.03 
  17   3   1    5.81    1.04 
 -17   3  -1    6.00    1.21 
 -17   3  -1    5.06    1.08 
 -17   3  -1    6.27    1.21 
  17   3   1    4.83    1.18 
  17   3   1    6.78    1.18 
 -17   3  -1    5.55    1.51 
  17   3   1    5.47    1.05 
 -19  -3  -1   10.34    1.47 
 -19  -3  -1   10.88    1.39 
  19  -3   1   14.88    1.75 
  19  -3   1   14.84    1.77 
  19  -3   1   13.30    1.57 
 -19  -3  -1   12.27    1.47 
  19  -3   1   11.27    1.30 
  19  -3   1   12.05    1.49 
  19  -3   1   12.16    1.62 
 -19  -3  -1   12.22    1.45 
 -19  -3  -1   12.93    1.58 
  19   3   1   13.00    1.62 
  19   3   1   11.15    1.46 
 -19   3  -1   11.13    1.59 
 -19   3  -1   12.82    1.64 
  19   3   1   11.15    1.58 
 -19   3  -1   14.39    1.39 
  19   3   1   13.01    1.65 
  19   3   1   13.83    1.81 
 -19   3  -1   12.98    1.81 
 -19   3  -1   14.17    1.78 
 -21  -3  -1   12.31    1.68 
  21  -3   1   13.63    1.83 
  21  -3   1   12.19    1.79 
 -21  -3  -1   11.86    1.67 
 -21  -3  -1   13.11    1.65 
 -21  -3  -1   13.18    1.73 
  21  -3   1   13.52    2.03 
  21  -3   1    9.13    1.51 
  21  -3   1   12.43    1.31 
  21  -3   1   10.02    1.62 
 -21  -3  -1   12.94    1.70 
 -21   3  -1   10.40    1.31 
  21   3   1   10.88    1.75 
 -21   3  -1   11.92    2.09 
  21   3   1   11.44    1.68 
 -21   3  -1   11.22    1.70 
  21   3   1    9.53    1.43 
  21   3   1   15.96    1.81 
 -21   3  -1    9.95    1.75 
  21   3   1   13.55    1.72 
  23  -3   1   13.50    2.03 
  23  -3   1   14.82    2.40 
 -23  -3  -1   13.17    1.89 
  23  -3   1   13.08    1.49 
 -23  -3  -1   13.56    2.00 
  23  -3   1    9.49    1.74 
  23  -3   1    8.07    1.79 
 -23  -3  -1   10.53    1.80 
 -23  -3  -1   13.65    1.87 
 -23   3  -1   10.16    2.23 
  23   3   1   12.05    1.77 
 -23   3  -1   11.11    1.54 
  23   3   1   12.41    1.91 
  23   3   1   12.75    1.75 
  23   3   1   13.62    1.73 
 -23   3  -1   12.02    1.91 
 -25  -3  -1    7.53    2.14 
  25  -3   1    4.79    1.97 
 -25  -3  -1    3.81    1.96 
  25  -3   1    6.92    1.72 
 -25  -3  -1    5.08    1.94 
 -25  -3  -1    3.87    1.85 
  25  -3   1   -0.30    1.66 
  25   3   1   -0.37    1.95 
 -25   3  -1    4.87    1.61 
 -25   3  -1    5.71    1.99 
 -25   3  -1    5.29    2.24 
  25   3   1    6.79    1.58 
  25   3   1    4.05    1.62 
  25   3   1    2.42    1.78 
 -27  -3  -1   -1.51    2.25 
 -27  -3  -1    1.91    2.18 
  27  -3   1   -1.98    1.86 
  27  -3   1    5.58    2.73 
  27  -3   1    0.45    2.22 
 -27  -3  -1    2.76    2.20 
  27  -3   1    1.30    1.98 
 -27   3  -1    1.54    2.76 
 -27   3  -1    0.84    1.93 
 -27   3  -1    1.32    2.20 
  27   3   1   -1.58    1.53 
  27   3   1   -2.32    1.78 
  29  -3   1    0.33    2.56 
 -29  -3  -1    2.03    2.72 
 -29  -3  -1    2.67    2.73 
  29  -3   1    3.50    2.22 
  29  -3   1    2.08    2.38 
 -29  -3  -1   -2.41    2.62 
 -29   3  -1   -1.75    2.96 
  29   3   1   -0.24    1.90 
 -29   3  -1    5.58    2.68 
  29   3   1    3.50    2.16 
  31  -3   1    3.41    2.99 
 -31  -3  -1    4.14    3.17 
 -31  -3  -1    9.83    3.33 
  31  -3   1    4.73    2.73 
  31  -3   1    2.05    2.83 
  31   3   1   -0.47    2.26 
 -31   3  -1   -2.68    3.04 
  31   3   1   -2.18    2.51 
 -31   3  -1    5.36    3.99 
  32  -4  -1    9.62    3.39 
 -32  -4   1    9.56    3.49 
  32  -4  -1    3.89    3.14 
  32  -4  -1   10.88    3.36 
 -32   4   1    2.78    4.06 
 -32   4   1    8.08    3.61 
  32   4  -1    2.09    2.47 
  32   4  -1    6.56    3.32 
  30  -4  -1    3.45    2.76 
  30  -4  -1    0.38    2.66 
  30  -4  -1    4.62    2.16 
 -30  -4   1    6.06    2.94 
  30  -4  -1    4.14    2.46 
 -30   4   1    0.74    2.77 
 -30   4   1    3.05    3.38 
  30   4  -1    2.20    2.22 
  30   4  -1    5.29    2.34 
 -28  -4   1   -0.05    2.25 
  28  -4  -1    0.17    2.21 
  28  -4  -1   -0.56    3.05 
  28  -4  -1    5.30    2.58 
 -28  -4   1    3.98    2.51 
  28  -4  -1    7.20    2.27 
  28   4  -1    5.14    1.97 
 -28   4   1    3.71    3.27 
  28   4  -1    1.97    1.89 
 -28   4   1    4.69    2.60 
  26  -4  -1    6.66    2.27 
 -26  -4   1    4.75    1.96 
 -26  -4   1    1.55    1.96 
  26  -4  -1    2.97    1.92 
 -26  -4   1    2.27    2.01 
  26  -4  -1    7.08    2.12 
  26  -4  -1    8.89    1.60 
 -26   4   1    2.54    1.72 
 -26   4   1    7.29    2.79 
 -26   4   1    6.12    2.26 
  26   4  -1    2.76    1.59 
  26   4  -1    6.82    1.75 
  26   4  -1    6.53    2.31 
 -24  -4   1    1.67    1.69 
  24  -4  -1    3.73    1.67 
 -24  -4   1    1.46    1.51 
 -24  -4   1    0.21    1.65 
  24  -4  -1    2.11    1.87 
  24  -4  -1   -1.10    1.64 
  24  -4  -1    4.97    2.38 
  24   4  -1    2.17    1.61 
  24   4  -1    2.27    1.70 
 -24   4   1    1.63    2.06 
  24   4  -1    1.33    1.35 
  24   4  -1    0.76    1.79 
  24   4  -1   -2.73    2.01 
 -24   4   1    2.93    1.40 
 -24   4   1    2.56    1.83 
 -22  -4   1    2.09    1.43 
 -22  -4   1    3.18    1.37 
 -22  -4   1    1.72    1.30 
  22  -4  -1    3.37    1.68 
  22  -4  -1    2.35    1.43 
  22  -4  -1    2.85    1.83 
  22  -4  -1    2.98    1.61 
  22  -4  -1    5.81    1.52 
 -22  -4   1    1.64    1.53 
 -22  -4   1    0.20    1.40 
  22   4  -1    3.64    1.44 
 -22   4   1    0.33    2.00 
  22   4  -1    2.67    1.24 
 -22   4   1    2.03    1.29 
  22   4  -1    1.75    1.46 
  22   4  -1    3.35    1.37 
 -22   4   1    4.55    1.60 
  20  -4  -1    3.72    1.55 
  20  -4  -1    5.13    1.27 
 -20  -4   1    5.28    1.53 
 -20  -4   1    5.91    1.22 
 -20  -4   1    4.62    1.32 
  20  -4  -1    4.59    1.39 
  20  -4  -1    2.18    1.51 
 -20  -4   1    4.67    1.30 
 -20  -4   1    4.12    1.18 
  20   4  -1    4.90    1.40 
  20   4  -1    5.21    1.09 
 -20   4   1    3.96    1.69 
 -20   4   1    5.03    1.16 
  20   4  -1    4.53    1.20 
 -20   4   1    5.34    1.55 
  20   4  -1    4.42    1.30 
  18  -4  -1   12.58    1.56 
  18  -4  -1   16.75    1.80 
 -18  -4   1   13.58    1.71 
  18  -4  -1   14.88    1.83 
  18  -4  -1   15.68    1.87 
 -18  -4   1   15.89    2.05 
 -18  -4   1   14.49    1.48 
 -18  -4   1   12.82    1.65 
 -18   4   1   12.30    1.63 
  18   4  -1   10.33    1.18 
  18   4  -1   12.40    1.57 
 -18   4   1   13.09    1.63 
  18   4  -1   14.34    1.71 
 -18   4   1   13.64    1.89 
  18   4  -1   16.66    1.92 
  16  -4  -1   47.47    2.40 
  16  -4  -1   48.25    2.26 
  16  -4  -1   49.59    2.37 
  16  -4  -1   51.78    2.64 
 -16  -4   1   50.62    2.59 
  16  -4  -1   50.54    2.55 
 -16   4   1   53.12    2.09 
  16   4  -1   48.26    1.90 
 -16   4   1   50.80    2.51 
 -16   4   1   49.39    2.33 
 -16   4   1   48.69    2.25 
 -16   4   1   51.29    2.81 
  16   4  -1   48.88    2.63 
  16   4  -1   48.12    2.23 
  16   4  -1   47.00    1.78 
  14  -4  -1   18.73    1.61 
 -14  -4   1   19.32    1.75 
  14  -4  -1   16.36    1.84 
  14  -4  -1   17.72    1.78 
  14  -4  -1   19.23    1.70 
  14  -4  -1   17.34    1.57 
 -14   4   1   18.60    1.74 
 -14   4   1   18.31    1.95 
 -14   4   1   18.79    1.45 
 -14   4   1   16.00    1.40 
  14   4  -1   17.36    1.55 
  14   4  -1   19.31    1.85 
 -14   4   1   20.58    1.57 
  12  -4  -1    0.69    0.88 
  12  -4  -1    1.36    0.91 
 -12  -4   1    1.78    0.87 
  12  -4  -1    1.60    1.07 
  12  -4  -1    1.35    0.84 
  12  -4  -1    2.57    0.81 
 -12   4   1    3.22    0.83 
 -12   4   1    1.61    0.76 
  12   4  -1    2.86    1.17 
  12   4  -1    2.95    0.90 
 -12   4   1    1.69    0.88 
 -12   4   1    0.84    0.97 
 -12   4   1    2.76    0.80 
  12   4  -1    2.48    0.96 
  10  -4  -1   17.36    1.39 
  10  -4  -1   16.51    1.68 
  10  -4  -1   14.92    1.29 
  10  -4  -1   15.72    1.46 
  10   4  -1   18.48    1.55 
 -10   4   1   17.78    1.60 
  10   4  -1   17.78    1.77 
 -10   4   1   15.78    1.26 
 -10   4   1   22.43    1.36 
 -10   4   1   17.27    1.49 
 -10   4   1   16.83    1.21 
  10   4  -1   17.68    1.36 
   8  -4  -1   70.26    2.16 
   8  -4  -1   70.71    2.04 
   8  -4  -1   71.80    2.63 
   8  -4  -1   70.07    1.87 
   8  -4  -1   69.99    2.23 
  -8  -4   1   70.27    2.48 
   8  -4  -1   72.18    2.28 
  -8   4   1   71.37    2.52 
   8   4  -1   69.71    2.34 
   8   4  -1   71.45    2.50 
   8   4  -1   72.80    2.64 
  -8   4   1   71.60    2.13 
  -8   4   1   68.29    1.92 
  -8   4   1   70.09    2.38 
  -8   4   1   71.56    2.26 
  -8   4   1   71.87    2.29 
   6  -4  -1   24.91    1.28 
   6  -4  -1   27.72    1.34 
  -6  -4   1   24.13    1.50 
   6  -4  -1   25.01    1.79 
   6  -4  -1   25.91    1.21 
   6  -4  -1   24.75    1.36 
   6   4  -1   22.42    1.53 
  -6   4   1   25.81    1.36 
  -6   4   1   26.85    1.68 
   6   4  -1   25.94    1.75 
  -6   4   1   23.52    1.50 
   6   4  -1   23.56    1.46 
  -6   4   1   24.20    1.19 
   6   4  -1   24.45    1.26 
   4  -4  -1    5.13    1.03 
   4  -4  -1    4.63    0.69 
   4  -4  -1    4.71    0.72 
   4  -4  -1    5.30    0.73 
   4  -4  -1    4.57    0.71 
  -4  -4   1    3.72    0.73 
   4   4  -1    5.67    0.81 
  -4   4   1    5.30    0.81 
  -4   4   1    6.02    1.05 
  -4   4   1    4.72    0.75 
   4   4  -1    4.90    1.04 
  -4   4   1    5.36    0.64 
  -2  -4   1    4.10    0.79 
   2  -4  -1    4.76    0.64 
  -2  -4   1    3.35    0.83 
   2  -4  -1    3.02    0.58 
   2  -4  -1    2.57    0.89 
   2  -4  -1    3.47    0.69 
  -2   4   1    4.62    0.56 
  -2   4   1    3.82    0.57 
  -2   4   1    4.78    0.71 
   2   4  -1    4.35    0.95 
   2   4  -1    2.80    0.78 
  -2   4   1    2.75    1.02 
   0  -4  -1  139.45    3.40 
   0  -4   1  139.25    3.66 
   0  -4  -1  136.72    3.63 
   0  -4   1  145.42    3.27 
   0   4   1  141.87    2.97 
   0   4   1  140.00    2.85 
   0   4  -1  137.28    3.21 
   0   4  -1  139.31    3.62 
   0   4  -1  141.13    2.71 
   0   4   1  141.45    3.37 
  -2  -4  -1   23.34    1.39 
   2  -4   1   24.14    1.24 
   2  -4   1   24.95    1.68 
   2  -4   1   21.87    1.13 
  -2   4  -1   23.73    1.18 
   2   4   1   24.19    1.39 
  -2   4  -1   23.31    1.19 
  -2   4  -1   23.91    1.18 
   2   4   1   21.59    1.69 
  -2   4  -1   24.65    1.00 
  -2   4  -1   17.71    1.58 
   4  -4   1   62.84    1.93 
   4  -4   1   62.34    1.81 
  -4  -4  -1   60.06    2.21 
   4  -4   1   62.96    1.74 
   4  -4   1   62.38    1.80 
   4  -4   1   65.26    1.80 
   4  -4   1   60.78    2.40 
  -4   4  -1   64.53    1.73 
  -4   4  -1   63.83    1.98 
  -4   4  -1   62.84    1.84 
  -4   4  -1   62.29    2.31 
   4   4   1   57.97    2.18 
  -4   4  -1   61.81    1.73 
  -4   4  -1   64.10    1.85 
   4   4   1   64.39    2.49 
   6  -4   1   51.99    1.87 
   6  -4   1   49.60    1.72 
   6  -4   1   52.29    2.25 
   6  -4   1   51.92    1.75 
   6  -4   1   50.04    1.77 
  -6  -4  -1   51.11    2.15 
  -6   4  -1   51.26    1.67 
   6   4   1   49.59    2.07 
  -6   4  -1   52.22    2.15 
  -6   4  -1   52.16    1.81 
  -6   4  -1   54.21    1.82 
   6   4   1   52.30    2.27 
  -6   4  -1   51.56    1.74 
  -6   4  -1   49.27    1.96 
   8  -4   1   12.63    1.34 
   8  -4   1   11.00    1.15 
  -8  -4  -1    8.28    1.09 
   8  -4   1   11.97    1.14 
   8  -4   1   10.85    1.34 
   8  -4   1   11.37    1.26 
  -8   4  -1   10.62    1.23 
  -8   4  -1   12.00    1.18 
  -8   4  -1   10.53    1.04 
   8   4   1   10.72    1.33 
   8   4   1   11.34    0.99 
  -8   4  -1   11.82    1.36 
   8   4   1    9.90    1.34 
  -8   4  -1   13.64    1.08 
   8   4   1   13.49    1.37 
  10  -4   1    4.09    1.00 
 -10  -4  -1    2.76    0.95 
 -10  -4  -1    3.24    0.79 
  10  -4   1    4.77    0.86 
  10  -4   1    4.07    0.91 
  10  -4   1    4.36    1.07 
  10  -4   1    3.10    0.89 
  10   4   1    3.98    1.14 
  10   4   1    2.95    0.60 
  10   4   1    3.45    1.14 
 -10   4  -1    2.87    0.69 
  10   4   1    3.46    0.92 
 -10   4  -1    3.61    0.88 
  10   4   1    3.53    0.77 
 -10   4  -1    3.75    0.78 
  10   4   1    3.21    0.72 
 -10   4  -1    4.43    0.96 
 -10   4  -1    5.64    1.17 
 -12  -4  -1   16.01    1.72 
 -12  -4  -1   16.85    1.35 
  12  -4   1   18.46    1.75 
  12  -4   1   15.34    1.76 
  12  -4   1   16.41    1.51 
 -12  -4  -1   16.32    1.33 
  12  -4   1   18.04    1.65 
  12  -4   1   19.29    1.77 
 -12   4  -1   18.22    1.27 
 -12   4  -1   18.37    1.89 
  12   4   1   17.57    1.35 
 -12   4  -1   15.26    1.58 
 -12   4  -1   16.48    1.62 
  12   4   1   16.82    1.33 
 -12   4  -1   18.22    1.43 
  12   4   1   13.93    1.08 
  12   4   1   15.96    1.54 
  12   4   1   19.75    1.82 
  14  -4   1   35.96    2.30 
  14  -4   1   36.21    2.29 
  14  -4   1   37.73    2.04 
 -14  -4  -1   38.77    1.77 
  14  -4   1   31.81    2.19 
  14  -4   1   39.28    2.13 
 -14  -4  -1   37.30    2.29 
 -14  -4  -1   35.40    1.87 
 -14  -4  -1   34.88    1.91 
 -14  -4  -1   34.60    1.78 
 -14   4  -1   36.32    1.93 
 -14   4  -1   35.48    2.52 
 -14   4  -1   35.48    2.11 
  14   4   1   35.18    2.07 
  14   4   1   35.29    1.62 
  14   4   1   35.47    1.76 
  14   4   1   35.50    2.31 
  14   4   1   36.59    1.77 
 -14   4  -1   35.93    2.07 
 -14   4  -1   34.70    1.65 
 -16  -4  -1   32.60    1.90 
  16  -4   1   26.06    2.45 
  16  -4   1   27.57    2.32 
  16  -4   1   30.10    2.32 
 -16  -4  -1   31.17    2.00 
 -16  -4  -1   29.60    2.05 
 -16  -4  -1   30.94    1.84 
  16  -4   1   34.58    2.12 
 -16  -4  -1   27.17    2.29 
 -16   4  -1   31.47    2.01 
 -16   4  -1   31.48    1.66 
 -16   4  -1   31.19    2.66 
  16   4   1   28.35    1.71 
 -16   4  -1   31.69    2.19 
  16   4   1   30.96    2.05 
  16   4   1   32.72    1.94 
  16   4   1   30.12    1.96 
 -16   4  -1   29.80    2.11 
 -18  -4  -1   20.28    2.33 
  18  -4   1   22.18    2.53 
  18  -4   1   21.19    2.40 
 -18  -4  -1   22.02    2.17 
  18  -4   1   21.02    2.34 
 -18  -4  -1   21.58    2.13 
 -18  -4  -1   17.79    1.88 
 -18  -4  -1   20.71    1.95 
  18  -4   1   22.81    2.14 
 -18   4  -1   23.25    1.71 
  18   4   1   26.61    2.11 
 -18   4  -1   21.65    2.47 
 -18   4  -1   22.10    2.21 
  18   4   1   21.23    1.83 
  18   4   1   24.35    2.46 
  18   4   1   19.20    2.00 
  18   4   1   21.92    2.00 
 -18   4  -1   16.95    1.86 
 -20  -4  -1   31.91    2.76 
  20  -4   1   27.36    2.32 
  20  -4   1   33.65    2.57 
 -20  -4  -1   29.10    2.34 
  20  -4   1   29.24    3.13 
 -20  -4  -1   31.35    2.46 
  20  -4   1   34.29    2.72 
 -20  -4  -1   30.76    2.52 
  20  -4   1   27.16    2.85 
 -20  -4  -1   29.42    2.59 
 -20   4  -1   31.98    2.09 
  20   4   1   27.93    2.39 
 -20   4  -1   32.70    3.29 
  20   4   1   26.46    2.42 
 -20   4  -1   30.00    2.68 
  20   4   1   33.77    2.38 
  20   4   1   31.49    2.16 
 -20   4  -1   24.06    2.63 
 -22  -4  -1   11.42    1.75 
 -22  -4  -1   11.86    2.06 
 -22  -4  -1   12.87    2.00 
  22  -4   1   16.21    2.56 
  22  -4   1   21.93    2.73 
 -22  -4  -1   10.53    1.83 
  22  -4   1   13.54    1.92 
  22  -4   1   18.56    2.47 
  22   4   1    8.81    1.94 
  22   4   1   15.20    1.92 
  22   4   1   12.47    1.88 
 -22   4  -1   18.58    2.57 
  22   4   1   16.35    2.12 
 -22   4  -1   12.05    2.01 
 -22   4  -1   13.05    1.57 
 -22   4  -1   16.02    2.29 
  22   4   1   12.78    1.82 
  24  -4   1    5.22    2.07 
  24  -4   1   -0.94    2.31 
  24  -4   1    0.08    1.70 
 -24  -4  -1   -1.79    1.82 
 -24  -4  -1    0.03    1.94 
  24  -4   1    3.56    1.87 
 -24  -4  -1   -0.61    2.00 
 -24  -4  -1    3.08    2.09 
  24   4   1    3.50    1.70 
 -24   4  -1   -1.76    1.44 
 -24   4  -1   -1.01    1.91 
 -24   4  -1    4.09    2.46 
  24   4   1    2.76    1.96 
  24   4   1    0.65    1.59 
  26  -4   1    4.38    2.55 
 -26  -4  -1   -1.21    2.35 
  26  -4   1   -0.52    2.09 
  26  -4   1    1.47    1.61 
  26  -4   1    5.19    1.68 
  26  -4   1    1.11    2.12 
 -26  -4  -1   -0.52    2.19 
 -26  -4  -1   -0.53    2.29 
 -26  -4  -1    0.09    2.25 
  26   4   1    1.63    1.87 
 -26   4  -1   -2.68    2.37 
  26   4   1    1.57    1.89 
 -26   4  -1    3.19    2.66 
  26   4   1   -0.40    2.32 
 -26   4  -1   -0.39    1.91 
 -28  -4  -1    1.69    2.79 
  28  -4   1   -0.70    2.74 
 -28  -4  -1   -3.29    2.65 
  28  -4   1    2.89    2.54 
  28  -4   1    2.31    1.94 
  28  -4   1    1.73    2.48 
 -28   4  -1   -5.47    2.84 
  28   4   1   -0.10    2.17 
  28   4   1    2.88    2.21 
 -28   4  -1    5.22    3.33 
 -30  -4  -1   -1.54    3.33 
  30  -4   1   -0.56    3.03 
  30  -4   1    3.66    3.43 
  30  -4   1   -1.97    2.89 
 -30   4  -1    1.98    3.49 
 -30   4  -1    8.96    4.20 
 -29  -5   1    6.22    2.98 
  29  -5  -1    0.89    2.81 
  29  -5  -1    0.79    3.43 
  29   5  -1    3.22    2.76 
 -29   5   1    4.03    4.23 
 -29   5   1   -1.18    3.26 
  29   5  -1    4.95    3.17 
  27  -5  -1    1.36    2.37 
 -27  -5   1    7.97    2.61 
  27  -5  -1    2.70    3.58 
  27  -5  -1    3.03    2.97 
 -27   5   1    2.68    3.34 
  27   5  -1    7.79    2.24 
 -27   5   1    1.08    2.67 
 -25  -5   1    4.39    2.13 
 -25  -5   1    1.09    2.10 
  25  -5  -1   -1.17    2.02 
  25  -5  -1   -0.12    2.71 
  25  -5  -1    5.90    3.15 
  25   5  -1    3.48    2.52 
 -25   5   1    2.48    2.00 
  25   5  -1    2.08    1.67 
 -25   5   1   -0.92    2.79 
  25   5  -1    7.40    2.11 
 -25   5   1    3.82    2.42 
 -23  -5   1    0.67    1.54 
  23  -5  -1    1.84    2.46 
  23  -5  -1    0.13    2.28 
  23  -5  -1    1.68    1.82 
  23   5  -1    1.89    2.03 
  23   5  -1   -0.56    1.78 
 -23   5   1    1.52    2.48 
  23   5  -1   -0.42    1.74 
 -23   5   1    0.71    1.99 
  23   5  -1   -1.03    1.33 
 -23   5   1    2.29    1.70 
  21  -5  -1    3.29    2.19 
  21  -5  -1    2.55    2.27 
  21  -5  -1    1.77    1.58 
  21  -5  -1    2.26    2.13 
 -21  -5   1    0.94    1.82 
 -21   5   1    3.50    1.53 
  21   5  -1    0.21    1.64 
 -21   5   1    3.43    2.15 
  21   5  -1    2.67    1.49 
  21   5  -1    5.55    2.46 
  21   5  -1    1.50    1.18 
 -21   5   1    2.96    1.91 
  21   5  -1    3.49    1.66 
  19  -5  -1    5.50    1.95 
  19  -5  -1    8.28    1.59 
  19  -5  -1    9.11    1.97 
  19  -5  -1    9.00    1.95 
 -19  -5   1    7.60    1.97 
  19   5  -1    9.67    2.40 
  19   5  -1    9.59    1.38 
 -19   5   1    7.42    1.53 
 -19   5   1    8.40    2.23 
  19   5  -1    4.17    1.08 
 -19   5   1    7.00    1.46 
 -19   5   1    7.01    1.84 
  19   5  -1    7.66    1.65 
  19   5  -1    6.30    1.52 
  17  -5  -1   -1.37    1.59 
  17  -5  -1    3.08    1.75 
  17  -5  -1    5.25    1.68 
  17  -5  -1    4.94    1.36 
 -17  -5   1    4.21    1.61 
 -17   5   1    5.45    1.85 
  17   5  -1    2.48    1.40 
  17   5  -1    3.32    1.39 
 -17   5   1    4.13    1.33 
 -17   5   1    1.52    1.42 
 -17   5   1    4.69    1.36 
  17   5  -1    5.06    2.11 
  15  -5  -1   14.42    1.77 
 -15  -5   1   12.59    1.75 
  15  -5  -1   13.83    1.71 
  15  -5  -1   16.65    2.16 
  15  -5  -1   12.39    1.56 
  15  -5  -1   15.56    2.07 
 -15   5   1   15.92    1.79 
 -15   5   1   14.89    1.79 
  15   5  -1   16.61    2.00 
  15   5  -1   16.50    2.20 
 -15   5   1   16.87    2.06 
  15   5  -1   12.91    1.95 
 -15   5   1   14.16    1.76 
 -15   5   1   13.89    1.60 
  13  -5  -1    3.20    1.26 
  13  -5  -1    2.85    1.46 
  13  -5  -1    2.79    1.17 
  13  -5  -1    1.58    1.17 
  13  -5  -1    5.34    1.20 
 -13  -5   1    3.95    1.27 
 -13   5   1    3.66    1.29 
  13   5  -1    3.27    1.60 
 -13   5   1    3.04    1.05 
  13   5  -1    4.14    1.22 
 -13   5   1    3.45    1.08 
  13   5  -1    2.02    1.39 
 -13   5   1    3.79    1.19 
 -13   5   1    2.54    1.44 
  11  -5  -1   34.04    1.98 
 -11  -5   1   33.71    2.25 
  11  -5  -1   33.90    2.11 
  11  -5  -1   31.49    2.15 
  11  -5  -1   34.28    2.44 
  11  -5  -1   33.26    2.06 
 -11   5   1   32.46    1.87 
  11   5  -1   35.08    2.07 
 -11   5   1   32.53    2.17 
  11   5  -1   31.96    2.35 
 -11   5   1   38.21    2.01 
 -11   5   1   33.08    1.81 
  11   5  -1   32.52    2.57 
 -11   5   1   33.54    2.34 
   9  -5  -1    6.28    0.90 
  -9  -5   1    6.30    1.15 
   9  -5  -1    5.74    1.46 
   9  -5  -1    7.94    1.12 
   9  -5  -1    9.34    1.14 
   9  -5  -1    7.25    1.17 
   9   5  -1    5.70    1.19 
   9   5  -1    4.78    1.20 
  -9   5   1    6.83    1.24 
  -9   5   1    6.41    1.27 
  -9   5   1    5.63    1.00 
  -9   5   1    8.63    1.51 
  -9   5   1    8.01    1.26 
   9   5  -1    7.28    1.50 
   7  -5  -1    3.40    0.80 
   7  -5  -1    3.11    0.91 
   7  -5  -1    3.09    0.88 
   7  -5  -1    4.71    1.23 
  -7  -5   1    2.15    1.00 
   7  -5  -1    1.63    0.90 
   7   5  -1    0.87    0.99 
   7   5  -1    3.78    1.10 
  -7   5   1    4.71    1.21 
  -7   5   1    3.45    0.78 
  -7   5   1    4.41    1.03 
   7   5  -1    2.13    1.33 
  -7   5   1    2.37    0.99 
  -7   5   1    2.97    1.18 
   5  -5  -1   28.73    1.59 
   5  -5  -1   24.30    1.51 
   5  -5  -1   26.04    2.15 
   5  -5  -1   24.70    1.53 
   5  -5  -1   26.30    1.48 
  -5  -5   1   27.35    1.82 
  -5   5   1   27.28    1.77 
  -5   5   1   27.94    1.40 
  -5   5   1   28.15    2.20 
   5   5  -1   24.12    1.82 
   5   5  -1   27.97    2.36 
  -5   5   1   25.17    1.63 
  -3  -5   1   42.53    2.35 
   3  -5  -1   46.26    1.71 
  -3  -5   1   41.42    2.03 
   3  -5  -1   42.82    1.91 
   3  -5  -1   43.76    2.44 
  -3   5   1   41.28    2.53 
  -3   5   1   44.50    1.62 
   3   5  -1   41.68    2.52 
   3   5  -1   45.33    2.11 
  -3   5   1   48.09    1.93 
   1  -5  -1  118.69    3.71 
  -1  -5   1  122.28    3.74 
  -1  -5   1  117.10    3.24 
   1  -5  -1  121.42    3.36 
  -1   5   1  118.48    2.70 
   1   5  -1  118.99    2.65 
   1   5  -1  118.30    3.79 
  -1   5   1  120.34    3.84 
  -1   5   1  116.11    2.69 
   1   5  -1  117.28    3.25 
   1  -5   1   69.33    2.92 
  -1  -5  -1   69.27    2.58 
   1  -5   1   69.76    2.29 
  -1  -5  -1   61.64    2.73 
   1   5   1   68.70    2.51 
  -1   5  -1   66.88    2.27 
   1   5   1   67.84    3.00 
  -1   5  -1   68.48    2.90 
  -3  -5  -1   53.86    2.39 
   3  -5   1   50.42    2.66 
   3  -5   1   48.77    1.81 
   3  -5   1   49.99    2.00 
  -3   5  -1   53.53    2.56 
  -3   5  -1   50.30    1.95 
   3   5   1   55.29    2.77 
  -3   5  -1   45.37    1.60 
  -3   5  -1   51.51    1.85 
  -3   5  -1   52.35    1.93 
   3   5   1   53.46    2.33 
   5  -5   1    2.62    0.93 
   5  -5   1    1.85    0.73 
   5  -5   1    1.28    0.67 
  -5  -5  -1   -0.02    0.95 
   5  -5   1    1.94    1.17 
   5  -5   1    2.32    0.74 
  -5   5  -1    1.08    0.65 
  -5   5  -1   -0.51    0.86 
  -5   5  -1    1.42    1.00 
   5   5   1   -0.09    0.96 
   5   5   1    1.23    1.29 
  -5   5  -1    0.49    0.76 
  -5   5  -1   -1.03    1.07 
   7  -5   1    3.15    0.84 
   7  -5   1    3.06    0.97 
  -7  -5  -1    1.60    1.11 
   7  -5   1    1.91    1.07 
   7  -5   1    2.15    1.23 
   7  -5   1    1.54    0.87 
   7   5   1    3.46    1.41 
   7   5   1    1.48    1.10 
  -7   5  -1    2.18    0.99 
  -7   5  -1    2.17    1.25 
  -7   5  -1    3.29    0.95 
  -7   5  -1    2.00    0.91 
  -7   5  -1    1.40    0.77 
  -7   5  -1    2.99    0.97 
   7   5   1    1.82    1.03 
   9  -5   1   14.90    1.58 
  -9  -5  -1   16.79    1.95 
   9  -5   1   20.45    1.77 
   9  -5   1   16.91    2.07 
   9  -5   1   17.67    1.65 
   9  -5   1   15.65    1.91 
   9   5   1   18.44    2.27 
  -9   5  -1   19.81    1.68 
  -9   5  -1   15.30    1.73 
  -9   5  -1   19.44    1.51 
  -9   5  -1   16.35    1.93 
  -9   5  -1   16.22    1.49 
   9   5   1   14.63    1.88 
   9   5   1   20.51    1.96 
  11  -5   1    7.13    1.22 
  11  -5   1    8.41    1.28 
  11  -5   1    7.73    1.33 
  11  -5   1    9.10    1.72 
 -11  -5  -1    3.60    1.31 
  11  -5   1    7.07    1.42 
  11   5   1    7.25    1.29 
 -11   5  -1    8.88    1.48 
  11   5   1    6.42    1.47 
  11   5   1    6.19    1.70 
 -11   5  -1    6.42    1.05 
 -11   5  -1    6.54    1.08 
 -11   5  -1    8.10    1.39 
 -11   5  -1    7.09    1.25 
  13  -5   1    2.74    1.32 
 -13  -5  -1   -1.43    1.24 
  13  -5   1    3.43    1.45 
  13  -5   1    1.38    1.48 
  13  -5   1    0.97    1.35 
  13  -5   1    1.97    1.19 
 -13   5  -1    0.16    0.97 
 -13   5  -1    0.07    1.11 
  13   5   1   -0.37    1.59 
  13   5   1    3.28    1.07 
 -13   5  -1   -1.42    1.14 
 -13   5  -1    1.20    1.44 
  13   5   1    2.14    1.44 
 -13   5  -1    1.78    1.20 
  13   5   1    2.53    1.27 
  13   5   1    1.05    0.78 
  15  -5   1    0.94    1.63 
 -15  -5  -1    2.78    1.49 
  15  -5   1    3.40    1.33 
  15  -5   1    4.62    1.55 
  15  -5   1    2.22    1.48 
  15   5   1    3.92    1.19 
 -15   5  -1    5.30    1.27 
 -15   5  -1    2.79    1.37 
 -15   5  -1    2.82    1.40 
  15   5   1    4.46    1.33 
  15   5   1    4.16    0.93 
 -15   5  -1    4.41    1.72 
 -15   5  -1    3.29    1.12 
  15   5   1    1.38    1.98 
  15   5   1    2.33    1.16 
  17  -5   1    3.13    1.83 
 -17  -5  -1    4.09    1.36 
 -17  -5  -1    0.61    1.73 
  17  -5   1    6.03    1.37 
  17  -5   1    4.30    1.89 
 -17  -5  -1    2.59    1.31 
  17  -5   1    5.29    1.80 
 -17   5  -1    3.96    1.84 
  17   5   1    7.04    1.44 
  17   5   1    3.80    1.52 
 -17   5  -1    5.52    1.59 
  17   5   1    4.34    1.41 
  17   5   1    4.35    2.05 
 -17   5  -1    3.42    1.51 
 -17   5  -1    5.34    1.44 
 -17   5  -1    4.66    1.24 
  17   5   1    2.90    1.01 
 -19  -5  -1   10.06    1.81 
  19  -5   1   13.91    2.43 
 -19  -5  -1   11.18    2.11 
  19  -5   1   12.42    2.26 
  19  -5   1   11.78    1.88 
  19  -5   1   13.90    2.41 
 -19  -5  -1   11.98    1.79 
 -19  -5  -1    9.74    1.72 
 -19  -5  -1   11.15    1.69 
 -19   5  -1   14.04    2.50 
  19   5   1   10.60    1.85 
  19   5   1   15.54    2.00 
 -19   5  -1   10.76    1.53 
 -19   5  -1   12.11    2.08 
  19   5   1   14.22    1.81 
  19   5   1   10.55    1.63 
 -19   5  -1   13.06    2.15 
 -21  -5  -1    1.96    2.07 
  21  -5   1   -0.22    2.63 
 -21  -5  -1    5.81    1.88 
  21  -5   1    7.68    2.62 
  21  -5   1    1.35    2.19 
  21  -5   1    8.73    1.98 
 -21  -5  -1    1.73    1.73 
  21   5   1    7.54    1.87 
  21   5   1    4.88    1.82 
 -21   5  -1    7.79    2.05 
 -21   5  -1    5.04    2.14 
 -21   5  -1    6.19    1.60 
 -21   5  -1    8.45    2.59 
  21   5   1    7.36    1.67 
  21   5   1    5.68    1.86 
 -23  -5  -1    7.15    2.59 
 -23  -5  -1    2.41    2.01 
  23  -5   1    4.72    2.71 
  23  -5   1    4.67    2.91 
  23  -5   1    7.54    2.13 
 -23  -5  -1    8.00    2.15 
 -23  -5  -1   -0.59    2.06 
  23   5   1    7.09    1.94 
 -23   5  -1    4.04    2.71 
  23   5   1    3.32    2.14 
  23   5   1    4.63    2.13 
 -23   5  -1    7.56    1.80 
 -23   5  -1    5.58    2.45 
  25  -5   1    2.83    2.44 
 -25  -5  -1    0.78    2.47 
 -25  -5  -1   -4.20    2.80 
  25  -5   1   -2.30    2.71 
  25   5   1    1.10    2.15 
 -25   5  -1    0.88    3.05 
  25   5   1   -2.48    2.08 
 -25   5  -1   -1.79    2.54 
  25   5   1    1.21    2.56 
 -25   5  -1   -2.14    2.03 
  27  -5   1    4.51    2.99 
  27  -5   1   -0.84    3.18 
 -27  -5  -1   -0.17    2.84 
  27   5   1    1.98    2.44 
 -27   5  -1    2.08    2.99 
 -27   5  -1   -0.69    3.69 
  26  -6  -1    0.53    3.79 
  26  -6  -1   -3.80    2.99 
  26   6  -1    3.64    2.68 
 -26   6   1    2.92    3.30 
  26   6  -1    7.59    3.28 
 -26   6   1   -6.22    3.89 
  24  -6  -1    2.37    3.40 
  24  -6  -1    4.26    3.98 
  24  -6  -1   -0.37    2.58 
  24   6  -1    0.42    2.36 
  24   6  -1    6.23    2.94 
 -24   6   1   -2.72    3.32 
 -24   6   1    2.66    2.83 
  22  -6  -1   -4.15    2.97 
  22  -6  -1   -3.90    3.02 
  22  -6  -1   -0.79    2.13 
 -22   6   1   -3.03    2.89 
  22   6  -1   -0.31    2.22 
  22   6  -1    1.41    2.26 
 -22   6   1   -0.28    2.53 
 -22   6   1    1.47    2.12 
  20  -6  -1    3.63    2.63 
  20  -6  -1   -0.41    2.62 
  20  -6  -1    5.37    2.20 
  20  -6  -1   -0.65    2.66 
 -20  -6   1    0.39    2.44 
 -20   6   1    0.32    1.93 
  20   6  -1    4.41    1.97 
  20   6  -1    2.98    1.94 
 -20   6   1   -2.60    2.19 
 -20   6   1    2.42    2.63 
  18  -6  -1    6.92    2.61 
  18  -6  -1    6.82    2.38 
 -18  -6   1    5.64    2.20 
  18  -6  -1    3.46    1.89 
  18  -6  -1    7.65    2.31 
  18   6  -1    5.82    1.89 
 -18   6   1    3.59    2.15 
  18   6  -1    1.41    1.83 
 -18   6   1    3.94    1.77 
 -18   6   1    3.72    2.43 
  16  -6  -1    9.43    2.06 
  16  -6  -1    6.47    2.09 
  16  -6  -1    8.20    1.94 
  16  -6  -1   10.11    1.90 
  16  -6  -1   10.31    2.10 
 -16  -6   1    6.04    1.92 
 -16   6   1    9.46    2.44 
 -16   6   1    9.56    1.90 
  16   6  -1   10.35    1.70 
  16   6  -1   10.04    1.95 
 -16   6   1    6.53    1.74 
 -16   6   1    9.09    2.07 
  16   6  -1    6.53    2.70 
  14  -6  -1    7.56    1.86 
  14  -6  -1   10.56    1.74 
  14  -6  -1   12.71    2.32 
  14  -6  -1    9.65    1.84 
 -14  -6   1    9.60    1.81 
  14   6  -1    6.29    1.97 
 -14   6   1    7.84    1.60 
 -14   6   1    8.96    1.91 
 -14   6   1    7.91    1.53 
  14   6  -1    5.61    2.47 
 -14   6   1   10.26    2.21 
  14   6  -1   11.39    1.83 
  12  -6  -1    2.88    1.96 
 -12  -6   1    1.89    1.48 
  12  -6  -1    1.32    1.41 
  12  -6  -1    2.90    1.36 
  12  -6  -1    2.15    1.59 
  12  -6  -1    1.70    1.48 
 -12   6   1   -0.24    1.25 
  12   6  -1    2.75    1.84 
  12   6  -1    0.12    1.39 
 -12   6   1    1.39    1.62 
 -12   6   1    1.26    1.42 
  12   6  -1    2.10    2.33 
 -12   6   1    0.58    1.19 
 -12   6   1    2.11    1.50 
  10  -6  -1   20.75    2.12 
  10  -6  -1   22.12    2.15 
  10  -6  -1   23.59    2.26 
  10  -6  -1   27.42    2.80 
 -10  -6   1   23.51    2.41 
  10   6  -1   18.76    2.41 
 -10   6   1   24.05    2.42 
 -10   6   1   24.87    2.81 
 -10   6   1   20.60    2.38 
  10   6  -1   24.35    2.61 
 -10   6   1   17.87    1.89 
  10   6  -1   21.91    2.37 
   8  -6  -1   26.72    1.78 
   8  -6  -1   27.63    2.17 
   8  -6  -1   24.40    2.04 
   8  -6  -1   24.46    2.06 
  -8  -6   1   29.40    2.42 
   8  -6  -1   24.00    2.91 
   8   6  -1   30.40    2.46 
   8   6  -1   28.78    2.57 
   8   6  -1   24.99    3.24 
  -8   6   1   30.91    2.38 
  -8   6   1   27.74    2.46 
  -8   6   1   22.81    1.86 
  -8   6   1   31.74    2.61 
   6  -6  -1   26.72    2.74 
   6  -6  -1   22.09    1.87 
   6  -6  -1   18.10    1.79 
   6  -6  -1   21.40    1.83 
  -6  -6   1   24.17    2.18 
  -6   6   1   23.81    1.71 
   6   6  -1   20.63    2.34 
   6   6  -1   25.92    1.93 
  -6   6   1   20.48    2.26 
   6   6  -1   23.55    3.03 
   6   6  -1   18.15    2.29 
  -4  -6   1   10.06    1.46 
   4  -6  -1   14.07    1.93 
   4  -6  -1   10.20    1.39 
   4   6  -1   11.20    1.31 
   4   6  -1    9.79    1.53 
  -4   6   1   15.49    1.95 
  -4   6   1   10.12    1.13 
   4   6  -1   12.58    2.05 
  -2  -6   1   48.93    2.40 
   2  -6  -1   49.94    3.11 
  -2  -6   1   49.79    3.06 
   2  -6  -1   51.39    2.53 
   2   6  -1   48.95    2.65 
   2   6  -1   54.22    3.37 
   2   6  -1   49.54    1.94 
  -2   6   1   51.66    1.80 
   0  -6   1    2.97    1.14 
   0  -6  -1    0.60    1.37 
   0  -6   1    3.52    1.62 
   0  -6  -1    3.31    1.20 
   0   6   1    2.75    1.05 
   0   6   1    2.47    2.00 
   0   6  -1    2.38    0.83 
   0   6  -1    1.77    1.16 
   0   6  -1    5.63    1.85 
   2  -6   1    5.58    1.76 
  -2  -6  -1    3.73    1.30 
   2  -6   1    4.34    1.09 
   2   6   1    2.40    1.32 
  -2   6  -1    4.64    1.83 
   2   6   1    3.65    1.84 
   4  -6   1   76.12    3.59 
  -4  -6  -1   70.48    3.11 
   4  -6   1   65.60    2.42 
   4   6   1   64.12    3.69 
  -4   6  -1   66.08    2.17 
  -4   6  -1   71.94    3.41 
  -4   6  -1   62.80    2.61 
   4   6   1   65.45    3.08 
   6  -6   1    2.95    1.80 
  -6  -6  -1    2.36    1.44 
   6  -6   1    3.28    1.04 
   6  -6   1    2.66    1.39 
   6   6   1    3.66    1.62 
  -6   6  -1    2.83    1.32 
  -6   6  -1    4.52    1.01 
   6   6   1    4.43    1.50 
  -6   6  -1    3.00    1.37 
  -6   6  -1    4.42    1.80 
   6   6   1    4.76    2.18 
   8  -6   1   15.36    1.93 
   8  -6   1   10.54    1.35 
  -8  -6  -1    8.36    1.86 
   8  -6   1   16.03    1.85 
   8  -6   1   11.85    1.98 
   8  -6   1   10.27    1.68 
  -8   6  -1   12.09    1.58 
  -8   6  -1   11.60    1.49 
   8   6   1   10.08    1.77 
  -8   6  -1   11.82    1.79 
  -8   6  -1    9.05    1.28 
   8   6   1    8.31    2.14 
   8   6   1    9.57    1.85 
  -8   6  -1   11.42    1.55 
  10  -6   1    8.93    2.09 
  10  -6   1   13.79    1.83 
  10  -6   1   12.67    1.57 
 -10  -6  -1    9.69    1.86 
  10  -6   1   12.73    1.67 
  10  -6   1   11.72    1.62 
  10   6   1   13.30    2.02 
 -10   6  -1   13.94    1.68 
  10   6   1   12.75    1.90 
 -10   6  -1   13.61    1.56 
 -10   6  -1   11.97    1.48 
  10   6   1   14.99    2.38 
 -10   6  -1   15.00    1.95 
 -10   6  -1   12.96    1.83 
  12  -6   1    5.63    1.98 
 -12  -6  -1    1.42    1.62 
  12  -6   1    3.52    1.61 
  12  -6   1    5.20    1.86 
  12  -6   1    2.95    1.48 
  12   6   1    1.76    1.88 
  12   6   1    3.74    1.74 
 -12   6  -1    3.13    1.64 
 -12   6  -1    1.97    1.83 
 -12   6  -1    1.98    1.26 
  12   6   1    4.15    2.32 
 -12   6  -1    2.92    1.60 
 -12   6  -1    5.30    1.42 
 -14  -6  -1    5.20    2.07 
  14  -6   1    8.83    2.29 
  14  -6   1    5.50    1.66 
  14  -6   1    7.77    2.19 
  14  -6   1    6.62    1.86 
  14   6   1    5.43    2.69 
 -14   6  -1    7.61    1.86 
  14   6   1    8.75    1.87 
 -14   6  -1    7.16    1.54 
 -14   6  -1    6.53    1.60 
 -14   6  -1    9.69    2.36 
 -14   6  -1    8.98    1.79 
  16  -6   1   20.79    2.89 
  16  -6   1   17.57    2.79 
  16  -6   1   19.92    2.20 
  16  -6   1   27.37    3.37 
 -16  -6  -1   20.33    2.54 
  16   6   1   18.61    2.41 
 -16   6  -1   20.42    2.39 
 -16   6  -1   20.24    2.85 
 -16   6  -1   19.31    2.39 
 -16   6  -1   25.40    2.96 
  18  -6   1    4.47    1.98 
  18  -6   1   10.29    2.76 
  18  -6   1    7.43    2.45 
 -18  -6  -1    5.33    2.13 
 -18   6  -1   10.43    2.81 
 -18   6  -1    6.68    2.18 
  18   6   1    8.74    1.83 
 -18   6  -1    8.93    1.84 
 -18   6  -1    8.04    2.28 
  18   6   1    7.27    2.12 
  20  -6   1    3.76    2.75 
 -20  -6  -1    7.21    2.72 
  20  -6   1   11.46    3.21 
  20  -6   1    2.61    2.12 
  20  -6   1    4.52    2.93 
 -20   6  -1    2.99    2.46 
 -20   6  -1    2.95    2.55 
  20   6   1    2.84    2.15 
  20   6   1    2.74    2.01 
 -20   6  -1    1.88    1.84 
  20   6   1    1.60    1.61 
 -20   6  -1    2.75    2.97 
  20   6   1    4.20    2.28 
 -22  -6  -1   -1.04    2.57 
  22  -6   1    2.58    2.53 
  22  -6   1   -0.46    3.02 
 -22   6  -1    3.68    2.78 
  22   6   1    4.40    2.43 
 -22   6  -1    4.21    2.14 
  22   6   1   -0.23    2.39 
 -22   6  -1    5.18    3.44 
 -24  -6  -1   -2.72    3.24 
  24  -6   1   10.18    3.46 
  24  -6   1    7.14    2.88 
  24   6   1    0.77    2.66 
 -24   6  -1   -0.64    3.06 
 -24   6  -1    0.32    3.82 
  23  -7  -1   -2.50    3.37 
  23  -7  -1    6.03    4.38 
  23   7  -1    5.73    3.18 
  21  -7  -1    7.43    3.80 
  21  -7  -1    7.22    3.10 
 -21   7   1    4.40    4.08 
 -21   7   1    4.36    3.67 
  21   7  -1    1.93    2.90 
  21   7  -1    3.45    3.17 
  19  -7  -1    8.59    2.76 
  19  -7  -1    5.79    3.48 
  19  -7  -1    1.38    3.39 
  19   7  -1    5.13    2.62 
  19   7  -1    4.42    2.88 
 -19   7   1    6.81    3.03 
 -19   7   1    8.71    3.42 
  17  -7  -1   -0.90    3.06 
  17  -7  -1    3.85    2.31 
 -17  -7   1   -1.60    2.89 
  17  -7  -1   -0.52    2.95 
  17   7  -1    0.86    2.30 
  17   7  -1    3.27    2.34 
 -17   7   1    4.52    3.01 
 -17   7   1   -2.09    2.57 
 -17   7   1   -2.25    2.23 
  15  -7  -1   11.02    2.95 
  15  -7  -1    3.30    2.66 
 -15  -7   1    2.21    2.69 
  15  -7  -1    3.15    2.49 
  15  -7  -1    4.24    2.07 
 -15   7   1    7.82    2.94 
 -15   7   1    0.89    2.10 
  15   7  -1    7.57    2.22 
 -15   7   1    6.44    2.50 
  15   7  -1    1.45    2.18 
  13  -7  -1   -0.10    1.90 
 -13  -7   1    2.05    2.10 
  13  -7  -1    0.42    2.07 
  13  -7  -1    3.63    2.67 
 -13   7   1   -1.60    2.20 
  13   7  -1    4.90    2.14 
  13   7  -1    2.26    2.06 
 -13   7   1    2.02    2.52 
 -13   7   1   -2.06    2.00 
  11  -7  -1    1.91    1.88 
 -11  -7   1   -0.76    2.10 
  11  -7  -1   -0.41    1.74 
  11  -7  -1   -1.84    1.67 
  11  -7  -1   -0.48    2.57 
  11   7  -1    0.83    1.89 
 -11   7   1    0.06    1.50 
  11   7  -1    1.86    1.97 
 -11   7   1    2.96    1.98 
 -11   7   1    1.10    2.01 
 -11   7   1    3.91    2.41 
   9  -7  -1   -0.22    1.25 
   9  -7  -1    2.93    1.66 
   9  -7  -1   -3.18    1.52 
   9  -7  -1    3.79    2.54 
  -9  -7   1    1.55    2.05 
   9   7  -1   -1.04    1.85 
  -9   7   1    2.73    2.10 
  -9   7   1    3.17    2.12 
   9   7  -1   -5.06    1.95 
  -9   7   1    0.98    1.41 
   9   7  -1    1.46    1.69 
   7  -7  -1    4.20    2.37 
  -7  -7   1    8.15    1.88 
   7  -7  -1    7.24    1.55 
   7   7  -1   10.26    1.66 
   7   7  -1    8.01    2.16 
   7   7  -1   11.33    2.07 
  -7   7   1   10.77    2.20 
  -7   7   1    4.55    1.38 
  -7   7   1    8.32    2.13 
   5  -7  -1    4.79    1.56 
   5  -7  -1    6.81    2.30 
  -5  -7   1    6.83    1.71 
   5   7  -1    6.35    2.09 
   5   7  -1    7.21    2.13 
  -5   7   1    5.67    1.67 
   5   7  -1    7.82    2.92 
   5   7  -1    6.46    1.49 
  -5   7   1    3.74    1.20 
   3  -7  -1    3.49    2.20 
   3  -7  -1    2.76    1.50 
  -3  -7   1    5.93    1.81 
   3   7  -1    6.02    1.36 
   3   7  -1    2.25    1.88 
   3   7  -1    6.10    2.51 
   1  -7  -1   70.68    3.37 
   1  -7  -1   72.48    4.20 
  -1  -7   1   68.48    3.24 
  -1  -7   1   77.41    4.30 
  -1   7   1   68.61    2.42 
   1   7  -1   76.45    3.52 
   1   7  -1   71.45    4.58 
   1   7  -1   72.21    2.43 
   1   7  -1   79.13    2.69 
  -1  -7  -1    8.01    1.85 
   1  -7   1    6.61    1.60 
   1  -7   1   10.46    2.37 
  -1   7  -1    8.82    2.61 
   1   7   1    3.50    2.63 
   1   7   1    9.91    1.60 
   3  -7   1   17.14    2.63 
  -3  -7  -1   11.02    2.07 
  -3   7  -1   13.49    2.77 
   3   7   1   12.97    1.90 
  -5  -7  -1    8.47    2.06 
   5  -7   1   14.55    2.62 
  -5   7  -1   11.19    2.12 
   5   7   1   10.18    2.15 
   7  -7   1    3.23    2.30 
  -7  -7  -1    1.10    1.79 
  -7   7  -1    2.99    1.30 
   7   7   1    0.40    2.04 
  -7   7  -1   -1.43    1.87 
  -7   7  -1    3.54    1.90 
   7   7   1    3.27    2.16 
   9  -7   1    8.69    2.30 
   9  -7   1   12.75    1.78 
   9  -7   1   12.58    2.96 
  -9  -7  -1   10.26    2.49 
  -9   7  -1    9.36    1.88 
  -9   7  -1   12.44    1.73 
   9   7   1   14.82    2.38 
  -9   7  -1   21.29    2.76 
  -9   7  -1   13.07    2.46 
  11  -7   1    1.31    1.89 
  11  -7   1    4.59    1.85 
  11  -7   1    3.10    1.93 
  11  -7   1    8.82    2.73 
  11  -7   1    1.72    2.45 
 -11  -7  -1    3.20    2.32 
 -11   7  -1    2.50    1.78 
 -11   7  -1    5.82    2.11 
  11   7   1    4.04    2.07 
 -11   7  -1    3.52    1.81 
 -11   7  -1   10.33    2.48 
 -11   7  -1    2.89    1.78 
 -13  -7  -1    3.30    2.24 
  13  -7   1    8.08    2.82 
  13  -7   1    9.77    2.11 
  13  -7   1    0.28    2.17 
  13  -7   1    4.92    2.92 
  13   7   1    5.88    2.31 
 -13   7  -1    5.78    2.78 
 -13   7  -1    7.37    2.24 
 -13   7  -1    2.48    1.96 
 -13   7  -1    9.89    2.37 
  15  -7   1   -1.78    2.22 
  15  -7   1   -0.68    3.07 
 -15  -7  -1    3.07    2.61 
  15  -7   1   -0.56    2.97 
 -15   7  -1    1.02    2.50 
  15   7   1    5.24    2.52 
 -15   7  -1   -1.15    2.30 
 -15   7  -1   -2.73    2.01 
 -15   7  -1    1.70    3.04 
  17  -7   1    8.12    3.49 
  17  -7   1    0.48    2.55 
 -17  -7  -1    2.88    2.68 
 -17   7  -1   -2.04    2.68 
 -17   7  -1    0.42    2.95 
 -17   7  -1    4.66    3.33 
 -17   7  -1   -1.60    2.19 
  17   7   1    3.02    2.58 
  19  -7   1    7.39    2.95 
 -19  -7  -1    7.99    3.15 
  19  -7   1   13.35    3.72 
  19  -7   1    4.38    4.29 
 -19   7  -1    5.57    3.32 
 -19   7  -1    5.96    3.88 
  19   7   1    2.12    2.79 
  21  -7   1    7.93    3.22 
 -21  -7  -1   10.77    3.63 
  21  -7   1   12.02    4.02 
  21   7   1    9.50    3.16 
 -21   7  -1    4.87    3.62 
  16  -8  -1   -0.06    2.94 
  16  -8  -1   -3.65    4.24 
  16   8  -1   -0.88    2.98 
 -16   8   1   -1.66    3.40 
  16   8  -1    0.14    2.94 
  14  -8  -1   -2.73    3.74 
  14  -8  -1   -3.96    2.59 
  14   8  -1    4.10    2.81 
  14   8  -1   -2.16    2.91 
 -14   8   1    3.56    3.07 
 -12  -8   1   10.02    3.06 
  12  -8  -1   12.12    3.86 
  12  -8  -1    5.35    2.47 
  12   8  -1    6.52    2.63 
  12   8  -1    9.70    2.97 
  10  -8  -1    4.28    3.61 
 -10  -8   1    6.20    2.82 
  10   8  -1    5.84    2.67 
  10   8  -1    1.54    2.30 
  -8  -8   1    0.52    2.55 
   8  -8  -1    5.01    3.19 
   8  -8  -1    0.44    1.96 
   8   8  -1   -2.09    2.56 
   8   8  -1    1.30    2.15 
  -8   8   1   -1.54    3.08 
   6  -8  -1    8.58    3.48 
   6  -8  -1    4.99    2.02 
  -6  -8   1    1.90    2.48 
  -6   8   1    9.25    3.08 
   6   8  -1    6.01    2.00 
   6   8  -1    9.59    2.71 
   4  -8  -1    4.21    3.15 
   4  -8  -1    0.52    2.11 
  -4  -8   1   -0.22    2.43 
   4   8  -1    2.68    2.33 
   4   8  -1    0.69    1.73 
   4   8  -1    1.24    2.70 
   2  -8  -1    7.75    2.24 
   0  -8  -1   -0.90    2.23 
  -2  -8  -1    0.70    2.31 
   2  -8   1    4.72    3.32 
   2   8   1   -0.63    1.64 
   2   8   1    4.86    2.15 
  -4  -8  -1    8.16    2.48 
   4  -8   1   10.38    3.38 
   4   8   1    9.29    3.01 
   4   8   1    8.65    2.08 
   4   8   1   10.83    2.62 
  -4   8  -1    9.54    2.99 
  -6  -8  -1    5.52    2.80 
   6  -8   1    9.08    3.26 
  -6   8  -1    4.90    3.00 
   6   8   1    6.53    2.84 
   6   8   1   10.22    2.94 
   6   8   1    6.22    2.29 
  -8  -8  -1    7.40    2.80 
   8  -8   1    2.11    3.61 
   8   8   1    9.45    2.89 
  -8   8  -1   12.41    2.82 
   8   8   1    6.93    3.21 
  10  -8   1   10.84    3.83 
 -10  -8  -1   10.98    2.97 
 -10   8  -1    0.96    2.63 
  10   8   1    4.67    2.70 
  12  -8   1   -1.25    3.77 
 -12  -8  -1    3.78    3.35 
  12  -8   1   -6.45    2.45 
  12   8   1    0.99    3.02 
 -14  -8  -1    4.41    3.47 
  14  -8   1   -2.55    3.98 
  14  -8   1    2.87    2.83 
  14   8   1    6.61    3.20 
 -14   8  -1   -2.28    3.34 
   3  -9  -1   -1.14    3.18 
   3   9  -1    6.56    3.63 
   1  -9  -1   16.89    3.54 
   1   9  -1    6.94    3.83 
  -1  -9  -1    9.12    3.46 
 -36   0   2   -1.90    3.75 
  36   0  -2   -0.20    3.16 
  36   0  -2    8.73    2.97 
  36   0  -2    5.55    2.94 
 -36   0   2    9.76    3.55 
  34   0  -2    2.44    2.52 
  34   0  -2   -0.97    2.13 
 -34   0   2    3.36    2.78 
  34   0  -2   -1.19    2.43 
 -34   0   2    3.93    2.90 
 -34   0   2   -5.77    2.77 
  34   0  -2   -2.31    2.33 
 -32   0   2   13.26    2.68 
 -32   0   2   13.12    2.97 
  32   0  -2   11.02    2.41 
  32   0  -2   11.67    3.17 
  32   0  -2   14.15    2.18 
  32   0  -2   15.32    2.61 
  32   0  -2   11.34    2.24 
  30   0  -2    4.25    2.30 
  30   0  -2    1.40    1.56 
  30   0  -2   -1.37    1.71 
  30   0  -2    2.71    1.84 
  30   0  -2   -0.64    1.61 
 -30   0   2   -2.43    1.81 
 -30   0   2    1.30    1.94 
 -30   0   2    1.60    1.94 
  28   0  -2    2.38    1.61 
 -28   0   2   -0.66    1.43 
  28   0  -2   -0.24    1.21 
  28   0  -2    0.63    1.36 
  28   0  -2    0.57    1.69 
 -28   0   2    2.55    1.69 
 -28   0   2    1.42    1.38 
  28   0  -2    0.97    1.42 
 -28   0   2    3.09    1.78 
 -26   0   2    1.65    1.28 
  26   0  -2    3.59    1.26 
 -26   0   2    4.10    1.25 
  26   0  -2    5.83    1.25 
 -26   0   2    2.66    1.45 
  26   0  -2    3.44    1.38 
 -26   0   2    3.27    1.48 
  26   0  -2    3.26    1.47 
  26   0  -2    3.61    1.43 
  24   0  -2    6.09    1.03 
 -24   0   2    6.04    1.52 
  24   0  -2    8.30    1.48 
  24   0  -2    6.44    1.13 
  24   0  -2    6.39    1.28 
 -24   0   2    6.61    1.44 
 -24   0   2    6.02    1.16 
  24   0  -2    6.80    1.23 
 -24   0   2    6.82    1.19 
  24   0  -2    5.72    1.40 
  24   0  -2    5.39    1.25 
  22   0  -2    1.72    1.04 
  22   0  -2    1.62    1.01 
  22   0  -2    2.82    0.76 
 -22   0   2    0.26    1.03 
  22   0  -2    2.71    0.90 
 -22   0   2    2.33    0.91 
  22   0  -2    2.80    0.92 
  22   0  -2    3.06    0.99 
 -22   0   2    1.71    1.02 
 -22   0   2    2.32    0.93 
  22   0  -2    1.81    0.91 
  20   0  -2    0.60    0.82 
  20   0  -2   -0.18    0.83 
 -20   0   2    0.22    0.62 
 -20   0   2   -0.05    0.69 
 -20   0   2    0.34    0.73 
 -20   0   2   -0.49    0.79 
  20   0  -2    0.15    0.80 
  20   0  -2   -0.61    0.56 
  20   0  -2   -0.02    0.68 
  20   0  -2    0.55    0.76 
  20   0  -2    0.29    0.78 
  18   0  -2   -0.54    0.69 
  18   0  -2   -0.07    0.56 
 -18   0   2    0.22    0.57 
  18   0  -2    0.23    0.46 
 -18   0   2   -0.49    0.64 
 -18   0   2   -0.28    0.69 
 -18   0   2    0.14    0.62 
  18   0  -2    0.17    0.58 
  18   0  -2    0.19    0.56 
  18   0  -2    0.43    0.70 
 -16   0   2   21.54    1.10 
  16   0  -2   23.51    1.21 
  16   0  -2   22.29    1.35 
  16   0  -2   20.21    1.07 
 -16   0   2   23.18    1.35 
 -16   0   2   21.05    1.39 
 -16   0   2   21.28    1.22 
  16   0  -2   20.33    1.28 
  16   0  -2   23.06    1.29 
  16   0  -2   21.92    1.23 
  14   0  -2   43.79    1.58 
  14   0  -2   43.53    1.46 
  14   0  -2   40.84    1.62 
 -14   0   2   41.00    1.69 
 -14   0   2   45.24    1.63 
  14   0  -2   40.72    1.36 
  14   0  -2   43.43    1.53 
  14   0  -2   41.20    1.52 
 -14   0   2   41.31    1.49 
 -14   0   2   42.71    1.39 
  12   0  -2   39.63    1.39 
 -12   0   2   39.98    1.34 
  12   0  -2   38.88    1.22 
  12   0  -2   41.43    1.29 
  12   0  -2   39.75    1.45 
 -12   0   2   41.64    1.25 
  12   0  -2   38.57    1.33 
 -12   0   2   39.21    1.39 
 -12   0   2   38.75    1.49 
  12   0  -2   41.03    1.40 
  10   0  -2    3.10    0.44 
  10   0  -2    4.61    0.45 
  10   0  -2    3.40    0.44 
  10   0  -2    4.44    0.57 
 -10   0   2    4.31    0.51 
 -10   0   2    3.80    0.42 
 -10   0   2    3.03    0.51 
 -10   0   2    4.08    0.54 
  10   0  -2    3.71    0.55 
   8   0  -2    8.70    0.60 
  -8   0   2    8.79    0.64 
  -8   0   2    8.88    0.47 
   8   0  -2    7.80    0.53 
   8   0  -2    8.07    0.46 
  -8   0   2    8.81    0.52 
   8   0  -2    8.23    0.57 
   8   0  -2    7.95    0.54 
  -8   0   2    8.29    0.58 
   6   0  -2   13.41    0.57 
   6   0  -2   13.83    0.57 
   6   0  -2   14.22    0.52 
  -6   0   2   13.67    0.57 
  -6   0   2   13.03    0.58 
  -6   0   2   13.86    0.57 
   6   0  -2   13.53    0.62 
  -6   0   2   13.84    0.50 
  -6   0   2   13.94    0.65 
   6   0  -2   13.33    0.57 
   4   0  -2    7.51    0.39 
   4   0  -2    7.37    0.37 
  -4   0   2    6.46    0.30 
  -4   0   2    6.66    0.38 
  -4   0   2    7.84    0.38 
   4   0  -2    6.89    0.31 
  -4   0   2    6.03    0.34 
   4   0  -2    7.17    0.36 
  -4   0   2    6.98    0.41 
   0   0  -2   17.83    0.53 
  -2   0  -2   13.88    0.53 
  -2   0  -2   13.59    0.55 
   2   0   2   14.52    0.48 
  -2   0  -2   13.73    0.56 
   2   0   2   13.21    0.53 
   2   0   2   15.48    0.57 
  -2   0  -2   13.85    0.54 
   2   0   2   14.15    0.58 
   2   0   2   13.26    0.54 
  -2   0  -2   14.89    0.59 
  -4   0  -2   20.99    0.83 
   4   0   2   20.94    0.76 
   4   0   2   21.09    0.81 
   4   0   2   20.61    0.79 
  -4   0  -2   20.95    0.79 
  -4   0  -2   23.34    0.73 
   4   0   2   23.23    0.69 
   4   0   2   21.13    0.77 
  -4   0  -2   21.31    0.69 
  -4   0  -2   23.16    0.80 
  -4   0  -2   21.14    0.77 
   6   0   2  132.45    2.72 
  -6   0  -2  131.90    2.63 
   6   0   2  131.72    2.78 
  -6   0  -2  137.46    2.85 
  -6   0  -2  135.73    2.65 
  -6   0  -2  134.25    2.69 
  -6   0  -2  134.49    2.69 
   6   0   2  135.19    2.62 
   6   0   2  135.21    2.67 
   6   0   2  136.42    2.72 
   6   0   2  131.16    2.58 
  -8   0  -2   16.91    0.80 
  -8   0  -2   15.95    0.95 
   8   0   2   17.76    0.95 
   8   0   2   17.46    0.78 
  -8   0  -2   17.27    0.89 
  -8   0  -2   16.51    0.79 
  -8   0  -2   17.70    0.91 
   8   0   2   17.61    0.89 
   8   0   2   16.99    0.93 
   8   0   2   16.43    0.88 
   8   0   2   17.48    0.74 
  10   0   2   37.11    1.46 
  10   0   2   37.85    1.39 
  10   0   2   38.79    1.43 
 -10   0  -2   37.34    1.43 
 -10   0  -2   35.28    1.23 
  10   0   2   37.30    1.37 
 -10   0  -2   37.30    1.41 
  10   0   2   36.24    1.18 
  10   0   2   37.14    1.24 
 -10   0  -2   36.00    1.26 
  12   0   2    2.36    0.63 
  12   0   2    1.42    0.54 
  12   0   2    1.24    0.41 
 -12   0  -2    1.87    0.50 
 -12   0  -2    2.65    0.53 
  12   0   2    2.58    0.62 
 -12   0  -2    2.49    0.66 
 -12   0  -2    1.86    0.59 
 -12   0  -2    2.32    0.57 
  12   0   2    2.13    0.63 
  12   0   2    1.84    0.49 
  14   0   2    4.16    0.69 
  14   0   2    5.23    0.90 
  14   0   2    3.16    0.58 
  14   0   2    3.00    0.75 
 -14   0  -2    3.90    0.76 
  14   0   2    4.91    0.89 
 -14   0  -2    4.44    0.87 
 -14   0  -2    3.62    0.66 
  14   0   2    3.67    0.67 
 -14   0  -2    5.43    0.82 
 -14   0  -2    4.37    0.85 
  16   0   2   15.75    1.11 
  16   0   2   17.54    1.41 
 -16   0  -2   16.95    1.63 
  16   0   2   19.60    1.55 
 -16   0  -2   16.45    1.31 
 -16   0  -2   16.10    1.17 
  16   0   2   17.31    1.33 
  16   0   2   21.09    1.63 
 -16   0  -2   14.75    1.42 
  16   0   2   14.93    1.23 
 -16   0  -2   17.26    1.46 
  18   0   2   13.79    1.39 
 -18   0  -2   12.97    1.43 
  18   0   2   15.08    1.58 
  18   0   2   14.22    1.69 
 -18   0  -2   14.71    1.76 
  18   0   2   10.79    1.28 
 -18   0  -2   11.18    1.23 
  18   0   2   10.97    1.13 
 -18   0  -2   10.86    1.37 
  18   0   2   12.87    1.47 
  20   0   2   10.74    1.25 
  20   0   2   12.60    1.52 
 -20   0  -2   11.49    1.34 
 -20   0  -2   11.83    1.67 
  20   0   2   12.04    1.27 
 -20   0  -2   11.35    1.20 
  20   0   2   10.91    1.55 
 -20   0  -2   11.83    1.80 
  20   0   2    9.95    1.44 
  20   0   2    9.05    1.50 
 -22   0  -2   67.29    3.29 
 -22   0  -2   62.79    2.78 
  22   0   2   67.51    2.94 
  22   0   2   67.85    3.00 
  22   0   2   64.60    2.42 
 -22   0  -2   60.65    2.98 
  22   0   2   70.12    3.21 
  22   0   2   62.12    3.18 
  22   0   2   66.69    2.54 
  24   0   2    0.21    1.11 
 -24   0  -2    1.37    1.64 
  24   0   2    2.05    1.48 
 -24   0  -2    1.02    1.39 
  24   0   2    0.76    1.13 
  24   0   2   -0.37    1.27 
  24   0   2   -0.28    1.70 
 -24   0  -2   -0.48    1.44 
  26   0   2   -1.20    1.52 
  26   0   2    0.25    1.40 
  26   0   2    3.56    2.02 
  26   0   2   -1.33    1.20 
 -26   0  -2   -0.49    1.62 
 -26   0  -2   -0.16    1.88 
 -26   0  -2    0.77    1.79 
  26   0   2    1.12    2.16 
 -28   0  -2    7.13    2.35 
  28   0   2    8.70    2.66 
  28   0   2   11.93    1.84 
 -28   0  -2    7.62    2.43 
  28   0   2   11.92    2.14 
  28   0   2   12.92    1.88 
 -30   0  -2    5.81    2.68 
  30   0   2   -2.76    1.93 
 -30   0  -2    8.59    3.12 
  30   0   2    2.11    1.91 
 -32   0  -2    4.14    3.60 
  32   0   2    7.34    2.54 
 -32   0  -2   12.03    3.37 
  32   0   2    7.64    2.81 
  35  -1  -2    2.61    2.87 
 -35  -1   2   -2.35    3.15 
 -35  -1   2    6.91    3.18 
  35  -1  -2    4.18    2.97 
  35  -1  -2    4.28    2.80 
  35   1  -2    4.16    2.79 
 -35   1   2    6.67    3.36 
  35   1  -2   -2.08    3.08 
  35   1  -2   -0.54    2.45 
  35   1  -2   -3.40    3.76 
 -35   1   2    4.57    3.49 
 -33  -1   2    6.18    2.63 
  33  -1  -2   -2.44    2.28 
  33  -1  -2    3.21    2.32 
 -33  -1   2    2.27    2.72 
  33  -1  -2   -0.75    1.94 
  33  -1  -2    1.27    2.09 
  33   1  -2    4.33    3.22 
  33   1  -2   -0.30    1.83 
  33   1  -2   -0.12    2.37 
  33   1  -2   -5.22    2.64 
 -33   1   2   -6.77    2.71 
 -33   1   2    8.36    3.05 
  33   1  -2   -0.91    2.43 
 -31  -1   2   11.28    2.53 
  31  -1  -2   10.45    2.68 
 -31  -1   2   14.17    2.72 
  31  -1  -2   11.70    2.48 
  31  -1  -2   13.39    2.18 
  31  -1  -2   10.87    2.24 
  31  -1  -2    8.93    1.96 
 -31   1   2    8.31    2.54 
  31   1  -2    9.31    2.36 
  31   1  -2    9.99    1.86 
  31   1  -2   12.74    2.76 
  31   1  -2   10.46    2.34 
  31   1  -2    9.68    2.37 
 -31   1   2   15.88    2.67 
 -31   1   2   10.68    2.29 
  29  -1  -2    0.94    1.71 
  29  -1  -2    0.15    1.35 
  29  -1  -2    2.81    1.91 
 -29  -1   2    0.48    1.83 
  29  -1  -2    2.82    1.52 
  29  -1  -2   -1.36    1.94 
 -29  -1   2    4.99    1.60 
 -29  -1   2    0.33    1.78 
  29  -1  -2    1.09    1.63 
  29   1  -2    1.78    1.68 
 -29   1   2    0.77    1.85 
  29   1  -2    1.23    1.58 
  29   1  -2    1.03    1.75 
 -29   1   2    1.67    1.63 
 -29   1   2    3.67    1.89 
  29   1  -2    3.49    1.45 
  29   1  -2    0.74    2.01 
 -27  -1   2    5.60    1.43 
  27  -1  -2    6.57    1.35 
  27  -1  -2    3.84    1.57 
  27  -1  -2    3.89    1.81 
 -27  -1   2    4.07    1.66 
  27  -1  -2    5.53    1.53 
 -27  -1   2    1.50    1.43 
 -27  -1   2    5.36    1.95 
  27  -1  -2    3.21    1.21 
  27   1  -2    6.84    1.67 
  27   1  -2    5.45    1.44 
 -27   1   2    6.70    1.78 
  27   1  -2    6.14    1.74 
  27   1  -2    5.25    1.55 
 -27   1   2    4.58    1.43 
  27   1  -2    3.01    1.16 
  27   1  -2    6.63    1.72 
 -27   1   2    4.26    1.48 
 -27   1   2    6.09    1.82 
 -25  -1   2    1.75    1.14 
  25  -1  -2    1.67    1.05 
  25  -1  -2   -0.13    1.07 
  25  -1  -2    0.93    0.99 
 -25  -1   2   -0.12    0.97 
  25  -1  -2    2.13    1.41 
 -25  -1   2    0.72    1.37 
  25  -1  -2    2.36    1.52 
 -25  -1   2    0.97    1.32 
  25  -1  -2    1.55    1.26 
  25   1  -2    2.47    1.45 
 -25   1   2    0.42    1.18 
  25   1  -2    0.89    0.93 
  25   1  -2    1.35    1.21 
 -25   1   2   -1.93    1.23 
 -25   1   2    1.62    1.09 
  25   1  -2    0.99    1.06 
  25   1  -2    1.94    1.10 
 -25   1   2    1.38    1.36 
  23  -1  -2   -0.11    0.98 
  23  -1  -2    0.01    1.13 
  23  -1  -2    0.19    1.25 
  23  -1  -2    1.50    0.96 
  23  -1  -2    0.92    0.84 
  23  -1  -2   -1.43    0.97 
 -23  -1   2   -1.41    1.07 
 -23  -1   2   -0.12    0.88 
  23  -1  -2    0.91    0.96 
 -23  -1   2   -0.68    0.92 
 -23  -1   2   -0.67    1.12 
  23   1  -2    0.43    0.77 
  23   1  -2   -0.24    1.02 
  23   1  -2    0.38    1.04 
  23   1  -2    0.99    0.86 
 -23   1   2   -0.10    0.97 
 -23   1   2    0.30    0.81 
 -23   1   2    0.79    1.36 
  23   1  -2    2.07    1.04 
  23   1  -2    1.19    0.99 
 -23   1   2    0.32    1.10 
  21  -1  -2    3.79    1.10 
  21  -1  -2    2.12    0.94 
  21  -1  -2    2.64    0.83 
  21  -1  -2    3.84    0.85 
  21  -1  -2    2.94    0.89 
 -21  -1   2    3.77    0.95 
  21  -1  -2    3.86    1.07 
 -21  -1   2    1.13    0.78 
 -21  -1   2    3.13    1.01 
  21  -1  -2    2.96    0.86 
 -21  -1   2    3.10    1.00 
 -21   1   2    2.35    0.68 
 -21   1   2    2.31    1.00 
 -21   1   2    3.94    0.98 
  21   1  -2    3.09    0.98 
  21   1  -2    2.86    0.75 
  21   1  -2    3.59    0.87 
  21   1  -2    3.41    0.99 
  21   1  -2    1.10    0.85 
 -21   1   2    3.49    1.25 
  21   1  -2    2.04    0.96 
  19  -1  -2    5.03    0.78 
  19  -1  -2    5.05    0.75 
  19  -1  -2    4.64    0.90 
 -19  -1   2    5.80    0.89 
  19  -1  -2    4.62    0.85 
  19  -1  -2    3.72    0.82 
  19  -1  -2    6.77    1.14 
 -19  -1   2    2.67    0.94 
 -19  -1   2    4.09    0.85 
  19  -1  -2    2.77    0.85 
 -19  -1   2    7.30    1.06 
 -19   1   2    4.21    0.96 
  19   1  -2    4.95    0.89 
 -19   1   2    6.07    0.87 
  19   1  -2    4.79    0.83 
  19   1  -2    3.55    0.68 
  19   1  -2    4.44    0.91 
 -19   1   2    5.34    0.98 
  19   1  -2    5.01    0.89 
  19   1  -2    4.10    0.91 
 -19   1   2    3.44    1.01 
 -17  -1   2   39.27    1.88 
 -17  -1   2   40.29    1.59 
  17  -1  -2   37.35    1.71 
 -17  -1   2   40.03    1.63 
  17  -1  -2   40.30    1.79 
  17  -1  -2   40.50    1.57 
  17  -1  -2   40.14    1.89 
  17  -1  -2   39.12    1.54 
 -17  -1   2   41.89    1.74 
  17  -1  -2   40.57    1.45 
  17  -1  -2   32.30    1.62 
 -17   1   2   41.96    1.88 
  17   1  -2   39.18    1.50 
 -17   1   2   40.27    1.72 
  17   1  -2   33.74    1.66 
  17   1  -2   40.84    1.67 
  17   1  -2   40.39    1.75 
 -17   1   2   38.02    1.47 
  17   1  -2   39.37    1.62 
  17   1  -2   41.03    1.78 
 -15  -1   2   74.93    2.07 
  15  -1  -2   75.47    2.26 
  15  -1  -2   69.94    1.85 
  15  -1  -2   75.48    2.42 
  15  -1  -2   76.61    2.23 
 -15  -1   2   76.90    2.35 
 -15  -1   2   76.83    2.16 
 -15  -1   2   76.21    2.16 
  15  -1  -2   72.46    2.26 
  15  -1  -2   72.86    2.00 
  15  -1  -2   73.01    2.06 
  15   1  -2   73.08    2.01 
  15   1  -2   74.28    2.10 
  15   1  -2   74.11    2.24 
 -15   1   2   73.31    2.20 
  15   1  -2   75.77    2.19 
 -15   1   2   77.40    2.01 
  15   1  -2   75.92    2.10 
 -15   1   2   73.69    2.29 
  13  -1  -2   51.09    1.74 
 -13  -1   2   52.99    1.63 
  13  -1  -2   54.12    1.69 
 -13  -1   2   52.02    1.62 
  13  -1  -2   51.48    1.81 
 -13  -1   2   51.65    1.74 
 -13  -1   2   51.02    1.54 
  13  -1  -2   50.52    1.51 
  13  -1  -2   51.99    1.59 
  13  -1  -2   53.83    1.76 
  13   1  -2   53.81    1.58 
 -13   1   2   51.66    1.71 
  13   1  -2   51.99    1.59 
 -13   1   2   54.06    1.94 
  13   1  -2   52.35    1.66 
 -13   1   2   55.15    1.54 
  13   1  -2   51.75    1.71 
 -13   1   2   52.96    1.77 
  13   1  -2   51.59    1.53 
  11  -1  -2   65.77    1.63 
  11  -1  -2   68.56    1.81 
  11  -1  -2   67.44    1.90 
  11  -1  -2   68.77    2.01 
 -11  -1   2   69.54    1.77 
  11  -1  -2   67.83    1.77 
  11  -1  -2   69.18    1.88 
 -11  -1   2   67.46    1.67 
 -11  -1   2   68.49    1.85 
 -11  -1   2   66.81    1.73 
 -11   1   2   66.99    1.87 
  11   1  -2   67.15    1.88 
 -11   1   2   67.21    1.91 
 -11   1   2   68.06    2.04 
  11   1  -2   66.31    1.69 
  11   1  -2   64.44    1.75 
  11   1  -2   71.99    1.74 
  11   1  -2   65.99    1.66 
 -11   1   2   66.78    1.69 
  -9  -1   2   61.25    1.46 
  -9  -1   2   62.68    1.59 
   9  -1  -2   60.72    1.65 
  -9  -1   2   61.68    1.54 
  -9  -1   2   59.41    1.42 
   9  -1  -2   59.72    1.63 
   9  -1  -2   59.58    1.53 
   9  -1  -2   61.34    1.57 
   9  -1  -2   58.73    1.72 
   9  -1  -2   58.61    1.40 
  -9   1   2   61.65    1.79 
  -9   1   2   60.85    1.67 
   9   1  -2   61.20    1.47 
   9   1  -2   59.98    1.45 
   9   1  -2   60.73    1.43 
   9   1  -2   59.07    1.50 
   9   1  -2   57.59    1.64 
  -9   1   2   60.26    1.63 
  -9   1   2   61.73    1.51 
   7  -1  -2  722.53   11.48 
  -7  -1   2  718.15   11.19 
   7  -1  -2  721.54   11.73 
  -7  -1   2  735.95   11.90 
  -7  -1   2  720.10   11.37 
   7  -1  -2  729.69   11.28 
   7  -1  -2  739.92   12.02 
  -7  -1   2  739.56   11.50 
   7  -1  -2  753.72   11.56 
   7  -1  -2  723.78   11.84 
   7   1  -2  733.48   12.01 
   7   1  -2  747.71   11.49 
   7   1  -2  728.57   11.84 
   7   1  -2  735.77   11.41 
  -7   1   2  738.17   11.72 
  -7   1   2  748.51   11.97 
  -7   1   2  713.75   11.49 
   7   1  -2  706.99   11.56 
  -7   1   2  733.56   11.32 
  -7   1   2  721.04   11.85 
   7   1  -2  723.86   11.15 
   5  -1  -2  134.56    2.74 
  -5  -1   2  140.68    2.55 
   5  -1  -2  138.19    2.42 
   5  -1  -2  137.48    2.71 
   5  -1  -2  139.87    2.59 
   5  -1  -2  136.12    2.62 
   5  -1  -2  138.44    2.69 
  -5   1   2  137.89    2.67 
   5   1  -2  142.25    2.71 
   5   1  -2  136.59    2.59 
  -5   1   2  142.30    2.69 
   5   1  -2  141.41    2.52 
  -5   1   2  134.55    2.63 
  -5   1   2  141.93    2.44 
   5   1  -2  139.53    2.38 
  -5   1   2  139.89    2.55 
   5   1  -2  137.99    2.41 
   3  -1  -2  591.89    9.30 
   3  -1  -2  588.83    9.05 
  -3  -1   2  574.22    9.10 
  -3  -1   2  609.45    9.36 
   3  -1  -2  580.26    9.35 
  -3  -1   2  561.38    9.13 
   3  -1  -2  568.23    9.10 
   3  -1  -2  609.54    9.28 
  -3   1   2  584.67    9.24 
   3   1  -2  597.71    9.33 
  -3   1   2  580.76    9.11 
  -3   1   2  586.11    9.36 
  -3   1   2  585.80    9.04 
  -3   1   2  575.95    9.28 
   3   1  -2  570.44    9.09 
   3   1  -2  580.95    9.16 
  -1  -1   2  171.05    3.04 
   1  -1  -2  172.84    3.15 
   1  -1  -2  170.43    3.04 
  -1  -1   2  174.17    2.93 
   1  -1  -2  174.01    3.03 
   1  -1  -2  189.36    3.13 
   1  -1  -2  177.94    3.10 
  -1   1   2  175.67    3.14 
   1   1  -2  179.62    2.90 
   1   1  -2  170.80    2.92 
  -1   1   2  183.10    3.06 
  -1   1   2  170.40    3.10 
   1   1  -2  177.91    2.89 
  -1   1   2  178.18    3.03 
  -1   1   2  176.50    3.11 
   1   1  -2  174.90    3.02 
  -1  -1  -2  369.91    6.06 
  -1  -1  -2  364.91    6.08 
  -1  -1  -2  373.18    6.32 
   1  -1   2  371.04    5.98 
   1  -1   2  372.93    5.95 
   1  -1   2  372.90    5.80 
  -1  -1  -2  367.18    5.93 
   1  -1   2  331.03    5.98 
   1  -1   2  382.02    5.87 
   1  -1   2  377.51    5.99 
  -1   1  -2  373.36    5.97 
  -1   1  -2  383.48    5.85 
   1   1   2  375.75    6.08 
  -1   1  -2  384.79    6.02 
   1   1   2  368.17    5.92 
   1   1   2  365.83    6.06 
  -1   1  -2  375.06    5.80 
  -3  -1  -2  367.91    6.55 
   3  -1   2  381.69    6.31 
  -3  -1  -2  374.84    6.15 
   3  -1   2  378.23    6.25 
   3  -1   2  377.62    5.99 
  -3  -1  -2  380.21    5.98 
  -3  -1  -2  374.14    6.29 
  -3  -1  -2  377.57    6.29 
   3  -1   2  388.90    6.16 
   3  -1   2  368.85    6.18 
   3  -1   2  387.79    6.15 
   3   1   2  375.83    6.29 
  -3   1  -2  369.56    6.17 
   3   1   2  377.38    6.54 
   3   1   2  384.33    5.97 
  -3   1  -2  398.87    6.13 
   3   1   2  374.56    6.14 
  -3   1  -2  382.39    6.15 
   3   1   2  380.46    6.27 
  -3   1  -2  386.58    6.35 
  -3   1  -2  388.66    6.26 
   5  -1   2  121.17    2.49 
  -5  -1  -2  118.27    2.41 
  -5  -1  -2  117.77    2.62 
  -5  -1  -2  119.94    2.47 
   5  -1   2  120.26    2.50 
  -5  -1  -2  118.37    2.50 
  -5  -1  -2  119.53    2.35 
  -5  -1  -2  121.34    2.45 
   5  -1   2  117.94    2.44 
   5  -1   2  131.07    2.26 
   5  -1   2  119.27    2.55 
   5   1   2  124.23    2.36 
  -5   1  -2  120.10    2.46 
  -5   1  -2  119.24    2.46 
  -5   1  -2  120.53    2.49 
   5   1   2  120.47    2.49 
   5   1   2  118.56    2.56 
  -5   1  -2  122.06    2.22 
   5   1   2  116.86    2.57 
  -5   1  -2  121.28    2.60 
  -7  -1  -2  136.29    2.97 
   7  -1   2  133.87    2.83 
   7  -1   2  134.44    2.56 
  -7  -1  -2  137.43    2.80 
  -7  -1  -2  136.16    2.95 
   7  -1   2  135.88    2.93 
  -7  -1  -2  135.43    2.89 
  -7  -1  -2  135.40    2.80 
   7  -1   2  134.19    2.86 
  -7  -1  -2  131.92    2.71 
   7  -1   2  135.88    2.81 
  -7   1  -2  133.38    2.55 
  -7   1  -2  133.60    2.85 
   7   1   2  132.90    2.78 
  -7   1  -2  133.32    2.82 
   7   1   2  133.20    2.85 
  -7   1  -2  131.69    2.80 
   7   1   2  131.57    2.91 
   7   1   2  131.61    2.85 
   7   1   2  137.17    2.70 
  -7   1  -2  134.08    2.99 
  -9  -1  -2   26.15    1.14 
   9  -1   2   26.16    1.16 
  -9  -1  -2   25.68    1.19 
   9  -1   2   26.39    1.23 
   9  -1   2   27.83    1.21 
   9  -1   2   24.66    1.12 
  -9  -1  -2   26.03    1.13 
  -9  -1  -2   24.32    1.10 
  -9  -1  -2   25.15    1.16 
  -9  -1  -2   24.43    1.14 
   9  -1   2   25.34    0.90 
  -9   1  -2   22.98    1.06 
  -9   1  -2   25.47    1.26 
   9   1   2   24.55    1.12 
   9   1   2   24.82    1.16 
  -9   1  -2   25.29    1.16 
   9   1   2   24.82    1.07 
   9   1   2   25.15    1.07 
  -9   1  -2   24.76    1.13 
   9   1   2   25.32    1.14 
  -9   1  -2   25.24    0.92 
   9   1   2   24.94    1.10 
  11  -1   2    1.75    0.61 
  11  -1   2    1.40    0.36 
 -11  -1  -2    0.58    0.50 
 -11  -1  -2    1.54    0.62 
 -11  -1  -2    0.67    0.53 
 -11  -1  -2    1.51    0.56 
  11  -1   2    2.04    0.62 
  11  -1   2    1.77    0.55 
 -11  -1  -2    0.46    0.49 
  11  -1   2    1.17    0.55 
 -11  -1  -2    1.33    0.56 
  11   1   2    0.88    0.44 
 -11   1  -2    1.27    0.42 
 -11   1  -2    0.74    0.50 
  11   1   2    0.79    0.49 
  11   1   2    0.48    0.46 
  11   1   2    1.14    0.56 
 -11   1  -2    1.29    0.50 
  11   1   2    1.05    0.55 
  11   1   2    1.32    0.53 
 -11   1  -2    0.21    0.55 
 -11   1  -2    0.30    0.42 
  13  -1   2    1.04    0.45 
 -13  -1  -2    0.99    0.56 
  13  -1   2    0.38    0.65 
 -13  -1  -2    0.60    0.62 
  13  -1   2    1.10    0.41 
 -13  -1  -2    1.51    0.56 
  13  -1   2    0.80    0.63 
  13  -1   2    0.45    0.62 
 -13  -1  -2    1.29    0.62 
  13  -1   2    0.91    0.55 
 -13  -1  -2    0.86    0.60 
  13   1   2    0.36    0.47 
 -13   1  -2    1.23    0.61 
  13   1   2    0.82    0.59 
 -13   1  -2    0.51    0.49 
 -13   1  -2    0.71    0.46 
  13   1   2    1.16    0.55 
  13   1   2    1.07    0.59 
 -13   1  -2    0.25    0.62 
  13   1   2    0.12    0.55 
  13   1   2    0.31    0.52 
 -13   1  -2    0.36    0.75 
 -13   1  -2    0.99    0.37 
  15  -1   2   82.90    2.21 
  15  -1   2   82.80    2.63 
 -15  -1  -2   79.92    2.50 
 -15  -1  -2   81.02    2.50 
 -15  -1  -2   80.40    2.54 
  15  -1   2   85.45    2.61 
 -15  -1  -2   81.63    2.56 
  15  -1   2   66.18    2.53 
  15  -1   2   82.28    2.03 
 -15  -1  -2   81.73    2.69 
  15  -1   2   82.50    2.60 
  15   1   2   82.96    2.50 
  15   1   2   81.64    2.36 
  15   1   2   81.77    2.54 
 -15   1  -2   78.82    2.57 
 -15   1  -2   85.22    2.30 
  15   1   2   81.39    2.59 
 -15   1  -2   83.16    2.85 
  15   1   2   81.21    2.54 
 -15   1  -2   77.76    2.47 
 -15   1  -2   79.75    2.62 
  15   1   2   82.72    2.48 
  17  -1   2   28.41    1.75 
 -17  -1  -2   27.60    1.86 
 -17  -1  -2   25.42    1.66 
  17  -1   2   28.51    1.93 
 -17  -1  -2   23.99    1.70 
  17  -1   2   27.39    1.73 
  17  -1   2   26.99    1.25 
  17  -1   2   26.92    1.92 
  17  -1   2   27.73    1.38 
 -17  -1  -2   26.93    1.68 
 -17   1  -2   23.65    1.70 
 -17   1  -2   27.38    1.47 
  17   1   2   25.09    1.75 
 -17   1  -2   25.97    1.78 
  17   1   2   25.65    1.77 
  17   1   2   27.76    1.68 
  17   1   2   26.70    1.47 
 -17   1  -2   26.88    2.02 
 -17   1  -2   27.96    1.70 
  17   1   2   25.07    1.62 
  17   1   2   25.63    1.73 
 -19  -1  -2   19.07    1.80 
 -19  -1  -2   14.19    1.79 
  19  -1   2   17.98    1.97 
  19  -1   2   18.41    1.92 
  19  -1   2   18.71    1.38 
 -19  -1  -2   17.16    1.74 
  19  -1   2   19.17    1.29 
  19  -1   2   15.80    1.75 
 -19  -1  -2   19.04    1.65 
  19  -1   2   17.92    1.71 
 -19  -1  -2   14.98    1.97 
  19   1   2   17.52    1.88 
  19   1   2   20.61    1.68 
 -19   1  -2   19.46    1.53 
 -19   1  -2   18.87    1.98 
 -19   1  -2   16.86    1.79 
  19   1   2   17.98    1.46 
  19   1   2   18.47    1.74 
  19   1   2   18.56    1.88 
  19   1   2   16.96    1.64 
 -19   1  -2   21.33    1.71 
 -19   1  -2   17.31    1.83 
  21  -1   2   16.91    1.41 
 -21  -1  -2   14.83    1.82 
 -21  -1  -2   15.69    2.03 
 -21  -1  -2   15.44    1.89 
  21  -1   2   16.38    1.84 
  21  -1   2   15.31    1.51 
 -21  -1  -2   17.72    1.80 
 -21  -1  -2   16.60    1.79 
  21  -1   2   18.55    2.31 
  21  -1   2   15.26    1.99 
  21   1   2   15.38    1.88 
  21   1   2   18.77    1.83 
 -21   1  -2   15.54    1.88 
 -21   1  -2   17.91    2.25 
 -21   1  -2   16.59    1.79 
  21   1   2   16.47    1.74 
  21   1   2   15.66    1.94 
 -21   1  -2   15.56    1.99 
  21   1   2   14.59    1.56 
 -23  -1  -2    6.69    1.65 
 -23  -1  -2    4.84    1.38 
  23  -1   2    5.58    1.42 
  23  -1   2    5.64    1.65 
 -23  -1  -2    5.18    1.50 
  23  -1   2    4.78    1.20 
  23  -1   2    6.44    1.75 
 -23  -1  -2    4.24    1.60 
 -23  -1  -2    3.80    1.46 
 -23   1  -2    4.80    1.79 
 -23   1  -2    3.66    1.47 
  23   1   2    5.37    1.59 
  23   1   2    4.81    1.33 
  23   1   2    2.46    1.04 
  23   1   2    5.57    1.44 
 -23   1  -2    6.29    1.40 
  23   1   2    2.41    1.55 
 -25  -1  -2    5.83    1.82 
 -25  -1  -2    9.60    2.04 
 -25  -1  -2    7.56    1.94 
  25  -1   2    6.80    1.58 
 -25  -1  -2    6.49    1.91 
  25  -1   2    7.71    1.48 
  25  -1   2    6.48    2.09 
  25   1   2    7.07    1.40 
  25   1   2    8.19    1.65 
 -25   1  -2    7.01    1.91 
 -25   1  -2    8.47    2.13 
  25   1   2    8.40    2.03 
  25   1   2    7.97    1.91 
 -25   1  -2    7.44    1.65 
  25   1   2    6.18    1.72 
  27  -1   2    3.27    1.55 
 -27  -1  -2    2.20    1.96 
  27  -1   2   -3.35    2.30 
 -27  -1  -2    3.98    2.22 
 -27  -1  -2    3.58    2.25 
  27  -1   2    1.11    1.74 
  27   1   2    2.50    1.45 
 -27   1  -2    1.84    1.88 
  27   1   2    1.95    1.74 
 -27   1  -2    3.96    2.16 
  27   1   2    0.70    2.20 
 -27   1  -2    2.49    2.39 
  27   1   2    1.80    1.78 
  29  -1   2    3.95    1.83 
 -29  -1  -2    3.67    2.55 
 -29  -1  -2   -4.25    2.34 
  29  -1   2    1.06    2.24 
 -29   1  -2   -0.47    2.63 
  29   1   2    3.78    2.92 
  29   1   2    2.36    2.03 
 -29   1  -2    7.58    2.52 
  29   1   2    3.66    1.64 
  31  -1   2    3.40    2.24 
 -31  -1  -2    5.02    3.37 
  31  -1   2    4.96    2.46 
 -31  -1  -2    2.45    2.97 
 -31  -1  -2    6.58    3.30 
 -31   1  -2   -1.28    3.04 
 -31   1  -2    1.42    2.91 
  31   1   2    3.82    2.65 
  31   1   2   -3.11    2.52 
  33  -1   2    1.57    3.32 
 -33  -1  -2    2.55    3.66 
  33  -1   2   -2.26    3.05 
 -33  -1  -2    7.39    3.67 
  33  -1   2    5.78    3.00 
 -33   1  -2    2.58    3.68 
  33   1   2    5.39    2.69 
 -33   1  -2    4.02    3.64 
  33   1   2    1.13    2.83 
  34  -2  -2   -0.22    2.64 
 -34  -2   2    2.13    3.17 
  34  -2  -2    2.02    2.70 
 -34  -2   2    6.32    3.17 
  34  -2  -2    5.90    2.75 
  34   2  -2    4.29    2.72 
  34   2  -2    2.64    2.18 
 -34   2   2    4.57    3.63 
  34   2  -2    2.71    2.98 
 -34   2   2   -1.04    3.20 
 -32  -2   2   15.66    3.00 
 -32  -2   2   11.14    2.60 
  32  -2  -2   11.24    2.63 
  32  -2  -2    6.68    2.32 
  32  -2  -2   11.30    2.49 
 -32   2   2   11.07    3.08 
 -32   2   2   12.18    2.90 
  32   2  -2    9.10    2.42 
  32   2  -2   11.61    2.97 
  32   2  -2    7.42    2.65 
  32   2  -2    9.47    2.09 
 -30  -2   2    2.07    2.17 
  30  -2  -2    5.25    2.03 
  30  -2  -2    5.47    2.06 
  30  -2  -2    3.04    2.03 
 -30  -2   2    3.63    2.29 
 -30   2   2    5.21    2.52 
 -30   2   2    0.57    2.29 
  30   2  -2    2.56    2.26 
  30   2  -2    1.71    1.81 
  30   2  -2    5.83    1.64 
  30   2  -2    2.52    2.29 
  30   2  -2    5.75    2.09 
 -28  -2   2    0.72    1.88 
  28  -2  -2    5.10    1.63 
 -28  -2   2    1.93    1.82 
  28  -2  -2    2.38    1.64 
  28  -2  -2    1.85    1.51 
  28  -2  -2    3.21    2.08 
  28  -2  -2    0.89    1.81 
  28   2  -2    2.91    1.77 
  28   2  -2    6.65    2.00 
 -28   2   2    0.84    1.86 
  28   2  -2   -1.38    1.86 
  28   2  -2    1.03    1.58 
 -28   2   2    5.50    2.36 
  28   2  -2    3.51    1.93 
  28   2  -2    1.60    1.27 
 -28   2   2    0.45    1.52 
 -26  -2   2   24.52    2.66 
  26  -2  -2   24.07    1.80 
  26  -2  -2   28.66    2.38 
  26  -2  -2   23.43    2.90 
  26  -2  -2   19.73    2.44 
  26  -2  -2   23.13    2.24 
 -26  -2   2   22.46    2.73 
  26  -2  -2   28.41    3.07 
  26   2  -2   19.95    2.17 
  26   2  -2   30.30    2.71 
  26   2  -2   22.44    1.90 
 -26   2   2   29.25    3.10 
  26   2  -2   29.17    2.72 
 -26   2   2   23.61    2.49 
  26   2  -2   25.20    2.52 
 -26   2   2   17.65    2.05 
  26   2  -2   26.17    2.30 
 -26   2   2   25.39    2.85 
 -24  -2   2    5.25    1.45 
 -24  -2   2    3.56    1.38 
  24  -2  -2    3.86    1.50 
  24  -2  -2    3.74    1.62 
  24  -2  -2    5.77    1.36 
  24  -2  -2    5.31    1.59 
  24  -2  -2    5.35    1.23 
  24  -2  -2    7.78    1.32 
  24  -2  -2    6.43    0.95 
 -24   2   2    6.56    1.51 
 -24   2   2    7.66    1.65 
  24   2  -2    4.44    1.08 
  24   2  -2    7.55    1.32 
 -24   2   2    5.54    1.13 
  24   2  -2    5.92    1.32 
 -24   2   2    2.20    1.33 
  24   2  -2    7.09    1.43 
  24   2  -2    6.94    1.52 
  24   2  -2    6.12    1.46 
 -22  -2   2    4.09    1.28 
  22  -2  -2    6.12    1.12 
  22  -2  -2    5.01    1.12 
  22  -2  -2    4.60    1.36 
  22  -2  -2    4.02    1.16 
 -22  -2   2    5.38    1.14 
  22  -2  -2    6.09    1.20 
 -22  -2   2    4.97    1.16 
  22  -2  -2    5.84    0.85 
  22  -2  -2    5.32    1.36 
  22   2  -2    5.73    1.17 
  22   2  -2    3.87    1.04 
 -22   2   2    4.98    1.28 
 -22   2   2    6.10    1.15 
  22   2  -2    5.25    1.26 
 -22   2   2    6.03    1.02 
 -22   2   2    4.24    1.30 
  22   2  -2    4.46    1.20 
  22   2  -2    5.92    1.14 
  20  -2  -2   71.39    2.52 
  20  -2  -2   68.03    1.93 
 -20  -2   2   68.13    2.26 
  20  -2  -2   68.34    2.68 
 -20  -2   2   69.54    2.57 
 -20  -2   2   65.64    2.64 
  20  -2  -2   67.93    2.81 
  20  -2  -2   73.37    2.31 
  20  -2  -2   64.88    2.62 
 -20  -2   2   70.54    2.53 
  20  -2  -2   67.46    2.55 
 -20   2   2   71.18    2.30 
 -20   2   2   67.79    2.60 
  20   2  -2   70.10    2.46 
  20   2  -2   70.28    2.49 
  20   2  -2   66.62    2.30 
 -20   2   2   68.80    2.99 
  20   2  -2   66.95    2.37 
  20   2  -2   68.58    2.59 
 -20   2   2   64.56    2.69 
  20   2  -2   70.12    2.73 
  18  -2  -2    6.43    1.10 
  18  -2  -2    8.02    1.14 
  18  -2  -2    7.80    1.00 
  18  -2  -2    6.87    1.02 
 -18  -2   2    8.41    1.00 
  18  -2  -2    7.20    1.00 
 -18  -2   2    7.33    1.19 
  18  -2  -2    8.53    0.91 
 -18  -2   2    8.21    1.04 
  18  -2  -2    7.73    0.87 
 -18  -2   2    8.30    0.98 
  18   2  -2    8.89    1.01 
  18   2  -2    8.08    0.97 
  18   2  -2    6.75    1.08 
  18   2  -2    7.20    1.00 
 -18   2   2    7.16    0.87 
  18   2  -2    7.61    1.12 
 -18   2   2    8.51    1.23 
 -18   2   2    5.48    1.08 
  18   2  -2    7.81    0.94 
 -18   2   2    7.83    1.05 
 -16  -2   2   18.47    1.08 
  16  -2  -2   19.75    1.55 
 -16  -2   2   18.53    1.38 
  16  -2  -2   19.30    1.27 
 -16  -2   2   19.87    1.35 
  16  -2  -2   19.09    1.35 
  16  -2  -2   19.90    1.31 
 -16  -2   2   19.10    1.27 
  16  -2  -2   20.38    1.11 
  16  -2  -2   19.18    1.44 
  16   2  -2   21.54    1.26 
  16   2  -2   19.76    1.26 
 -16   2   2   18.19    1.28 
 -16   2   2   20.16    1.59 
 -16   2   2   19.65    1.46 
 -16   2   2   20.54    1.15 
  16   2  -2   20.42    1.39 
  16   2  -2   21.26    1.16 
  16   2  -2   18.90    1.17 
 -14  -2   2   11.12    1.04 
  14  -2  -2   10.27    0.98 
 -14  -2   2   11.26    1.01 
 -14  -2   2    8.71    0.93 
  14  -2  -2    9.44    0.94 
  14  -2  -2   10.36    1.11 
  14  -2  -2   10.82    1.02 
  14  -2  -2    9.99    1.15 
 -14  -2   2   11.45    0.81 
 -14  -2   2   11.63    1.08 
  14  -2  -2   10.29    0.80 
  14   2  -2   12.61    0.94 
 -14   2   2    8.50    0.95 
  14   2  -2   11.07    0.87 
  14   2  -2   11.49    0.93 
 -14   2   2   12.04    1.24 
 -14   2   2    9.60    1.13 
  14   2  -2   13.34    1.17 
 -14   2   2    9.08    0.83 
  14   2  -2   11.22    0.86 
  12  -2  -2   -0.13    0.47 
  12  -2  -2    0.84    0.47 
  12  -2  -2    0.78    0.49 
  12  -2  -2    1.81    0.61 
 -12  -2   2    1.43    0.45 
 -12  -2   2    0.45    0.47 
 -12  -2   2    0.99    0.45 
 -12  -2   2    0.73    0.34 
  12  -2  -2    1.12    0.42 
  12  -2  -2    1.05    0.51 
 -12  -2   2    1.33    0.53 
  12  -2  -2    0.74    0.44 
 -12   2   2    0.67    0.58 
  12   2  -2    0.92    0.35 
  12   2  -2    0.91    0.59 
  12   2  -2    1.30    0.51 
 -12   2   2    0.70    0.37 
  12   2  -2    1.27    0.41 
 -12   2   2    1.01    0.56 
 -12   2   2    0.59    0.48 
  12   2  -2    1.34    0.44 
  10  -2  -2    5.24    0.71 
 -10  -2   2    5.14    0.58 
  10  -2  -2    5.82    0.70 
  10  -2  -2    6.03    0.56 
  10  -2  -2    5.73    0.70 
 -10  -2   2    5.40    0.47 
 -10  -2   2    5.50    0.69 
  10  -2  -2    5.54    0.66 
  10  -2  -2    4.63    0.66 
 -10  -2   2    5.85    0.75 
  10  -2  -2    5.32    0.67 
  10   2  -2    5.41    0.56 
 -10   2   2    4.74    0.60 
 -10   2   2    5.00    0.65 
  10   2  -2    5.25    0.51 
 -10   2   2    6.37    0.77 
  10   2  -2    5.27    0.73 
 -10   2   2    4.73    0.73 
  10   2  -2    5.14    0.58 
   8  -2  -2    8.16    0.58 
  -8  -2   2    8.91    0.75 
   8  -2  -2    7.82    0.78 
   8  -2  -2    8.70    0.71 
   8  -2  -2    9.25    0.51 
  -8  -2   2    9.37    0.76 
   8  -2  -2    9.04    0.76 
   8  -2  -2    8.38    0.78 
  -8   2   2    9.01    0.49 
   8   2  -2    9.66    0.80 
  -8   2   2    8.31    0.77 
  -8   2   2    9.07    0.71 
  -8   2   2   10.37    0.70 
   8   2  -2    9.15    0.65 
  -8   2   2   10.49    0.90 
   6  -2  -2   71.33    1.90 
   6  -2  -2   73.53    1.44 
   6  -2  -2   73.12    1.52 
   6  -2  -2   71.28    1.79 
   6  -2  -2   74.66    1.95 
   6  -2  -2   70.83    1.83 
  -6  -2   2   72.35    1.89 
  -6   2   2   71.30    1.43 
   6   2  -2   73.39    1.85 
  -6   2   2   70.94    1.78 
  -6   2   2   71.72    1.83 
  -6   2   2   72.20    1.94 
  -6   2   2   71.04    1.84 
  -6   2   2   71.29    1.84 
   6   2  -2   71.32    1.70 
   6   2  -2   71.14    1.89 
   4  -2  -2   40.65    1.28 
  -4  -2   2   38.28    1.22 
   4  -2  -2   40.90    1.21 
   4  -2  -2   39.05    1.20 
   4  -2  -2   40.57    0.98 
   4  -2  -2   40.16    1.35 
  -4  -2   2   38.76    1.26 
  -4   2   2   39.76    0.96 
  -4   2   2   41.66    1.21 
   4   2  -2   39.90    1.13 
   4   2  -2   39.49    1.11 
  -4   2   2   38.57    1.28 
   4   2  -2   42.70    1.26 
   4   2  -2   40.15    1.29 
  -4   2   2   39.06    1.32 
  -4   2   2   40.67    1.22 
   2  -2  -2   10.82    0.70 
   2  -2  -2   10.22    0.64 
   2  -2  -2   10.25    0.63 
   2  -2  -2   10.40    0.79 
  -2  -2   2   11.64    0.76 
   2  -2  -2   10.90    0.63 
   2   2  -2   11.59    0.54 
  -2   2   2   11.18    0.81 
  -2   2   2   11.79    0.55 
   2   2  -2   12.52    0.76 
   2   2  -2   11.87    0.68 
  -2   2   2   11.57    0.66 
  -2   2   2   12.08    0.71 
  -2   2   2   11.44    0.64 
   2   2  -2   12.08    0.63 
   0  -2   2   87.83    1.63 
   0  -2  -2   86.79    1.87 
   0  -2  -2   86.50    1.86 
   0  -2  -2   88.48    2.08 
   0  -2   2   87.92    2.09 
   0  -2   2   89.17    1.93 
   0  -2  -2   88.62    1.96 
   0  -2  -2   86.65    2.09 
   0   2   2   85.79    1.87 
   0   2   2   86.68    2.13 
   0   2   2   88.05    1.85 
   0   2  -2   88.46    1.63 
   0   2   2   87.55    1.93 
   0   2  -2   85.67    1.90 
   0   2  -2   87.51    2.03 
   0   2  -2   91.39    1.85 
   2  -2   2   24.49    0.81 
   2  -2   2   25.47    0.98 
  -2  -2  -2   25.01    1.07 
  -2  -2  -2   25.23    0.88 
  -2  -2  -2   24.40    0.87 
   2  -2   2   25.42    1.07 
   2  -2   2   26.50    0.84 
  -2  -2  -2   26.73    0.96 
   2  -2   2   25.76    0.86 
   2   2   2   26.95    1.08 
  -2   2  -2   26.39    1.03 
  -2   2  -2   25.23    0.79 
   2   2   2   25.56    0.88 
  -2   2  -2   25.35    0.74 
  -2   2  -2   26.50    0.96 
   2   2   2   24.66    0.85 
   2   2   2   25.71    0.89 
   2   2   2   24.81    1.10 
  -2   2  -2   25.48    0.88 
  -2   2  -2   25.24    0.82 
  -4  -2  -2   16.94    0.95 
   4  -2   2   17.22    0.77 
  -4  -2  -2   16.48    0.78 
  -4  -2  -2   16.14    0.79 
   4  -2   2   15.93    0.88 
   4  -2   2   16.28    0.87 
   4  -2   2   16.22    0.83 
  -4  -2  -2   16.46    0.81 
   4  -2   2   16.19    0.77 
  -4   2  -2   17.48    0.76 
  -4   2  -2   16.92    0.79 
  -4   2  -2   17.68    0.90 
   4   2   2   16.45    0.92 
   4   2   2   16.92    0.79 
   4   2   2   16.02    0.77 
  -4   2  -2   16.76    0.61 
  -4   2  -2   19.39    0.88 
   4   2   2   19.40    0.79 
   6  -2   2   21.71    0.99 
   6  -2   2   22.64    0.98 
  -6  -2  -2   23.54    1.20 
   6  -2   2   22.65    0.87 
  -6  -2  -2   23.03    0.97 
  -6  -2  -2   21.73    0.97 
   6  -2   2   21.91    1.05 
  -6  -2  -2   20.95    0.97 
   6  -2   2   22.08    1.07 
   6  -2   2   20.96    1.07 
   6   2   2   21.05    0.93 
   6   2   2   22.38    0.85 
   6   2   2   21.56    1.12 
   6   2   2   20.63    1.12 
  -6   2  -2   21.95    1.06 
  -6   2  -2   20.86    0.98 
  -6   2  -2   22.30    1.12 
  -6   2  -2   22.69    0.76 
   6   2   2   20.62    0.95 
  -6   2  -2   23.42    0.96 
   8  -2   2    7.17    0.80 
   8  -2   2    7.38    0.54 
   8  -2   2    6.26    0.63 
  -8  -2  -2    6.50    0.85 
  -8  -2  -2    6.56    0.77 
  -8  -2  -2    6.75    0.78 
   8  -2   2    6.98    0.83 
   8  -2   2    6.83    0.86 
  -8  -2  -2    6.31    0.76 
  -8  -2  -2    7.45    0.73 
   8  -2   2    7.67    0.78 
  -8   2  -2    6.75    0.72 
   8   2   2    7.62    0.86 
  -8   2  -2    7.04    0.81 
  -8   2  -2    7.56    0.53 
  -8   2  -2    7.33    0.80 
   8   2   2    7.06    0.79 
   8   2   2    7.00    0.76 
  -8   2  -2    7.47    0.91 
   8   2   2    8.39    0.71 
  10  -2   2   28.36    1.44 
 -10  -2  -2   26.83    1.43 
  10  -2   2   30.02    1.37 
  10  -2   2   29.33    1.38 
 -10  -2  -2   28.16    1.24 
 -10  -2  -2   26.06    1.28 
  10  -2   2   30.58    1.17 
 -10  -2  -2   27.34    1.29 
 -10  -2  -2   28.57    1.30 
  10  -2   2   28.76    1.33 
 -10   2  -2   27.62    1.33 
  10   2   2   29.03    1.40 
 -10   2  -2   29.28    1.51 
  10   2   2   29.62    1.30 
 -10   2  -2   29.59    1.38 
  10   2   2   29.59    1.25 
  10   2   2   29.24    1.37 
 -10   2  -2   29.27    1.30 
 -10   2  -2   31.04    1.04 
  10   2   2   28.65    1.22 
 -12  -2  -2   30.77    1.43 
  12  -2   2   33.61    1.57 
  12  -2   2   32.39    1.64 
 -12  -2  -2   31.52    1.55 
  12  -2   2   32.16    1.30 
 -12  -2  -2   33.85    1.51 
 -12  -2  -2   32.76    1.66 
 -12  -2  -2   33.46    1.47 
  12  -2   2   31.04    1.59 
  12  -2   2   32.35    1.51 
  12   2   2   32.73    1.62 
  12   2   2   33.61    1.43 
 -12   2  -2   30.29    1.70 
  12   2   2   33.83    1.44 
 -12   2  -2   29.90    1.44 
 -12   2  -2   31.44    1.53 
  12   2   2   33.88    1.54 
 -12   2  -2   32.46    1.57 
  12   2   2   32.70    1.49 
 -12   2  -2   34.46    1.20 
  14  -2   2   13.45    1.35 
 -14  -2  -2   15.96    1.33 
  14  -2   2   14.20    1.06 
 -14  -2  -2   13.17    1.33 
 -14  -2  -2   12.69    1.29 
 -14  -2  -2   14.27    1.37 
  14  -2   2   11.27    1.30 
  14  -2   2   14.03    1.49 
  14  -2   2   13.43    1.23 
  14   2   2   13.00    1.15 
 -14   2  -2   11.92    1.14 
 -14   2  -2   12.86    1.35 
  14   2   2   13.19    1.18 
 -14   2  -2   11.00    0.91 
  14   2   2   13.91    1.33 
 -14   2  -2   12.44    1.33 
  14   2   2   13.23    1.25 
 -14   2  -2   11.39    1.41 
  14   2   2   13.14    1.23 
 -16  -2  -2   22.16    1.72 
 -16  -2  -2   24.57    1.76 
  16  -2   2   20.41    1.60 
  16  -2   2   21.16    1.64 
  16  -2   2   25.15    1.77 
 -16  -2  -2   22.97    1.78 
 -16  -2  -2   26.15    1.66 
  16  -2   2   23.69    1.36 
  16  -2   2   22.73    1.89 
 -16  -2  -2   21.76    1.60 
  16   2   2   23.37    1.67 
 -16   2  -2   21.73    1.26 
  16   2   2   22.96    1.56 
 -16   2  -2   26.49    1.76 
  16   2   2   22.62    1.50 
  16   2   2   23.21    1.48 
 -16   2  -2   25.07    1.88 
 -16   2  -2   25.02    1.69 
  16   2   2   26.81    1.75 
 -16   2  -2   22.38    1.54 
 -18  -2  -2   34.91    2.17 
 -18  -2  -2   30.62    2.03 
  18  -2   2   25.19    1.94 
  18  -2   2   29.31    2.22 
  18  -2   2   26.62    1.89 
 -18  -2  -2   32.10    2.12 
  18  -2   2   31.17    1.65 
 -18  -2  -2   30.71    1.95 
 -18  -2  -2   33.41    2.06 
  18  -2   2   26.99    2.08 
  18   2   2   30.19    1.93 
  18   2   2   29.26    1.91 
 -18   2  -2   31.06    1.67 
 -18   2  -2   30.32    2.00 
  18   2   2   31.88    1.77 
  18   2   2   29.34    1.99 
  18   2   2   25.95    1.99 
 -18   2  -2   28.23    2.24 
 -18   2  -2   29.43    1.86 
 -18   2  -2   25.94    2.02 
 -20  -2  -2   48.66    2.78 
  20  -2   2   38.11    2.40 
  20  -2   2   41.97    2.67 
 -20  -2  -2   45.74    2.44 
 -20  -2  -2   43.52    2.46 
 -20  -2  -2   45.21    2.71 
  20  -2   2   44.81    2.06 
  20  -2   2   43.87    2.44 
 -20  -2  -2   44.18    2.48 
  20  -2   2   47.38    2.87 
 -20   2  -2   43.07    2.10 
  20   2   2   41.77    2.41 
  20   2   2   39.57    2.45 
  20   2   2   44.96    2.22 
 -20   2  -2   40.49    2.60 
  20   2   2   43.43    2.32 
 -20   2  -2   39.48    2.39 
  20   2   2   42.10    2.36 
 -20   2  -2   44.08    2.99 
 -20   2  -2   37.94    2.32 
  22  -2   2   40.53    3.10 
  22  -2   2   36.91    2.49 
 -22  -2  -2   41.81    2.74 
 -22  -2  -2   42.46    2.71 
 -22  -2  -2   42.19    2.87 
  22  -2   2   40.79    2.18 
 -22  -2  -2   42.02    2.67 
  22  -2   2   39.63    3.05 
 -22  -2  -2   42.72    2.96 
 -22   2  -2   38.65    2.65 
 -22   2  -2   39.03    2.89 
  22   2   2   39.56    2.61 
 -22   2  -2   39.78    2.28 
  22   2   2   42.63    2.45 
 -22   2  -2   41.80    3.10 
 -22   2  -2   44.25    2.83 
  22   2   2   38.45    2.27 
  22   2   2   41.10    2.69 
 -24  -2  -2   13.90    1.89 
  24  -2   2   13.38    2.31 
 -24  -2  -2   13.43    2.05 
  24  -2   2    9.75    1.65 
 -24  -2  -2   14.61    2.30 
  24  -2   2   15.28    2.03 
 -24  -2  -2   14.16    2.14 
 -24  -2  -2   15.58    2.06 
 -24   2  -2   16.35    2.15 
  24   2   2   10.41    1.77 
  24   2   2   12.94    1.68 
  24   2   2   14.27    1.99 
 -24   2  -2   14.23    1.80 
  24   2   2   14.28    2.05 
 -24   2  -2   11.37    2.12 
  26  -2   2    7.44    2.63 
 -26  -2  -2    6.22    2.07 
  26  -2   2    4.15    1.92 
 -26  -2  -2    3.99    1.87 
  26  -2   2    8.95    1.74 
 -26  -2  -2    2.08    2.00 
 -26  -2  -2    5.90    2.03 
  26   2   2    0.79    1.46 
 -26   2  -2    8.10    2.15 
  26   2   2    4.63    2.05 
 -26   2  -2    7.47    1.91 
 -26   2  -2    4.73    2.41 
  26   2   2    7.27    1.89 
  28  -2   2    5.71    2.18 
 -28  -2  -2    5.08    2.54 
  28  -2   2    4.33    2.12 
 -28  -2  -2    4.68    2.40 
  28  -2   2    4.72    1.96 
 -28  -2  -2    1.52    2.49 
  28   2   2    2.60    2.25 
  28   2   2    4.03    2.16 
 -28   2  -2    3.60    2.38 
 -28   2  -2    3.39    2.77 
  28   2   2    1.61    1.69 
  30  -2   2   17.68    2.79 
  30  -2   2   18.54    3.18 
 -30  -2  -2   10.12    3.20 
 -30  -2  -2   19.46    3.57 
 -30  -2  -2   16.32    3.39 
  30  -2   2   11.71    2.78 
  30   2   2   14.05    2.65 
 -30   2  -2   13.48    3.02 
 -30   2  -2   14.77    3.36 
  30   2   2   14.58    2.37 
  32  -2   2    2.56    3.03 
 -32  -2  -2    3.10    3.54 
  32  -2   2    5.53    2.97 
 -32  -2  -2    6.20    3.44 
  32  -2   2   -1.44    2.92 
  32   2   2    7.02    2.43 
  32   2   2   -1.14    2.83 
 -32   2  -2    1.83    3.72 
 -32   2  -2    4.41    3.51 
  33  -3  -2    5.96    2.60 
 -33  -3   2   10.88    3.23 
  33  -3  -2    1.99    2.93 
  33  -3  -2    7.48    2.92 
 -33  -3   2    1.84    3.07 
  33  -3  -2    1.09    2.71 
 -33   3   2    4.45    3.73 
  33   3  -2    7.90    3.11 
  33   3  -2    6.99    2.25 
  33   3  -2    0.33    2.72 
 -33   3   2    6.83    3.29 
  31  -3  -2   19.02    2.49 
 -31  -3   2   18.37    3.03 
 -31  -3   2   18.24    2.97 
  31  -3  -2   18.37    2.81 
 -31  -3   2   14.97    3.05 
  31  -3  -2    9.01    2.58 
  31  -3  -2   12.14    2.70 
  31   3  -2   10.61    2.96 
  31   3  -2   14.64    2.76 
 -31   3   2   14.60    3.01 
  31   3  -2   11.96    2.51 
  31   3  -2   11.84    2.21 
 -31   3   2   14.62    3.29 
  29  -3  -2    5.22    1.83 
 -29  -3   2    2.56    2.01 
  29  -3  -2    2.81    2.01 
 -29  -3   2    2.97    2.24 
  29  -3  -2    5.59    2.00 
 -29  -3   2    1.15    2.17 
  29  -3  -2   -0.15    2.00 
  29  -3  -2   -0.43    2.74 
  29   3  -2    2.60    2.07 
  29   3  -2    1.36    1.56 
  29   3  -2    2.63    2.12 
 -29   3   2    1.76    2.44 
  29   3  -2    1.70    1.81 
 -29   3   2    1.42    2.26 
  27  -3  -2    2.98    1.82 
  27  -3  -2    5.53    1.63 
  27  -3  -2    6.55    1.97 
 -27  -3   2    4.69    1.69 
  27  -3  -2    8.69    1.62 
  27  -3  -2    4.13    2.02 
 -27  -3   2    3.39    1.81 
 -27  -3   2    4.31    1.86 
  27   3  -2    1.09    1.87 
 -27   3   2    2.79    2.11 
  27   3  -2    4.77    1.82 
  27   3  -2    5.77    1.98 
 -27   3   2    3.91    2.02 
  27   3  -2    5.62    1.61 
  27   3  -2    4.09    1.88 
 -27   3   2    4.78    1.98 
 -27   3   2    2.12    1.46 
  27   3  -2    4.89    1.57 
 -25  -3   2    7.02    1.84 
  25  -3  -2   10.12    2.15 
 -25  -3   2    8.39    1.52 
 -25  -3   2    9.24    1.70 
  25  -3  -2    9.86    1.70 
  25  -3  -2   10.99    1.45 
  25  -3  -2   11.69    2.08 
  25  -3  -2    9.17    1.66 
  25  -3  -2   12.59    1.86 
 -25   3   2    8.65    1.42 
  25   3  -2    8.73    1.46 
  25   3  -2   10.17    1.78 
  25   3  -2    6.43    1.51 
  25   3  -2    5.77    1.70 
 -25   3   2   12.11    2.16 
 -25   3   2    8.79    1.83 
  25   3  -2    8.17    1.71 
  23  -3  -2    1.76    1.39 
  23  -3  -2    2.00    1.41 
  23  -3  -2    1.45    1.24 
  23  -3  -2    3.42    1.50 
  23  -3  -2    3.44    1.06 
 -23  -3   2   -0.33    1.25 
 -23  -3   2    3.81    1.46 
  23  -3  -2    4.04    1.27 
 -23  -3   2    1.92    1.14 
  23  -3  -2    2.95    1.72 
  23   3  -2    0.83    1.56 
  23   3  -2    2.06    1.03 
  23   3  -2    2.51    1.13 
 -23   3   2    3.89    1.61 
 -23   3   2    5.51    1.39 
 -23   3   2    1.59    1.45 
  23   3  -2    2.15    1.38 
  23   3  -2    1.75    1.24 
 -23   3   2    3.54    1.10 
  23   3  -2    1.72    1.29 
  21  -3  -2    1.80    1.31 
  21  -3  -2   -0.19    0.82 
  21  -3  -2    0.53    1.13 
 -21  -3   2    0.40    1.32 
 -21  -3   2    0.88    0.94 
  21  -3  -2   -0.27    1.21 
  21  -3  -2    1.97    1.05 
  21  -3  -2   -2.65    1.13 
 -21  -3   2    1.77    1.08 
 -21  -3   2   -1.33    1.05 
  21  -3  -2    0.46    1.10 
  21   3  -2   -0.24    0.97 
 -21   3   2    0.63    1.40 
  21   3  -2    2.06    0.91 
  21   3  -2    1.61    1.16 
  21   3  -2    0.37    1.01 
  21   3  -2    0.52    1.17 
 -21   3   2    1.32    1.15 
 -21   3   2    0.84    1.09 
  21   3  -2    0.73    0.86 
 -21   3   2    1.66    0.92 
 -19  -3   2    2.97    0.94 
  19  -3  -2    1.79    0.94 
  19  -3  -2    2.89    0.90 
  19  -3  -2    3.19    1.10 
 -19  -3   2    3.03    0.79 
  19  -3  -2    2.93    1.06 
  19  -3  -2    2.69    1.07 
  19  -3  -2    2.40    1.03 
 -19  -3   2    3.62    1.34 
  19  -3  -2    2.58    0.72 
 -19  -3   2    1.16    1.00 
  19   3  -2    1.97    0.86 
 -19   3   2    2.57    1.14 
  19   3  -2    1.89    0.84 
 -19   3   2    2.04    1.38 
 -19   3   2    2.84    0.86 
  19   3  -2    2.16    0.95 
  19   3  -2    1.98    0.80 
  19   3  -2    2.63    0.82 
 -19   3   2    1.35    0.96 
 -17  -3   2    6.67    0.87 
 -17  -3   2    6.96    1.16 
 -17  -3   2    5.88    0.93 
  17  -3  -2    6.06    1.13 
  17  -3  -2    6.92    1.26 
  17  -3  -2    6.86    1.16 
 -17  -3   2    7.19    1.21 
  17  -3  -2    8.71    1.01 
 -17  -3   2    5.72    0.99 
  17  -3  -2    6.82    1.08 
  17  -3  -2    8.20    1.08 
  17  -3  -2    6.63    1.07 
 -17   3   2    8.16    0.99 
  17   3  -2    5.91    0.85 
  17   3  -2    6.21    0.91 
 -17   3   2    6.39    1.25 
  17   3  -2    7.14    1.10 
  17   3  -2    6.38    1.00 
 -17   3   2    4.84    0.88 
 -17   3   2    6.92    1.16 
  17   3  -2    7.46    0.92 
  15  -3  -2    9.98    1.23 
 -15  -3   2    7.89    0.94 
 -15  -3   2    9.07    0.99 
  15  -3  -2   10.31    1.33 
 -15  -3   2   10.89    1.36 
  15  -3  -2   10.51    1.23 
  15  -3  -2    9.88    1.27 
  15  -3  -2    9.62    1.16 
 -15  -3   2    7.64    1.05 
  15  -3  -2   10.56    1.22 
  15  -3  -2   11.17    0.88 
  15   3  -2    9.12    0.91 
  15   3  -2   10.04    1.11 
 -15   3   2    8.01    1.02 
 -15   3   2    9.14    1.14 
  15   3  -2    9.67    1.21 
 -15   3   2   10.89    1.47 
 -15   3   2    8.83    1.00 
  15   3  -2    7.88    1.03 
  13  -3  -2   70.64    2.10 
  13  -3  -2   65.87    2.34 
 -13  -3   2   70.75    2.42 
  13  -3  -2   66.32    2.28 
  13  -3  -2   67.77    2.40 
  13  -3  -2   67.64    2.25 
 -13   3   2   69.00    2.56 
 -13   3   2   71.22    2.37 
 -13   3   2   71.87    2.27 
 -13   3   2   67.44    2.08 
  13   3  -2   71.07    1.80 
  13   3  -2   68.58    2.14 
  13   3  -2   69.37    2.46 
  13   3  -2   69.02    1.82 
  11  -3  -2   86.86    2.21 
  11  -3  -2   83.33    2.45 
  11  -3  -2   89.77    2.46 
  11  -3  -2   84.25    2.61 
 -11  -3   2   85.34    2.58 
  11  -3  -2   85.40    2.61 
 -11   3   2   87.31    2.72 
 -11   3   2   87.07    2.35 
 -11   3   2   86.89    2.42 
 -11   3   2   84.40    2.46 
  11   3  -2   86.11    2.37 
  11   3  -2   85.29    2.60 
   9  -3  -2   53.83    1.43 
   9  -3  -2   54.36    1.54 
   9  -3  -2   54.12    1.82 
   9  -3  -2   53.15    1.90 
  -9  -3   2   52.29    1.91 
   9  -3  -2   53.12    1.80 
   9  -3  -2   53.10    2.00 
  -9   3   2   55.26    1.81 
  -9   3   2   51.50    1.87 
   9   3  -2   56.08    1.98 
  -9   3   2   52.53    1.95 
  -9   3   2   52.70    1.82 
   9   3  -2   51.43    1.89 
  -9   3   2   52.12    1.55 
   9   3  -2   53.51    1.73 
  -9   3   2   53.41    1.72 
   7  -3  -2   21.80    1.12 
   7  -3  -2   21.44    0.87 
   7  -3  -2   23.32    1.22 
  -7  -3   2   23.01    1.21 
   7  -3  -2   21.86    1.12 
   7  -3  -2   22.90    1.32 
   7  -3  -2   21.88    0.94 
   7   3  -2   20.65    1.07 
  -7   3   2   21.25    1.22 
  -7   3   2   21.51    1.28 
  -7   3   2   21.05    1.16 
  -7   3   2   21.22    1.07 
  -7   3   2   22.75    1.32 
   7   3  -2   20.72    1.20 
   7   3  -2   22.59    1.33 
   5  -3  -2   15.15    0.91 
   5  -3  -2   14.42    0.85 
   5  -3  -2   16.32    0.94 
  -5  -3   2   16.07    1.00 
   5  -3  -2   14.84    0.99 
   5  -3  -2   16.65    1.21 
  -5   3   2   15.73    1.17 
  -5   3   2   14.19    0.88 
   5   3  -2   16.45    1.20 
   5   3  -2   15.21    0.94 
   5   3  -2   16.16    0.88 
  -5   3   2   15.35    0.65 
  -5   3   2   16.33    0.97 
   5   3  -2   17.18    1.04 
  -5   3   2   15.67    1.10 
   5   3  -2   14.53    0.94 
  -3  -3   2   13.21    1.04 
   3  -3  -2   14.62    1.09 
   3  -3  -2   12.87    0.94 
   3  -3  -2   11.72    0.80 
   3  -3  -2   14.10    0.84 
  -3  -3   2   13.97    0.89 
   3  -3  -2   13.68    0.87 
  -3   3   2   13.54    1.13 
   3   3  -2   14.33    0.75 
   3   3  -2   11.41    1.08 
   3   3  -2   12.62    0.87 
  -3   3   2   12.61    0.81 
   3   3  -2   12.59    0.87 
  -3   3   2   12.11    0.66 
  -3   3   2   13.43    0.87 
  -3   3   2   13.88    0.95 
  -1  -3   2    0.63    0.59 
  -1  -3   2    1.58    0.43 
   1  -3  -2    0.49    0.42 
   1  -3  -2    1.29    0.48 
   1  -3  -2    1.10    0.43 
   1  -3  -2    1.64    0.60 
  -1  -3   2    1.33    0.49 
   1  -3  -2    1.18    0.39 
   1   3  -2    0.62    0.58 
  -1   3   2    0.83    0.37 
   1   3  -2    0.85    0.43 
  -1   3   2    0.91    0.40 
  -1   3   2    1.31    0.42 
   1   3  -2    0.76    0.42 
   1   3  -2    1.14    0.35 
  -1   3   2    0.67    0.64 
  -1   3   2    1.18    0.43 
  -1  -3  -2  142.58    3.30 
  -1  -3  -2  142.11    2.95 
  -1  -3  -2  138.40    2.82 
  -1  -3  -2  141.37    2.86 
   1  -3   2  140.43    2.96 
   1  -3   2  144.74    3.37 
  -1   3  -2  147.65    2.80 
  -1   3  -2  145.22    2.92 
  -1   3  -2  143.67    3.25 
   1   3   2  141.46    2.90 
  -1   3  -2  146.65    2.92 
   1   3   2  137.72    3.36 
   1   3   2  138.98    2.78 
  -1   3  -2  145.37    2.65 
   1   3   2  139.08    2.85 
   1   3   2  146.78    3.26 
  -3  -3  -2  162.72    3.23 
  -3  -3  -2  164.69    3.72 
   3  -3   2  160.35    3.14 
   3  -3   2  162.00    3.04 
  -3  -3  -2  159.36    3.10 
   3  -3   2  154.40    3.26 
  -3  -3  -2  157.81    3.09 
   3  -3   2  158.93    3.10 
   3  -3   2  155.23    3.63 
   3   3   2  160.07    3.61 
  -3   3  -2  160.96    3.06 
   3   3   2  156.62    3.11 
   3   3   2  157.22    3.03 
   3   3   2  158.15    3.15 
  -3   3  -2  157.87    3.21 
  -3   3  -2  158.84    3.49 
  -3   3  -2  156.44    3.02 
  -3   3  -2  158.71    3.23 
  -3   3  -2  159.78    3.17 
  -3   3  -2  159.23    3.06 
   3   3   2  156.39    3.65 
   5  -3   2  127.33    2.77 
   5  -3   2  125.99    2.87 
   5  -3   2  126.60    2.82 
  -5  -3  -2  124.71    2.65 
   5  -3   2  124.22    3.15 
  -5  -3  -2  130.88    2.79 
   5  -3   2  128.60    2.73 
  -5  -3  -2  125.20    3.23 
  -5  -3  -2  122.96    2.65 
   5   3   2  128.15    2.71 
   5   3   2  122.25    2.64 
  -5   3  -2  130.73    2.65 
   5   3   2  128.00    3.22 
  -5   3  -2  126.69    2.91 
  -5   3  -2  129.33    2.74 
  -5   3  -2  126.29    2.85 
   5   3   2  121.39    3.12 
  -5   3  -2  127.48    2.75 
  -7  -3  -2   33.81    1.68 
  -7  -3  -2   34.41    1.32 
  -7  -3  -2   36.84    1.39 
   7  -3   2   34.77    1.37 
  -7  -3  -2   36.01    1.32 
   7  -3   2   34.05    1.52 
   7  -3   2   36.05    1.40 
   7  -3   2   36.61    1.66 
   7  -3   2   34.35    1.45 
   7   3   2   35.86    1.65 
  -7   3  -2   33.96    1.17 
   7   3   2   37.02    1.37 
   7   3   2   34.27    1.29 
  -7   3  -2   35.36    1.46 
   7   3   2   36.91    1.19 
  -7   3  -2   36.62    1.36 
  -7   3  -2   37.05    1.43 
  -7   3  -2   35.03    1.57 
   9  -3   2    4.31    0.83 
   9  -3   2    4.05    0.85 
  -9  -3  -2    3.57    0.81 
   9  -3   2    3.36    0.68 
  -9  -3  -2    4.94    0.71 
   9  -3   2    4.36    0.83 
  -9  -3  -2    4.06    0.74 
   9  -3   2    4.31    0.73 
  -9  -3  -2    4.10    0.68 
  -9  -3  -2    4.59    0.70 
  -9   3  -2    3.66    0.65 
  -9   3  -2    4.08    0.89 
  -9   3  -2    4.91    0.81 
  -9   3  -2    4.83    0.57 
  -9   3  -2    4.30    0.76 
   9   3   2    3.79    0.65 
   9   3   2    5.35    0.72 
   9   3   2    4.44    0.80 
   9   3   2    3.49    0.82 
 -11  -3  -2   12.47    1.12 
  11  -3   2   13.08    1.17 
  11  -3   2   12.98    1.08 
 -11  -3  -2   13.85    1.40 
  11  -3   2   12.56    1.28 
  11  -3   2   15.96    1.38 
 -11  -3  -2   12.80    1.15 
 -11  -3  -2   14.35    1.22 
  11  -3   2   11.39    1.35 
  11  -3   2   13.96    1.39 
 -11  -3  -2   15.65    1.21 
 -11   3  -2   13.80    1.49 
  11   3   2   13.57    1.38 
  11   3   2   16.79    1.14 
 -11   3  -2   14.73    1.27 
 -11   3  -2   14.42    0.93 
 -11   3  -2   14.95    1.31 
  11   3   2   15.40    1.17 
  11   3   2   14.36    1.07 
  11   3   2   14.62    1.31 
 -11   3  -2   14.67    1.14 
  13  -3   2    7.62    1.19 
 -13  -3  -2    6.60    1.03 
 -13  -3  -2    7.57    0.97 
  13  -3   2    7.46    0.93 
  13  -3   2    8.12    1.21 
 -13  -3  -2    6.18    1.05 
 -13  -3  -2    6.24    0.93 
  13  -3   2    7.13    0.98 
  13  -3   2    7.82    1.10 
 -13  -3  -2    7.16    0.94 
  13  -3   2    7.03    1.10 
  13   3   2    7.94    1.10 
  13   3   2    6.57    0.92 
 -13   3  -2    7.51    1.09 
  13   3   2    6.80    0.88 
 -13   3  -2    7.55    0.92 
  13   3   2    8.12    1.20 
 -13   3  -2    6.74    1.11 
  13   3   2    9.09    1.05 
 -13   3  -2    6.01    0.92 
 -13   3  -2    8.25    1.22 
  15  -3   2   49.32    1.62 
  15  -3   2   49.99    2.32 
 -15  -3  -2   49.90    2.22 
  15  -3   2   48.39    2.16 
  15  -3   2   50.58    2.46 
  15  -3   2   50.74    2.31 
  15  -3   2   48.14    1.97 
 -15  -3  -2   47.91    2.10 
 -15  -3  -2   48.97    2.40 
 -15  -3  -2   51.36    2.14 
  15  -3   2   48.55    2.28 
 -15  -3  -2   49.48    2.14 
 -15   3  -2   46.55    2.50 
  15   3   2   47.58    2.08 
 -15   3  -2   51.29    2.29 
 -15   3  -2   46.02    2.06 
 -15   3  -2   53.23    2.30 
  15   3   2   45.71    1.99 
 -15   3  -2   50.77    1.76 
  15   3   2   47.08    2.13 
  15   3   2   47.02    2.32 
  15   3   2   50.84    2.02 
  17  -3   2   40.64    2.32 
  17  -3   2   42.32    2.41 
 -17  -3  -2   45.01    2.37 
 -17  -3  -2   44.35    2.22 
 -17  -3  -2   43.02    2.50 
 -17  -3  -2   44.36    2.17 
  17  -3   2   40.74    2.23 
  17  -3   2   43.45    2.11 
 -17  -3  -2   43.86    2.23 
  17  -3   2   44.80    2.67 
 -17   3  -2   43.72    2.35 
 -17   3  -2   45.76    2.68 
 -17   3  -2   47.29    2.44 
 -17   3  -2   42.45    1.73 
  17   3   2   40.71    2.04 
  17   3   2   42.18    2.16 
  17   3   2   44.54    2.48 
  17   3   2   45.54    2.13 
  17   3   2   41.52    2.18 
 -17   3  -2   41.34    2.10 
 -19  -3  -2   15.28    1.86 
  19  -3   2   19.00    1.89 
  19  -3   2   16.14    1.79 
  19  -3   2   11.96    1.74 
 -19  -3  -2   17.74    1.99 
 -19  -3  -2   15.97    1.74 
  19  -3   2   20.34    2.14 
  19  -3   2   15.62    1.89 
 -19  -3  -2   15.74    1.98 
 -19  -3  -2   14.99    1.78 
  19   3   2   15.21    1.98 
  19   3   2   14.62    1.70 
 -19   3  -2   17.36    2.08 
  19   3   2   14.11    1.76 
  19   3   2   13.84    1.57 
  19   3   2   16.80    1.82 
 -19   3  -2   12.63    1.45 
 -19   3  -2   19.23    2.22 
 -19   3  -2   20.46    2.45 
  21  -3   2    4.17    1.22 
 -21  -3  -2    3.98    1.49 
  21  -3   2    7.14    1.79 
 -21  -3  -2    4.14    1.55 
  21  -3   2    6.12    1.35 
  21  -3   2    1.79    1.35 
 -21  -3  -2    4.73    1.45 
  21  -3   2    4.53    1.67 
 -21  -3  -2    4.34    1.61 
  21   3   2    3.18    1.48 
  21   3   2    4.37    1.28 
 -21   3  -2    2.54    1.18 
  21   3   2    3.00    1.38 
  21   3   2    5.63    1.35 
  21   3   2    4.05    1.47 
 -21   3  -2    4.80    1.77 
 -21   3  -2    2.63    1.59 
 -21   3  -2    1.93    1.45 
  23  -3   2    7.63    1.52 
 -23  -3  -2    6.14    1.81 
  23  -3   2    5.72    2.02 
  23  -3   2    6.81    2.15 
  23  -3   2    2.47    1.78 
 -23  -3  -2    8.25    1.93 
 -23  -3  -2    7.60    1.86 
  23  -3   2    6.74    1.67 
 -23  -3  -2    5.09    1.70 
  23  -3   2    5.95    1.65 
 -23  -3  -2    5.39    1.77 
 -23   3  -2    7.77    2.45 
  23   3   2    7.52    1.87 
  23   3   2    5.95    1.52 
 -23   3  -2    6.78    1.88 
 -23   3  -2    6.45    2.01 
  23   3   2    8.10    1.58 
 -23   3  -2    8.19    1.59 
 -23   3  -2    3.16    1.63 
  23   3   2    6.88    1.86 
  25  -3   2   -0.25    1.55 
  25  -3   2   -1.16    1.71 
  25  -3   2    1.56    1.85 
 -25  -3  -2   -3.01    1.93 
 -25  -3  -2    3.06    1.96 
 -25  -3  -2    2.24    1.80 
 -25  -3  -2   -1.30    1.86 
  25   3   2    1.44    2.04 
 -25   3  -2    1.62    2.26 
  25   3   2    1.50    1.62 
 -25   3  -2    1.70    1.98 
  25   3   2   -0.71    2.01 
  25   3   2    1.60    1.55 
 -25   3  -2    1.67    1.78 
 -27  -3  -2    0.85    2.31 
  27  -3   2   -0.34    2.01 
 -27  -3  -2    2.31    2.48 
 -27  -3  -2   -0.97    2.43 
  27  -3   2   -2.74    2.10 
 -27  -3  -2    0.02    2.38 
  27   3   2    0.84    1.98 
  27   3   2   -2.13    1.69 
 -27   3  -2   -1.13    2.01 
 -27   3  -2   -1.17    2.22 
 -27   3  -2   -3.66    2.35 
  29  -3   2    2.36    2.57 
  29  -3   2   -2.78    2.45 
 -29  -3  -2   -1.25    2.86 
 -29  -3  -2    0.64    2.88 
  29  -3   2    4.24    2.45 
 -29   3  -2    0.78    2.82 
  29   3   2   -1.42    2.31 
  29   3   2   -1.18    2.12 
 -29   3  -2   -0.38    3.23 
 -31  -3  -2   -5.82    3.52 
 -31  -3  -2    0.09    3.37 
  31  -3   2   -1.19    2.93 
  31  -3   2   -4.42    2.98 
  31   3   2    1.30    2.44 
  31   3   2    1.79    2.85 
 -31   3  -2   -6.63    3.74 
 -31   3  -2   -3.16    3.37 
  32  -4  -2   -3.02    2.82 
  32  -4  -2    3.76    2.96 
  32  -4  -2    2.12    3.17 
 -32  -4   2    0.51    3.18 
 -32   4   2   -3.22    3.60 
 -32   4   2    3.79    3.43 
  32   4  -2   -0.51    3.03 
  32   4  -2   -0.28    2.34 
  30  -4  -2    1.23    2.07 
 -30  -4   2    5.84    2.78 
  30  -4  -2    5.46    2.82 
 -30  -4   2    6.36    2.63 
  30  -4  -2    1.77    2.57 
  30  -4  -2    2.70    2.41 
  30   4  -2    2.65    2.76 
 -30   4   2    4.44    2.83 
  30   4  -2    1.34    2.27 
 -30   4   2    4.04    3.14 
  30   4  -2    2.35    2.09 
  28  -4  -2    5.05    3.01 
 -28  -4   2    2.90    2.25 
 -28  -4   2    4.96    2.31 
  28  -4  -2    4.22    2.33 
  28  -4  -2    4.69    1.77 
  28  -4  -2    2.45    2.23 
 -28  -4   2   -0.52    1.92 
  28  -4  -2    4.27    2.16 
 -28   4   2    7.25    2.76 
  28   4  -2    2.56    1.90 
  28   4  -2    1.41    1.77 
 -28   4   2    2.72    2.29 
  28   4  -2    4.36    2.17 
 -26  -4   2    9.12    1.84 
 -26  -4   2   11.74    2.13 
  26  -4  -2   10.86    2.69 
  26  -4  -2    5.62    2.24 
  26  -4  -2   10.97    2.09 
 -26  -4   2   11.23    2.02 
  26  -4  -2   11.24    2.05 
  26  -4  -2   13.48    1.61 
  26  -4  -2    8.87    2.19 
  26   4  -2   10.28    1.76 
 -26   4   2   10.88    2.67 
 -26   4   2   10.39    1.76 
  26   4  -2    9.31    1.85 
 -26   4   2   12.53    2.37 
  26   4  -2    9.79    2.07 
  26   4  -2    9.84    2.13 
  24  -4  -2    7.62    1.90 
  24  -4  -2    4.35    2.09 
 -24  -4   2    6.60    1.75 
  24  -4  -2    5.33    1.69 
  24  -4  -2    3.49    1.84 
  24  -4  -2    2.84    1.62 
 -24  -4   2    3.00    1.48 
 -24  -4   2    7.83    1.69 
  24   4  -2    4.11    1.83 
  24   4  -2    4.28    1.62 
 -24   4   2    5.87    2.26 
  24   4  -2    5.51    1.45 
  24   4  -2    4.71    2.04 
  24   4  -2    6.98    1.38 
 -24   4   2    6.08    1.53 
 -24   4   2    7.22    1.88 
  22  -4  -2    5.82    1.95 
  22  -4  -2    4.53    1.41 
  22  -4  -2    4.44    1.60 
  22  -4  -2    2.22    1.62 
 -22  -4   2    5.70    1.48 
 -22  -4   2    7.28    1.51 
  22  -4  -2    3.61    1.59 
 -22  -4   2    4.17    1.21 
  22   4  -2    3.46    1.40 
  22   4  -2    4.94    1.12 
 -22   4   2    5.04    2.01 
  22   4  -2    6.00    1.56 
  22   4  -2    6.34    1.38 
 -22   4   2    6.13    1.68 
 -22   4   2    5.88    1.32 
  20  -4  -2    5.30    1.40 
 -20  -4   2    7.15    1.09 
  20  -4  -2    8.86    1.65 
  20  -4  -2    5.05    1.67 
  20  -4  -2    5.73    1.37 
 -20  -4   2    6.70    1.24 
  20   4  -2    6.68    1.40 
  20   4  -2    5.18    1.04 
 -20   4   2    8.74    1.56 
 -20   4   2    7.34    1.79 
  20   4  -2    7.70    1.60 
  20   4  -2    6.24    1.22 
 -20   4   2    7.34    1.28 
  18  -4  -2    8.11    1.28 
  18  -4  -2   10.15    1.57 
  18  -4  -2    9.19    1.46 
  18  -4  -2    9.15    1.35 
 -18  -4   2   11.90    1.75 
 -18   4   2    9.08    1.70 
  18   4  -2   11.77    1.46 
  18   4  -2    9.45    1.22 
 -18   4   2   10.55    1.30 
  18   4  -2   10.93    1.21 
 -18   4   2    9.69    1.66 
  16  -4  -2   11.96    1.48 
  16  -4  -2   13.52    1.67 
  16  -4  -2   12.48    1.56 
  16  -4  -2   12.63    1.65 
 -16  -4   2   10.56    1.41 
  16  -4  -2   10.22    1.25 
 -16   4   2   12.13    1.50 
 -16   4   2   12.63    1.54 
 -16   4   2   14.16    1.74 
  16   4  -2   12.91    1.47 
  16   4  -2    9.32    1.42 
 -16   4   2   11.14    1.26 
  16   4  -2   12.03    1.09 
  14  -4  -2    5.42    1.01 
  14  -4  -2    6.45    1.09 
  14  -4  -2    6.40    1.13 
 -14  -4   2    4.91    1.15 
  14  -4  -2    5.90    1.18 
  14  -4  -2    4.53    1.19 
  14   4  -2    5.34    1.00 
  14   4  -2    6.51    1.18 
  14   4  -2    5.53    1.43 
 -14   4   2    5.75    1.25 
 -14   4   2    5.01    0.97 
 -14   4   2    5.89    1.06 
 -14   4   2    8.04    1.26 
 -12  -4   2   32.82    1.88 
  12  -4  -2   34.03    1.80 
  12  -4  -2   31.82    2.10 
  12  -4  -2   28.09    1.57 
  12  -4  -2   29.02    1.70 
  12  -4  -2   32.25    1.93 
  12   4  -2   32.88    1.71 
 -12   4   2   27.67    1.96 
 -12   4   2   32.74    1.61 
  12   4  -2   33.96    2.11 
 -12   4   2   29.81    1.86 
 -12   4   2   32.10    1.64 
  12   4  -2   28.18    1.83 
  10  -4  -2    8.71    1.06 
  10  -4  -2    8.56    1.22 
 -10  -4   2    7.09    0.98 
  10  -4  -2   10.72    1.26 
  10  -4  -2    8.65    1.13 
  10  -4  -2    9.40    0.90 
  10  -4  -2    8.33    0.90 
 -10   4   2    9.72    1.05 
  10   4  -2   10.28    1.31 
 -10   4   2    9.92    1.29 
 -10   4   2    9.59    1.27 
 -10   4   2    8.45    1.28 
 -10   4   2   10.16    1.08 
  10   4  -2    8.49    1.10 
  10   4  -2    9.04    1.06 
 -10   4   2    8.25    1.08 
   8  -4  -2    3.67    1.06 
   8  -4  -2    4.15    0.78 
  -8  -4   2    3.14    0.82 
   8  -4  -2    4.22    0.65 
   8  -4  -2    3.61    0.78 
   8  -4  -2    4.20    0.76 
  -8   4   2    3.55    1.05 
  -8   4   2    6.17    0.99 
  -8   4   2    4.36    0.88 
  -8   4   2    4.01    0.71 
   8   4  -2    4.13    1.07 
   8   4  -2    4.65    0.85 
   8   4  -2    5.25    0.95 
  -8   4   2    6.06    0.92 
  -6  -4   2    3.28    0.76 
   6  -4  -2    3.29    0.69 
   6  -4  -2    4.04    0.90 
   6  -4  -2    3.63    0.65 
   6  -4  -2    1.88    0.69 
   6  -4  -2    2.67    0.71 
   6   4  -2    2.99    0.76 
   6   4  -2    3.58    0.73 
   6   4  -2    2.08    0.96 
  -6   4   2    2.69    0.70 
  -6   4   2    4.18    1.01 
   6   4  -2    3.25    0.65 
  -6   4   2    2.59    0.82 
  -6   4   2    2.72    0.63 
   6   4  -2    3.81    0.88 
   4  -4  -2   14.56    1.08 
   4  -4  -2   15.15    1.13 
   4  -4  -2   13.71    1.44 
   4  -4  -2   13.01    1.09 
  -4  -4   2   14.36    1.18 
  -4  -4   2   15.94    1.47 
   4  -4  -2   12.44    1.02 
  -4   4   2   14.33    0.83 
  -4   4   2   14.51    1.48 
  -4   4   2   13.03    1.03 
  -4   4   2   13.87    1.22 
   4   4  -2   13.17    1.48 
   4   4  -2   14.32    1.22 
   4   4  -2   14.19    1.12 
   4   4  -2   15.20    0.99 
  -4   4   2   14.02    1.13 
   2  -4  -2    3.38    0.70 
   2  -4  -2    3.44    0.69 
  -2  -4   2    3.27    0.88 
  -2  -4   2    3.83    0.70 
   2  -4  -2    3.42    0.64 
   2  -4  -2    4.51    0.98 
   2  -4  -2    3.86    0.69 
  -2   4   2    3.21    0.55 
  -2   4   2    2.97    0.69 
  -2   4   2    2.82    0.97 
   2   4  -2    4.04    1.00 
   2   4  -2    2.75    0.69 
  -2   4   2    3.71    0.59 
   2   4  -2    3.41    0.55 
   2   4  -2    2.77    0.67 
   0  -4  -2   12.21    1.41 
   0  -4   2   11.25    1.43 
   0  -4   2   11.34    1.09 
   0  -4   2   11.43    0.97 
   0  -4  -2   12.54    1.16 
   0  -4  -2   14.57    1.01 
   0  -4  -2   11.35    0.88 
   0   4  -2   12.29    0.78 
   0   4  -2   11.25    1.02 
   0   4   2   12.29    1.05 
   0   4  -2   11.89    1.50 
   0   4  -2   12.90    1.01 
   0   4   2   14.55    1.52 
   0   4   2   11.83    0.94 
   2  -4   2   29.75    1.77 
  -2  -4  -2   21.89    1.21 
   2  -4   2   28.53    1.43 
  -2  -4  -2   27.44    1.10 
  -2  -4  -2   28.31    1.61 
   2   4   2   23.92    1.76 
  -2   4  -2   22.81    1.60 
  -2   4  -2   26.65    1.23 
   2   4   2   26.99    1.23 
   2   4   2   27.49    1.21 
   2   4   2   27.74    1.54 
  -2   4  -2   29.68    1.36 
  -2   4  -2   27.03    1.20 
   4  -4   2    6.87    0.97 
   4  -4   2    7.23    1.08 
   4  -4   2    6.49    0.76 
   4  -4   2    6.19    0.72 
  -4  -4  -2    5.49    0.96 
   4  -4   2    5.43    0.71 
  -4   4  -2    5.65    0.74 
  -4   4  -2    6.79    0.71 
   4   4   2    8.73    0.89 
  -4   4  -2    5.78    1.05 
   4   4   2    5.54    0.95 
   4   4   2    3.95    0.63 
  -4   4  -2    5.22    0.65 
   4   4   2    6.47    1.14 
  -4   4  -2    5.44    0.78 
  -4   4  -2    7.06    0.92 
  -4   4  -2    7.66    0.90 
  -6  -4  -2    2.02    0.69 
   6  -4   2    1.85    0.93 
  -6  -4  -2    1.21    0.73 
   6  -4   2    2.01    0.86 
   6  -4   2    2.99    0.64 
   6  -4   2    1.74    0.65 
  -6  -4  -2    1.64    0.57 
   6  -4   2    1.96    0.67 
  -6   4  -2    1.29    0.64 
   6   4   2    3.68    1.10 
   6   4   2    2.74    0.63 
  -6   4  -2    1.25    0.81 
  -6   4  -2    2.91    0.64 
   6   4   2    2.02    0.86 
   6   4   2    2.14    0.61 
  -6   4  -2    2.44    0.77 
  -6   4  -2    2.79    0.59 
  -8  -4  -2    3.59    0.73 
  -8  -4  -2    3.36    0.76 
   8  -4   2    3.95    0.83 
   8  -4   2    5.73    1.12 
  -8  -4  -2    2.65    0.73 
  -8  -4  -2    2.37    0.88 
   8  -4   2    4.05    0.97 
   8  -4   2    4.56    0.90 
   8  -4   2    4.47    0.82 
  -8   4  -2    5.21    1.00 
  -8   4  -2    3.98    0.87 
   8   4   2    4.92    0.78 
   8   4   2    4.97    1.14 
  -8   4  -2    3.53    0.66 
   8   4   2    3.28    0.94 
  -8   4  -2    5.00    0.89 
  -8   4  -2    3.69    0.74 
   8   4   2    5.63    1.12 
  10  -4   2   25.37    1.90 
  10  -4   2   24.49    1.63 
  10  -4   2   25.92    1.73 
  10  -4   2   26.46    1.91 
 -10  -4  -2   22.99    1.85 
 -10  -4  -2   26.03    1.46 
 -10  -4  -2   24.04    1.51 
 -10  -4  -2   24.62    1.47 
 -10  -4  -2   27.03    1.58 
  10  -4   2   26.12    1.58 
 -10   4  -2   26.10    1.66 
 -10   4  -2   21.74    1.83 
 -10   4  -2   24.10    1.28 
 -10   4  -2   28.05    1.49 
  10   4   2   25.45    1.87 
  10   4   2   24.60    2.05 
  10   4   2   23.47    1.79 
  10   4   2   25.17    1.48 
 -10   4  -2   25.48    1.67 
  12  -4   2    1.94    0.96 
  12  -4   2    2.43    1.06 
  12  -4   2    1.21    0.85 
 -12  -4  -2    1.17    0.84 
 -12  -4  -2    1.92    0.90 
  12  -4   2    1.83    1.08 
  12  -4   2    2.73    1.14 
 -12  -4  -2    1.79    0.76 
 -12  -4  -2    0.91    0.88 
 -12  -4  -2    1.62    0.99 
 -12   4  -2    0.74    0.78 
 -12   4  -2    1.44    0.73 
  12   4   2    1.47    0.76 
 -12   4  -2    1.71    0.94 
 -12   4  -2    1.43    0.97 
  12   4   2    0.57    0.87 
 -12   4  -2    1.33    1.12 
  12   4   2    0.42    0.95 
  12   4   2    0.82    0.93 
  12   4   2    2.27    0.72 
 -14  -4  -2   32.12    2.35 
  14  -4   2   30.60    2.09 
  14  -4   2   32.51    2.38 
 -14  -4  -2   31.46    2.01 
 -14  -4  -2   33.85    1.95 
 -14  -4  -2   33.83    1.92 
 -14  -4  -2   31.95    1.84 
  14  -4   2   33.08    2.08 
  14  -4   2   35.30    2.31 
  14  -4   2   32.55    2.31 
  14   4   2   32.30    1.72 
 -14   4  -2   32.90    1.88 
 -14   4  -2   29.55    1.53 
 -14   4  -2   30.65    2.12 
  14   4   2   35.10    1.90 
  14   4   2   31.93    1.76 
 -14   4  -2   33.34    2.50 
  14   4   2   38.52    2.17 
  14   4   2   30.66    2.20 
 -14   4  -2   32.97    2.14 
  16  -4   2   11.59    1.79 
  16  -4   2   12.41    1.68 
 -16  -4  -2   11.12    1.48 
 -16  -4  -2    9.45    1.38 
 -16  -4  -2    9.87    1.64 
 -16  -4  -2   10.66    1.49 
  16  -4   2   12.60    1.59 
  16  -4   2    8.75    1.76 
 -16  -4  -2   10.30    1.33 
  16   4   2    9.82    1.46 
 -16   4  -2   12.62    1.56 
 -16   4  -2   10.73    1.38 
 -16   4  -2   11.35    1.58 
  16   4   2   11.58    1.40 
 -16   4  -2   11.29    1.91 
  16   4   2   12.09    1.39 
  16   4   2   12.92    1.53 
  18  -4   2   13.03    2.05 
 -18  -4  -2   14.61    1.79 
 -18  -4  -2   18.07    2.32 
  18  -4   2   14.48    1.85 
  18  -4   2   14.02    1.68 
  18  -4   2   17.20    2.02 
 -18  -4  -2   13.84    1.83 
  18  -4   2   12.26    1.91 
 -18  -4  -2   13.57    1.54 
 -18  -4  -2   14.94    1.63 
 -18   4  -2   14.43    1.78 
 -18   4  -2   17.63    1.62 
  18   4   2   13.78    1.57 
  18   4   2   14.03    1.62 
 -18   4  -2   17.91    2.28 
 -18   4  -2   12.15    2.11 
  18   4   2   17.11    1.95 
  18   4   2   16.67    1.98 
  20  -4   2    4.47    1.78 
 -20  -4  -2    1.86    1.49 
 -20  -4  -2    3.23    1.47 
  20  -4   2    2.97    1.61 
  20  -4   2    3.22    1.89 
 -20  -4  -2    0.61    1.55 
  20  -4   2    3.78    1.52 
 -20  -4  -2    3.13    1.64 
  20   4   2    2.92    1.58 
  20   4   2    1.97    1.54 
 -20   4  -2    3.53    1.16 
  20   4   2    4.04    1.43 
 -20   4  -2    4.63    1.69 
 -20   4  -2    3.14    1.64 
  20   4   2    5.09    1.37 
 -20   4  -2    0.97    1.79 
 -22  -4  -2    2.09    1.87 
  22  -4   2    3.44    2.17 
 -22  -4  -2    3.55    1.98 
  22  -4   2    8.84    2.31 
  22  -4   2    3.36    2.23 
 -22  -4  -2    2.51    1.76 
 -22  -4  -2    3.32    1.80 
 -22  -4  -2    3.58    1.80 
  22  -4   2    1.87    1.65 
  22  -4   2    2.53    2.09 
  22   4   2    3.10    1.88 
  22   4   2    4.96    1.54 
  22   4   2    4.14    1.82 
 -22   4  -2    1.97    1.41 
 -22   4  -2    4.60    1.95 
  22   4   2    3.94    1.65 
 -22   4  -2    3.67    1.91 
 -22   4  -2    4.27    2.27 
 -24  -4  -2   -1.32    2.13 
  24  -4   2    2.24    1.83 
 -24  -4  -2    1.05    2.07 
 -24  -4  -2    1.50    2.07 
  24  -4   2   -1.56    1.86 
  24  -4   2    0.14    2.86 
 -24  -4  -2   -0.77    1.99 
  24  -4   2    1.25    2.43 
  24   4   2    2.32    2.10 
  24   4   2    1.84    1.76 
 -24   4  -2    1.79    2.72 
 -24   4  -2    1.16    2.00 
 -24   4  -2    3.08    2.40 
 -24   4  -2    0.97    1.66 
  24   4   2    4.02    1.77 
  26  -4   2   19.33    3.88 
 -26  -4  -2    7.14    2.64 
  26  -4   2    6.86    2.71 
 -26  -4  -2   11.03    2.71 
  26  -4   2    9.08    2.37 
  26  -4   2   11.27    2.60 
 -26  -4  -2    3.60    2.56 
  26   4   2   10.74    2.29 
 -26   4  -2    7.13    2.60 
  26   4   2    9.76    2.21 
 -26   4  -2    8.53    3.27 
 -26   4  -2    4.36    2.22 
 -28  -4  -2    0.18    2.90 
 -28  -4  -2   -0.29    2.81 
 -28  -4  -2    2.87    3.10 
  28  -4   2    4.79    2.79 
  28  -4   2    2.45    3.04 
  28  -4   2    4.91    2.68 
  28   4   2    2.59    2.53 
  28   4   2    1.13    2.41 
 -28   4  -2   -3.41    3.04 
 -28   4  -2    1.64    3.57 
 -30  -4  -2    2.43    3.61 
  29  -5  -2    1.72    2.56 
 -29  -5   2   -0.05    2.82 
  29  -5  -2   -0.44    3.33 
 -29   5   2    1.96    3.92 
  29   5  -2    2.93    3.21 
 -29   5   2   -0.26    3.02 
  29   5  -2    0.75    2.43 
  27  -5  -2    1.49    2.30 
  27  -5  -2   -2.89    2.84 
 -27  -5   2    1.16    2.32 
 -27   5   2   -0.95    2.49 
  27   5  -2    2.37    2.76 
  27   5  -2    1.43    2.10 
 -27   5   2    2.01    3.03 
  25  -5  -2    3.59    2.88 
  25  -5  -2    3.10    2.51 
  25  -5  -2    0.87    2.02 
  25  -5  -2    0.37    2.56 
  25   5  -2   -1.70    1.94 
  25   5  -2    0.89    1.59 
  25   5  -2    2.44    2.27 
 -25   5   2    0.74    2.68 
 -25   5   2   -2.23    2.27 
  25   5  -2    2.66    1.92 
 -25   5   2    2.90    1.97 
  25   5  -2    2.17    2.41 
  23  -5  -2    2.19    2.21 
  23  -5  -2    0.23    1.72 
  23  -5  -2    1.30    2.43 
  23   5  -2    0.69    1.60 
  23   5  -2    1.16    1.31 
 -23   5   2    2.82    1.66 
  23   5  -2    0.24    1.60 
 -23   5   2    2.18    2.30 
 -23   5   2    0.09    1.99 
  23   5  -2   -0.97    1.91 
  21  -5  -2    0.60    1.63 
  21  -5  -2   -2.06    1.81 
  21  -5  -2    3.67    2.07 
  21  -5  -2    0.59    1.86 
 -21   5   2   -0.48    2.03 
 -21   5   2    1.28    1.76 
 -21   5   2   -1.59    1.46 
  21   5  -2    0.46    1.33 
  21   5  -2    1.57    1.46 
  21   5  -2    1.42    2.29 
  21   5  -2    2.76    1.78 
  19  -5  -2   -0.08    1.59 
 -19  -5   2    3.06    1.63 
  19  -5  -2    3.62    1.73 
  19  -5  -2   -1.90    1.56 
  19  -5  -2   -0.65    1.44 
 -19   5   2    0.64    1.33 
  19   5  -2   -0.98    2.20 
 -19   5   2    0.20    1.34 
 -19   5   2    0.67    1.62 
 -19   5   2   -0.47    1.76 
  19   5  -2    2.82    1.33 
  17  -5  -2   17.94    2.23 
  17  -5  -2   17.73    2.26 
  17  -5  -2   13.39    1.72 
  17  -5  -2   14.38    1.95 
 -17  -5   2   13.76    1.83 
 -17   5   2   15.01    1.94 
  17   5  -2   16.71    2.01 
 -17   5   2   15.66    1.94 
 -17   5   2   14.59    1.62 
  17   5  -2   15.86    2.34 
 -17   5   2   18.45    2.19 
  15  -5  -2   35.90    2.74 
 -15  -5   2   39.80    2.65 
  15  -5  -2   36.86    2.56 
  15  -5  -2   34.29    2.58 
  15  -5  -2   35.37    2.35 
  15  -5  -2   30.33    2.17 
  15   5  -2   37.73    3.09 
  15   5  -2   41.74    2.80 
 -15   5   2   38.03    2.13 
 -15   5   2   35.40    2.58 
 -15   5   2   32.96    2.14 
  15   5  -2   39.45    2.26 
 -15   5   2   38.40    2.85 
  13  -5  -2   67.07    3.14 
  13  -5  -2   62.66    2.91 
 -13  -5   2   66.99    2.98 
  13  -5  -2   61.38    2.70 
  13  -5  -2   62.14    2.80 
  13  -5  -2   66.77    2.52 
  13   5  -2   66.34    3.27 
 -13   5   2   66.72    2.60 
 -13   5   2   60.47    2.55 
 -13   5   2   63.93    3.14 
  13   5  -2   68.39    2.71 
 -13   5   2   68.40    2.94 
 -11  -5   2   23.66    2.03 
  11  -5  -2   22.21    2.33 
  11  -5  -2   26.23    1.96 
  11  -5  -2   22.63    1.97 
  11  -5  -2   27.93    1.94 
  11  -5  -2   24.36    1.76 
  11  -5  -2   20.77    1.42 
  11   5  -2   22.28    2.38 
 -11   5   2   22.96    1.99 
 -11   5   2   25.80    2.01 
 -11   5   2   25.07    1.72 
  11   5  -2   22.68    1.80 
  11   5  -2   21.62    2.12 
 -11   5   2   26.84    2.21 
   9  -5  -2    2.76    1.02 
   9  -5  -2    0.32    0.96 
   9  -5  -2    0.89    0.93 
   9  -5  -2    3.70    1.22 
  -9  -5   2    2.62    1.04 
   9  -5  -2    0.47    0.78 
  -9   5   2    1.86    1.34 
   9   5  -2    3.07    0.98 
   9   5  -2    0.78    1.28 
   9   5  -2    2.40    0.87 
  -9   5   2    1.15    1.12 
   9   5  -2    3.12    1.03 
  -9   5   2    2.80    1.06 
  -9   5   2    2.34    1.21 
   9   5  -2    2.17    1.13 
  -9   5   2    2.74    0.80 
  -7  -5   2   23.49    1.74 
   7  -5  -2   19.32    1.57 
   7  -5  -2   20.38    1.50 
   7  -5  -2   19.22    1.56 
   7  -5  -2   21.20    1.75 
   7  -5  -2   22.45    2.13 
  -7   5   2   21.50    1.91 
   7   5  -2   21.10    1.56 
   7   5  -2   22.30    1.72 
  -7   5   2   24.98    2.11 
  -7   5   2   21.63    1.78 
  -7   5   2   19.94    1.37 
   7   5  -2   23.13    1.58 
   7   5  -2   23.77    2.31 
   7   5  -2   20.80    1.84 
   5  -5  -2   22.14    2.05 
  -5  -5   2   19.37    1.53 
   5  -5  -2   19.33    1.49 
   5  -5  -2   17.95    1.52 
   5  -5  -2   19.08    1.54 
   5  -5  -2   18.35    1.37 
   5   5  -2   20.93    1.58 
  -5   5   2   17.44    2.12 
   5   5  -2   19.73    1.40 
   5   5  -2   17.26    1.73 
  -5   5   2   23.10    1.78 
   5   5  -2   18.21    2.22 
  -5   5   2   20.74    1.38 
  -5   5   2   19.68    1.55 
   5   5  -2   20.02    1.50 
   3  -5  -2   14.67    1.74 
   3  -5  -2   12.60    1.43 
  -3  -5   2   11.63    1.54 
  -3  -5   2   14.96    1.41 
   3  -5  -2   12.36    1.27 
   3  -5  -2   15.06    1.34 
   3  -5  -2   13.60    1.30 
  -3   5   2   12.43    1.06 
   3   5  -2   14.84    1.74 
   3   5  -2   13.46    1.17 
  -3   5   2   13.65    1.39 
  -3   5   2   11.82    1.16 
   3   5  -2   10.52    1.26 
  -3   5   2   15.00    1.70 
   1  -5  -2    7.04    1.03 
   1  -5  -2    6.42    1.47 
  -1  -5   2    7.42    1.35 
  -1  -5   2    7.76    0.98 
  -1   5   2    6.73    1.54 
   1   5  -2    8.14    1.39 
  -1   5   2    6.11    0.88 
  -1   5   2    7.55    0.90 
  -1   5   2    7.62    0.97 
   1   5  -2    6.65    1.02 
   1   5  -2    6.88    0.77 
  -1  -5  -2   69.21    2.62 
   1  -5   2   64.07    2.18 
   1  -5   2   65.86    2.30 
   1  -5   2   68.78    2.88 
   1   5   2   56.26    1.96 
   1   5   2   65.91    2.07 
  -1   5  -2   64.95    2.22 
  -1   5  -2   68.06    2.17 
  -1   5  -2   70.52    2.88 
   1   5   2   68.49    3.04 
   3  -5   2   35.85    2.35 
  -3  -5  -2   35.03    2.03 
   3  -5   2   35.37    1.91 
  -3   5  -2   33.36    1.59 
  -3   5  -2   32.96    1.74 
  -3   5  -2   34.48    1.39 
  -3   5  -2   32.65    1.66 
   3   5   2   31.19    2.40 
   3   5   2   36.79    2.03 
  -3   5  -2   34.22    2.20 
   5  -5   2   27.86    1.53 
   5  -5   2   31.84    1.59 
   5  -5   2   28.90    2.31 
   5  -5   2   31.08    1.97 
  -5  -5  -2   26.28    2.01 
   5   5   2   29.40    2.42 
   5   5   2   30.02    2.06 
  -5   5  -2   35.40    2.25 
  -5   5  -2   29.74    1.46 
  -5   5  -2   29.28    1.69 
  -5   5  -2   28.67    1.78 
  -5   5  -2   31.35    1.80 
  -7  -5  -2    2.35    1.16 
   7  -5   2    2.90    0.93 
   7  -5   2    4.17    1.19 
   7  -5   2    4.66    0.99 
   7  -5   2    4.00    0.85 
   7  -5   2    3.88    1.29 
   7   5   2    3.37    1.24 
  -7   5  -2    4.92    0.87 
  -7   5  -2    3.41    0.98 
   7   5   2    2.16    1.13 
  -7   5  -2    5.16    1.10 
  -7   5  -2    3.51    0.83 
   7   5   2    4.76    0.91 
  -7   5  -2    3.95    1.12 
   7   5   2    2.54    1.44 
   9  -5   2    1.91    1.04 
   9  -5   2    2.63    1.34 
   9  -5   2    4.46    1.03 
   9  -5   2    3.71    1.11 
  -9  -5  -2    3.27    1.16 
   9  -5   2    2.35    1.32 
  -9   5  -2    4.84    1.29 
  -9   5  -2    3.43    0.94 
   9   5   2    3.10    1.19 
   9   5   2    2.11    0.90 
   9   5   2    2.00    1.52 
  -9   5  -2    2.47    0.85 
  -9   5  -2    3.27    1.08 
  -9   5  -2    3.00    1.06 
   9   5   2    3.48    1.21 
  11  -5   2    4.88    1.25 
 -11  -5  -2    6.60    1.48 
  11  -5   2    5.03    1.30 
  11  -5   2    6.87    1.59 
  11  -5   2    7.02    1.15 
  11  -5   2    5.90    1.59 
  11   5   2    4.92    1.67 
  11   5   2    5.97    1.35 
 -11   5  -2    8.24    1.56 
 -11   5  -2    5.82    1.27 
  11   5   2    2.86    1.36 
  11   5   2    4.91    0.90 
 -11   5  -2    3.12    0.95 
  11   5   2    4.32    1.09 
 -11   5  -2    5.04    1.25 
 -11   5  -2    5.23    1.09 
  13  -5   2   35.82    2.26 
  13  -5   2   32.24    2.47 
 -13  -5  -2   26.12    2.53 
  13  -5   2   34.16    2.71 
  13  -5   2   32.83    2.42 
 -13  -5  -2   31.33    2.07 
 -13  -5  -2   33.49    2.01 
  13  -5   2   28.96    2.63 
 -13   5  -2   34.24    2.49 
  13   5   2   28.18    1.66 
 -13   5  -2   32.24    2.13 
 -13   5  -2   30.34    2.31 
 -13   5  -2   33.96    1.79 
  13   5   2   33.61    2.08 
  13   5   2   30.05    2.36 
 -13   5  -2   36.43    2.73 
 -15  -5  -2   18.57    2.10 
 -15  -5  -2   20.85    2.32 
  15  -5   2   20.61    2.31 
 -15  -5  -2   15.96    2.08 
  15  -5   2   17.74    2.07 
  15  -5   2   23.97    2.72 
  15  -5   2   25.45    2.23 
 -15  -5  -2   22.78    2.23 
  15   5   2   19.13    1.77 
  15   5   2   20.26    1.91 
 -15   5  -2   23.14    2.84 
  15   5   2   17.06    2.15 
 -15   5  -2   22.82    2.47 
 -15   5  -2   22.26    1.81 
 -15   5  -2   16.00    1.70 
 -15   5  -2   19.01    2.04 
  15   5   2   21.03    2.39 
  17  -5   2    6.96    1.91 
 -17  -5  -2    4.14    1.45 
  17  -5   2    9.46    1.72 
 -17  -5  -2    3.33    1.74 
 -17  -5  -2    8.43    1.67 
  17  -5   2    6.98    1.81 
 -17  -5  -2    6.04    1.66 
  17  -5   2    4.21    2.06 
 -17  -5  -2    3.94    1.64 
  17  -5   2    4.76    1.81 
 -17   5  -2    3.83    1.18 
  17   5   2    3.10    1.40 
  17   5   2    6.11    1.67 
 -17   5  -2    9.12    1.81 
  17   5   2    5.53    1.66 
 -17   5  -2    7.58    2.00 
  17   5   2    3.53    1.22 
 -17   5  -2    5.45    1.81 
 -17   5  -2    5.37    1.45 
  17   5   2    5.29    2.18 
 -19  -5  -2    4.61    1.94 
  19  -5   2    4.54    2.11 
 -19  -5  -2    4.33    1.64 
 -19  -5  -2    4.51    1.70 
  19  -5   2    6.86    1.77 
 -19  -5  -2    6.06    1.89 
  19  -5   2    6.39    2.33 
 -19   5  -2    7.16    2.01 
  19   5   2    3.97    1.83 
 -19   5  -2    7.81    2.33 
  19   5   2    5.11    1.47 
  19   5   2    2.79    1.66 
 -19   5  -2    6.61    2.06 
 -19   5  -2    9.13    1.52 
  19   5   2    5.28    1.80 
  21  -5   2   10.38    3.09 
 -21  -5  -2    9.24    2.54 
 -21  -5  -2   12.67    2.55 
  21  -5   2   12.14    2.82 
 -21  -5  -2    8.07    2.12 
  21  -5   2   13.83    2.12 
  21  -5   2   13.59    2.77 
 -21   5  -2   11.26    2.44 
  21   5   2    9.11    2.06 
  21   5   2    9.76    2.03 
 -21   5  -2   13.26    1.76 
 -21   5  -2   15.77    2.81 
  21   5   2   13.44    1.93 
 -21   5  -2   12.57    2.48 
 -23  -5  -2    1.40    2.61 
 -23  -5  -2    4.76    2.40 
  23  -5   2   -3.91    2.58 
  23  -5   2    5.69    2.22 
  23  -5   2    1.81    3.11 
 -23  -5  -2   -4.57    2.15 
  23   5   2    2.84    2.21 
 -23   5  -2    2.22    2.51 
 -23   5  -2    6.31    3.00 
  23   5   2    4.43    1.87 
  23   5   2    0.37    2.32 
 -23   5  -2    0.10    1.74 
 -23   5  -2    3.55    2.48 
 -25  -5  -2    2.44    2.79 
  25  -5   2    1.85    3.20 
  25  -5   2    7.49    2.49 
 -25  -5  -2    1.98    2.65 
  25   5   2    2.93    2.31 
 -25   5  -2    5.62    3.03 
  25   5   2    1.38    2.90 
 -25   5  -2   11.46    3.79 
 -25   5  -2    1.26    2.24 
  27  -5   2    2.47    2.97 
 -27  -5  -2    2.33    3.26 
 -27  -5  -2   -3.64    3.22 
  27  -5   2   -2.18    3.79 
 -27   5  -2    3.22    3.94 
 -27   5  -2    5.60    3.39 
  27   5   2   -0.42    2.58 
  26  -6  -2    8.45    3.88 
  26  -6  -2    5.92    2.94 
  26   6  -2   -2.75    3.03 
 -26   6   2   -1.68    3.26 
 -26   6   2    4.56    3.86 
  26   6  -2    8.20    2.76 
  24  -6  -2    5.34    2.49 
  24  -6  -2   10.27    3.60 
  24  -6  -2    6.27    3.36 
  24  -6  -2    8.19    3.37 
 -24   6   2    4.34    3.32 
  24   6  -2    3.01    3.00 
  24   6  -2    2.83    2.30 
 -24   6   2    0.34    2.77 
  24   6  -2    5.11    2.69 
  22  -6  -2    9.08    2.96 
  22  -6  -2    7.60    3.03 
  22  -6  -2    6.86    2.34 
  22   6  -2    4.75    2.14 
  22   6  -2    4.58    2.38 
 -22   6   2    3.00    2.24 
 -22   6   2    5.86    3.03 
 -22   6   2    4.79    2.70 
  22   6  -2    8.93    2.48 
  20  -6  -2   10.16    2.15 
  20  -6  -2    5.07    2.58 
  20  -6  -2    3.38    2.44 
  20  -6  -2    4.30    2.52 
  20   6  -2    6.30    2.09 
 -20   6   2    5.72    2.00 
  20   6  -2    6.02    2.00 
 -20   6   2    5.36    2.43 
 -20   6   2    8.54    2.82 
  20   6  -2    7.91    2.21 
  18  -6  -2    9.09    2.50 
  18  -6  -2    5.24    1.88 
  18  -6  -2    5.34    2.24 
  18  -6  -2    9.52    2.32 
 -18   6   2    8.63    2.73 
 -18   6   2    5.49    2.18 
 -18   6   2    4.79    1.86 
  18   6  -2   11.01    2.04 
  18   6  -2    8.40    1.93 
  16  -6  -2    3.27    1.86 
  16  -6  -2    8.49    1.83 
 -16  -6   2    2.14    1.84 
  16  -6  -2    7.22    2.20 
  16  -6  -2    6.63    1.88 
  16  -6  -2    8.68    1.89 
 -16   6   2    4.87    1.87 
  16   6  -2    0.25    1.85 
 -16   6   2    0.58    1.53 
  16   6  -2    6.71    1.77 
  16   6  -2    4.38    1.64 
 -16   6   2    7.14    2.22 
 -16   6   2    2.73    1.63 
  16   6  -2    3.75    2.65 
 -14  -6   2    0.14    1.82 
  14  -6  -2   -0.05    1.91 
  14  -6  -2    2.73    1.51 
  14  -6  -2   -0.39    1.62 
  14  -6  -2    0.07    1.59 
  14   6  -2   -1.01    2.31 
 -14   6   2   -1.47    1.49 
  14   6  -2    2.67    1.67 
  14   6  -2   -2.66    1.89 
  14   6  -2    0.52    1.57 
  14   6  -2   -1.42    1.44 
 -14   6   2    0.45    1.83 
 -14   6   2   -2.56    1.32 
 -14   6   2   -0.87    1.46 
  12  -6  -2    3.58    1.61 
  12  -6  -2    3.93    1.76 
  12  -6  -2    1.76    0.97 
  12  -6  -2   -0.26    1.50 
 -12  -6   2    1.82    1.43 
  12  -6  -2    0.78    1.31 
 -12   6   2    0.93    1.26 
  12   6  -2    0.62    1.46 
  12   6  -2    0.49    1.67 
  12   6  -2    1.79    1.37 
  12   6  -2   -1.48    2.10 
 -12   6   2    4.26    1.50 
 -12   6   2    3.65    1.52 
 -12   6   2    3.85    1.80 
  12   6  -2    6.32    1.50 
  10  -6  -2    0.72    1.36 
  10  -6  -2   -1.48    1.57 
 -10  -6   2    1.75    1.41 
  10  -6  -2    0.74    1.18 
  10  -6  -2    0.38    1.37 
  10  -6  -2    0.98    0.97 
 -10   6   2    0.12    1.40 
  10   6  -2   -1.96    1.52 
  10   6  -2   -0.80    1.26 
 -10   6   2   -0.16    1.46 
 -10   6   2    1.55    1.61 
 -10   6   2    0.36    1.14 
  10   6  -2   -1.61    1.22 
  10   6  -2    0.67    2.04 
   8  -6  -2    9.83    1.95 
  -8  -6   2    8.82    1.75 
   8  -6  -2    6.70    1.33 
   8  -6  -2    5.43    1.32 
   8  -6  -2    7.63    1.34 
   8  -6  -2    5.95    1.26 
   8   6  -2    9.82    1.42 
  -8   6   2    9.08    1.74 
   8   6  -2    5.64    1.55 
  -8   6   2    8.73    1.67 
  -8   6   2    8.93    1.48 
   8   6  -2    7.45    1.52 
  -8   6   2    6.49    1.20 
   8   6  -2    7.03    2.09 
  -6  -6   2   24.18    2.19 
   6  -6  -2   19.17    1.88 
   6  -6  -2   17.79    2.22 
   6  -6  -2   18.26    1.91 
   6  -6  -2   18.73    1.94 
   6  -6  -2   21.30    1.97 
   6   6  -2   17.11    2.17 
  -6   6   2   22.41    2.01 
  -6   6   2   21.53    1.61 
   6   6  -2   17.17    2.25 
   6   6  -2   21.00    1.80 
  -6   6   2   16.79    1.88 
   6   6  -2   18.33    2.41 
   4  -6  -2   28.94    2.16 
   4  -6  -2   26.57    2.75 
  -4  -6   2   28.24    2.17 
  -4   6   2   33.55    2.16 
   4   6  -2   31.08    1.79 
   4   6  -2   31.47    2.32 
   4   6  -2   31.00    3.09 
  -4   6   2   29.86    1.76 
   2  -6  -2   17.05    2.14 
   2  -6  -2   14.19    1.87 
  -2  -6   2   14.80    2.08 
  -2  -6   2   14.10    1.83 
   2   6  -2   16.07    2.00 
   2   6  -2   16.51    2.15 
  -2   6   2   16.78    1.50 
  -2   6   2   15.14    1.77 
  -2   6   2   15.36    1.52 
   2   6  -2   15.36    1.45 
   0  -6   2    3.22    1.67 
   0  -6  -2    0.10    1.18 
   0   6  -2    0.02    1.15 
   0   6  -2    4.02    1.76 
   0   6   2    2.74    1.09 
  -2  -6  -2   19.05    2.23 
   2  -6   2   20.99    2.31 
  -2   6  -2   17.46    2.14 
   2   6   2   20.86    2.08 
  -2   6  -2   20.51    1.87 
  -2   6  -2   18.99    1.91 
  -4  -6  -2   28.71    2.50 
   4  -6   2   29.17    2.99 
   4  -6   2   33.59    2.45 
  -4   6  -2   28.72    2.08 
  -4   6  -2   30.48    2.86 
  -4   6  -2   33.85    2.25 
   4   6   2   30.54    2.50 
   6  -6   2   20.96    2.43 
  -6  -6  -2   24.38    2.55 
   6  -6   2   21.23    1.84 
   6  -6   2   16.73    2.13 
  -6   6  -2   17.54    1.64 
  -6   6  -2   21.31    2.08 
   6   6   2   22.19    2.44 
  -6   6  -2   21.79    2.19 
  -6   6  -2   20.19    2.30 
  -6   6  -2   18.02    2.19 
   8  -6   2   12.85    2.15 
  -8  -6  -2   12.06    1.80 
   8  -6   2    8.71    1.38 
   8  -6   2   12.39    1.90 
   8  -6   2   13.45    1.56 
   8  -6   2   12.48    1.44 
   8   6   2   11.73    1.91 
   8   6   2   10.94    1.77 
  -8   6  -2    9.80    1.28 
  -8   6  -2   14.15    1.62 
  -8   6  -2   12.59    1.68 
  -8   6  -2   16.05    1.90 
  -8   6  -2   10.26    1.72 
  10  -6   2   -0.20    1.29 
  10  -6   2    1.55    1.39 
  10  -6   2    1.97    1.76 
  10  -6   2   -0.85    1.38 
 -10  -6  -2   -0.62    1.54 
  10  -6   2    1.87    1.81 
  10   6   2   -1.42    1.56 
  10   6   2   -3.66    2.05 
 -10   6  -2   -1.04    1.10 
 -10   6  -2   -0.71    1.14 
 -10   6  -2    0.76    1.39 
 -10   6  -2    0.29    1.41 
 -10   6  -2    0.97    1.64 
  10   6   2   -1.43    1.63 
  12  -6   2    1.58    1.42 
  12  -6   2    4.67    1.73 
 -12  -6  -2    1.13    1.81 
  12  -6   2    2.39    2.14 
  12  -6   2    0.37    2.04 
 -12   6  -2    3.28    1.60 
 -12   6  -2   -0.71    1.22 
 -12   6  -2    1.03    1.36 
 -12   6  -2    1.40    1.87 
  12   6   2    5.88    2.39 
 -12   6  -2    0.56    1.62 
  12   6   2    3.62    1.79 
  12   6   2    3.25    1.61 
  14  -6   2    9.16    2.07 
  14  -6   2    9.84    2.45 
 -14  -6  -2    1.93    2.03 
  14  -6   2    9.27    2.35 
  14  -6   2    8.48    1.73 
  14  -6   2    9.47    2.08 
 -14   6  -2    6.57    1.92 
 -14   6  -2    9.56    1.56 
 -14   6  -2    5.99    1.90 
 -14   6  -2    9.77    2.22 
  14   6   2   10.99    2.15 
  16  -6   2    6.58    2.82 
  16  -6   2    9.06    1.90 
 -16  -6  -2    6.98    2.23 
  16  -6   2   10.98    2.50 
  16  -6   2   10.73    2.40 
  16   6   2    7.09    1.89 
 -16   6  -2    7.77    2.53 
  16   6   2    8.56    1.44 
 -16   6  -2   10.70    2.27 
  16   6   2    8.24    2.11 
 -16   6  -2    7.36    1.70 
 -16   6  -2    8.09    2.20 
  18  -6   2   -2.43    1.91 
  18  -6   2    2.68    3.09 
  18  -6   2   -0.81    2.56 
 -18  -6  -2    2.03    2.27 
  18  -6   2    4.61    2.94 
 -18   6  -2    2.25    2.60 
 -18   6  -2    1.13    1.62 
  18   6   2    1.52    2.07 
  18   6   2    2.41    1.59 
 -18   6  -2    6.93    2.36 
 -18   6  -2    1.27    2.27 
  18   6   2   -0.46    2.13 
  20  -6   2    3.48    3.22 
  20  -6   2    0.29    3.04 
  20  -6   2    1.20    2.33 
 -20  -6  -2    4.68    3.12 
  20   6   2    1.18    2.20 
 -20   6  -2   -2.51    2.92 
 -20   6  -2    3.46    1.92 
  20   6   2    0.83    2.37 
 -20   6  -2    5.00    2.76 
 -20   6  -2   -0.33    2.62 
  22  -6   2    4.66    2.71 
 -22  -6  -2    5.15    3.12 
  22  -6   2    9.97    3.35 
  22   6   2    2.55    2.55 
 -22   6  -2    0.57    3.43 
 -22   6  -2    3.39    3.12 
 -22   6  -2    7.06    2.93 
 -22   6  -2    6.13    2.18 
  24  -6   2    9.92    3.23 
 -24  -6  -2    7.22    3.11 
 -24  -6  -2    5.95    3.62 
  24  -6   2   10.69    3.90 
 -24   6  -2    5.71    3.35 
  24   6   2    1.56    2.89 
 -24   6  -2    2.86    4.12 
  23  -7  -2    1.16    4.06 
  23  -7  -2   15.57    3.44 
  23   7  -2    3.75    3.04 
  23   7  -2   -1.44    3.27 
 -23   7   2   12.63    4.33 
 -23   7   2    7.10    3.74 
  21  -7  -2    9.20    3.00 
  21  -7  -2    5.41    3.94 
 -21   7   2    6.07    3.75 
  21   7  -2    2.70    2.65 
  21   7  -2    0.83    2.97 
 -21   7   2   10.52    3.34 
  19  -7  -2    1.47    2.40 
  19  -7  -2   -1.85    3.15 
  19  -7  -2    1.83    3.20 
  19   7  -2   -0.52    2.56 
  19   7  -2   -0.59    2.61 
  19   7  -2    2.77    2.37 
 -19   7   2    2.54    3.50 
  19   7  -2    0.71    2.71 
 -19   7   2   -2.75    2.90 
  17  -7  -2    1.70    3.03 
  17  -7  -2    0.72    2.75 
  17  -7  -2    6.06    2.94 
  17  -7  -2   -3.02    2.14 
  17   7  -2    3.63    2.24 
 -17   7   2    1.40    2.56 
  17   7  -2    1.99    2.44 
 -17   7   2    5.82    3.14 
 -17   7   2   -2.15    2.16 
  15  -7  -2    3.60    2.37 
  15  -7  -2   16.69    3.01 
  15  -7  -2    8.71    2.17 
  15   7  -2    7.53    2.18 
 -15   7   2    6.84    2.32 
 -15   7   2    3.77    2.45 
  15   7  -2    6.59    2.19 
 -15   7   2   11.31    2.96 
  13  -7  -2   10.37    2.24 
  13  -7  -2   11.04    2.13 
  13  -7  -2   11.10    3.17 
  13   7  -2   18.43    2.42 
  13   7  -2   16.15    2.25 
 -13   7   2   12.61    2.36 
 -13   7   2   15.83    2.83 
 -13   7   2   11.47    2.37 
  11  -7  -2    6.24    1.48 
  11  -7  -2    4.49    1.90 
 -11  -7   2    7.34    2.10 
  11  -7  -2    3.35    1.80 
  11  -7  -2    4.86    2.00 
  11  -7  -2   11.62    2.82 
  11   7  -2    3.53    2.26 
  11   7  -2    7.72    1.90 
 -11   7   2    8.73    2.42 
 -11   7   2    8.80    1.96 
  11   7  -2    8.26    2.05 
 -11   7   2    4.45    1.64 
 -11   7   2    9.13    2.57 
   9  -7  -2   -0.48    1.42 
  -9  -7   2    5.21    2.01 
   9  -7  -2   -0.83    1.64 
   9  -7  -2    1.78    2.48 
   9  -7  -2    2.26    1.65 
  -9   7   2    1.97    2.10 
   9   7  -2    1.63    1.49 
  -9   7   2    1.36    1.53 
   9   7  -2    4.08    2.16 
   9   7  -2    2.45    1.81 
  -9   7   2   -1.87    2.16 
  -9   7   2    1.28    1.74 
   7  -7  -2   -0.72    1.46 
   7  -7  -2    2.54    2.22 
  -7  -7   2    0.82    1.71 
   7  -7  -2    1.00    1.52 
   7   7  -2   -1.12    1.80 
   7   7  -2   -2.95    1.95 
   7   7  -2    0.76    1.47 
  -7   7   2    0.73    1.97 
  -7   7   2    2.13    2.22 
   7   7  -2    3.35    2.79 
  -7   7   2   -1.20    1.37 
   5  -7  -2    5.19    2.43 
   5  -7  -2    4.97    1.59 
   5   7  -2    1.11    1.86 
  -5   7   2    4.57    1.75 
   5   7  -2    4.44    2.83 
  -5   7   2    3.93    1.34 
   5   7  -2    4.78    1.84 
   5   7  -2    4.76    1.47 
   3  -7  -2   34.27    3.75 
   3  -7  -2   25.83    2.71 
   3   7  -2   24.81    2.98 
   3   7  -2   28.48    2.13 
   3   7  -2   28.22    3.34 
   1  -7  -2    1.50    1.67 
  -1  -7   2    5.33    2.47 
   1   7  -2    3.71    2.63 
  -1   7   2    1.97    1.31 
   1   7  -2    2.39    1.77 
   1  -7   2   17.73    2.75 
  -1  -7  -2   15.58    2.16 
   1   7   2   13.18    1.84 
  -1   7  -2   13.46    2.76 
  -3  -7  -2   -1.73    1.83 
   3  -7   2    3.25    2.38 
   3   7   2    1.53    1.79 
  -3   7  -2    1.55    1.87 
   5  -7   2    2.73    2.28 
  -5  -7  -2    0.56    1.88 
  -5   7  -2    2.09    1.88 
   5   7   2    0.06    2.11 
  -7  -7  -2    0.98    1.89 
   7  -7   2    3.96    2.22 
   7  -7   2    1.27    2.39 
   7   7   2    1.72    2.15 
  -7   7  -2    1.06    1.36 
  -7   7  -2    7.12    1.89 
  -7   7  -2    0.61    1.69 
  -7   7  -2    2.26    1.94 
   9  -7   2   -1.61    2.31 
   9  -7   2    2.20    1.69 
   9  -7   2    1.28    1.59 
  -9  -7  -2   -1.15    2.11 
   9  -7   2    2.48    2.37 
  -9   7  -2   -1.26    1.83 
  -9   7  -2    3.67    2.24 
  -9   7  -2   -1.50    1.70 
   9   7   2    2.99    2.30 
  -9   7  -2    2.49    1.53 
  11  -7   2    4.33    2.20 
  11  -7   2    2.34    2.77 
  11  -7   2   10.62    2.71 
 -11  -7  -2    1.52    2.52 
  11  -7   2    8.64    1.98 
  11  -7   2    2.70    2.03 
  11   7   2    5.95    2.30 
 -11   7  -2    3.83    2.61 
 -11   7  -2    5.12    2.24 
 -11   7  -2    2.19    1.72 
 -11   7  -2    3.93    2.10 
  13  -7   2    2.19    2.53 
  13  -7   2    4.22    2.18 
  13  -7   2    6.48    2.94 
 -13  -7  -2    3.81    2.56 
  13  -7   2    7.44    3.06 
 -13   7  -2    8.16    2.57 
  13   7   2    3.88    2.38 
 -13   7  -2    6.82    1.98 
 -13   7  -2    7.55    2.81 
 -13   7  -2    5.78    2.33 
  15  -7   2    5.46    2.43 
  15  -7   2    5.43    3.14 
 -15  -7  -2    2.11    2.63 
  15   7   2    5.41    2.66 
 -15   7  -2    1.15    2.03 
 -15   7  -2    0.16    2.96 
 -15   7  -2    1.15    2.71 
 -15   7  -2    0.89    2.40 
 -17  -7  -2    6.33    2.97 
  17  -7   2    7.99    2.71 
  17  -7   2    6.57    3.44 
  17  -7   2    4.43    4.06 
 -17   7  -2    5.15    3.00 
 -17   7  -2    2.53    3.49 
 -17   7  -2    7.83    2.88 
  17   7   2    7.83    2.86 
 -19  -7  -2    8.52    3.55 
  19  -7   2   13.93    4.16 
  19  -7   2    1.84    3.06 
  19   7   2    8.34    3.14 
 -19   7  -2    3.15    3.30 
 -19   7  -2    3.95    3.14 
  16  -8  -2   -4.67    2.89 
  16  -8  -2    5.56    3.98 
 -16   8   2    5.63    3.33 
  16   8  -2    3.04    3.13 
  16   8  -2   -0.94    3.10 
  14  -8  -2   -1.76    2.66 
  14  -8  -2    4.18    3.93 
  14   8  -2   -3.59    2.71 
 -14   8   2    3.21    3.01 
  14   8  -2    0.73    2.75 
  12  -8  -2    0.28    2.50 
  12  -8  -2    0.92    3.70 
  12   8  -2    9.16    2.92 
  12   8  -2    2.58    2.58 
 -12   8   2    1.20    2.63 
  10  -8  -2    8.10    3.51 
  10  -8  -2    5.37    2.39 
  10  -8  -2    4.20    1.97 
  10   8  -2    4.40    2.34 
  10   8  -2    4.10    2.69 
   8  -8  -2    3.40    2.02 
   8  -8  -2    0.37    3.41 
   8   8  -2   -2.33    2.11 
   8   8  -2    1.35    2.39 
   6  -8  -2    4.60    2.21 
   6  -8  -2   11.30    3.59 
   6   8  -2   11.14    2.60 
   6   8  -2    9.86    2.10 
   4  -8  -2    9.76    2.39 
   4  -8  -2   13.16    3.24 
   4   8  -2   13.93    2.93 
   4   8  -2   17.41    2.09 
   4   8  -2   15.93    2.71 
   4   8  -2   15.40    2.41 
   2  -8  -2   -2.36    2.14 
   2   8  -2    1.59    2.57 
   0  -8   2    1.19    3.02 
   0  -8  -2    2.48    2.39 
   0   8   2    2.53    1.96 
   0   8   2    1.41    1.73 
  -2  -8  -2    7.48    2.65 
   2  -8   2    3.28    3.13 
   2   8   2   10.56    2.41 
  -2   8  -2   14.31    3.00 
  -4  -8  -2   -3.39    2.62 
   4  -8   2   -4.68    2.98 
  -4   8  -2    2.12    2.78 
   4   8   2    2.26    2.62 
   4   8   2   -0.09    2.75 
  -6  -8  -2   -2.16    2.78 
   6  -8   2    5.97    3.40 
   6   8   2    3.26    2.79 
   6   8   2    1.83    2.92 
  -6   8  -2    2.07    2.73 
  -8  -8  -2    7.83    2.81 
   8  -8   2   10.75    3.72 
  -8   8  -2    5.80    2.46 
   8   8   2   11.46    3.16 
   8   8   2    5.92    3.40 
  10  -8   2    1.68    3.77 
 -10  -8  -2    5.26    3.09 
  10   8   2    3.69    4.21 
  10   8   2   -1.97    2.92 
  12  -8   2    5.91    2.62 
 -12  -8  -2    9.05    3.38 
  12  -8   2   11.01    4.50 
  12   8   2    9.20    3.27 
 -12   8  -2    4.73    2.90 
  14  -8   2    3.37    4.30 
 -14  -8  -2    5.52    3.56 
  14  -8   2   -3.88    2.97 
 -14   8  -2   -0.08    3.50 
  14   8   2    3.55    3.45 
 -14   8  -2   -3.07    3.18 
   3  -9  -2    5.73    3.18 
   1  -9  -2    2.90    3.25 
  36   0  -3    6.10    2.95 
 -36   0   3    9.28    3.39 
  36   0  -3    9.50    3.13 
  36   0  -3    9.59    2.78 
 -36   0   3    7.10    3.59 
  34   0  -3   10.79    2.52 
  34   0  -3   11.67    2.59 
  34   0  -3   19.00    2.53 
 -34   0   3   16.44    3.21 
 -34   0   3   15.25    3.33 
  34   0  -3   14.39    2.49 
  34   0  -3   18.08    3.48 
 -34   0   3   12.60    2.89 
 -32   0   3    3.43    2.53 
  32   0  -3    9.00    2.06 
  32   0  -3    7.33    2.17 
  32   0  -3    8.78    2.80 
 -32   0   3    8.95    2.23 
  32   0  -3    7.71    2.10 
  32   0  -3    9.30    2.02 
 -32   0   3   11.78    2.54 
  30   0  -3    1.05    1.58 
 -30   0   3   -0.25    1.48 
  30   0  -3    2.28    2.13 
 -30   0   3   -1.75    1.96 
  30   0  -3    0.07    1.78 
 -30   0   3    1.20    1.81 
  30   0  -3    1.10    1.56 
  30   0  -3    0.13    1.44 
  28   0  -3    2.54    1.49 
  28   0  -3    3.32    1.37 
  28   0  -3    3.59    1.55 
  28   0  -3    1.36    1.72 
 -28   0   3    5.75    1.81 
 -28   0   3    1.00    1.64 
  28   0  -3    3.55    1.43 
 -28   0   3    6.54    1.62 
 -28   0   3    2.34    1.37 
  26   0  -3   10.06    1.70 
  26   0  -3    9.63    1.45 
  26   0  -3    9.39    1.32 
 -26   0   3    9.47    1.62 
  26   0  -3   10.31    1.54 
 -26   0   3   12.84    1.87 
 -26   0   3    8.05    1.45 
  26   0  -3   10.27    1.60 
 -26   0   3    9.79    1.40 
 -24   0   3   16.56    1.62 
 -24   0   3   19.09    2.12 
 -24   0   3   16.42    2.03 
  24   0  -3   18.12    2.04 
  24   0  -3   17.48    1.79 
  24   0  -3   17.28    1.92 
  24   0  -3   18.32    1.85 
  24   0  -3   14.31    1.81 
  24   0  -3   16.76    1.53 
  24   0  -3   18.09    1.93 
 -24   0   3   18.16    1.85 
 -22   0   3    3.75    0.91 
  22   0  -3    3.15    1.00 
  22   0  -3    1.81    0.81 
  22   0  -3    3.37    1.02 
  22   0  -3    2.39    0.92 
  22   0  -3    3.93    0.98 
 -22   0   3    4.43    1.12 
  22   0  -3    2.80    0.93 
 -22   0   3    3.68    0.95 
  22   0  -3    2.22    0.95 
 -22   0   3    1.94    1.14 
  20   0  -3   14.07    1.47 
 -20   0   3   15.73    1.56 
  20   0  -3   18.23    1.38 
  20   0  -3   14.99    1.46 
  20   0  -3   15.93    1.40 
 -20   0   3   16.78    1.64 
  20   0  -3   16.70    1.16 
  20   0  -3   15.84    1.47 
 -20   0   3   14.99    1.17 
  20   0  -3   14.59    1.37 
 -20   0   3   16.07    1.39 
  18   0  -3   53.49    2.00 
  18   0  -3   50.77    2.01 
 -18   0   3   57.56    2.10 
  18   0  -3   52.63    1.95 
  18   0  -3   52.78    2.01 
  18   0  -3   56.44    1.94 
 -18   0   3   52.69    2.22 
  18   0  -3   53.14    2.12 
 -18   0   3   56.38    1.98 
  18   0  -3   54.48    1.81 
 -18   0   3   53.70    1.80 
  16   0  -3    5.37    0.70 
  16   0  -3    5.60    0.82 
 -16   0   3    5.10    0.71 
 -16   0   3    5.44    0.69 
 -16   0   3    4.78    0.76 
  16   0  -3    5.29    0.74 
  16   0  -3    5.66    0.76 
  16   0  -3    4.36    0.68 
  16   0  -3    4.50    0.84 
 -16   0   3    5.70    0.82 
 -14   0   3   65.27    2.10 
  14   0  -3   61.16    1.98 
  14   0  -3   60.91    1.83 
  14   0  -3   62.97    1.80 
 -14   0   3   63.38    1.86 
  14   0  -3   59.63    1.88 
  14   0  -3   60.76    1.72 
 -14   0   3   63.29    1.72 
  14   0  -3   63.69    1.88 
 -14   0   3   61.14    1.90 
  12   0  -3  315.02    5.71 
  12   0  -3  319.37    5.69 
  12   0  -3  322.62    5.85 
  12   0  -3  319.31    5.95 
 -12   0   3  322.72    5.76 
 -12   0   3  334.82    5.78 
 -12   0   3  324.00    5.81 
  12   0  -3  318.08    5.76 
 -12   0   3  319.13    6.01 
 -10   0   3   14.09    0.82 
 -10   0   3   14.94    0.89 
  10   0  -3   14.55    0.83 
 -10   0   3   15.17    0.67 
  10   0  -3   14.30    0.68 
  10   0  -3   14.74    0.79 
 -10   0   3   14.40    0.75 
  10   0  -3   13.95    0.77 
 -10   0   3   13.94    0.75 
  10   0  -3   14.29    0.81 
  -8   0   3   26.07    0.82 
   8   0  -3   27.14    0.95 
   8   0  -3   28.61    1.03 
  -8   0   3   27.39    0.92 
   8   0  -3   27.60    0.94 
   8   0  -3   27.98    0.96 
   8   0  -3   27.02    0.85 
  -8   0   3   28.40    1.06 
  -8   0   3   27.99    0.99 
  -6   0   3  297.76    5.12 
  -6   0   3  314.41    5.24 
  -6   0   3  307.47    5.31 
  -6   0   3  313.02    5.19 
   6   0  -3  305.48    5.16 
   6   0  -3  310.71    5.25 
  -6   0   3  317.84    5.23 
   6   0  -3  307.03    5.24 
   6   0  -3  307.88    5.14 
   6   0  -3  310.61    5.31 
   4   0  -3  324.21    5.50 
   4   0  -3  323.95    5.44 
  -4   0   3  335.59    5.47 
  -4   0   3  329.40    5.46 
  -4   0   3  328.11    5.35 
  -4   0   3  321.00    5.37 
   4   0  -3  323.34    5.48 
  -4   0   3  338.95    5.52 
   4   0  -3  348.50    5.41 
   4   0  -3  323.47    5.35 
   2   0  -3  383.82    5.96 
   2   0  -3  380.14    6.12 
  -2   0   3  377.70    5.99 
  -2   0   3  373.71    6.03 
  -2   0   3  369.14    6.10 
   2   0  -3  373.55    6.15 
  -2   0   3  369.56    5.93 
   2   0  -3  370.79    5.98 
   0   0  -3    8.31    0.48 
   0   0  -3    8.12    0.47 
   0   0  -3    7.75    0.47 
   0   0   3    6.97    0.46 
   0   0   3    6.93    0.47 
   0   0   3    7.38    0.47 
   0   0  -3    7.53    0.46 
   0   0   3    7.11    0.44 
   0   0  -3    7.38    0.46 
   0   0   3    8.50    0.49 
   2   0   3  196.90    3.45 
  -2   0  -3  200.67    3.61 
  -2   0  -3  194.25    3.56 
  -2   0  -3  192.28    3.43 
  -2   0  -3  191.17    3.47 
   2   0   3  200.98    3.46 
   2   0   3  190.32    3.56 
   2   0   3  197.36    3.54 
   2   0   3  196.32    3.49 
   4   0   3   99.09    2.13 
  -4   0  -3   98.44    2.19 
   4   0   3  100.37    2.24 
  -4   0  -3  104.29    2.22 
  -4   0  -3   99.15    2.09 
  -4   0  -3  102.70    2.28 
   4   0   3  100.47    2.03 
  -4   0  -3   98.22    2.12 
  -4   0  -3  102.24    2.17 
  -4   0  -3   98.58    2.09 
   6   0   3    0.58    0.35 
  -6   0  -3    0.62    0.38 
  -6   0  -3    0.51    0.29 
   6   0   3    0.22    0.24 
   6   0   3    0.33    0.31 
  -6   0  -3    0.04    0.31 
  -6   0  -3    0.43    0.32 
  -6   0  -3    0.35    0.36 
  -6   0  -3    0.34    0.29 
   6   0   3    0.33    0.33 
   6   0   3    0.45    0.36 
   8   0   3   15.41    0.98 
  -8   0  -3   14.22    0.82 
   8   0   3   13.77    0.73 
   8   0   3   15.27    0.91 
   8   0   3   14.21    0.93 
  -8   0  -3   14.31    0.80 
  -8   0  -3   13.05    0.87 
  -8   0  -3   14.06    0.91 
   8   0   3   14.86    0.91 
  -8   0  -3   13.88    0.98 
  -8   0  -3   14.32    0.93 
  10   0   3    0.99    0.54 
  10   0   3    1.12    0.38 
  10   0   3    1.90    0.58 
 -10   0  -3    1.10    0.58 
 -10   0  -3    1.10    0.49 
  10   0   3    1.66    0.49 
 -10   0  -3    2.18    0.50 
 -10   0  -3    1.21    0.63 
  10   0   3    1.82    0.56 
 -10   0  -3    0.84    0.48 
  12   0   3    4.24    0.86 
 -12   0  -3    3.57    0.68 
 -12   0  -3    3.00    0.59 
 -12   0  -3    4.20    0.77 
 -12   0  -3    3.64    0.63 
  12   0   3    3.94    0.74 
  12   0   3    3.76    0.56 
  12   0   3    3.90    0.67 
 -12   0  -3    3.72    0.88 
  12   0   3    3.45    0.64 
  12   0   3    4.01    0.65 
  14   0   3   11.02    0.93 
  14   0   3   11.31    1.31 
 -14   0  -3   10.31    1.21 
 -14   0  -3   10.69    1.34 
  14   0   3    9.32    1.03 
 -14   0  -3   11.24    1.08 
 -14   0  -3    9.87    1.17 
 -14   0  -3   10.51    1.03 
  14   0   3   11.43    1.23 
  14   0   3   10.76    1.34 
  14   0   3    9.63    1.15 
 -16   0  -3    2.85    0.75 
  16   0   3    3.71    0.98 
  16   0   3    3.88    0.73 
  16   0   3    3.49    0.89 
  16   0   3    4.14    0.83 
 -16   0  -3    4.42    0.95 
  16   0   3    4.76    1.08 
 -16   0  -3    3.65    1.02 
 -16   0  -3    4.79    0.89 
  16   0   3    3.79    0.87 
 -16   0  -3    3.66    0.94 
 -18   0  -3    5.39    1.11 
  18   0   3    6.57    1.33 
  18   0   3    5.05    0.84 
 -18   0  -3    5.53    1.00 
 -18   0  -3    5.20    1.01 
  18   0   3    6.82    1.19 
  18   0   3    5.80    0.98 
  18   0   3    4.67    1.19 
 -18   0  -3    5.36    1.25 
  18   0   3    5.80    1.03 
 -18   0  -3    6.20    1.39 
  20   0   3   -1.17    1.23 
  20   0   3    0.59    0.98 
 -20   0  -3    0.72    1.01 
 -20   0  -3    1.73    1.15 
  20   0   3    0.60    1.26 
 -20   0  -3    1.58    0.92 
  20   0   3    1.34    0.95 
  20   0   3    1.04    0.83 
  20   0   3    2.35    1.20 
 -20   0  -3    0.21    1.14 
  22   0   3    3.39    1.43 
 -22   0  -3    2.58    1.37 
  22   0   3    7.71    1.49 
  22   0   3    4.63    1.10 
 -22   0  -3    3.51    1.47 
  22   0   3    6.67    1.60 
 -22   0  -3    3.77    1.10 
 -22   0  -3    4.11    1.31 
  22   0   3    4.07    1.65 
 -24   0  -3   -1.27    1.45 
  24   0   3    1.97    1.42 
  24   0   3    0.96    1.60 
  24   0   3    3.17    1.76 
  24   0   3   -2.05    1.76 
 -24   0  -3    1.18    1.51 
 -24   0  -3    1.90    1.70 
 -24   0  -3    0.65    1.49 
  24   0   3    0.66    1.10 
 -26   0  -3   15.28    2.52 
  26   0   3   13.13    2.55 
  26   0   3   18.83    2.31 
  26   0   3   14.60    1.93 
 -26   0  -3   19.53    2.46 
 -26   0  -3   16.38    2.42 
  28   0   3    4.64    1.72 
  28   0   3    1.83    2.95 
 -28   0  -3    3.06    2.56 
 -28   0  -3    4.48    2.90 
  28   0   3    2.54    2.07 
 -28   0  -3    0.00    2.33 
  30   0   3    3.79    2.48 
 -30   0  -3   -2.96    2.90 
  30   0   3    2.83    2.07 
 -30   0  -3    3.89    2.91 
 -32   0  -3    0.28    3.88 
  32   0   3   -5.78    2.83 
 -32   0  -3    5.25    3.40 
  32   0   3   -2.85    2.59 
 -37  -1   3   -2.60    3.51 
  37  -1  -3   -2.51    3.27 
  37  -1  -3    9.55    3.41 
 -37  -1   3    4.66    3.86 
  37  -1  -3    8.43    3.33 
  37   1  -3    3.66    3.24 
  37   1  -3    4.40    2.85 
 -37   1   3    3.71    3.85 
 -37   1   3   -1.56    3.71 
  37   1  -3    2.93    3.44 
  35  -1  -3    3.71    2.47 
  35  -1  -3   -4.26    2.53 
 -35  -1   3   -0.15    3.23 
 -35  -1   3   -4.68    2.89 
  35  -1  -3    1.71    2.66 
 -35   1   3    2.87    3.20 
  35   1  -3    7.76    3.56 
  35   1  -3    0.28    2.30 
  35   1  -3    4.04    2.68 
 -35   1   3    1.13    3.18 
  35   1  -3    3.03    2.65 
 -33  -1   3   -0.56    2.53 
  33  -1  -3    0.68    2.18 
 -33  -1   3   -5.34    2.55 
  33  -1  -3    3.38    2.05 
 -33  -1   3   -0.23    2.13 
  33  -1  -3    2.21    2.23 
  33  -1  -3    0.43    1.88 
  33   1  -3   -3.25    2.28 
  33   1  -3    1.18    2.94 
 -33   1   3   -0.45    2.66 
  33   1  -3   -0.93    1.88 
  33   1  -3    2.42    2.24 
 -33   1   3    2.24    2.56 
 -31  -1   3    3.84    2.22 
  31  -1  -3    3.16    2.30 
  31  -1  -3    6.16    1.75 
  31  -1  -3    5.48    2.00 
 -31  -1   3    7.69    2.07 
  31  -1  -3    9.61    1.86 
 -31  -1   3   11.22    2.38 
  31  -1  -3    3.94    1.85 
  31   1  -3    7.98    2.01 
 -31   1   3    6.83    2.48 
 -31   1   3    7.32    2.60 
  31   1  -3    3.95    2.07 
  31   1  -3    6.06    2.03 
  31   1  -3    7.71    1.70 
  31   1  -3    4.67    2.31 
  29  -1  -3    4.32    1.84 
  29  -1  -3    1.20    1.29 
  29  -1  -3   -0.34    1.51 
 -29  -1   3   -0.73    1.55 
 -29  -1   3   -0.33    1.46 
  29  -1  -3    2.65    1.49 
 -29  -1   3    0.91    1.71 
  29  -1  -3    0.24    1.56 
 -29  -1   3    3.63    1.75 
  29  -1  -3   -0.94    1.91 
  29   1  -3   -0.89    1.59 
  29   1  -3    2.45    1.81 
 -29   1   3    0.16    1.54 
 -29   1   3    0.96    1.50 
  29   1  -3   -1.44    1.47 
  29   1  -3    3.49    1.44 
  29   1  -3    1.12    1.53 
  29   1  -3    3.14    1.89 
 -29   1   3    2.86    1.79 
 -29   1   3   -0.38    1.85 
  27  -1  -3    3.46    1.41 
  27  -1  -3    7.53    1.54 
 -27  -1   3    6.13    1.54 
  27  -1  -3    3.00    1.26 
 -27  -1   3    3.86    1.64 
 -27  -1   3    3.78    1.30 
  27  -1  -3    3.29    1.20 
  27  -1  -3    4.60    1.68 
 -27   1   3    4.79    1.35 
 -27   1   3    3.11    1.51 
  27   1  -3    4.12    1.44 
  27   1  -3    4.04    1.18 
  27   1  -3    2.98    1.49 
 -27   1   3    2.36    1.63 
  27   1  -3    3.45    1.40 
  27   1  -3    3.80    1.59 
  27   1  -3    4.62    1.39 
 -27   1   3    6.47    1.77 
  25  -1  -3    3.98    1.14 
 -25  -1   3    1.41    1.05 
  25  -1  -3    4.58    1.11 
 -25  -1   3    4.71    1.39 
  25  -1  -3    4.88    1.27 
 -25  -1   3    4.52    1.44 
  25  -1  -3    3.97    1.31 
  25  -1  -3    5.78    1.63 
  25  -1  -3    6.43    1.36 
  25  -1  -3    5.99    1.53 
  25   1  -3    4.59    1.28 
  25   1  -3    4.85    1.27 
 -25   1   3    3.69    1.51 
  25   1  -3    4.08    1.03 
 -25   1   3    3.36    1.24 
  25   1  -3    4.70    1.27 
  25   1  -3    3.31    1.27 
 -25   1   3    2.28    1.33 
 -25   1   3    2.39    0.99 
  25   1  -3    0.34    1.19 
  25   1  -3    3.45    1.32 
 -23  -1   3   26.42    2.15 
 -23  -1   3   27.91    1.86 
 -23  -1   3   25.52    1.78 
  23  -1  -3   24.65    2.12 
  23  -1  -3   28.75    1.91 
  23  -1  -3   27.71    1.75 
  23  -1  -3   29.95    2.00 
 -23  -1   3   29.96    2.17 
  23  -1  -3   29.69    1.97 
  23  -1  -3   25.99    1.69 
  23  -1  -3   24.99    2.11 
  23   1  -3   27.02    1.93 
  23   1  -3   27.59    1.64 
 -23   1   3   25.24    2.16 
  23   1  -3   26.46    1.93 
  23   1  -3   27.86    2.00 
  23   1  -3   29.92    2.10 
 -23   1   3   26.66    1.62 
 -23   1   3   31.68    2.34 
 -23   1   3   29.28    2.00 
  23   1  -3   31.64    2.02 
  23   1  -3   30.87    2.05 
  21  -1  -3   20.86    1.47 
  21  -1  -3   18.61    1.47 
 -21  -1   3   19.44    1.70 
 -21  -1   3   17.88    1.47 
  21  -1  -3   19.31    1.79 
  21  -1  -3   19.78    1.62 
 -21  -1   3   19.27    1.49 
 -21  -1   3   17.87    1.76 
  21  -1  -3   17.73    1.36 
  21  -1  -3   19.53    1.65 
  21  -1  -3   17.69    1.73 
  21   1  -3   16.93    1.60 
  21   1  -3   17.76    1.28 
  21   1  -3   18.14    1.62 
  21   1  -3   18.53    1.62 
 -21   1   3   18.96    1.30 
  21   1  -3   19.03    1.64 
 -21   1   3   18.01    1.55 
  21   1  -3   16.24    1.47 
  21   1  -3   19.17    1.72 
 -21   1   3   16.43    1.78 
 -21   1   3   18.55    1.83 
  19  -1  -3    3.89    0.80 
 -19  -1   3    4.05    0.90 
  19  -1  -3    4.67    0.85 
  19  -1  -3    5.10    0.99 
 -19  -1   3    4.18    1.00 
  19  -1  -3    3.88    0.73 
  19  -1  -3    3.13    0.72 
  19  -1  -3    4.77    0.92 
  19  -1  -3    4.63    0.78 
 -19  -1   3    4.19    0.79 
 -19  -1   3    3.93    0.76 
  19   1  -3    4.47    0.84 
  19   1  -3    3.14    0.69 
  19   1  -3    4.41    0.91 
 -19   1   3    2.44    0.90 
 -19   1   3    2.64    0.71 
  19   1  -3    3.51    0.85 
  19   1  -3    3.88    0.88 
 -19   1   3    5.22    0.78 
  19   1  -3    3.72    0.81 
 -19   1   3    3.63    1.00 
  19   1  -3    3.82    0.81 
 -17  -1   3   20.25    1.43 
  17  -1  -3   21.14    1.32 
  17  -1  -3   20.62    1.22 
  17  -1  -3   20.31    1.18 
  17  -1  -3   19.49    1.36 
 -17  -1   3   20.99    1.19 
  17  -1  -3   22.35    1.48 
 -17  -1   3   16.15    1.14 
  17  -1  -3   23.63    1.49 
  17  -1  -3   18.58    1.08 
 -17  -1   3   19.96    1.34 
 -17   1   3   21.41    1.12 
  17   1  -3   21.02    1.10 
  17   1  -3   22.50    1.38 
 -17   1   3   21.69    1.33 
  17   1  -3   19.98    1.30 
  17   1  -3   20.43    1.26 
  17   1  -3   20.72    1.37 
 -17   1   3   21.26    1.53 
 -17   1   3   20.23    1.47 
  17   1  -3   19.72    1.26 
  15  -1  -3   21.42    1.30 
 -15  -1   3   22.00    1.11 
  15  -1  -3   20.68    1.31 
  15  -1  -3   21.35    1.21 
  15  -1  -3   19.61    1.08 
  15  -1  -3   21.28    1.10 
 -15  -1   3   20.61    1.07 
 -15  -1   3   22.97    1.25 
 -15  -1   3   21.61    1.23 
  15  -1  -3   20.65    1.23 
  15   1  -3   23.84    1.30 
  15   1  -3   20.34    1.11 
  15   1  -3   21.36    1.15 
  15   1  -3   21.48    1.02 
  15   1  -3   19.78    1.16 
 -15   1   3   21.40    1.40 
  15   1  -3   19.76    1.20 
 -15   1   3   20.47    1.20 
 -15   1   3   22.65    1.03 
 -15   1   3   21.52    1.35 
  13  -1  -3   74.64    2.12 
 -13  -1   3   74.50    2.10 
 -13  -1   3   76.21    1.93 
 -13  -1   3   76.33    1.98 
  13  -1  -3   75.58    2.25 
  13  -1  -3   76.28    2.05 
  13  -1  -3   72.74    1.89 
 -13  -1   3   76.38    1.99 
  13  -1  -3   75.39    2.04 
  13  -1  -3   75.14    2.15 
 -13   1   3   76.30    2.34 
  13   1  -3   75.87    2.11 
  13   1  -3   75.53    1.91 
  13   1  -3   72.97    2.00 
  13   1  -3   73.16    1.88 
 -13   1   3   76.81    2.14 
 -13   1   3   74.82    2.18 
  13   1  -3   73.25    1.97 
 -13   1   3   75.43    1.93 
  13   1  -3   75.58    2.12 
 -11  -1   3   17.72    0.90 
 -11  -1   3   16.44    0.80 
  11  -1  -3   17.54    0.89 
  11  -1  -3   17.25    1.03 
  11  -1  -3   16.44    0.94 
 -11  -1   3   17.64    0.82 
 -11  -1   3   18.39    0.96 
  11  -1  -3   17.06    0.83 
  11  -1  -3   16.82    0.97 
 -11   1   3   17.50    1.00 
  11   1  -3   16.36    0.92 
 -11   1   3   16.55    0.81 
 -11   1   3   16.36    1.05 
  11   1  -3   16.91    0.92 
 -11   1   3   16.32    0.92 
  11   1  -3   16.78    0.77 
 -11   1   3   16.59    0.82 
  11   1  -3   17.23    0.89 
  11   1  -3   18.15    0.82 
  11   1  -3   17.83    0.84 
   9  -1  -3   29.07    1.12 
  -9  -1   3   29.25    0.96 
  -9  -1   3   31.51    0.94 
   9  -1  -3   26.80    1.14 
   9  -1  -3   29.61    1.13 
  -9  -1   3   29.79    1.03 
   9  -1  -3   29.43    0.97 
  -9  -1   3   30.40    0.95 
   9   1  -3   30.98    1.01 
  -9   1   3   28.82    1.23 
   9   1  -3   29.23    1.08 
  -9   1   3   30.22    1.01 
  -9   1   3   30.56    1.19 
   9   1  -3   29.24    0.93 
   9   1  -3   30.68    0.96 
  -9   1   3   29.61    1.10 
  -9   1   3   28.92    0.96 
   9   1  -3   28.37    0.91 
   7  -1  -3   10.87    0.70 
  -7  -1   3   10.67    0.55 
  -7  -1   3   11.12    0.52 
   7  -1  -3   11.34    0.62 
   7  -1  -3   11.14    0.75 
   7  -1  -3   10.47    0.58 
  -7  -1   3   10.92    0.51 
  -7  -1   3   11.62    0.68 
   7  -1  -3   11.09    0.66 
   7  -1  -3   11.16    0.69 
  -7  -1   3   11.47    0.61 
  -7   1   3   11.50    0.67 
   7   1  -3   11.11    0.57 
   7   1  -3   10.30    0.50 
  -7   1   3   10.51    0.74 
  -7   1   3   11.24    0.77 
   7   1  -3   10.52    0.63 
   7   1  -3   11.10    0.54 
  -7   1   3   10.93    0.60 
   7   1  -3   10.95    0.53 
  -7   1   3   11.02    0.56 
   5  -1  -3  299.54    5.16 
  -5  -1   3  313.71    5.05 
   5  -1  -3  295.77    5.32 
  -5  -1   3  306.89    4.96 
   5  -1  -3  305.50    5.01 
  -5  -1   3  300.49    5.10 
   5  -1  -3  305.81    5.27 
   5   1  -3  299.71    4.92 
   5   1  -3  293.11    5.09 
  -5   1   3  304.04    5.35 
   5   1  -3  299.95    4.93 
   5   1  -3  302.85    4.98 
  -5   1   3  301.37    5.35 
  -5   1   3  302.60    5.00 
  -5   1   3  299.59    5.16 
  -5   1   3  299.78    5.03 
  -5   1   3  302.81    5.25 
   5   1  -3  303.53    4.83 
   5   1  -3  319.02    5.02 
  -3  -1   3   49.58    1.12 
  -3  -1   3   53.82    1.10 
   3  -1  -3   52.38    1.32 
  -3  -1   3   49.34    1.20 
   3  -1  -3   53.77    1.24 
  -3  -1   3   54.39    1.11 
   3  -1  -3   50.68    1.33 
   3  -1  -3   51.37    1.38 
   3  -1  -3   50.79    1.21 
   3   1  -3   50.75    1.13 
   3   1  -3   50.20    1.29 
  -3   1   3   50.17    1.22 
   3   1  -3   51.80    1.09 
   3   1  -3   51.12    1.12 
  -3   1   3   52.80    1.32 
  -3   1   3   50.53    1.31 
   3   1  -3   51.65    1.22 
   3   1  -3   50.44    1.10 
  -3   1   3   51.66    1.21 
   1  -1  -3   16.53    0.75 
   1  -1  -3   16.80    0.69 
  -1  -1   3   16.57    0.57 
  -1  -1   3   16.41    0.60 
  -1  -1   3   16.58    0.61 
  -1  -1   3   16.96    0.73 
   1  -1  -3   16.54    0.71 
  -1  -1   3   17.07    0.60 
  -1  -1   3   16.10    0.57 
   1  -1  -3   16.28    0.71 
   1   1  -3   16.88    0.74 
  -1   1   3   16.83    0.71 
   1   1  -3   18.91    0.61 
   1   1  -3   17.13    0.59 
  -1   1   3   16.42    0.72 
   1   1  -3   16.69    0.59 
   1   1  -3   17.43    0.60 
  -1   1   3   16.54    0.67 
  -1   1   3   16.48    0.73 
  -1  -1  -3  222.46    4.00 
  -1  -1  -3  217.61    3.89 
   1  -1   3  219.86    3.93 
   1  -1   3  224.31    3.75 
  -1  -1  -3  226.35    4.04 
   1  -1   3  224.62    3.89 
  -1  -1  -3  226.24    3.64 
   1   1   3  222.66    3.64 
  -1   1  -3  223.61    3.74 
  -1   1  -3  218.16    3.85 
   1   1   3  216.68    3.96 
  -1   1  -3  225.21    3.82 
  -1   1  -3  216.75    3.91 
   1   1   3  217.56    3.99 
  -1   1  -3  220.93    3.79 
   1   1   3  235.06    4.02 
   1   1   3  215.19    3.87 
  -1   1  -3  222.81    3.91 
  -3  -1  -3  119.30    2.49 
   3  -1   3  116.28    2.23 
   3  -1   3  114.66    2.46 
   3  -1   3  115.48    2.39 
  -3  -1  -3  121.91    2.26 
  -3  -1  -3  116.45    2.40 
  -3  -1  -3  116.43    2.47 
   3  -1   3  114.92    2.45 
   3  -1   3  120.28    2.42 
  -3  -1  -3  118.95    2.56 
  -3   1  -3  118.06    2.46 
   3   1   3  117.19    2.23 
   3   1   3  117.73    2.46 
   3   1   3  116.77    2.48 
  -3   1  -3  119.25    2.49 
   3   1   3  116.28    2.40 
  -3   1  -3  120.01    2.43 
  -3   1  -3  116.65    2.37 
   5  -1   3   99.33    2.07 
  -5  -1  -3   97.38    2.27 
   5  -1   3   99.45    2.31 
   5  -1   3   96.99    2.23 
  -5  -1  -3   97.97    2.10 
   5  -1   3   98.66    2.29 
   5  -1   3   99.20    1.89 
  -5  -1  -3   97.61    2.21 
  -5  -1  -3   96.79    2.29 
   5  -1   3   96.76    2.23 
  -5  -1  -3  100.08    2.27 
   5   1   3  100.10    2.10 
   5   1   3   98.81    2.30 
  -5   1  -3  101.71    2.37 
   5   1   3   98.86    2.28 
  -5   1  -3   96.63    2.26 
  -5   1  -3   99.79    2.24 
   5   1   3  101.46    2.27 
  -5   1  -3  102.36    1.94 
   7  -1   3   47.24    1.54 
  -7  -1  -3   48.57    1.49 
   7  -1   3   49.71    1.55 
  -7  -1  -3   47.16    1.59 
   7  -1   3   46.88    1.19 
   7  -1   3   48.09    1.56 
  -7  -1  -3   48.97    1.62 
   7  -1   3   47.88    1.60 
  -7  -1  -3   49.64    1.57 
  -7  -1  -3   47.30    1.52 
  -7  -1  -3   47.01    1.44 
  -7   1  -3   45.84    1.62 
   7   1   3   49.04    1.55 
  -7   1  -3   48.41    1.57 
   7   1   3   47.90    1.43 
   7   1   3   47.33    1.50 
  -7   1  -3   50.04    1.18 
  -7   1  -3   49.94    1.55 
   7   1   3   48.27    1.56 
  -7   1  -3   48.40    1.25 
  -9  -1  -3   52.10    1.77 
   9  -1   3   52.61    1.38 
   9  -1   3   52.00    1.81 
   9  -1   3   54.25    1.75 
   9  -1   3   52.10    1.73 
  -9  -1  -3   51.90    1.71 
  -9  -1  -3   53.68    1.74 
  -9  -1  -3   53.51    1.81 
  -9  -1  -3   52.81    1.67 
   9  -1   3   55.84    1.78 
  -9   1  -3   51.22    1.74 
   9   1   3   52.98    1.77 
   9   1   3   52.19    1.71 
  -9   1  -3   52.46    1.73 
  -9   1  -3   52.89    1.45 
   9   1   3   52.93    1.70 
  -9   1  -3   52.41    1.34 
   9   1   3   54.51    1.67 
   9   1   3   50.89    1.64 
  -9   1  -3   52.48    1.88 
  11  -1   3    6.59    0.85 
  11  -1   3    5.82    0.84 
  11  -1   3    5.59    0.63 
 -11  -1  -3    6.84    0.85 
 -11  -1  -3    6.36    0.90 
  11  -1   3    6.30    0.86 
 -11  -1  -3    6.51    0.83 
 -11  -1  -3    7.00    0.91 
  11  -1   3    7.26    0.92 
 -11  -1  -3    6.27    0.83 
 -11  -1  -3    5.95    0.79 
 -11   1  -3    6.44    0.85 
 -11   1  -3    5.01    0.63 
 -11   1  -3    6.15    0.88 
  11   1   3    6.23    0.89 
  11   1   3    5.81    0.77 
  11   1   3    5.55    0.81 
 -11   1  -3    6.12    0.79 
 -11   1  -3    5.98    0.72 
  11   1   3    6.42    0.84 
  11   1   3    6.30    0.80 
 -13  -1  -3   93.17    2.71 
 -13  -1  -3   94.94    2.74 
 -13  -1  -3   95.40    2.91 
 -13  -1  -3   93.75    2.81 
  13  -1   3   96.44    2.92 
 -13  -1  -3   96.59    2.75 
  13  -1   3   97.07    2.79 
  13  -1   3   96.00    2.34 
 -13  -1  -3   98.86    2.77 
  13  -1   3   89.34    2.73 
 -13   1  -3   99.06    2.81 
 -13   1  -3   98.38    2.46 
  13   1   3   98.09    2.67 
  13   1   3   94.67    2.79 
 -13   1  -3   98.22    2.22 
  13   1   3   98.37    2.72 
 -13   1  -3   94.62    2.77 
 -13   1  -3  102.68    3.05 
  13   1   3   99.08    2.59 
  13   1   3   97.26    2.73 
  15  -1   3    6.71    1.11 
 -15  -1  -3    4.56    1.04 
  15  -1   3    3.34    0.65 
  15  -1   3    4.18    0.84 
 -15  -1  -3    4.31    0.89 
  15  -1   3    4.76    1.04 
 -15  -1  -3    5.43    0.94 
  15  -1   3    5.07    0.95 
 -15  -1  -3    3.96    1.04 
 -15  -1  -3    5.26    0.95 
  15   1   3    4.01    0.78 
 -15   1  -3    4.35    1.04 
  15   1   3    4.93    0.88 
  15   1   3    5.73    0.88 
  15   1   3    4.77    1.02 
 -15   1  -3    4.55    1.00 
 -15   1  -3    5.45    0.79 
 -15   1  -3    4.45    0.89 
  15   1   3    5.43    0.97 
  15   1   3    4.62    0.92 
 -15   1  -3    5.28    0.67 
 -17  -1  -3   41.60    2.26 
  17  -1   3   41.67    2.19 
  17  -1   3   40.12    1.68 
  17  -1   3   41.60    2.02 
 -17  -1  -3   40.66    2.02 
 -17  -1  -3   40.45    2.15 
  17  -1   3   41.11    2.31 
 -17  -1  -3   41.20    2.16 
  17  -1   3   44.26    2.39 
 -17  -1  -3   46.59    2.16 
  17   1   3   43.00    2.02 
  17   1   3   44.94    2.24 
 -17   1  -3   41.77    2.16 
  17   1   3   40.74    2.06 
  17   1   3   36.40    2.17 
 -17   1  -3   41.67    1.82 
 -17   1  -3   43.38    2.22 
  17   1   3   40.97    1.82 
 -17   1  -3   40.26    2.47 
  17   1   3   43.23    2.08 
 -17   1  -3   41.16    1.55 
  19  -1   3   19.26    1.41 
 -19  -1  -3   16.70    1.81 
  19  -1   3   19.30    2.06 
 -19  -1  -3   20.11    2.10 
 -19  -1  -3   18.12    2.00 
 -19  -1  -3   15.44    1.70 
  19  -1   3   15.97    1.94 
 -19  -1  -3   15.14    1.90 
  19  -1   3   15.64    1.73 
  19  -1   3   17.10    1.89 
 -19   1  -3   17.87    1.60 
  19   1   3   14.89    1.71 
 -19   1  -3   17.24    2.01 
 -19   1  -3   15.48    1.80 
 -19   1  -3   18.88    2.13 
  19   1   3   15.48    1.48 
  19   1   3   16.52    1.90 
  19   1   3   18.53    2.02 
  19   1   3   16.00    2.08 
  19   1   3   18.70    1.81 
 -21  -1  -3    8.99    1.39 
  21  -1   3    7.19    1.68 
 -21  -1  -3    6.72    1.44 
 -21  -1  -3    7.35    1.60 
  21  -1   3    9.04    1.64 
 -21  -1  -3    6.33    1.72 
 -21  -1  -3    9.32    1.60 
  21  -1   3   12.12    1.53 
  21  -1   3    9.16    1.57 
 -21   1  -3    6.65    1.27 
 -21   1  -3    7.72    1.53 
  21   1   3    8.28    1.20 
 -21   1  -3    9.14    1.63 
 -21   1  -3    9.78    1.92 
  21   1   3    8.41    1.46 
  21   1   3    9.14    1.57 
  21   1   3   10.28    1.75 
  21   1   3    9.93    1.57 
  23  -1   3   27.72    2.07 
 -23  -1  -3   28.39    2.86 
 -23  -1  -3   27.14    2.82 
 -23  -1  -3   28.34    2.82 
  23  -1   3   25.62    3.05 
  23  -1   3   20.87    2.43 
 -23  -1  -3   33.59    2.44 
 -23  -1  -3   28.81    2.70 
  23   1   3   29.01    2.48 
  23   1   3   26.59    2.05 
  23   1   3   27.21    2.66 
 -23   1  -3   26.65    2.33 
  23   1   3   26.46    3.09 
 -23   1  -3   30.20    3.12 
  23   1   3   29.91    2.46 
 -23   1  -3   22.51    2.63 
  25  -1   3   27.71    3.57 
  25  -1   3   27.95    3.57 
  25  -1   3   29.79    2.96 
 -25  -1  -3   26.46    2.73 
 -25  -1  -3   30.72    3.01 
 -25  -1  -3   29.00    3.33 
 -25  -1  -3   28.32    3.11 
 -25  -1  -3   32.42    3.42 
  25  -1   3   28.67    2.39 
  25   1   3   32.97    2.80 
 -25   1  -3   27.52    3.60 
  25   1   3   30.25    2.91 
  25   1   3   27.69    2.27 
 -25   1  -3   25.24    3.13 
  25   1   3   24.28    3.08 
 -25   1  -3   28.42    2.87 
  27  -1   3   20.23    2.26 
  27  -1   3   17.89    2.42 
 -27  -1  -3   19.82    2.88 
 -27  -1  -3   15.16    2.57 
 -27  -1  -3   16.91    2.76 
 -27   1  -3   17.44    3.15 
 -27   1  -3   16.35    2.78 
 -27   1  -3   14.68    2.28 
  27   1   3   22.86    2.70 
  27   1   3   16.21    2.03 
  29  -1   3    1.45    2.20 
  29  -1   3    1.38    1.98 
 -29  -1  -3   -3.63    3.04 
 -29  -1  -3   -1.21    2.60 
 -29  -1  -3    2.16    2.84 
 -29   1  -3    3.58    3.00 
  29   1   3    2.15    1.75 
 -29   1  -3    0.72    2.60 
  29   1   3   -3.33    2.27 
 -31  -1  -3    2.23    3.11 
 -31  -1  -3   -7.50    3.20 
  31  -1   3   -0.95    2.64 
  31  -1   3    9.60    2.56 
 -31   1  -3   -2.95    3.40 
 -31   1  -3    4.77    3.29 
  31   1   3    2.26    2.31 
  31   1   3    2.04    2.71 
  36  -2  -3    2.59    2.88 
 -36  -2   3    7.51    3.93 
  36  -2  -3   -1.50    3.04 
 -36  -2   3    1.63    3.51 
  36  -2  -3    7.45    3.04 
  36   2  -3    5.71    3.04 
  36   2  -3    2.76    3.22 
  36   2  -3    2.55    2.52 
 -36   2   3   -0.09    3.69 
 -36   2   3    0.95    3.85 
 -34  -2   3   10.27    3.17 
  34  -2  -3   11.18    2.84 
  34  -2  -3   11.13    2.73 
 -34  -2   3    6.89    3.23 
  34  -2  -3   13.51    2.79 
  34   2  -3   12.78    2.72 
  34   2  -3   13.71    2.34 
 -34   2   3   10.72    3.21 
  34   2  -3   10.00    2.83 
 -34   2   3    7.07    3.13 
 -32  -2   3    4.62    2.47 
  32  -2  -3    2.84    1.66 
 -32  -2   3   -1.67    2.51 
  32  -2  -3    1.49    2.08 
  32  -2  -3    5.57    2.23 
  32  -2  -3    3.86    2.03 
  32   2  -3    0.77    2.58 
  32   2  -3   -0.84    1.69 
  32   2  -3    2.15    2.09 
 -32   2   3    2.41    2.99 
 -32   2   3    1.86    2.51 
  32   2  -3    5.31    2.38 
  30  -2  -3    3.06    1.76 
  30  -2  -3    3.20    1.73 
  30  -2  -3   -1.30    1.34 
  30  -2  -3    4.60    1.73 
 -30  -2   3    5.73    2.10 
 -30  -2   3   -0.59    2.10 
  30  -2  -3   -0.26    2.25 
 -30   2   3    2.18    2.31 
 -30   2   3    2.56    2.20 
  30   2  -3    0.85    1.47 
  30   2  -3    0.40    2.00 
  30   2  -3    4.23    2.13 
  30   2  -3    0.37    1.76 
 -30   2   3    0.82    1.89 
  28  -2  -3    9.30    1.30 
  28  -2  -3    8.71    1.62 
  28  -2  -3   11.64    2.35 
  28  -2  -3    9.69    1.79 
  28  -2  -3    8.49    1.83 
 -28  -2   3    7.59    1.94 
 -28  -2   3    9.32    1.93 
  28   2  -3    8.16    1.47 
  28   2  -3    9.70    1.97 
  28   2  -3    9.69    1.79 
  28   2  -3    4.88    1.77 
 -28   2   3    7.50    2.25 
 -28   2   3    7.59    1.98 
 -28   2   3    6.87    1.50 
  28   2  -3   10.17    1.96 
  28   2  -3    6.26    1.75 
  26  -2  -3   16.78    1.67 
 -26  -2   3   12.44    1.86 
 -26  -2   3   13.08    1.54 
  26  -2  -3   16.25    2.04 
  26  -2  -3   13.05    1.91 
  26  -2  -3   17.26    2.25 
  26  -2  -3   10.29    1.81 
  26  -2  -3   15.13    2.13 
 -26  -2   3   13.03    1.88 
  26  -2  -3   14.50    1.83 
 -26   2   3   11.47    2.09 
 -26   2   3   14.22    2.08 
  26   2  -3   13.44    1.89 
  26   2  -3   13.02    1.89 
  26   2  -3   12.67    1.70 
 -26   2   3   17.53    1.99 
  26   2  -3   15.35    1.87 
 -26   2   3   12.62    1.51 
  26   2  -3   12.96    2.02 
  26   2  -3   13.33    1.78 
  26   2  -3   10.30    1.31 
  24  -2  -3   22.52    2.00 
  24  -2  -3   24.05    1.84 
  24  -2  -3   19.73    2.37 
 -24  -2   3   23.25    1.76 
 -24  -2   3   25.43    2.25 
  24  -2  -3   26.65    2.12 
  24  -2  -3   21.91    1.61 
  24  -2  -3   22.11    2.10 
  24  -2  -3   21.37    2.10 
 -24  -2   3   25.40    2.26 
  24   2  -3   23.86    1.70 
  24   2  -3   21.11    2.14 
  24   2  -3   22.70    1.96 
 -24   2   3   19.93    2.47 
  24   2  -3   25.79    2.20 
  24   2  -3   24.48    2.24 
 -24   2   3   25.90    2.41 
  24   2  -3   27.37    2.22 
  24   2  -3   24.44    2.16 
 -24   2   3   26.78    1.78 
 -24   2   3   24.07    2.28 
 -22  -2   3    4.89    0.95 
  22  -2  -3    6.29    1.05 
  22  -2  -3    6.92    1.24 
 -22  -2   3    4.93    1.24 
  22  -2  -3    6.65    1.26 
 -22  -2   3    4.92    1.17 
  22  -2  -3    4.25    1.20 
  22  -2  -3    7.68    0.93 
  22  -2  -3    6.00    1.14 
 -22  -2   3    4.39    1.06 
  22  -2  -3    7.80    1.15 
 -22   2   3    5.36    1.52 
 -22   2   3    5.67    1.19 
 -22   2   3    6.45    1.37 
  22   2  -3    6.46    1.31 
 -22   2   3    5.41    0.93 
  22   2  -3    6.63    1.12 
  22   2  -3    6.30    1.18 
  22   2  -3    5.86    1.24 
  22   2  -3    5.09    1.15 
  22   2  -3    4.20    0.95 
  22   2  -3    5.45    1.18 
  20  -2  -3   26.60    1.76 
  20  -2  -3   24.59    1.63 
 -20  -2   3   24.67    1.67 
 -20  -2   3   25.68    1.82 
  20  -2  -3   26.92    1.99 
  20  -2  -3   28.86    2.09 
 -20  -2   3   24.13    1.72 
  20  -2  -3   25.11    1.49 
  20  -2  -3   24.41    1.29 
  20  -2  -3   24.23    1.75 
 -20  -2   3   25.05    1.42 
  20   2  -3   25.02    1.54 
 -20   2   3   25.51    1.69 
  20   2  -3   27.87    1.89 
  20   2  -3   23.81    1.63 
  20   2  -3   24.48    1.52 
 -20   2   3   28.25    2.00 
 -20   2   3   23.93    2.11 
 -20   2   3   26.76    1.52 
  20   2  -3   25.54    1.70 
  20   2  -3   27.71    1.83 
  18  -2  -3    2.51    0.78 
  18  -2  -3    1.03    0.78 
 -18  -2   3    2.61    0.78 
  18  -2  -3    3.53    0.83 
  18  -2  -3    2.99    0.71 
  18  -2  -3    2.63    0.94 
 -18  -2   3    2.57    0.87 
  18  -2  -3    3.55    1.06 
 -18  -2   3    1.54    0.79 
 -18  -2   3    1.94    0.60 
 -18   2   3    2.31    0.98 
 -18   2   3    1.73    0.74 
  18   2  -3    1.37    0.72 
 -18   2   3    3.42    0.74 
  18   2  -3    2.95    0.74 
 -18   2   3    2.95    0.91 
  18   2  -3    2.19    0.69 
  18   2  -3    2.27    0.66 
  18   2  -3    3.96    0.95 
  18   2  -3    2.55    0.75 
 -16  -2   3   13.70    1.16 
  16  -2  -3   17.02    1.23 
 -16  -2   3   16.28    1.19 
  16  -2  -3   16.44    1.31 
  16  -2  -3   16.62    1.08 
  16  -2  -3   15.78    1.21 
  16  -2  -3   18.42    1.43 
 -16  -2   3   17.76    1.27 
  16  -2  -3   16.16    1.37 
 -16  -2   3   14.99    0.97 
 -16   2   3   13.70    1.20 
 -16   2   3   16.70    1.38 
  16   2  -3   18.17    1.16 
  16   2  -3   15.67    1.34 
  16   2  -3   15.24    1.29 
  16   2  -3   17.27    1.13 
 -16   2   3   15.70    1.50 
  16   2  -3   16.28    1.08 
 -16   2   3   13.97    1.04 
  16   2  -3   14.96    1.03 
 -14  -2   3   47.30    1.70 
  14  -2  -3   46.60    1.72 
 -14  -2   3   45.26    1.54 
 -14  -2   3   46.06    1.40 
  14  -2  -3   48.04    1.81 
 -14  -2   3   47.32    1.64 
  14  -2  -3   45.16    1.79 
  14  -2  -3   48.06    1.45 
  14  -2  -3   45.63    1.73 
  14  -2  -3   49.04    2.03 
  14  -2  -3   47.62    1.68 
  14   2  -3   45.66    1.82 
 -14   2   3   46.18    1.76 
 -14   2   3   48.02    1.60 
 -14   2   3   49.90    2.05 
  14   2  -3   46.64    1.46 
  14   2  -3   46.83    1.78 
  14   2  -3   47.56    1.55 
  14   2  -3   46.94    1.54 
 -14   2   3   46.39    1.87 
  14   2  -3   47.63    1.48 
  12  -2  -3   25.46    1.41 
 -12  -2   3   23.00    1.06 
 -12  -2   3   24.16    1.01 
  12  -2  -3   23.46    1.17 
  12  -2  -3   23.79    1.27 
  12  -2  -3   24.22    1.12 
  12  -2  -3   23.83    1.22 
 -12  -2   3   25.45    1.18 
 -12  -2   3   23.41    0.89 
  12  -2  -3   23.00    1.28 
  12  -2  -3   24.83    1.02 
  12   2  -3   25.49    1.32 
  12   2  -3   25.40    0.97 
  12   2  -3   26.20    1.01 
 -12   2   3   24.56    1.21 
 -12   2   3   25.03    1.47 
 -12   2   3   25.06    1.11 
  12   2  -3   25.61    0.97 
 -12   2   3   24.01    1.31 
 -12   2   3   23.80    0.97 
  12   2  -3   25.30    1.07 
  12   2  -3   25.69    1.27 
  10  -2  -3   42.17    1.56 
  10  -2  -3   44.32    1.24 
  10  -2  -3   43.94    1.34 
  10  -2  -3   45.54    1.55 
  10  -2  -3   43.84    1.57 
  10  -2  -3   42.83    1.67 
 -10  -2   3   45.41    1.45 
  10  -2  -3   43.49    1.56 
  10   2  -3   46.53    1.54 
  10   2  -3   47.31    1.37 
 -10   2   3   45.91    1.48 
 -10   2   3   45.89    1.72 
  10   2  -3   45.82    1.19 
  10   2  -3   45.31    1.23 
 -10   2   3   46.65    1.57 
  10   2  -3   46.46    1.64 
 -10   2   3   46.28    1.24 
 -10   2   3   45.70    1.61 
   8  -2  -3   26.88    0.91 
   8  -2  -3   25.96    1.16 
   8  -2  -3   27.40    1.15 
   8  -2  -3   26.64    1.23 
   8  -2  -3   27.71    0.88 
  -8  -2   3   27.95    1.05 
   8  -2  -3   29.14    1.20 
  -8   2   3   27.34    1.21 
   8   2  -3   27.05    1.10 
  -8   2   3   27.63    1.31 
  -8   2   3   26.00    1.13 
   8   2  -3   26.67    0.94 
   8   2  -3   28.36    1.22 
  -8   2   3   27.49    1.12 
  -8   2   3   26.69    1.12 
  -8   2   3   26.43    0.87 
   8   2  -3   28.14    1.11 
   6  -2  -3   46.00    1.48 
   6  -2  -3   45.70    1.51 
   6  -2  -3   45.32    1.43 
   6  -2  -3   45.23    1.43 
   6  -2  -3   44.89    1.16 
  -6  -2   3   47.13    1.30 
  -6   2   3   45.74    1.43 
  -6   2   3   45.44    1.15 
   6   2  -3   45.23    1.33 
   6   2  -3   45.69    1.19 
   6   2  -3   43.29    1.37 
  -6   2   3   44.19    1.43 
  -6   2   3   44.12    1.54 
  -6   2   3   44.78    1.45 
   6   2  -3   46.35    1.43 
  -6   2   3   46.87    1.44 
   4  -2  -3   26.34    1.02 
   4  -2  -3   28.39    1.13 
   4  -2  -3   27.60    1.11 
  -4  -2   3   28.08    1.05 
  -4  -2   3   25.90    0.90 
   4  -2  -3   27.42    1.04 
   4  -2  -3   27.60    0.88 
  -4   2   3   25.23    1.11 
   4   2  -3   25.97    0.98 
  -4   2   3   25.07    0.86 
  -4   2   3   25.58    1.01 
  -4   2   3   26.20    1.11 
   4   2  -3   25.76    1.03 
   4   2  -3   25.97    0.80 
   4   2  -3   24.82    0.90 
  -4   2   3   26.78    1.06 
   4   2  -3   25.89    1.02 
  -2  -2   3    2.74    0.35 
   2  -2  -3    2.64    0.44 
   2  -2  -3    2.14    0.44 
   2  -2  -3    2.14    0.47 
   2  -2  -3    2.70    0.51 
  -2  -2   3    2.70    0.45 
  -2  -2   3    2.36    0.44 
   2  -2  -3    2.46    0.45 
   2   2  -3    2.38    0.44 
   2   2  -3    3.63    0.46 
  -2   2   3    2.67    0.45 
  -2   2   3    2.65    0.42 
  -2   2   3    2.13    0.42 
   2   2  -3    2.47    0.47 
  -2   2   3    2.83    0.41 
   2   2  -3    3.70    0.46 
  -2   2   3    3.05    0.60 
   0  -2   3   48.28    1.14 
   0  -2  -3   48.52    1.51 
   0  -2  -3   49.61    1.40 
   0  -2   3   48.68    1.44 
   0  -2   3   49.89    1.15 
   0  -2   3   50.38    1.50 
   0  -2  -3   50.42    1.48 
   0  -2  -3   47.96    1.39 
   0   2   3   51.60    1.45 
   0   2   3   50.18    1.42 
   0   2  -3   49.26    1.22 
   0   2  -3   47.77    1.39 
   0   2   3   49.51    1.53 
   0   2  -3   47.40    1.41 
   0   2  -3   54.30    1.16 
   0   2   3   51.51    1.42 
   0   2   3   50.28    1.39 
   0   2  -3   52.31    1.26 
  -2  -2  -3    0.80    0.43 
  -2  -2  -3    0.19    0.31 
   2  -2   3    0.66    0.41 
  -2  -2  -3    0.11    0.35 
   2  -2   3    0.89    0.32 
  -2  -2  -3   -0.05    0.28 
   2  -2   3    0.66    0.25 
   2  -2   3    0.22    0.39 
   2  -2   3    0.24    0.26 
   2  -2   3    0.48    0.32 
   2   2   3    0.54    0.33 
  -2   2  -3    0.44    0.39 
   2   2   3    0.50    0.33 
  -2   2  -3    0.77    0.30 
  -2   2  -3    0.15    0.22 
   2   2   3    0.03    0.33 
  -2   2  -3    0.41    0.29 
   4  -2   3   23.14    1.01 
   4  -2   3   22.61    1.05 
  -4  -2  -3   23.47    1.02 
  -4  -2  -3   22.63    1.04 
   4  -2   3   24.09    0.74 
   4  -2   3   24.32    0.96 
   4  -2   3   23.35    1.01 
  -4  -2  -3   24.39    1.05 
   4  -2   3   24.55    1.13 
  -4  -2  -3   23.91    1.19 
  -4   2  -3   24.58    1.08 
   4   2   3   24.08    0.98 
  -4   2  -3   23.60    1.08 
   4   2   3   25.11    1.17 
   4   2   3   23.55    1.02 
  -4   2  -3   23.02    0.91 
  -4   2  -3   23.53    0.94 
   4   2   3   23.57    1.02 
   6  -2   3   97.41    2.42 
  -6  -2  -3   95.74    2.35 
   6  -2   3   99.99    2.35 
   6  -2   3   98.20    2.36 
   6  -2   3   97.73    1.94 
  -6  -2  -3   95.59    2.33 
  -6  -2  -3   96.49    2.61 
   6  -2   3   99.61    2.46 
  -6  -2  -3   99.53    2.31 
  -6  -2  -3   97.48    2.37 
   6  -2   3   97.91    2.06 
   6   2   3   92.85    2.55 
  -6   2  -3   95.72    1.92 
  -6   2  -3   95.01    2.30 
  -6   2  -3   93.64    2.30 
  -6   2  -3   97.01    2.49 
   6   2   3   95.17    2.07 
   6   2   3   94.86    2.30 
  -6   2  -3   94.84    2.40 
   6   2   3   97.08    2.36 
   6   2   3   94.17    2.53 
  -8  -2  -3   42.89    1.49 
   8  -2   3   42.44    1.64 
   8  -2   3   40.42    1.62 
   8  -2   3   41.02    1.58 
   8  -2   3   43.23    1.27 
   8  -2   3   42.77    1.23 
  -8  -2  -3   40.27    1.53 
   8  -2   3   41.25    1.54 
  -8  -2  -3   41.92    1.55 
  -8  -2  -3   41.36    1.55 
  -8  -2  -3   43.12    1.76 
  -8   2  -3   43.61    1.71 
   8   2   3   41.33    1.50 
  -8   2  -3   42.51    1.15 
   8   2   3   42.22    1.39 
  -8   2  -3   41.59    1.55 
   8   2   3   39.74    1.59 
   8   2   3   40.54    1.63 
  -8   2  -3   42.28    1.51 
  -8   2  -3   41.62    1.59 
  10  -2   3   15.99    0.89 
  10  -2   3   17.24    1.10 
 -10  -2  -3   15.00    1.16 
  10  -2   3   16.44    1.31 
  10  -2   3   17.40    1.27 
 -10  -2  -3   15.93    1.18 
 -10  -2  -3   17.07    1.20 
 -10  -2  -3   15.98    1.11 
  10  -2   3   17.76    0.94 
  10  -2   3   16.29    1.23 
 -10  -2  -3   16.08    1.28 
 -10   2  -3   16.40    1.34 
 -10   2  -3   15.39    1.07 
 -10   2  -3   15.73    1.20 
  10   2   3   14.86    1.05 
 -10   2  -3   14.51    0.80 
  10   2   3   14.96    1.08 
  10   2   3   15.69    1.14 
 -10   2  -3   16.12    1.15 
  10   2   3   16.00    1.16 
  10   2   3   16.57    1.20 
 -12  -2  -3  117.57    2.96 
 -12  -2  -3  119.64    3.19 
  12  -2   3  115.86    3.12 
 -12  -2  -3  118.61    3.31 
 -12  -2  -3  119.60    3.10 
  12  -2   3  114.37    2.69 
  12  -2   3  116.49    3.15 
 -12  -2  -3  118.79    2.99 
  12  -2   3  118.84    3.27 
  12  -2   3  122.50    3.18 
  12   2   3  119.49    3.01 
  12   2   3  110.05    3.15 
  12   2   3  114.57    3.06 
  12   2   3  112.08    3.01 
 -12   2  -3  115.97    3.12 
 -12   2  -3  114.47    2.61 
 -12   2  -3  112.61    3.11 
 -12   2  -3  116.64    3.41 
  12   2   3  119.27    2.93 
 -12   2  -3  115.93    3.05 
  14  -2   3   18.00    1.68 
  14  -2   3   17.28    1.66 
 -14  -2  -3   17.15    1.56 
 -14  -2  -3   17.69    1.43 
  14  -2   3   19.17    1.18 
 -14  -2  -3   17.83    1.56 
  14  -2   3   17.98    1.41 
 -14  -2  -3   18.89    1.55 
 -14  -2  -3   17.55    1.47 
  14  -2   3   16.92    1.50 
 -14   2  -3   17.24    1.71 
 -14   2  -3   16.53    1.13 
  14   2   3   16.84    1.32 
  14   2   3   18.80    1.50 
 -14   2  -3   17.11    1.45 
  14   2   3   17.82    1.37 
 -14   2  -3   16.08    1.51 
  14   2   3   15.45    1.39 
 -14   2  -3   19.23    1.44 
  14   2   3   19.36    1.57 
  16  -2   3    1.56    0.98 
  16  -2   3    1.82    0.76 
  16  -2   3    2.01    1.04 
  16  -2   3    2.84    0.84 
 -16  -2  -3    2.88    1.00 
 -16  -2  -3    2.68    0.91 
 -16  -2  -3    2.48    0.96 
  16  -2   3    2.71    1.07 
 -16  -2  -3    3.13    1.05 
 -16  -2  -3    1.99    0.94 
 -16   2  -3    1.40    0.96 
  16   2   3    1.48    0.78 
 -16   2  -3    1.89    0.77 
  16   2   3    2.18    0.96 
  16   2   3    1.61    0.94 
 -16   2  -3    2.64    0.88 
  16   2   3    1.75    0.82 
  16   2   3    2.41    0.97 
 -16   2  -3    2.28    1.27 
 -16   2  -3    2.22    0.89 
 -18  -2  -3   28.63    2.23 
  18  -2   3   28.77    1.67 
 -18  -2  -3   30.87    2.18 
  18  -2   3   26.41    2.46 
 -18  -2  -3   31.31    2.08 
  18  -2   3   26.01    2.02 
 -18  -2  -3   26.98    2.07 
  18  -2   3   29.15    2.00 
 -18  -2  -3   25.55    1.99 
  18  -2   3   28.02    2.28 
 -18   2  -3   28.25    2.11 
 -18   2  -3   28.50    1.97 
  18   2   3   29.95    1.86 
  18   2   3   27.37    2.04 
 -18   2  -3   26.04    2.33 
 -18   2  -3   29.15    2.12 
  18   2   3   29.65    2.10 
  18   2   3   25.79    2.06 
 -18   2  -3   30.08    1.72 
  18   2   3   26.59    1.93 
 -20  -2  -3    0.08    1.20 
  20  -2   3    3.01    1.08 
 -20  -2  -3    2.62    1.34 
 -20  -2  -3    1.80    1.32 
  20  -2   3    3.61    1.49 
  20  -2   3    3.71    1.61 
 -20  -2  -3    2.24    1.36 
  20  -2   3    1.97    1.09 
  20   2   3    2.52    1.33 
 -20   2  -3    3.26    1.28 
  20   2   3    2.00    1.15 
  20   2   3    1.12    1.49 
 -20   2  -3    1.99    1.34 
 -20   2  -3    2.88    1.15 
 -20   2  -3    0.73    1.20 
  20   2   3    1.96    1.24 
  20   2   3    2.45    1.11 
  22  -2   3    4.32    1.96 
  22  -2   3   -0.48    1.29 
 -22  -2  -3    7.37    1.63 
  22  -2   3    4.29    1.91 
  22  -2   3    5.05    1.30 
 -22  -2  -3    4.83    1.65 
 -22  -2  -3    3.52    1.48 
 -22  -2  -3    3.27    1.45 
 -22   2  -3    0.31    1.54 
  22   2   3    3.37    1.48 
  22   2   3    5.03    1.25 
 -22   2  -3   -0.18    1.44 
 -22   2  -3    4.04    1.27 
  22   2   3    3.54    1.32 
 -22   2  -3    2.76    1.72 
  22   2   3    3.62    1.56 
  24  -2   3    5.56    1.81 
 -24  -2  -3    7.77    2.09 
  24  -2   3    1.65    2.19 
  24  -2   3   10.31    1.69 
 -24  -2  -3    6.39    1.89 
 -24  -2  -3    8.29    2.02 
 -24  -2  -3    7.83    1.81 
  24   2   3    7.59    1.70 
 -24   2  -3    6.74    2.49 
 -24   2  -3    8.08    1.65 
  24   2   3    7.52    1.53 
  24   2   3    8.65    1.87 
  24   2   3    7.34    1.93 
 -24   2  -3    6.44    2.01 
 -26  -2  -3    0.46    2.44 
  26  -2   3    2.06    1.69 
 -26  -2  -3   -0.96    1.85 
  26  -2   3   -0.40    1.84 
 -26  -2  -3    2.24    2.31 
 -26  -2  -3   -0.95    2.11 
  26   2   3    3.22    1.83 
 -26   2  -3   -2.19    1.80 
 -26   2  -3    1.54    2.04 
 -26   2  -3    1.83    2.32 
  26   2   3   -0.59    1.53 
  28  -2   3    2.53    2.16 
 -28  -2  -3   -0.75    2.78 
  28  -2   3   -0.14    2.21 
 -28  -2  -3   -4.99    2.38 
 -28  -2  -3    3.84    2.71 
  28   2   3   -1.90    1.74 
 -28   2  -3    2.43    2.61 
 -28   2  -3    3.05    2.81 
  28   2   3    3.22    2.61 
  28   2   3    1.13    2.15 
 -30  -2  -3   -0.68    3.12 
  30  -2   3    6.63    2.74 
  30  -2   3   -0.03    2.55 
  30  -2   3    6.39    2.75 
 -30  -2  -3   -1.66    3.05 
 -30   2  -3    1.45    3.10 
 -30   2  -3   -0.94    3.45 
  30   2   3    1.76    2.21 
  30   2   3   -3.85    2.71 
  35  -3  -3    0.67    3.28 
  35  -3  -3    3.94    3.10 
 -35  -3   3   -0.67    3.46 
  35  -3  -3    2.87    2.93 
  35  -3  -3   -2.26    3.55 
  35   3  -3    3.12    2.52 
 -35   3   3    1.71    3.71 
 -35   3   3    3.16    3.60 
  35   3  -3   -2.17    3.17 
  33  -3  -3    5.26    2.85 
  33  -3  -3    6.49    2.49 
 -33  -3   3   -2.88    3.04 
  33  -3  -3    1.34    2.53 
 -33  -3   3    5.79    3.12 
  33  -3  -3    2.00    2.71 
  33   3  -3    7.41    2.55 
 -33   3   3   11.39    3.62 
  33   3  -3    6.80    2.85 
  33   3  -3    5.72    2.12 
 -33   3   3    5.33    3.03 
  31  -3  -3    2.13    2.19 
  31  -3  -3    4.32    2.53 
 -31  -3   3    5.20    2.53 
 -31  -3   3    1.32    2.56 
  31  -3  -3    2.87    2.03 
 -31  -3   3    6.29    2.35 
  31  -3  -3    1.62    2.31 
  31   3  -3    3.44    1.84 
 -31   3   3    6.17    2.64 
  31   3  -3    7.42    2.45 
  31   3  -3    4.07    2.14 
 -31   3   3    8.18    2.82 
  31   3  -3    3.67    2.42 
  29  -3  -3   -1.38    2.07 
  29  -3  -3    7.33    2.21 
  29  -3  -3    7.18    2.63 
 -29  -3   3    1.69    1.86 
  29  -3  -3    1.95    1.67 
  29  -3  -3    2.13    2.02 
 -29  -3   3    3.72    2.15 
 -29  -3   3   -0.35    1.97 
 -29   3   3    2.72    2.23 
  29   3  -3    0.87    2.17 
 -29   3   3    0.31    2.26 
  29   3  -3    1.75    1.49 
  29   3  -3    2.63    1.95 
  29   3  -3    2.19    1.73 
 -27  -3   3    3.48    1.79 
  27  -3  -3    1.67    1.43 
  27  -3  -3   -0.45    1.58 
  27  -3  -3    0.31    1.60 
  27  -3  -3    1.60    1.55 
 -27  -3   3    1.78    1.81 
  27  -3  -3    1.19    1.86 
 -27   3   3    2.32    1.40 
 -27   3   3    0.25    1.77 
  27   3  -3    0.92    1.30 
  27   3  -3   -0.28    1.80 
 -27   3   3    0.96    1.74 
 -27   3   3    0.08    1.91 
  27   3  -3    1.03    1.72 
  27   3  -3   -1.21    1.45 
  27   3  -3    0.04    1.87 
  27   3  -3    1.55    1.56 
  27   3  -3    1.05    1.75 
  25  -3  -3    3.19    1.58 
 -25  -3   3    2.39    1.52 
  25  -3  -3    1.36    1.69 
  25  -3  -3    1.82    1.53 
  25  -3  -3    2.77    1.71 
  25  -3  -3    3.41    1.57 
  25  -3  -3    5.66    1.37 
  25  -3  -3    2.94    1.18 
 -25  -3   3    3.19    1.48 
 -25   3   3    1.68    1.53 
 -25   3   3    2.78    1.27 
  25   3  -3    0.42    1.19 
  25   3  -3    1.57    1.16 
 -25   3   3    2.15    1.81 
  25   3  -3    3.02    1.51 
  25   3  -3    3.24    1.44 
  25   3  -3    0.22    1.55 
  25   3  -3    2.09    1.44 
  23  -3  -3    3.29    1.36 
  23  -3  -3    3.41    1.41 
  23  -3  -3    3.89    1.45 
  23  -3  -3    2.59    0.99 
 -23  -3   3    2.39    1.28 
 -23  -3   3    3.02    1.24 
  23  -3  -3    2.88    1.57 
  23  -3  -3    4.84    1.31 
  23  -3  -3    0.83    1.18 
 -23  -3   3    1.20    1.38 
  23   3  -3    0.97    1.02 
  23   3  -3    3.43    1.47 
 -23   3   3    3.06    1.34 
  23   3  -3    2.24    1.29 
  23   3  -3    1.60    0.97 
 -23   3   3    1.89    1.26 
  23   3  -3    2.25    1.19 
 -23   3   3    1.48    1.01 
  23   3  -3    2.35    1.21 
  23   3  -3    0.64    1.25 
 -23   3   3    0.46    1.45 
  21  -3  -3   14.30    1.42 
  21  -3  -3   11.54    1.47 
 -21  -3   3   14.30    1.75 
 -21  -3   3    9.75    1.31 
  21  -3  -3   11.85    1.62 
  21  -3  -3    9.91    1.78 
 -21  -3   3    9.78    1.56 
  21  -3  -3   10.79    1.42 
  21  -3  -3   12.77    1.54 
  21  -3  -3   10.68    1.38 
 -21   3   3   11.55    1.45 
 -21   3   3   10.02    1.29 
  21   3  -3    7.72    1.22 
  21   3  -3   12.19    1.73 
  21   3  -3   10.55    1.21 
  21   3  -3   11.00    1.54 
  21   3  -3   11.15    1.40 
 -21   3   3   12.27    1.71 
  21   3  -3   14.04    1.49 
 -21   3   3    8.16    1.64 
  19  -3  -3   24.88    1.84 
 -19  -3   3   27.76    1.72 
  19  -3  -3   21.64    1.83 
 -19  -3   3   23.38    1.90 
  19  -3  -3   24.47    2.14 
  19  -3  -3   23.83    1.74 
  19  -3  -3   22.56    1.99 
 -19  -3   3   23.88    1.63 
  19  -3  -3   26.04    1.46 
  19  -3  -3   21.98    1.81 
  19   3  -3   24.72    1.58 
  19   3  -3   27.05    1.98 
 -19   3   3   23.72    2.24 
  19   3  -3   21.53    1.54 
 -19   3   3   23.61    1.94 
 -19   3   3   21.67    1.57 
  19   3  -3   27.79    1.62 
 -19   3   3   25.67    1.81 
  19   3  -3   25.55    1.46 
 -17  -3   3   11.59    1.31 
  17  -3  -3   13.37    1.46 
  17  -3  -3   12.77    1.10 
  17  -3  -3   13.49    1.69 
  17  -3  -3   11.55    1.42 
 -17  -3   3   13.24    1.29 
  17  -3  -3   15.90    1.62 
  17  -3  -3   11.21    1.19 
 -17  -3   3   12.26    1.26 
  17  -3  -3   12.42    1.47 
 -17   3   3   14.32    1.28 
  17   3  -3   13.82    1.24 
  17   3  -3   13.20    1.19 
 -17   3   3   14.09    1.43 
  17   3  -3   11.55    1.15 
 -17   3   3   12.34    1.59 
 -17   3   3   14.24    1.83 
  17   3  -3   12.77    1.60 
  17   3  -3   12.42    1.06 
  15  -3  -3   22.63    1.74 
  15  -3  -3   23.58    1.63 
  15  -3  -3   26.53    1.72 
  15  -3  -3   25.92    1.13 
  15  -3  -3   25.37    1.46 
  15  -3  -3   25.44    1.62 
 -15  -3   3   27.12    1.35 
  15  -3  -3   25.34    1.56 
 -15  -3   3   27.00    1.65 
  15   3  -3   24.28    1.37 
  15   3  -3   25.33    1.15 
 -15   3   3   25.51    1.54 
 -15   3   3   27.52    1.42 
 -15   3   3   27.56    1.69 
  15   3  -3   28.04    1.71 
  15   3  -3   26.75    1.23 
 -15   3   3   26.91    1.86 
  13  -3  -3    6.19    0.71 
  13  -3  -3    7.94    1.08 
  13  -3  -3    7.77    1.00 
 -13  -3   3    6.66    0.98 
  13  -3  -3    7.11    0.96 
  13  -3  -3    6.66    0.92 
  13  -3  -3    8.96    1.14 
  13   3  -3    7.95    1.04 
 -13   3   3    9.39    1.02 
  13   3  -3    7.48    0.99 
  13   3  -3    6.74    0.88 
 -13   3   3    8.13    1.18 
 -13   3   3    7.10    0.91 
 -13   3   3    8.08    1.05 
  11  -3  -3    4.21    0.86 
  11  -3  -3    2.39    0.69 
  11  -3  -3    2.86    0.80 
  11  -3  -3    2.67    0.46 
  11  -3  -3    2.02    0.65 
  11  -3  -3    2.93    0.61 
  11   3  -3    2.24    0.80 
 -11   3   3    3.78    0.70 
 -11   3   3    3.84    0.86 
 -11   3   3    3.68    0.62 
  11   3  -3    2.65    0.64 
  11   3  -3    2.86    0.72 
  11   3  -3    3.31    0.81 
 -11   3   3    2.72    0.73 
 -11   3   3    2.98    0.47 
   9  -3  -3   38.86    1.10 
   9  -3  -3   40.99    1.61 
   9  -3  -3   38.65    1.72 
   9  -3  -3   39.62    1.69 
   9  -3  -3   43.15    1.61 
  -9   3   3   40.68    1.65 
  -9   3   3   43.28    1.70 
   9   3  -3   40.75    1.69 
   9   3  -3   40.41    1.54 
   9   3  -3   38.98    1.65 
  -9   3   3   39.98    1.10 
  -9   3   3   39.80    1.76 
  -9   3   3   42.15    1.62 
   9   3  -3   39.51    1.41 
  -9   3   3   40.82    1.55 
   7  -3  -3    7.62    0.85 
   7  -3  -3    6.68    0.85 
   7  -3  -3    6.21    0.72 
   7  -3  -3    5.92    0.90 
   7  -3  -3    6.06    0.57 
   7  -3  -3    5.45    0.72 
  -7   3   3    5.89    0.87 
   7   3  -3    7.49    0.99 
  -7   3   3    6.37    0.78 
  -7   3   3    7.61    0.92 
  -7   3   3    6.32    0.58 
   7   3  -3    6.53    0.78 
   7   3  -3    6.20    0.75 
   7   3  -3    6.47    0.71 
  -7   3   3    6.59    0.73 
   5  -3  -3   10.99    1.13 
   5  -3  -3   11.25    0.99 
   5  -3  -3   11.38    0.93 
  -5  -3   3   11.63    1.06 
   5  -3  -3   10.74    0.87 
   5  -3  -3   11.60    0.81 
   5   3  -3   10.97    0.79 
  -5   3   3   12.68    0.91 
   5   3  -3   11.71    0.97 
  -5   3   3   11.65    1.13 
  -5   3   3   11.05    0.70 
   5   3  -3   11.81    0.93 
   5   3  -3   10.79    1.09 
  -5   3   3   13.18    1.09 
   5   3  -3   11.10    0.80 
  -5   3   3   12.24    0.97 
   3  -3  -3    7.41    0.89 
   3  -3  -3    8.70    1.02 
  -3  -3   3    8.32    0.97 
   3  -3  -3    7.33    0.80 
   3  -3  -3    8.11    0.85 
   3  -3  -3    8.03    0.79 
   3   3  -3    7.91    0.69 
  -3   3   3    5.90    0.78 
   3   3  -3    7.39    0.83 
   3   3  -3    8.17    0.79 
   3   3  -3    8.11    1.04 
  -3   3   3    7.19    0.76 
  -3   3   3    7.56    0.66 
  -3   3   3    7.90    1.04 
  -3   3   3    9.02    0.83 
  -1  -3   3   29.16    1.26 
   1  -3  -3   29.77    1.31 
   1  -3  -3   33.25    1.48 
   1  -3  -3   31.12    1.32 
   1  -3  -3   32.07    1.19 
   1  -3  -3   32.11    1.25 
  -1  -3   3   30.94    1.43 
  -1   3   3   29.64    1.21 
  -1   3   3   30.62    1.49 
   1   3  -3   29.09    1.15 
   1   3  -3   31.30    1.27 
  -1   3   3   32.69    1.20 
   1   3  -3   28.82    1.39 
  -1   3   3   29.54    1.20 
  -1   3   3   30.02    1.25 
   1   3  -3   29.12    0.98 
  -1  -3  -3  110.68    2.48 
  -1  -3  -3  110.17    2.49 
   1  -3   3  114.09    2.64 
   1  -3   3  110.30    2.83 
  -1  -3  -3  110.78    2.64 
  -1  -3  -3  112.87    2.88 
  -1   3  -3  112.25    2.24 
   1   3   3  109.51    2.52 
  -1   3  -3  108.78    2.55 
   1   3   3  108.19    2.88 
  -1   3  -3  110.30    2.39 
  -1   3  -3  109.58    2.68 
  -1   3  -3  108.46    2.33 
   1   3   3  108.80    2.51 
   1   3   3  105.85    2.42 
   3  -3   3   95.53    2.18 
   3  -3   3   93.88    2.61 
  -3  -3  -3   91.66    2.24 
   3  -3   3   95.79    2.47 
  -3  -3  -3   93.50    2.69 
   3  -3   3   95.39    2.23 
   3  -3   3   97.78    2.18 
  -3  -3  -3   92.39    2.38 
  -3  -3  -3   94.57    2.31 
  -3   3  -3   98.84    2.16 
   3   3   3   97.18    2.64 
   3   3   3   92.71    2.20 
   3   3   3   93.73    2.28 
  -3   3  -3   98.68    2.31 
  -3   3  -3   99.21    2.04 
  -3   3  -3   96.34    2.05 
   3   3   3   95.16    2.32 
   3   3   3   96.07    2.72 
  -3   3  -3   96.57    2.17 
  -3   3  -3   97.30    2.41 
   5  -3   3    1.56    0.44 
  -5  -3  -3    1.26    0.52 
  -5  -3  -3    3.02    0.68 
   5  -3   3    2.55    0.57 
   5  -3   3    1.25    0.66 
  -5  -3  -3    2.26    0.68 
  -5  -3  -3    1.31    0.53 
   5  -3   3    2.20    0.62 
   5  -3   3    1.52    0.70 
  -5   3  -3    1.90    0.38 
  -5   3  -3    2.20    0.56 
   5   3   3    1.71    0.48 
   5   3   3    2.40    0.55 
  -5   3  -3    1.79    0.58 
  -5   3  -3    2.11    0.48 
  -5   3  -3    2.40    0.60 
   5   3   3    2.25    0.68 
   5   3   3    1.45    0.49 
   7  -3   3   14.28    1.17 
  -7  -3  -3   14.03    1.06 
  -7  -3  -3   11.92    1.02 
   7  -3   3   11.86    0.97 
   7  -3   3   13.63    1.11 
  -7  -3  -3   13.27    1.25 
   7  -3   3   11.90    1.26 
   7  -3   3   13.42    1.20 
  -7  -3  -3   13.53    1.01 
  -7  -3  -3   13.14    1.13 
  -7   3  -3   12.10    1.02 
  -7   3  -3   13.34    0.96 
  -7   3  -3   12.88    0.72 
   7   3   3    9.66    1.14 
   7   3   3   12.94    1.04 
  -7   3  -3   12.05    1.13 
   7   3   3   11.34    0.99 
   7   3   3   10.53    1.20 
   7   3   3   11.82    0.84 
  -7   3  -3   11.71    1.11 
  -9  -3  -3   14.22    1.19 
   9  -3   3   11.09    1.32 
   9  -3   3   13.58    1.10 
  -9  -3  -3   13.59    1.13 
   9  -3   3   13.51    1.24 
  -9  -3  -3   11.71    1.18 
  -9  -3  -3   10.99    1.35 
   9  -3   3   15.06    1.28 
   9  -3   3   13.33    1.29 
   9  -3   3   13.07    0.98 
  -9  -3  -3    9.79    0.98 
  -9   3  -3   13.39    1.27 
  -9   3  -3   12.82    1.18 
   9   3   3   12.48    1.27 
   9   3   3   13.55    1.12 
   9   3   3   10.93    0.97 
   9   3   3   11.80    1.24 
  -9   3  -3   12.81    1.28 
  -9   3  -3   11.91    0.77 
  -9   3  -3   12.34    1.02 
  11  -3   3   11.09    1.42 
 -11  -3  -3    6.82    0.88 
 -11  -3  -3    7.57    1.22 
  11  -3   3    9.37    1.04 
  11  -3   3    9.32    1.10 
 -11  -3  -3   10.30    1.28 
  11  -3   3    8.13    1.15 
 -11  -3  -3    7.47    0.96 
 -11  -3  -3    6.99    0.97 
  11  -3   3   12.26    1.33 
  11  -3   3    7.83    1.17 
 -11   3  -3    8.15    1.20 
  11   3   3    7.71    1.16 
 -11   3  -3    7.86    0.91 
  11   3   3    7.47    0.94 
 -11   3  -3    8.48    0.80 
 -11   3  -3    8.96    1.14 
  11   3   3    8.10    0.94 
  11   3   3    7.17    0.99 
 -11   3  -3    6.99    1.02 
  11   3   3    7.00    0.88 
  13  -3   3   12.20    0.97 
 -13  -3  -3   11.16    1.38 
  13  -3   3   13.65    1.55 
  13  -3   3   12.71    1.65 
  13  -3   3   11.70    1.20 
  13  -3   3   11.24    1.41 
  13  -3   3   11.96    1.48 
 -13  -3  -3   12.25    1.48 
 -13  -3  -3   10.94    1.19 
 -13  -3  -3   12.21    1.60 
  13  -3   3   10.85    1.35 
 -13  -3  -3   11.92    1.42 
 -13   3  -3   10.63    1.26 
  13   3   3   11.28    1.44 
  13   3   3   13.09    1.32 
 -13   3  -3   13.78    0.99 
  13   3   3   11.66    1.59 
 -13   3  -3   13.37    1.66 
  13   3   3   10.14    1.30 
 -13   3  -3   11.34    1.46 
  13   3   3   12.77    1.46 
 -13   3  -3    9.64    1.28 
  15  -3   3    1.81    1.11 
 -15  -3  -3    0.39    0.97 
  15  -3   3    1.23    1.12 
 -15  -3  -3    1.64    0.96 
 -15  -3  -3    0.86    0.92 
  15  -3   3    0.79    0.89 
 -15  -3  -3    1.10    0.98 
 -15  -3  -3    0.79    0.98 
  15  -3   3    0.94    1.13 
  15  -3   3    1.86    0.90 
  15  -3   3    2.67    0.73 
  15   3   3    1.07    0.98 
  15   3   3   -0.24    1.02 
  15   3   3    0.61    0.86 
 -15   3  -3   -0.43    0.86 
 -15   3  -3    1.51    1.13 
  15   3   3    1.33    0.93 
  15   3   3    0.30    0.94 
 -15   3  -3    0.75    1.04 
 -15   3  -3    0.18    0.95 
 -15   3  -3    0.99    0.64 
  17  -3   3   40.37    2.52 
 -17  -3  -3   39.97    2.32 
  17  -3   3   40.56    2.26 
 -17  -3  -3   40.85    2.42 
 -17  -3  -3   43.68    2.35 
  17  -3   3   40.21    2.04 
  17  -3   3   43.81    2.82 
  17  -3   3   42.54    1.81 
 -17  -3  -3   41.67    2.34 
 -17  -3  -3   42.33    2.63 
  17   3   3   43.85    2.58 
 -17   3  -3   42.88    1.81 
 -17   3  -3   42.66    2.43 
  17   3   3   40.10    2.22 
 -17   3  -3   43.05    2.81 
  17   3   3   43.36    2.16 
  17   3   3   45.88    2.32 
  17   3   3   43.51    2.36 
 -17   3  -3   38.29    2.48 
 -19  -3  -3    8.90    1.54 
 -19  -3  -3   10.24    1.70 
  19  -3   3   10.11    1.83 
 -19  -3  -3   16.26    2.06 
 -19  -3  -3   12.64    1.78 
  19  -3   3   13.43    2.11 
  19  -3   3    9.84    1.53 
 -19  -3  -3    7.39    1.56 
  19  -3   3    8.60    1.41 
  19  -3   3   12.41    1.33 
  19   3   3    8.63    1.42 
  19   3   3   11.72    1.57 
  19   3   3   10.79    1.68 
 -19   3  -3   12.12    1.73 
  19   3   3   10.79    1.61 
 -19   3  -3   10.69    1.93 
 -19   3  -3   12.21    1.76 
 -19   3  -3   11.67    1.35 
  19   3   3   10.55    1.62 
  21  -3   3    8.81    1.90 
 -21  -3  -3    5.92    1.70 
 -21  -3  -3    4.70    1.73 
  21  -3   3    9.17    1.37 
  21  -3   3    9.99    2.16 
  21  -3   3    5.75    1.51 
  21  -3   3    6.90    1.48 
 -21  -3  -3    5.59    1.79 
 -21  -3  -3    5.63    1.59 
 -21   3  -3    5.58    1.40 
  21   3   3    6.60    1.77 
 -21   3  -3    4.77    1.54 
 -21   3  -3    6.95    2.09 
  21   3   3    7.26    1.48 
  21   3   3    7.42    1.53 
  21   3   3    6.64    1.65 
 -21   3  -3    8.09    1.71 
 -21   3  -3   10.04    1.82 
 -23  -3  -3   12.37    2.11 
  23  -3   3   18.07    2.35 
  23  -3   3   12.39    1.89 
  23  -3   3   12.43    2.50 
  23  -3   3   15.07    2.18 
 -23  -3  -3   15.03    2.39 
 -23  -3  -3   16.11    2.24 
 -23  -3  -3   16.16    2.28 
 -23   3  -3   15.47    2.31 
 -23   3  -3   12.56    2.57 
  23   3   3   14.37    1.93 
  23   3   3   20.16    2.66 
 -23   3  -3   15.30    2.41 
  23   3   3   15.75    2.14 
 -23   3  -3   14.81    1.85 
 -25  -3  -3    0.35    2.13 
  25  -3   3    2.57    2.08 
  25  -3   3   -0.76    1.87 
  25  -3   3    4.01    2.79 
 -25  -3  -3   -1.90    2.11 
 -25  -3  -3    0.38    2.15 
  25  -3   3   -0.72    1.80 
  25  -3   3    0.97    1.76 
 -25  -3  -3   -0.17    2.09 
  25   3   3    1.71    1.61 
 -25   3  -3   -0.63    2.47 
 -25   3  -3    0.56    2.12 
 -25   3  -3   -0.90    1.81 
  25   3   3    2.18    1.86 
  25   3   3    2.29    2.23 
 -27  -3  -3   -1.99    2.67 
  27  -3   3    1.30    2.47 
  27  -3   3   -1.64    2.23 
 -27  -3  -3    7.06    2.71 
  27  -3   3    0.67    2.09 
 -27  -3  -3   -1.73    2.46 
 -27  -3  -3    0.46    2.29 
  27  -3   3    5.75    2.23 
 -27   3  -3   -0.19    2.18 
 -27   3  -3    4.10    2.62 
  27   3   3    3.06    2.08 
 -27   3  -3    1.24    2.80 
  27   3   3    0.56    2.23 
 -29  -3  -3    3.75    3.41 
  29  -3   3    0.00    2.58 
  29  -3   3   -5.73    2.62 
 -29  -3  -3    3.69    3.15 
  29  -3   3   -1.87    2.99 
 -29   3  -3    0.57    3.75 
  29   3   3    4.72    2.56 
 -29   3  -3    1.05    3.02 
  29   3   3    0.59    2.19 
  32  -4  -3   -2.43    3.16 
 -32  -4   3    1.63    3.01 
  32  -4  -3   -1.35    2.95 
  32  -4  -3    2.17    2.86 
  32   4  -3    2.18    2.34 
 -32   4   3    8.25    3.69 
 -32   4   3   -1.43    3.03 
  32   4  -3    2.17    2.84 
  30  -4  -3   -1.12    2.21 
 -30  -4   3    0.13    2.49 
  30  -4  -3   -0.69    2.38 
  30  -4  -3    2.85    2.77 
  30  -4  -3    0.96    1.89 
 -30  -4   3   -1.43    2.63 
 -30   4   3    1.50    2.94 
  30   4  -3    3.19    2.18 
  30   4  -3   -1.01    2.62 
  30   4  -3   -3.30    1.94 
 -30   4   3    2.86    2.68 
  28  -4  -3   11.48    2.62 
  28  -4  -3   12.45    3.21 
 -28  -4   3   11.15    2.31 
  28  -4  -3    6.95    2.14 
  28  -4  -3   10.35    1.85 
  28  -4  -3   10.51    2.38 
 -28   4   3   11.71    2.53 
  28   4  -3   10.09    2.43 
 -28   4   3    9.87    3.02 
  28   4  -3    6.66    1.85 
  28   4  -3   13.25    2.10 
 -26  -4   3    2.06    1.82 
  26  -4  -3    2.28    1.76 
  26  -4  -3    2.52    2.03 
 -26  -4   3    3.76    1.52 
  26  -4  -3    0.09    1.60 
 -26  -4   3    0.38    1.80 
  26  -4  -3    5.51    2.38 
  26  -4  -3    3.03    1.44 
  26   4  -3    3.75    1.80 
 -26   4   3    2.65    1.64 
 -26   4   3    4.31    2.04 
  26   4  -3    3.75    2.16 
  26   4  -3    0.01    1.53 
  26   4  -3   -0.56    1.94 
 -26   4   3    0.97    2.44 
  26   4  -3    0.88    1.55 
  24  -4  -3    0.06    1.75 
  24  -4  -3    3.97    1.57 
 -24  -4   3    5.30    1.37 
 -24  -4   3   -0.69    1.44 
  24  -4  -3   -2.87    1.65 
  24  -4  -3    5.11    1.77 
  24  -4  -3    3.56    2.07 
  24  -4  -3    0.09    1.68 
  24  -4  -3    1.39    1.16 
 -24  -4   3    1.37    1.52 
 -24   4   3    1.31    1.88 
 -24   4   3    0.82    1.73 
  24   4  -3   -0.33    1.23 
 -24   4   3    2.10    1.35 
  24   4  -3   -0.49    1.82 
  24   4  -3    1.63    1.37 
  24   4  -3    1.49    1.75 
  24   4  -3    4.13    1.69 
  24   4  -3    3.24    1.51 
  22  -4  -3    1.61    1.61 
  22  -4  -3    1.11    1.26 
  22  -4  -3   -0.12    1.65 
  22  -4  -3    2.16    1.48 
 -22  -4   3    1.42    1.13 
 -22  -4   3    0.81    1.29 
  22   4  -3    0.92    1.45 
 -22   4   3    1.67    1.63 
  22   4  -3   -1.17    0.98 
  22   4  -3    2.58    1.21 
 -22   4   3    1.58    1.41 
  22   4  -3    3.37    1.21 
 -22   4   3   -0.60    1.09 
  20  -4  -3    1.99    1.29 
  20  -4  -3    2.60    1.52 
  20  -4  -3    3.42    1.32 
  20  -4  -3    1.81    1.18 
 -20   4   3    2.98    1.40 
  20   4  -3    4.84    1.36 
  20   4  -3    3.49    1.07 
 -20   4   3    2.97    1.62 
 -20   4   3    2.04    1.10 
  20   4  -3    3.47    0.84 
  20   4  -3    2.73    1.04 
  18  -4  -3   37.23    2.45 
  18  -4  -3   37.05    2.13 
  18  -4  -3   34.13    2.23 
  18  -4  -3   29.85    2.43 
  18   4  -3   38.72    2.34 
 -18   4   3   38.19    2.01 
 -18   4   3   33.45    2.41 
  18   4  -3   37.64    1.61 
 -18   4   3   34.23    2.59 
  18   4  -3   34.99    1.71 
  18   4  -3   36.08    2.00 
 -18   4   3   36.13    2.30 
  16  -4  -3   41.13    1.98 
  16  -4  -3   43.71    2.43 
  16  -4  -3   44.34    2.34 
  16  -4  -3   42.11    2.41 
  16  -4  -3   41.42    2.20 
 -16   4   3   40.82    1.92 
  16   4  -3   42.60    2.02 
 -16   4   3   41.54    2.13 
  16   4  -3   40.95    2.35 
  16   4  -3   42.11    2.23 
  16   4  -3   42.93    2.39 
 -16   4   3   42.51    2.36 
 -16   4   3   41.19    2.56 
  14  -4  -3   25.20    1.85 
  14  -4  -3   26.76    1.77 
  14  -4  -3   23.36    1.99 
  14  -4  -3   25.61    1.18 
  14  -4  -3   25.18    1.94 
  14  -4  -3   23.81    1.54 
 -14   4   3   25.06    1.65 
 -14   4   3   22.36    2.07 
 -14   4   3   22.13    1.57 
  14   4  -3   25.03    2.08 
  14   4  -3   27.46    1.95 
 -14   4   3   24.96    1.94 
  14   4  -3   23.73    1.55 
  14   4  -3   25.98    1.77 
  12  -4  -3   36.36    1.85 
  12  -4  -3   34.67    1.86 
  12  -4  -3   40.72    1.46 
  12  -4  -3   37.82    2.14 
  12  -4  -3   42.52    2.16 
  12  -4  -3   38.88    1.57 
 -12   4   3   42.43    1.89 
 -12   4   3   38.89    2.22 
 -12   4   3   38.91    2.04 
  12   4  -3   39.04    2.04 
 -12   4   3   40.95    1.80 
  12   4  -3   40.79    1.93 
  12   4  -3   37.51    2.12 
  12   4  -3   39.91    1.75 
  10  -4  -3   36.02    1.76 
  10  -4  -3   35.87    1.45 
  10  -4  -3   35.16    2.01 
 -10  -4   3   34.37    1.80 
  10  -4  -3   35.47    1.93 
  10  -4  -3   36.73    1.75 
  10  -4  -3   33.66    1.39 
 -10   4   3   35.47    1.93 
  10   4  -3   37.05    1.63 
 -10   4   3   37.02    1.85 
  10   4  -3   35.48    1.88 
  10   4  -3   33.94    1.67 
 -10   4   3   36.40    1.65 
 -10   4   3   36.40    1.82 
  10   4  -3   34.36    1.97 
 -10   4   3   35.75    1.97 
   8  -4  -3   13.38    1.24 
   8  -4  -3   14.66    1.37 
   8  -4  -3   12.12    1.02 
   8  -4  -3   13.66    1.56 
   8  -4  -3   12.84    1.19 
   8   4  -3   11.42    1.27 
   8   4  -3   12.58    1.10 
  -8   4   3   12.47    1.10 
  -8   4   3   12.95    1.34 
  -8   4   3   12.05    1.47 
  -8   4   3   12.40    0.76 
   8   4  -3   11.48    1.08 
   8   4  -3   12.28    1.28 
  -8   4   3   10.80    1.43 
   8   4  -3   10.72    1.31 
  -8   4   3   11.12    1.26 
   6  -4  -3   18.55    1.16 
   6  -4  -3   20.14    1.65 
   6  -4  -3   18.75    1.27 
   6  -4  -3   18.70    1.26 
   6  -4  -3   17.81    1.35 
   6   4  -3   19.05    1.16 
   6   4  -3   18.26    1.41 
   6   4  -3   20.07    1.33 
  -6   4   3   20.57    1.38 
  -6   4   3   20.10    1.66 
   6   4  -3   20.03    1.65 
  -6   4   3   19.03    1.21 
  -6   4   3   21.98    1.48 
   6   4  -3   18.51    1.21 
  -6   4   3   18.56    0.96 
  -4  -4   3    2.56    0.84 
   4  -4  -3    2.59    0.65 
   4  -4  -3    1.21    0.72 
   4  -4  -3    2.23    0.69 
   4  -4  -3    1.84    0.61 
   4  -4  -3    1.51    0.83 
  -4   4   3    1.01    0.58 
   4   4  -3    2.86    0.93 
  -4   4   3    0.35    0.64 
  -4   4   3    0.73    0.74 
   4   4  -3    1.89    0.72 
  -4   4   3    1.71    0.96 
   4   4  -3    1.48    0.68 
  -4   4   3    1.30    0.51 
   4   4  -3    1.60    0.56 
   2  -4  -3    3.15    0.99 
   2  -4  -3    5.28    0.90 
   2  -4  -3    3.91    0.65 
  -2  -4   3    5.64    0.98 
   2  -4  -3    5.07    0.78 
   2  -4  -3    4.18    0.74 
  -2   4   3    4.97    0.74 
  -2   4   3    3.68    1.07 
   2   4  -3    4.50    0.74 
   2   4  -3    3.75    0.78 
  -2   4   3    3.41    0.66 
  -2   4   3    2.90    0.73 
   2   4  -3    4.08    0.60 
   2   4  -3    4.03    0.97 
  -2   4   3    4.72    0.68 
   0  -4  -3   18.47    1.15 
   0  -4  -3   17.39    1.35 
   0  -4   3   18.61    1.38 
   0  -4  -3   16.22    1.22 
   0  -4   3   18.92    1.50 
   0  -4  -3   17.07    1.20 
   0   4  -3   18.04    0.88 
   0   4   3   19.90    1.18 
   0   4   3   18.06    1.18 
   0   4   3   18.09    1.63 
   0   4  -3   19.34    1.26 
   0   4  -3   19.12    1.16 
   0   4   3   16.11    1.20 
   0   4  -3   18.47    1.55 
   0   4   3   19.19    1.21 
  -2  -4  -3   36.96    1.83 
   2  -4   3   37.81    1.72 
  -2  -4  -3   36.98    1.60 
  -2  -4  -3   36.43    1.40 
   2  -4   3   36.07    1.96 
  -2  -4  -3   37.55    1.56 
  -2   4  -3   33.65    1.79 
  -2   4  -3   34.85    1.61 
   2   4   3   35.46    1.95 
   2   4   3   39.14    1.48 
  -2   4  -3   34.49    1.20 
  -2   4  -3   35.90    1.39 
  -2   4  -3   33.32    1.36 
   2   4   3   37.51    1.40 
  -4  -4  -3    6.26    1.03 
   4  -4   3    7.02    0.82 
  -4  -4  -3    9.44    1.16 
   4  -4   3    7.59    0.98 
   4  -4   3    6.98    1.02 
  -4  -4  -3    5.68    0.86 
   4  -4   3    5.31    1.07 
  -4  -4  -3    5.07    0.72 
   4  -4   3    5.97    0.74 
   4   4   3    5.65    0.69 
   4   4   3    7.51    1.09 
  -4   4  -3    6.13    0.68 
   4   4   3    6.04    0.78 
   4   4   3    4.52    0.73 
  -4   4  -3    5.52    0.74 
  -4   4  -3    8.54    1.05 
  -4   4  -3    6.43    0.89 
  -4   4  -3    5.98    0.77 
  -4   4  -3    7.75    0.92 
   4   4   3    5.27    1.13 
  -6  -4  -3   11.92    1.10 
   6  -4   3   13.36    1.56 
   6  -4   3   15.86    1.29 
  -6  -4  -3   13.82    1.55 
   6  -4   3   12.50    1.63 
  -6  -4  -3   13.60    1.31 
  -6  -4  -3   13.98    1.32 
   6  -4   3   14.63    1.30 
   6  -4   3   14.48    1.16 
  -6   4  -3   12.26    1.05 
   6   4   3   14.71    1.21 
  -6   4  -3   12.62    0.94 
  -6   4  -3   11.35    1.34 
   6   4   3   14.27    1.16 
  -6   4  -3   12.59    1.38 
  -6   4  -3   15.37    1.20 
   6   4   3   12.94    1.67 
   6   4   3   13.95    1.42 
   8  -4   3    0.33    0.70 
   8  -4   3    1.77    0.83 
  -8  -4  -3   -0.18    0.68 
  -8  -4  -3    1.50    0.64 
   8  -4   3    1.45    0.78 
  -8  -4  -3    0.79    0.79 
  -8  -4  -3    0.36    0.78 
   8  -4   3    0.85    1.01 
  -8  -4  -3    0.80    0.87 
   8  -4   3    1.54    0.93 
   8   4   3    1.02    0.72 
  -8   4  -3    1.18    0.88 
   8   4   3    0.65    0.75 
  -8   4  -3    0.31    0.67 
  -8   4  -3    0.39    0.62 
   8   4   3    0.37    0.93 
  -8   4  -3    1.94    0.82 
   8   4   3   -1.11    0.98 
  -8   4  -3    0.04    0.84 
   8   4   3    0.85    0.83 
  10  -4   3   18.03    1.47 
 -10  -4  -3   19.62    1.48 
  10  -4   3   22.84    1.90 
 -10  -4  -3   22.69    1.62 
  10  -4   3   22.20    1.76 
 -10  -4  -3   18.02    1.59 
  10  -4   3   22.15    1.71 
  10  -4   3   17.51    1.83 
 -10  -4  -3   19.47    1.48 
 -10  -4  -3   14.63    1.72 
 -10   4  -3   17.01    1.12 
 -10   4  -3   16.18    1.35 
  10   4   3   16.64    1.51 
 -10   4  -3   18.13    1.62 
  10   4   3   17.97    1.74 
 -10   4  -3   18.53    1.73 
 -10   4  -3   19.47    1.84 
  10   4   3   16.98    1.81 
 -12  -4  -3   28.39    1.88 
 -12  -4  -3   21.98    1.67 
  12  -4   3   26.24    2.06 
 -12  -4  -3   24.45    2.09 
  12  -4   3   24.51    2.02 
  12  -4   3   24.84    1.94 
 -12  -4  -3   23.54    1.83 
  12  -4   3   24.54    1.74 
 -12  -4  -3   23.79    1.69 
  12  -4   3   21.67    2.16 
 -12   4  -3   24.28    1.64 
  12   4   3   25.92    2.08 
 -12   4  -3   23.60    1.30 
 -12   4  -3   25.75    2.20 
  12   4   3   25.38    1.87 
  12   4   3   26.78    1.67 
  12   4   3   25.17    1.76 
 -12   4  -3   23.50    1.86 
 -12   4  -3   24.34    1.93 
  12   4   3   22.66    1.52 
 -14  -4  -3   39.32    2.23 
  14  -4   3   39.72    2.61 
 -14  -4  -3   39.29    2.51 
  14  -4   3   39.80    2.50 
  14  -4   3   40.79    2.56 
 -14  -4  -3   34.06    2.20 
 -14  -4  -3   31.58    2.11 
 -14  -4  -3   36.68    2.06 
  14  -4   3   33.64    2.30 
  14  -4   3   38.14    2.19 
  14   4   3   35.07    2.21 
 -14   4  -3   34.83    2.02 
 -14   4  -3   38.30    2.26 
  14   4   3   36.42    1.90 
 -14   4  -3   35.92    1.60 
  14   4   3   31.87    1.91 
  14   4   3   37.41    2.10 
 -14   4  -3   36.95    2.34 
 -14   4  -3   36.06    2.64 
 -16  -4  -3   27.75    2.23 
  16  -4   3   29.51    2.26 
  16  -4   3   30.01    2.73 
  16  -4   3   29.68    2.44 
 -16  -4  -3   27.00    2.55 
 -16  -4  -3   29.96    2.34 
  16  -4   3   34.37    2.82 
 -16  -4  -3   29.41    2.42 
 -16  -4  -3   31.27    2.27 
  16   4   3   32.51    2.17 
  16   4   3   28.40    2.05 
  16   4   3   26.91    2.17 
 -16   4  -3   31.28    1.64 
  16   4   3   25.44    2.18 
 -16   4  -3   30.29    2.79 
 -16   4  -3   28.80    2.47 
  16   4   3   31.89    2.59 
 -16   4  -3   27.56    2.36 
  18  -4   3    9.31    1.61 
 -18  -4  -3    7.73    1.52 
  18  -4   3    8.95    1.99 
  18  -4   3    7.62    1.56 
 -18  -4  -3    6.86    1.64 
  18  -4   3   10.94    1.87 
 -18  -4  -3    7.52    1.53 
 -18  -4  -3    6.23    1.79 
  18  -4   3    4.71    2.08 
  18   4   3    8.00    1.62 
  18   4   3    9.24    1.46 
 -18   4  -3    5.10    1.13 
 -18   4  -3    8.41    2.08 
  18   4   3    7.31    1.58 
 -18   4  -3    4.42    1.60 
 -18   4  -3    8.99    1.59 
  18   4   3    6.52    1.45 
  20  -4   3   -0.67    1.47 
 -20  -4  -3   -0.73    1.70 
 -20  -4  -3    5.32    1.82 
  20  -4   3    2.45    1.42 
 -20  -4  -3    0.53    1.53 
  20  -4   3    6.12    2.22 
  20  -4   3    1.87    1.91 
 -20  -4  -3    3.45    1.64 
  20  -4   3   -4.23    2.08 
 -20  -4  -3    0.92    1.69 
 -20   4  -3   -0.97    1.18 
 -20   4  -3    3.34    1.78 
  20   4   3    2.01    1.67 
 -20   4  -3    0.52    1.69 
 -20   4  -3   -0.32    2.05 
  20   4   3    0.70    1.66 
  20   4   3    0.18    1.32 
  20   4   3    0.84    1.47 
  20   4   3    2.82    1.67 
  22  -4   3    4.87    2.59 
 -22  -4  -3    3.28    2.07 
 -22  -4  -3    0.05    1.87 
  22  -4   3   -0.83    1.81 
  22  -4   3   -0.35    1.97 
  22  -4   3    0.52    1.70 
 -22  -4  -3   -1.58    1.74 
 -22  -4  -3   -2.67    1.86 
 -22   4  -3    3.07    2.25 
  22   4   3    1.73    1.91 
 -22   4  -3    0.92    1.94 
  22   4   3   -1.56    1.60 
 -22   4  -3    0.55    1.49 
 -22   4  -3    0.71    2.30 
  22   4   3    2.88    1.68 
  24  -4   3    0.02    2.36 
 -24  -4  -3    1.26    2.19 
  24  -4   3    4.44    2.49 
 -24  -4  -3    0.99    2.32 
 -24  -4  -3    1.97    2.27 
 -24  -4  -3    1.92    2.26 
  24  -4   3    2.66    2.05 
  24  -4   3    1.50    1.52 
 -24   4  -3    1.40    2.29 
 -24   4  -3   -0.35    2.41 
 -24   4  -3   -1.04    2.65 
 -24   4  -3    1.03    1.92 
  24   4   3    5.12    1.93 
  24   4   3    1.89    1.89 
  24   4   3    4.71    2.33 
  26  -4   3    0.31    2.62 
  26  -4   3   -3.81    2.16 
  26  -4   3    2.37    2.49 
 -26  -4  -3    1.08    2.68 
  26  -4   3   -3.64    2.59 
 -26  -4  -3   -0.18    2.68 
 -26  -4  -3    2.86    2.72 
  26   4   3    0.99    2.24 
 -26   4  -3   -3.68    3.31 
 -26   4  -3    1.00    2.29 
 -26   4  -3   -2.67    2.64 
  26   4   3    3.01    2.25 
 -28  -4  -3   -1.78    3.10 
  28  -4   3    0.66    2.82 
  28  -4   3    1.74    3.24 
  28  -4   3   -2.75    2.90 
 -28  -4  -3    2.99    3.48 
 -28   4  -3    3.81    4.39 
 -28   4  -3    1.02    3.42 
  28   4   3    4.81    2.66 
  31  -5  -3    3.77    3.69 
  31  -5  -3   -3.88    3.03 
 -31  -5   3    2.58    3.14 
  31   5  -3    1.27    2.80 
  31   5  -3    2.46    3.31 
 -31   5   3    9.51    3.73 
 -31   5   3   -8.21    3.81 
 -29  -5   3   -1.85    2.60 
  29  -5  -3    6.11    3.21 
  29  -5  -3   -1.57    2.68 
  29   5  -3    0.45    3.05 
  29   5  -3   -4.32    2.25 
 -29   5   3    2.60    3.49 
 -29   5   3   -1.83    2.80 
  27  -5  -3    0.09    2.46 
  27  -5  -3    0.03    2.79 
  27   5  -3   -0.45    1.85 
  27   5  -3   -0.64    2.02 
 -27   5   3   -3.87    2.80 
 -27   5   3   -2.63    2.52 
  27   5  -3    0.99    2.52 
  25  -5  -3   -0.66    2.01 
  25  -5  -3    2.91    2.48 
  25  -5  -3    4.24    2.87 
  25   5  -3    2.67    2.24 
  25   5  -3   -0.26    2.21 
  25   5  -3   -1.79    1.40 
  25   5  -3    2.52    1.85 
 -25   5   3    0.93    2.27 
 -25   5   3    0.29    1.90 
  25   5  -3    4.34    1.85 
 -25   5   3   -5.08    2.45 
  23  -5  -3   10.38    2.54 
  23  -5  -3    7.14    1.93 
  23  -5  -3   11.63    2.45 
  23  -5  -3    5.53    2.12 
 -23   5   3    8.38    2.26 
  23   5  -3    6.01    1.64 
  23   5  -3    9.33    1.76 
 -23   5   3    7.92    2.64 
 -23   5   3    7.32    1.83 
  23   5  -3    7.53    2.21 
  23   5  -3    9.16    2.68 
  23   5  -3    9.02    2.16 
  21  -5  -3   12.19    2.32 
  21  -5  -3   12.23    2.06 
  21  -5  -3   14.45    2.33 
  21  -5  -3    9.96    1.91 
  21   5  -3   14.54    2.27 
 -21   5   3   12.99    2.58 
 -21   5   3   11.36    2.05 
  21   5  -3   13.52    2.59 
 -21   5   3   17.75    2.34 
  21   5  -3   12.66    1.75 
  19  -5  -3    0.62    1.72 
  19  -5  -3    1.05    1.48 
  19  -5  -3    3.83    1.85 
  19  -5  -3    1.15    1.47 
  19   5  -3    1.55    2.15 
 -19   5   3   -1.71    1.24 
  19   5  -3    1.74    1.52 
 -19   5   3    0.69    1.52 
 -19   5   3    2.66    1.42 
  19   5  -3    1.89    1.30 
 -19   5   3    0.26    1.78 
  17  -5  -3    6.20    1.71 
  17  -5  -3    2.12    1.68 
  17  -5  -3    3.53    1.44 
  17  -5  -3    1.85    1.28 
  17   5  -3    4.05    1.93 
 -17   5   3    3.37    1.23 
 -17   5   3    2.88    1.46 
  17   5  -3    3.62    1.50 
 -17   5   3    4.71    1.86 
  17   5  -3    0.53    1.38 
  17   5  -3    1.28    1.19 
 -17   5   3    1.31    1.20 
  15  -5  -3   18.32    2.28 
  15  -5  -3   18.64    2.40 
  15  -5  -3   17.71    2.10 
  15  -5  -3   26.73    2.34 
  15  -5  -3   17.86    1.94 
 -15   5   3   21.13    2.36 
 -15   5   3   17.46    1.91 
  15   5  -3   17.73    1.90 
 -15   5   3   26.01    2.69 
 -15   5   3   20.01    1.95 
  15   5  -3   17.32    2.26 
  15   5  -3   20.19    2.23 
  15   5  -3   19.71    2.22 
  13  -5  -3    7.61    1.61 
  13  -5  -3    6.24    1.38 
  13  -5  -3    6.02    1.25 
  13  -5  -3    5.31    1.35 
 -13   5   3    6.75    1.46 
 -13   5   3    4.48    1.20 
 -13   5   3    4.79    1.34 
  13   5  -3    3.89    1.30 
  13   5  -3    1.72    1.55 
  13   5  -3    5.77    1.18 
  13   5  -3    5.69    1.38 
 -13   5   3    8.12    1.27 
  11  -5  -3   18.00    1.80 
  11  -5  -3   16.71    2.03 
  11  -5  -3   19.74    1.47 
  11  -5  -3   22.15    2.25 
  11  -5  -3   18.45    1.86 
 -11   5   3   21.75    1.97 
  11   5  -3   21.90    2.42 
  11   5  -3   21.10    1.71 
  11   5  -3   18.55    1.77 
 -11   5   3   19.20    1.63 
  11   5  -3   18.94    1.81 
  11   5  -3   20.15    2.03 
 -11   5   3   21.33    2.24 
 -11   5   3   20.87    1.95 
 -11   5   3   19.55    2.15 
   9  -5  -3    0.09    1.03 
   9  -5  -3    1.39    0.83 
   9  -5  -3    1.45    1.29 
   9  -5  -3    1.02    0.96 
   9  -5  -3    1.03    1.01 
  -9   5   3    1.03    0.84 
   9   5  -3    1.66    0.92 
  -9   5   3    2.17    1.09 
  -9   5   3    0.56    1.16 
   9   5  -3    0.61    0.83 
   9   5  -3   -1.01    1.39 
   9   5  -3    4.01    1.02 
   9   5  -3    1.66    1.12 
  -9   5   3    0.36    1.16 
  -9   5   3    1.39    1.11 
   7  -5  -3    2.72    1.00 
   7  -5  -3    4.62    1.21 
   7  -5  -3    2.63    0.94 
   7  -5  -3    4.41    1.00 
   7  -5  -3    3.75    1.06 
  -7   5   3    2.31    0.85 
   7   5  -3    2.60    1.09 
   7   5  -3    3.82    1.45 
  -7   5   3    5.23    1.35 
  -7   5   3    4.80    1.05 
  -7   5   3    2.54    1.19 
   7   5  -3    2.93    0.98 
   7   5  -3    4.05    0.98 
   7   5  -3    3.53    0.92 
   5  -5  -3    3.28    0.95 
   5  -5  -3    3.01    0.98 
  -5  -5   3    4.17    1.27 
   5  -5  -3    5.70    1.33 
   5  -5  -3    3.84    0.97 
   5  -5  -3    4.80    1.03 
   5   5  -3    4.42    0.86 
   5   5  -3    3.81    1.03 
   5   5  -3    5.02    1.50 
  -5   5   3    2.83    0.69 
   5   5  -3    3.40    1.01 
  -5   5   3    2.42    0.82 
  -5   5   3    5.00    1.40 
   5   5  -3    4.12    1.10 
  -5   5   3    2.01    1.10 
  -5   5   3    3.50    0.97 
   3  -5  -3   15.56    1.48 
   3  -5  -3   17.73    1.34 
   3  -5  -3   17.30    1.61 
   3  -5  -3   17.19    1.97 
  -3  -5   3   22.10    2.12 
   3  -5  -3   18.11    1.51 
  -3   5   3   17.55    1.23 
   3   5  -3   17.10    1.98 
  -3   5   3   14.32    1.62 
  -3   5   3   16.89    1.46 
  -3   5   3   18.51    1.43 
   3   5  -3   18.27    1.55 
   3   5  -3   20.03    1.25 
  -3   5   3   17.94    1.95 
   3   5  -3   17.90    1.61 
   1  -5  -3   26.77    1.65 
   1  -5  -3   26.80    2.12 
  -1  -5   3   26.28    2.17 
   1  -5  -3   30.43    1.54 
   1  -5  -3   29.95    1.71 
   1  -5  -3   25.98    1.81 
  -1   5   3   27.52    1.67 
  -1   5   3   29.07    1.59 
  -1   5   3   28.93    1.62 
   1   5  -3   28.53    1.27 
   1   5  -3   30.47    2.31 
   1   5  -3   27.00    1.66 
  -1   5   3   30.60    1.62 
  -1   5   3   27.81    2.32 
   1   5  -3   30.23    1.73 
  -1  -5  -3   27.49    1.63 
  -1  -5  -3   31.94    2.03 
   1  -5   3   29.59    2.32 
   1  -5   3   32.36    1.99 
  -1  -5  -3   28.72    1.46 
   1   5   3   30.48    1.63 
   1   5   3   26.03    1.55 
   1   5   3   33.67    1.82 
  -1   5  -3   31.46    1.79 
  -1   5  -3   28.00    2.13 
   1   5   3   27.41    2.34 
  -1   5  -3   28.70    1.58 
  -3  -5  -3   52.69    2.54 
   3  -5   3   53.34    2.36 
   3  -5   3   58.53    2.80 
  -3  -5  -3   50.23    1.77 
  -3   5  -3   54.42    2.61 
  -3   5  -3   51.33    1.87 
  -3   5  -3   54.95    2.16 
  -3   5  -3   52.57    1.68 
  -3   5  -3   50.79    1.98 
  -3   5  -3   54.38    2.01 
   3   5   3   52.30    1.98 
   3   5   3   49.71    1.91 
   3   5   3   52.95    2.87 
   5  -5   3   29.96    1.58 
   5  -5   3   31.66    2.11 
  -5  -5  -3   30.36    1.80 
  -5  -5  -3   30.70    1.57 
  -5  -5  -3   31.88    2.17 
   5  -5   3   32.56    1.69 
   5  -5   3   33.34    2.34 
   5  -5   3   32.61    1.75 
  -5   5  -3   32.90    1.65 
   5   5   3   31.36    2.50 
  -5   5  -3   28.39    1.97 
  -5   5  -3   28.21    1.47 
   5   5   3   29.86    1.64 
  -5   5  -3   28.46    1.80 
   5   5   3   35.51    1.73 
   5   5   3   35.81    2.22 
  -7  -5  -3   27.50    1.87 
   7  -5   3   26.90    1.84 
   7  -5   3   30.49    1.88 
   7  -5   3   24.17    2.23 
  -7  -5  -3   23.71    2.11 
   7  -5   3   26.01    1.64 
   7  -5   3   28.81    2.36 
  -7   5  -3   28.30    2.06 
  -7   5  -3   26.68    1.82 
   7   5   3   28.36    1.75 
   7   5   3   24.08    1.56 
  -7   5  -3   26.99    1.93 
   7   5   3   27.47    2.11 
  -7   5  -3   24.32    1.48 
   7   5   3   28.29    2.55 
  -7   5  -3   25.24    1.54 
   7   5   3   25.84    2.09 
   9  -5   3    7.60    1.37 
  -9  -5  -3    5.69    1.19 
   9  -5   3    7.53    1.13 
  -9  -5  -3    5.70    1.09 
  -9  -5  -3    6.04    1.38 
   9  -5   3    7.30    1.61 
   9  -5   3    7.80    1.55 
   9  -5   3    6.97    1.27 
  -9   5  -3    7.53    1.44 
  -9   5  -3    5.03    1.00 
  -9   5  -3    7.04    1.36 
   9   5   3    6.89    1.36 
  -9   5  -3    4.24    0.90 
   9   5   3    6.86    1.45 
  -9   5  -3    6.90    1.19 
   9   5   3    7.61    1.22 
 -11  -5  -3   27.93    2.13 
  11  -5   3   26.66    2.64 
 -11  -5  -3   24.04    1.83 
 -11  -5  -3   21.30    2.06 
 -11  -5  -3   23.01    1.88 
  11  -5   3   23.94    2.21 
  11  -5   3   26.34    1.99 
  11  -5   3   27.97    2.35 
  11  -5   3   23.29    2.59 
 -11  -5  -3   27.41    2.46 
 -11   5  -3   21.34    1.85 
  11   5   3   22.06    2.32 
 -11   5  -3   28.53    2.29 
 -11   5  -3   22.09    2.17 
  11   5   3   22.45    1.94 
 -11   5  -3   26.07    2.63 
 -11   5  -3   24.88    1.54 
  13  -5   3   20.65    2.53 
  13  -5   3   22.90    2.10 
 -13  -5  -3   19.42    2.21 
  13  -5   3   22.92    2.55 
  13  -5   3   26.04    2.64 
 -13  -5  -3   17.10    2.00 
 -13  -5  -3   20.69    2.23 
 -13  -5  -3   21.93    2.56 
 -13  -5  -3   20.71    1.94 
  13  -5   3   21.50    2.27 
 -13   5  -3   22.30    2.35 
 -13   5  -3   20.89    1.98 
 -13   5  -3   22.62    2.41 
 -13   5  -3   20.91    1.60 
  13   5   3   22.61    1.84 
  13   5   3   19.94    2.07 
 -13   5  -3   17.62    1.87 
  13   5   3   19.03    2.22 
 -15  -5  -3    0.88    1.48 
 -15  -5  -3    0.71    1.33 
  15  -5   3    2.60    1.83 
 -15  -5  -3    1.42    1.38 
  15  -5   3    2.04    1.42 
 -15  -5  -3    0.46    1.63 
  15  -5   3    3.25    2.00 
 -15  -5  -3   -0.56    1.49 
  15  -5   3    2.78    1.87 
  15   5   3    0.60    1.13 
  15   5   3    0.72    1.48 
 -15   5  -3    3.69    1.67 
  15   5   3    1.71    1.26 
 -15   5  -3    1.65    1.45 
  15   5   3    3.02    1.59 
 -15   5  -3   -0.09    1.80 
 -15   5  -3    1.40    1.06 
 -15   5  -3    1.22    1.40 
 -17  -5  -3   10.82    1.77 
  17  -5   3    9.90    1.78 
 -17  -5  -3   10.09    1.88 
 -17  -5  -3    8.54    1.78 
 -17  -5  -3    8.32    2.16 
  17  -5   3   10.53    2.29 
  17  -5   3   13.51    2.35 
  17   5   3   10.93    1.93 
  17   5   3    9.09    1.86 
  17   5   3   10.20    1.55 
  17   5   3    8.70    1.64 
 -17   5  -3    6.36    1.80 
 -17   5  -3   10.43    1.98 
 -17   5  -3   10.35    2.46 
 -17   5  -3   10.37    1.39 
  19  -5   3    8.76    2.83 
  19  -5   3   13.55    2.66 
 -19  -5  -3   12.62    2.27 
  19  -5   3    9.14    2.24 
 -19  -5  -3    9.30    2.30 
 -19  -5  -3   11.27    1.89 
 -19  -5  -3    6.80    2.05 
  19  -5   3   12.57    2.04 
 -19  -5  -3    7.55    2.08 
 -19   5  -3    5.90    2.08 
  19   5   3    9.95    2.15 
  19   5   3    9.14    2.02 
 -19   5  -3    8.82    1.46 
 -19   5  -3   16.69    2.45 
  19   5   3    8.32    1.71 
 -19   5  -3   10.53    2.78 
  19   5   3   11.75    1.96 
  21  -5   3    7.64    2.30 
  21  -5   3    6.76    2.71 
 -21  -5  -3    6.85    2.27 
 -21  -5  -3    4.66    2.47 
  21  -5   3    8.61    2.98 
 -21  -5  -3   -0.45    1.97 
  21   5   3    6.24    1.92 
 -21   5  -3    6.54    2.45 
 -21   5  -3    2.92    1.69 
  21   5   3    7.00    2.13 
 -21   5  -3    1.02    2.37 
 -21   5  -3    6.41    2.87 
  21   5   3    4.32    2.03 
  23  -5   3    3.45    3.22 
 -23  -5  -3   -0.42    2.39 
 -23  -5  -3    0.79    2.70 
  23  -5   3    2.15    2.43 
  23  -5   3    3.95    2.93 
 -23  -5  -3    0.18    2.52 
  23   5   3    2.75    2.10 
  23   5   3    2.54    2.48 
 -23   5  -3    1.76    1.93 
  23   5   3    2.27    2.26 
 -23   5  -3    0.16    2.65 
 -23   5  -3   -0.08    2.71 
 -23   5  -3    2.13    3.38 
  25  -5   3   -2.47    3.32 
 -25  -5  -3    3.02    3.01 
 -25  -5  -3    2.55    2.95 
  25  -5   3   -1.40    2.69 
 -25   5  -3   -5.03    3.03 
  25   5   3   -1.85    2.36 
 -25   5  -3    5.71    3.69 
  28  -6  -3    7.17    3.42 
  28  -6  -3   11.34    4.20 
  28   6  -3    3.72    2.91 
  28   6  -3    6.48    3.69 
 -28   6   3   12.33    4.56 
 -28   6   3    1.63    3.75 
  26  -6  -3    3.61    3.02 
  26  -6  -3    0.81    3.59 
 -26   6   3   -0.29    3.05 
  26   6  -3    5.89    2.46 
 -26   6   3    2.62    3.89 
  26   6  -3    4.19    2.88 
  24  -6  -3    1.48    3.00 
  24  -6  -3    3.33    2.58 
  24  -6  -3    4.05    3.23 
  24   6  -3    2.38    2.69 
 -24   6   3   -1.04    2.71 
  24   6  -3    3.08    2.20 
  24   6  -3    1.09    2.47 
 -24   6   3   -1.39    3.25 
  22  -6  -3    1.88    2.79 
  22  -6  -3   -1.86    2.18 
  22  -6  -3    1.16    2.72 
  22  -6  -3   -2.83    2.57 
  22   6  -3   -0.53    1.89 
 -22   6   3    2.34    2.54 
  22   6  -3   -1.50    2.28 
  22   6  -3    5.62    2.40 
 -22   6   3    0.28    2.71 
  20  -6  -3    7.13    2.32 
  20  -6  -3    3.31    2.00 
  20  -6  -3    2.37    2.49 
  20  -6  -3    1.19    2.33 
  20   6  -3   -1.82    1.94 
 -20   6   3    4.51    2.39 
  20   6  -3    2.43    1.80 
 -20   6   3    1.46    2.03 
 -20   6   3    6.75    2.74 
  18  -6  -3   -1.31    2.03 
  18  -6  -3   -1.99    1.89 
  18  -6  -3    1.85    1.74 
  18  -6  -3    0.22    2.10 
  18   6  -3   -0.69    1.80 
 -18   6   3    4.85    1.97 
 -18   6   3    2.35    2.21 
  18   6  -3    0.80    1.59 
 -18   6   3   -1.21    1.60 
  18   6  -3   -1.46    2.58 
  16  -6  -3    2.84    1.61 
  16  -6  -3    2.02    1.89 
  16  -6  -3    0.53    1.81 
  16  -6  -3   -0.59    1.99 
  16  -6  -3    2.15    1.68 
  16   6  -3    2.90    1.80 
  16   6  -3    0.84    2.05 
  16   6  -3    1.17    1.59 
 -16   6   3    1.77    1.55 
 -16   6   3    3.07    2.14 
 -16   6   3   -0.54    1.60 
  16   6  -3    1.23    1.59 
 -16   6   3    1.44    1.87 
  16   6  -3    1.44    2.44 
  14  -6  -3    2.35    1.52 
  14  -6  -3    3.19    1.74 
  14  -6  -3    4.54    1.94 
  14  -6  -3    2.94    1.04 
 -14   6   3    3.97    1.62 
  14   6  -3    0.91    2.27 
 -14   6   3    4.92    2.01 
  14   6  -3    2.91    1.66 
 -14   6   3    4.44    1.51 
 -14   6   3    3.61    1.73 
  14   6  -3    3.70    1.45 
  14   6  -3    2.27    1.84 
  14   6  -3    4.44    1.46 
  12  -6  -3   12.33    1.58 
  12  -6  -3   13.56    1.79 
  12  -6  -3   12.28    2.23 
  12  -6  -3    9.72    1.74 
  12  -6  -3   11.74    1.37 
 -12   6   3   11.22    1.87 
  12   6  -3   10.48    2.38 
 -12   6   3   10.64    1.95 
  12   6  -3   14.47    1.72 
  12   6  -3   11.39    1.59 
 -12   6   3   12.84    1.96 
 -12   6   3   10.79    1.55 
  12   6  -3   10.03    2.00 
  12   6  -3   11.84    1.66 
  10  -6  -3    9.46    2.05 
  10  -6  -3   10.78    1.37 
  10  -6  -3   11.32    1.70 
  10  -6  -3   12.80    1.68 
  10  -6  -3   11.02    1.56 
 -10   6   3   11.90    1.69 
 -10   6   3   15.14    1.85 
 -10   6   3   10.14    1.83 
  10   6  -3   11.96    1.60 
  10   6  -3   11.03    2.27 
  10   6  -3    9.17    1.45 
  10   6  -3   10.20    1.83 
 -10   6   3   12.88    1.99 
  10   6  -3   11.10    1.60 
   8  -6  -3   14.58    2.27 
   8  -6  -3   12.09    1.62 
   8  -6  -3   14.20    1.60 
   8  -6  -3   16.77    1.63 
   8  -6  -3   15.77    1.81 
   8   6  -3   14.84    1.93 
   8   6  -3   11.89    1.84 
   8   6  -3   18.73    2.07 
  -8   6   3   12.98    1.99 
  -8   6   3   15.00    1.74 
   8   6  -3   18.10    2.45 
  -8   6   3   15.87    1.73 
  -8   6   3   20.04    2.56 
   8   6  -3   16.02    1.85 
   6  -6  -3    8.35    1.89 
   6  -6  -3    8.43    1.39 
   6  -6  -3    8.50    1.45 
   6  -6  -3    7.65    1.31 
   6  -6  -3    7.02    1.36 
   6   6  -3    7.46    1.59 
  -6   6   3   10.08    1.39 
   6   6  -3    7.75    1.25 
  -6   6   3    7.77    1.19 
  -6   6   3    8.66    1.62 
   6   6  -3    9.98    1.42 
   6   6  -3   10.19    2.21 
   6   6  -3    9.92    1.43 
   4  -6  -3   25.58    2.73 
   4  -6  -3   29.60    1.90 
  -4  -6   3   28.41    2.78 
   4  -6  -3   28.34    2.05 
   4  -6  -3   26.43    2.01 
   4  -6  -3   30.23    2.18 
   4   6  -3   29.01    2.05 
  -4   6   3   29.00    2.28 
   4   6  -3   31.64    2.97 
  -4   6   3   27.49    1.86 
  -4   6   3   27.71    1.73 
   4   6  -3   31.06    1.78 
   4   6  -3   30.06    2.18 
   4   6  -3   25.93    2.32 
   2  -6  -3    6.12    1.39 
   2  -6  -3    1.84    1.53 
  -2  -6   3    4.95    1.68 
   2   6  -3    4.52    1.31 
   2   6  -3    5.79    1.23 
  -2   6   3    2.99    1.18 
  -2   6   3    2.23    1.03 
   2   6  -3    4.26    0.97 
  -2   6   3    4.80    1.07 
   2   6  -3    6.46    1.94 
   0  -6  -3   15.09    1.85 
   0  -6   3   16.45    2.15 
   0   6   3   14.29    1.45 
   0   6  -3   14.95    2.11 
   0   6  -3   17.77    1.99 
   0   6   3   14.68    1.76 
   0   6   3   15.79    1.68 
   0   6  -3   14.05    1.90 
  -2  -6  -3    9.47    1.58 
   2  -6   3   14.19    2.01 
   2   6   3   12.55    1.60 
  -2   6  -3   12.47    1.40 
   2   6   3   10.13    1.19 
  -2   6  -3   17.01    2.03 
   2   6   3   12.74    1.40 
  -2   6  -3   10.50    1.95 
   4  -6   3    5.57    1.80 
  -4  -6  -3    7.47    1.73 
   4  -6   3    3.56    1.61 
   4   6   3    7.21    1.59 
  -4   6  -3    5.91    1.32 
  -4   6  -3    5.70    1.41 
  -4   6  -3    6.15    1.86 
   6  -6   3    6.84    1.82 
   6  -6   3    6.06    1.22 
  -6  -6  -3    7.32    1.76 
   6  -6   3    6.63    1.74 
  -6   6  -3    6.23    1.43 
  -6   6  -3    6.40    1.45 
  -6   6  -3    4.95    1.03 
   6   6   3    6.74    1.26 
  -6   6  -3    8.76    1.31 
   8  -6   3    7.77    2.15 
   8  -6   3    6.94    1.44 
  -8  -6  -3    9.00    1.93 
   8  -6   3    4.01    1.26 
   8  -6   3    9.09    1.99 
   8  -6   3    6.98    1.50 
  -8   6  -3    6.87    1.47 
  -8   6  -3    8.26    1.76 
  -8   6  -3    6.60    1.23 
   8   6   3    8.23    1.97 
  -8   6  -3    6.27    1.22 
  -8   6  -3    6.69    1.71 
   8   6   3    4.72    1.74 
   8   6   3   10.86    1.49 
  10  -6   3    0.80    1.25 
 -10  -6  -3    2.66    1.69 
  10  -6   3   -0.16    1.83 
  10  -6   3    5.04    2.14 
  10  -6   3    3.95    1.58 
 -10   6  -3    0.74    1.81 
 -10   6  -3   -1.78    1.16 
 -10   6  -3    2.37    1.59 
 -10   6  -3    1.67    1.51 
  10   6   3    1.68    1.37 
  10   6   3    2.17    1.72 
 -10   6  -3   -1.17    1.28 
  10   6   3    3.85    1.99 
  12  -6   3    7.13    2.48 
  12  -6   3    9.88    1.60 
 -12  -6  -3    8.20    2.02 
  12  -6   3    8.24    1.85 
  12  -6   3    7.06    2.25 
  12   6   3    7.98    1.30 
 -12   6  -3   10.47    1.96 
 -12   6  -3    5.60    1.59 
  12   6   3    9.34    1.89 
 -12   6  -3   12.89    1.94 
 -12   6  -3    9.38    2.14 
 -12   6  -3    7.72    1.35 
  12   6   3    6.47    1.76 
  14  -6   3   16.74    2.70 
  14  -6   3   15.20    2.36 
 -14  -6  -3   10.07    2.36 
  14  -6   3   14.14    1.99 
  14  -6   3   13.34    2.85 
  14   6   3   14.96    2.33 
 -14   6  -3   13.92    2.26 
 -14   6  -3   16.01    2.15 
 -14   6  -3   15.95    2.30 
  14   6   3   14.72    2.07 
  14   6   3   12.04    1.44 
 -14   6  -3   14.34    2.45 
 -16  -6  -3    7.51    2.48 
  16  -6   3   10.32    2.76 
  16  -6   3    8.36    2.09 
  16  -6   3    7.67    2.48 
  16   6   3    7.28    1.62 
 -16   6  -3    7.63    2.25 
  16   6   3    7.74    2.13 
 -16   6  -3   10.59    2.70 
 -16   6  -3   11.95    2.30 
  16   6   3   10.73    2.27 
 -16   6  -3    6.56    1.53 
  18  -6   3    3.28    2.78 
 -18  -6  -3   -0.20    2.45 
  18  -6   3    2.58    2.09 
  18  -6   3   -1.75    2.79 
 -18  -6  -3   -1.39    2.06 
  18   6   3    0.45    1.75 
 -18   6  -3    4.27    1.75 
  18   6   3    1.62    2.19 
 -18   6  -3    0.45    2.30 
 -18   6  -3    1.33    2.49 
 -18   6  -3    2.78    3.00 
  20  -6   3    6.76    2.59 
 -20  -6  -3    2.28    2.81 
 -20  -6  -3    5.12    2.39 
  20  -6   3    7.32    3.39 
 -20   6  -3    1.55    2.74 
 -20   6  -3    6.19    2.88 
 -20   6  -3    4.79    3.17 
  20   6   3    3.69    2.68 
 -20   6  -3    3.85    1.91 
 -22  -6  -3    1.77    3.17 
  22  -6   3    5.48    3.75 
  22  -6   3    7.98    3.01 
 -22  -6  -3    4.62    2.93 
 -22   6  -3   -4.36    3.81 
 -22   6  -3   -0.21    3.27 
  22   6   3   -0.92    2.65 
 -22   6  -3    1.97    3.12 
  23  -7  -3    9.21    4.35 
  23  -7  -3    8.16    3.28 
 -23   7   3   -2.68    3.54 
  23   7  -3    0.52    2.62 
 -23   7   3    1.24    4.27 
  23   7  -3   -4.02    3.32 
  21  -7  -3   -1.41    2.69 
  21  -7  -3    1.07    3.39 
  21   7  -3    1.06    2.96 
 -21   7   3    5.68    3.87 
  21   7  -3   -0.30    2.49 
 -21   7   3    2.80    3.09 
  21   7  -3   -2.87    2.96 
  19  -7  -3    3.95    3.10 
  19  -7  -3    1.26    3.00 
  19  -7  -3   -4.95    2.41 
  19   7  -3   -4.50    2.60 
  19   7  -3   -3.66    2.42 
 -19   7   3   -0.13    2.83 
 -19   7   3    2.68    3.49 
  19   7  -3   -2.57    2.19 
  17  -7  -3    3.59    2.58 
  17  -7  -3    0.87    2.25 
  17  -7  -3    4.19    3.07 
 -17   7   3   -3.41    2.51 
 -17   7   3    3.38    2.98 
  17   7  -3   -2.67    2.18 
  17   7  -3    0.28    2.14 
  17   7  -3    2.42    2.48 
  15  -7  -3   -0.95    2.03 
  15  -7  -3    2.67    2.92 
  15  -7  -3    2.11    2.36 
  15   7  -3    1.91    2.04 
  15   7  -3    0.18    1.98 
  15   7  -3   -0.19    2.19 
 -15   7   3   -2.46    2.65 
 -15   7   3   -3.62    2.13 
 -15   7   3   -1.73    2.25 
  13  -7  -3   -2.11    1.38 
  13  -7  -3   -2.14    2.07 
  13  -7  -3   -1.67    2.47 
  13  -7  -3   -0.42    1.83 
 -13   7   3    2.69    2.42 
  13   7  -3    0.55    1.86 
 -13   7   3    3.25    2.21 
  13   7  -3   -0.22    1.85 
 -13   7   3    2.58    2.30 
  11  -7  -3    4.27    2.05 
  11  -7  -3    1.76    1.79 
  11  -7  -3    6.57    2.68 
  11  -7  -3    5.51    1.58 
  11  -7  -3    3.25    1.97 
  11   7  -3    5.55    1.84 
 -11   7   3    1.33    1.99 
  11   7  -3    5.99    2.25 
 -11   7   3    1.19    2.41 
  11   7  -3    2.84    1.85 
 -11   7   3    3.89    2.25 
 -11   7   3    3.89    1.67 
   9  -7  -3   12.40    1.95 
   9  -7  -3   15.97    2.77 
   9  -7  -3    9.16    1.73 
   9  -7  -3    8.69    1.98 
  -9   7   3    7.73    2.35 
  -9   7   3    8.39    1.64 
  -9   7   3   10.51    1.92 
   9   7  -3   12.95    2.47 
   9   7  -3   10.17    1.94 
   9   7  -3   12.71    3.26 
  -9   7   3    9.24    2.31 
   9   7  -3   11.51    1.83 
   7  -7  -3    0.76    1.69 
   7  -7  -3    4.20    1.54 
   7  -7  -3    3.60    1.59 
   7  -7  -3    1.30    2.36 
   7  -7  -3    2.89    1.53 
  -7   7   3    4.16    2.01 
  -7   7   3    1.14    1.60 
   7   7  -3    4.75    1.48 
   7   7  -3    1.35    1.80 
   7   7  -3    3.43    2.90 
   7   7  -3    3.29    2.01 
  -7   7   3    6.36    2.38 
  -7   7   3    2.62    1.41 
   5  -7  -3    2.30    1.61 
   5  -7  -3    2.64    1.38 
   5  -7  -3    2.65    2.36 
  -5   7   3   -0.68    1.26 
   5   7  -3    0.44    1.86 
   5   7  -3    5.03    1.50 
   5   7  -3    3.20    1.77 
  -5   7   3    3.16    1.73 
   5   7  -3    5.23    2.89 
   3  -7  -3    0.85    1.50 
  -3  -7   3   -0.17    2.11 
   3  -7  -3   -1.22    2.25 
   3   7  -3    3.65    2.65 
   3   7  -3   -2.95    1.70 
  -3   7   3   -0.18    1.57 
  -3   7   3   -0.75    1.33 
  -3   7   3    3.14    1.36 
   3   7  -3    0.48    1.81 
   3   7  -3    2.60    1.18 
  -1  -7   3    7.63    2.34 
   1  -7  -3   13.21    1.99 
  -1   7   3   12.37    1.65 
   1   7  -3    7.59    2.63 
   1   7  -3   11.56    1.94 
   1  -7   3    6.21    2.26 
  -1  -7  -3    3.29    1.80 
  -1   7  -3    2.25    1.66 
  -1   7  -3    3.29    1.62 
  -1   7  -3    4.64    2.42 
   1   7   3    6.51    1.69 
  -3  -7  -3   10.19    1.99 
   3  -7   3    7.97    2.69 
   3   7   3   10.16    2.04 
  -3   7  -3    7.87    1.93 
  -3   7  -3   10.59    1.81 
  -5  -7  -3    5.16    2.04 
   5  -7   3    4.90    2.26 
   5  -7   3    0.89    2.45 
   5   7   3    4.36    2.22 
  -5   7  -3    6.39    1.89 
  -5   7  -3    3.18    1.84 
  -7  -7  -3    3.47    2.29 
   7  -7   3    3.88    2.52 
   7  -7   3    0.98    2.61 
   7   7   3    2.66    2.41 
  -7   7  -3    4.48    1.65 
  -7   7  -3    4.75    2.01 
  -7   7  -3    7.80    2.05 
   7   7   3    5.40    2.46 
  -9  -7  -3   -0.35    2.20 
   9  -7   3    7.50    2.66 
   9  -7   3    4.66    1.79 
   9  -7   3    2.00    1.73 
   9  -7   3    5.95    2.89 
  -9   7  -3   -1.89    1.93 
  -9   7  -3    1.15    2.32 
  -9   7  -3   -1.46    1.51 
   9   7   3    6.96    2.41 
  -9   7  -3    2.77    1.70 
  11  -7   3   10.07    3.09 
  11  -7   3    1.79    2.11 
  11  -7   3   12.51    3.12 
 -11  -7  -3    6.96    2.58 
  11  -7   3    7.56    2.07 
 -11   7  -3    8.94    2.63 
 -11   7  -3    8.40    2.45 
 -11   7  -3    8.76    1.84 
  11   7   3    8.21    2.43 
 -11   7  -3    8.04    2.43 
  13  -7   3    3.71    2.17 
  13  -7   3    1.98    3.09 
 -13  -7  -3   -2.37    2.46 
 -13   7  -3    1.63    2.50 
 -13   7  -3    1.33    1.87 
  13   7   3   -0.79    2.36 
 -13   7  -3   -0.53    2.43 
 -13   7  -3    1.72    2.74 
  15  -7   3    5.34    3.46 
  15  -7   3    0.04    2.38 
 -15  -7  -3    0.10    2.84 
  15  -7   3    7.33    3.87 
 -15   7  -3    4.24    3.25 
 -15   7  -3   -0.61    2.60 
 -15   7  -3    1.93    2.66 
  15   7   3    4.02    2.62 
  17  -7   3    2.11    3.61 
 -17  -7  -3    1.70    3.32 
  17  -7   3    0.96    2.77 
 -17   7  -3    5.49    2.96 
  17   7   3    0.62    2.99 
 -17   7  -3    5.96    3.09 
  19  -7   3    5.44    4.25 
 -19  -7  -3    8.83    3.51 
  19  -7   3    3.04    3.14 
  19   7   3    5.48    3.14 
 -19   7  -3    6.56    3.47 
 -19   7  -3    4.36    3.39 
  18  -8  -3    0.71    4.46 
  18  -8  -3    2.34    3.17 
 -18   8   3    6.04    3.59 
  18   8  -3    3.66    3.52 
  18   8  -3    5.30    3.17 
  16  -8  -3   11.11    4.02 
  16  -8  -3   -1.08    2.95 
  16   8  -3    5.69    2.93 
  16   8  -3    3.31    2.84 
 -16   8   3    5.24    3.26 
  14  -8  -3    4.49    3.84 
  14  -8  -3    2.29    2.79 
  14   8  -3    4.66    2.65 
  14   8  -3    8.80    2.92 
 -14   8   3    2.55    2.95 
  12  -8  -3    5.33    2.14 
  12  -8  -3   13.32    3.68 
  12  -8  -3    8.50    2.77 
 -12   8   3   12.79    2.84 
  12   8  -3    5.09    2.64 
  12   8  -3    6.69    2.74 
  10  -8  -3    8.52    2.37 
  10  -8  -3   10.12    3.63 
  10  -8  -3    8.18    2.26 
  10   8  -3   14.12    2.46 
  10   8  -3   11.52    2.78 
 -10   8   3    7.24    2.51 
   8  -8  -3   15.05    3.67 
   8  -8  -3   17.45    2.64 
   8   8  -3   31.14    3.46 
   8   8  -3   20.47    2.81 
   6  -8  -3   22.40    3.60 
   6  -8  -3   19.30    2.67 
   6   8  -3   18.26    3.21 
   6   8  -3   19.69    2.75 
   6   8  -3   27.25    3.24 
  -6   8   3   16.72    2.28 
   4  -8  -3   -0.99    2.24 
   4   8  -3    2.69    2.85 
   4   8  -3    4.47    2.51 
   2  -8  -3    5.64    2.53 
   2   8  -3    8.36    2.72 
   2   8  -3    3.87    2.63 
   0  -8  -3    8.27    2.61 
   0  -8   3   17.45    3.68 
   0   8   3   13.86    2.31 
   2  -8   3    1.75    3.39 
  -2  -8  -3   -1.82    2.67 
  -2   8  -3    3.00    2.76 
   2   8   3   -0.34    2.40 
  -4  -8  -3   -3.08    2.66 
   4  -8   3    4.20    3.34 
  -4   8  -3    2.15    2.62 
   4   8   3    5.79    2.90 
   6  -8   3   13.41    3.93 
  -6  -8  -3    6.93    2.95 
   6   8   3   11.34    3.24 
  -6   8  -3   12.01    2.58 
   6   8   3    6.40    3.04 
   8  -8   3   10.10    3.68 
  -8  -8  -3   -2.55    2.91 
   8   8   3    7.59    3.16 
   8   8   3   -1.47    3.67 
  -8   8  -3    1.65    2.60 
 -10  -8  -3    4.80    3.29 
  10  -8   3    6.10    3.92 
  10   8   3    5.11    3.27 
 -10   8  -3    4.59    2.93 
  12  -8   3   -0.54    2.73 
 -12  -8  -3    2.59    3.83 
  12  -8   3    6.93    4.20 
 -12   8  -3   -0.65    3.02 
  12   8   3    1.99    3.20 
  38   0  -4    8.03    3.19 
  38   0  -4    6.15    3.35 
 -38   0   4    1.77    4.21 
 -36   0   4    4.08    3.18 
  36   0  -4    4.34    2.76 
 -36   0   4    0.69    2.93 
  36   0  -4   -0.62    2.68 
  36   0  -4    6.44    2.95 
  34   0  -4    8.78    2.13 
  34   0  -4   -2.63    2.83 
  34   0  -4    1.45    2.22 
  34   0  -4    4.33    2.50 
  34   0  -4    8.95    2.50 
 -34   0   4    3.68    2.57 
 -34   0   4    5.02    2.82 
  32   0  -4    0.68    1.74 
  32   0  -4    2.40    1.99 
 -32   0   4   -2.66    1.82 
  32   0  -4    3.66    1.78 
 -32   0   4    3.25    2.25 
 -32   0   4    0.78    2.22 
  32   0  -4    2.37    2.39 
  32   0  -4   -0.12    1.95 
  30   0  -4    0.95    1.33 
 -30   0   4    1.45    1.66 
  30   0  -4    0.26    1.64 
 -30   0   4    0.80    1.91 
  30   0  -4    1.21    1.82 
 -30   0   4   -0.20    1.87 
  30   0  -4   -0.50    1.42 
  30   0  -4   -2.92    1.44 
 -30   0   4   -1.16    1.50 
  28   0  -4    1.66    1.06 
  28   0  -4    0.96    1.36 
 -28   0   4    0.54    1.29 
 -28   0   4    3.74    1.77 
  28   0  -4    1.52    1.29 
 -28   0   4    2.27    1.42 
  28   0  -4   -0.38    1.22 
  28   0  -4    1.88    1.56 
 -28   0   4   -3.13    1.44 
 -26   0   4   14.03    1.80 
  26   0  -4   12.45    1.73 
  26   0  -4   12.44    1.55 
 -26   0   4   10.50    1.37 
 -26   0   4    9.15    1.77 
  26   0  -4   10.78    1.48 
  26   0  -4   10.13    1.39 
  26   0  -4   13.21    1.61 
 -26   0   4   12.01    1.63 
  24   0  -4    1.91    1.06 
 -24   0   4    1.42    1.01 
  24   0  -4    0.85    0.93 
  24   0  -4    1.04    1.05 
  24   0  -4   -1.17    1.02 
 -24   0   4    0.47    1.19 
  24   0  -4    1.30    0.82 
 -24   0   4    1.00    0.83 
  24   0  -4    1.09    1.07 
 -24   0   4    0.01    1.12 
  24   0  -4    1.42    1.09 
  22   0  -4    0.52    0.91 
  22   0  -4    1.08    0.82 
  22   0  -4    1.55    0.88 
 -22   0   4    0.71    0.76 
 -22   0   4    0.59    0.67 
  22   0  -4    1.64    0.94 
 -22   0   4   -0.19    1.03 
  22   0  -4    0.23    0.68 
  22   0  -4    1.17    0.84 
  22   0  -4    1.76    0.97 
 -22   0   4    0.55    0.96 
 -20   0   4   49.63    1.82 
  20   0  -4   52.89    2.04
[truncated: 1,175,916 more chars]
